# Supplementary material for: Gene Expression Profile Provides Novel Insights of Fasting-Refeeding Response in Zebrafish Skeletal Muscle
Source: Preprints.org preprint supplement (doi:10.20944/preprints202205.0083.v1), 2022-05-06
Supplement: Supplementary file 1 [file supplementary]

## Sheet: Sheet1
Name	Chromosome	Region	Identifier	Refed_3h vs. Fast - Fold change	Refed_3h vs. Fast - Log fold change	Refed_3h vs. Fast - FDR p-value	Refed_8h vs. Fast - Fold change	Refed_8h vs. Fast - Log fold change	Refed_8h vs. Fast - FDR p-value	Refed_8h vs. Refed_3h - Fold change	Refed_8h vs. Refed_3h - Log fold change	Refed_8h vs. Refed_3h - FDR p-value	Fast_1_TPM	Fast_2_TPM	Fast_3_TPM	Fast_4_TPM	Refed_3h_1_TPM	Refed_3h_2_TPM	Refed_3h_3_TPM	Refed_3h_4_TPM	Refed_8h_1_TPM	Refed_8h_2_TPM	Refed_8h_3_TPM	Refed_8h_4_TPM
rpl24	1	complement(6408..12027)	ENSDARG00000099104	1.20614	0.270397	0.730154	1.06098	0.085396	0.98442	-1.13682	-0.185001	0.852251	1047.84	1196.33	948.191	1150.93	952.082	1361.39	919.805	927.8	1038.71	1219.6	1024.88	1008.88
cep97	1	11822..16373	ENSDARG00000102407	1.32042	0.400996	0.642436	-1.17648	-0.23448	0.93592	-1.55345	-0.635476	0.370443	3.08907	2.7829	2.29124	2.23184	2.86798	3.25403	2.56138	2.11529	2.72236	2.35509	1.6257	1.62818
nfkbiz	1	18716..23389	ENSDARG00000102097	-1.12073	-0.164444	0.823101	-1.09628	-0.132619	0.958909	1.0223	0.0318248	0.982173	15.0664	15.2324	11.8437	12.4096	8.58733	11.1491	11.7686	7.20721	17.5291	8.68913	8.26527	13.1575
CU651657.1	1	25585..27255	ENSDARG00000099319	1.10841	0.14849	0.969314	2.09216	1.065	0.93592	1.88754	0.916505	0.821071	0	0.0630741	0	0.061285	0.0620479	0.0553141	0	0	0.125394	0	0	0.162199
eed	1	27690..34330	ENSDARG00000099640	1.16872	0.224925	0.734657	1.0441	0.0622563	0.990041	-1.11936	-0.162669	0.842957	14.0127	14.7866	14.0087	14.3672	14.8781	16.4609	10.5567	10.8704	18.9936	12.3047	12.1484	13.1379
hikeshi	1	36552..39191	ENSDARG00000104071	1.09105	0.125717	0.854182	-1.01162	-0.0166663	0.995172	-1.10373	-0.142383	0.86417	24.7524	26.8777	30.2579	34.6248	25.2521	25.8662	24.495	24.435	26.5169	30.348	18.8328	32.531
tmem39a	1	complement(39313..44565)	ENSDARG00000102746	1.55141	0.633583	0.120488	1.00101	0.00145849	0.99865	-1.54985	-0.632124	0.110573	10.9699	11.3119	13.7124	12.6133	17.5335	17.8271	12.7502	11.545	12.2816	12.7053	9.43062	11.0203
ildr1a	1	complement(44839..50247)	ENSDARG00000103929	-1.65382	-0.725801	0.16816	-1.4132	-0.498964	0.69709	1.17027	0.226837	0.821071	40.1099	35.9225	19.5061	23.2691	12.728	23.5391	12.5651	8.59238	27.5597	19.4365	11.0089	21.4237
si:zfos-1011f11.2	1	complement(60979..65017)	ENSDARG00000101073	1.26085	0.334398	0.872262	1.08643	0.119592	0.995172	-1.16055	-0.214806	0.939287	0.806509	0.429024	1.71179	0.138952	0.844087	0.752482	0.740387	0.472286	0.568612	0.415882	0.730991	1.10326
gpa33a	1	complement(65705..71523)	ENSDARG00000100223	-1.35777	-0.441242	0.538412	-1.42715	-0.51314	0.697188	-1.0511	-0.0718981	0.966084	98.4533	92.1425	63.7725	70.9689	48.3896	69.1204	37.2094	35.2873	84.0882	45.5188	34.8895	53.0404
f7l	1	109798..119146	ENSDARG00000100782	1.3593	0.442859	0.730154	1.98755	0.990994	0.420146	1.46219	0.548135	0.651691	0.787007	0.587578	0.830316	0.570912	0.686396	0.515289	1.40694	0.394161	1.05862	1.70874	0.976115	1.29064
f7	1	119960..125246	ENSDARG00000034862	1.54809	0.630491	0.871004	-1.04677	-0.0659497	0.995172	-1.6205	-0.696441	0.868174	0	0.0582625	0.0774886	0	0	0.102189	0.0603278	0	0.0579142	0.0564778	0	0
f7i	1	127250..134079	ENSDARG00000075827	#N/A	#N/A	#N/A	#N/A	#N/A	#N/A	#N/A	#N/A	#N/A	0	0	0	0	0	0	0	0	0	0	0	0
f10	1	135903..142469	ENSDARG00000088581	2.56207	1.35731	0.0695049	2.41092	1.26958	0.163403	-1.06269	-0.0877265	0.976355	5.92872	4.05818	5.19174	4.28105	6.04526	23.1837	6.04293	4.94605	4.68704	6.51899	25.6035	4.80381
prozb	1	144284..151998	ENSDARG00000076900	11.9221	3.57556	0.289258	10.7183	3.422	0.542144	-1.11231	-0.153557	0.982173	0	0	0	0.0674176	0	0.912737	0	0.114574	0	0	0.993069	0
pcid2	1	complement(152007..157563)	ENSDARG00000013802	-1.28251	-0.358967	0.60889	1.1829	0.24233	0.93592	1.51708	0.601298	0.260122	8.81659	8.52144	7.07276	7.6572	3.90777	8.48444	3.98053	3.49132	11.2728	8.01198	7.72904	8.78734
cul4a	1	157793..167398	ENSDARG00000096578	-1.12873	-0.174704	0.797268	-1.07511	-0.104478	0.969672	1.04988	0.0702259	0.946946	24.7619	17.9263	28.2836	21.2354	13.4313	14.9886	18.3583	16.3413	19.0396	18.7578	18.4266	23.1124
FO681286.1	1	complement(160302..201004)	ENSDARG00000109848	#N/A	#N/A	#N/A	#N/A	#N/A	#N/A	#N/A	#N/A	#N/A	0	0	0	0	0	0	0	0	0	0	0	0
lamp1a	1	176583..182258	ENSDARG00000100181	-1.02239	-0.0319402	0.969314	1.23203	0.301035	0.901892	1.25961	0.332975	0.69258	10.056	9.79819	12.5619	6.60415	6.25218	9.90873	8.1347	5.61175	12.1087	9.07022	9.20461	14.4521
grtp1a	1	complement(184915..192033)	ENSDARG00000029936	1.15135	0.203326	0.797268	-1.84685	-0.88507	0.0435881	-2.12637	-1.0884	0.00258396	19.5258	21.8379	12.1221	13.373	12.3359	20.8142	12.6678	14.8987	9.48556	6.93772	7.37915	10.5394
adprhl1	1	complement(200294..206208)	ENSDARG00000041589	1.29227	0.369907	0.797544	-1.11948	-0.162825	0.982781	-1.44667	-0.532733	0.713632	0.927538	0.753813	1.18485	0.665847	0.741548	1.20195	1.20628	0.396053	0.61307	0.730722	0.700572	0.822384
dcun1d2b	1	complement(208181..214911)	ENSDARG00000041592	-1.22792	-0.296222	0.587291	1.08694	0.120279	0.956927	1.33469	0.416501	0.370828	22.5144	21.589	23.8178	20.0826	13.7871	16.5741	10.4076	14.844	23.7115	21.2021	21.9259	22.4497
tmco3	1	218524..225137	ENSDARG00000075108	-1.44511	-0.531178	0.537426	1.03092	0.043929	0.995172	1.48979	0.575107	0.504335	6.18792	3.63983	2.8765	3.53659	2.28329	2.82193	2.67643	1.08882	5.87281	3.6306	1.88748	4.29567
tfdp1b	1	227241..243798	ENSDARG00000016304	1.23635	0.306083	0.677233	1.10719	0.146909	0.961394	-1.11665	-0.159174	0.86417	3.78095	3.1566	3.15797	2.33422	3.32508	3.84614	3.0371	1.91427	4.91485	2.65372	2.4274	2.96919
grk1a	1	245076..258138	ENSDARG00000058803	-1.14529	-0.195709	0.969314	2.28991	1.19529	0.900246	2.6226	1.391	0.665141	0.117238	0	0	0	0	0	0.0269066	0.0429086	0.0516602	0.100758	0.0796953	0.0222744
cenpe	1	260039..296057	ENSDARG00000063385	-2.59962	-1.3783	0.0362694	1.57807	0.658162	0.742994	4.10238	2.03646	0.000124822	2.18977	1.64274	0.513105	0.894809	0.452974	0.622093	0.309268	0.205499	3.67408	1.48385	0.91603	1.83485
gas6	1	complement(312784..338445)	ENSDARG00000007804	1.21881	0.285471	0.651168	1.3882	0.473214	0.565732	1.13898	0.187742	0.821071	10.9097	8.83303	8.18629	9.66986	8.92522	11.2865	7.78043	7.91978	15.574	15.1102	8.58062	9.14754
pros1	1	complement(343292..354166)	ENSDARG00000068261	1.21398	0.279746	0.665089	1.16303	0.217893	0.93592	-1.04381	-0.0618528	0.961935	7.81325	6.60492	8.94518	9.00026	7.52754	7.0638	8.0067	7.94706	7.88653	10.3457	8.60502	7.83656
rasa3	1	complement(357518..411331)	ENSDARG00000063371	1.10841	0.14849	0.893578	1.02476	0.0352872	0.995172	-1.08163	-0.113203	0.937292	2.99869	1.05615	3.34216	2.86627	1.68385	2.13988	3.12994	1.83419	2.20828	2.0476	3.09022	2.21648
tpp2	1	418869..443759	ENSDARG00000078751	1.08702	0.120377	0.856884	-1.00522	-0.0075169	0.995172	-1.0927	-0.127894	0.86417	7.63545	6.36676	9.76852	6.7638	6.14999	7.58477	6.96974	5.25658	8.0062	6.11597	7.25378	6.8712
si:ch73-244f7.3	1	complement(454315..462165)	ENSDARG00000078878	-4.41043	-2.14092	0.0018717	1.21963	0.286448	0.937885	5.3791	2.42737	0.000130859	5.30712	3.24137	8.48293	2.64146	0.411436	0.916963	0.324801	1.5539	3.74167	4.45973	8.12386	5.28804
zgc:92518	1	complement(466780..471925)	ENSDARG00000016343	-1.75651	-0.81271	0.127715	1.09811	0.135027	0.970161	1.92884	0.947737	0.0454934	13.8644	25.8915	37.2182	12.2609	6.56052	13.3599	11.7799	9.01495	23.0721	25.9857	22.4586	20.2883
ercc5	1	complement(474085..494280)	ENSDARG00000023678	-1.50596	-0.590683	0.194072	-1.08239	-0.114223	0.968644	1.39133	0.47646	0.360986	5.62171	4.60317	5.06664	3.70147	2.15484	2.78403	2.46535	2.33273	4.41788	3.16968	3.66733	4.97985
blzf1	1	494297..505620	ENSDARG00000011299	-1.32943	-0.410807	0.421575	-1.20928	-0.274147	0.874737	1.09936	0.136661	0.86417	15.6996	15.3733	15.1505	12.5822	9.19649	9.8685	7.8874	7.71847	11.048	9.93489	9.45096	15.196
trmt10c	1	complement(508885..513786)	ENSDARG00000041575	-1.06366	-0.0890325	0.923747	-1.22655	-0.294603	0.901403	-1.15314	-0.205571	0.821071	7.69926	6.9513	12.5768	8.27534	4.92844	8.84207	6.74381	5.63579	5.976	6.19202	7.61855	6.97851
txnl4b	1	513986..518076	ENSDARG00000058962	1.01397	0.020015	0.984141	1.40018	0.48561	0.870801	1.38089	0.465595	0.692161	5.92546	5.69121	3.63907	3.2966	3.55296	7.10261	2.83315	1.62652	5.43961	4.77422	7.72026	6.28567
si:ch73-41e3.7	1	complement(518853..524433)	ENSDARG00000089799	1.1008	0.138548	0.969314	2.29604	1.19915	0.901892	2.0858	1.0606	0.764225	0.101868	0.180629	0	0	0	0	0.0935158	0.149132	0.179549	0.262643	0	0.232249
mrpl16	1	524388..532429	ENSDARG00000075325	-1.02744	-0.0390588	0.969314	-1.18248	-0.241811	0.906311	-1.15089	-0.202752	0.804868	28.7476	20.5858	26.2551	30.3806	17.4909	17.1935	20.8956	23.6385	20.5636	22.1834	20.7686	19.0367
mrpl39	1	532766..591331	ENSDARG00000041570	1.07674	0.106665	0.890854	-1.22428	-0.291929	0.870801	-1.31822	-0.398594	0.490605	21.3728	23.8038	27.7094	24.9148	20.6344	22.5701	17.9123	21.3655	18.4607	21.0185	18.5523	16.2427
CU571081.1	1	complement(552275..558260)	ENSDARG00000113329	1.0131	0.0187695	0.989393	-1.37792	-0.462488	0.93592	-1.39596	-0.481258	0.80579	3.32006	0.379808	1.38914	1.38388	1.49451	1.08251	1.96636	0.470371	1.88769	0.276131	0.679492	1.46505
jam2a	1	594584..608247	ENSDARG00000058996	1.26591	0.340171	0.597187	1.15192	0.204038	0.93592	-1.09896	-0.136133	0.87284	11.393	14.7373	17.5084	12.2277	13.6831	14.1585	14.3167	13.4664	17.4474	17.3357	14.4736	10.7874
atp5pf	1	complement(610082..614638)	ENSDARG00000014313	1.31704	0.397304	0.542465	1.13231	0.179274	0.93592	-1.16314	-0.218029	0.813071	313.697	385.02	299.262	341.092	354.213	364.445	332.07	341.133	312.33	378.46	366.777	357.571
appa	1	complement(617620..656693)	ENSDARG00000104279	-1.17953	-0.238214	0.75238	-1.27935	-0.355414	0.852055	-1.08463	-0.1172	0.904668	55.3085	48.0296	44.8632	40.9732	33.9645	35.8512	30.925	25.2559	41.812	30.8336	32.6077	33.0906
cyyr1	1	complement(658405..669717)	ENSDARG00000103783	-1.00775	-0.0111427	0.989338	-1.01895	-0.0270868	0.995172	-1.01111	-0.0159442	0.988293	3.04507	2.26776	2.15436	3.32264	1.84135	2.90422	2.16179	1.57513	3.82857	3.00084	1.61916	1.48106
adamts1	1	complement(673163..681116)	ENSDARG00000103519	2.95478	1.56305	0.0410252	2.39385	1.25933	0.234297	-1.23432	-0.303721	0.842797	0.738652	0.308178	0.204937	0.336866	0.8337	1.01349	1.35618	0.572491	0.765839	0.858871	1.14207	0.825519
adamts5	1	complement(691738..714626)	ENSDARG00000100307	-1.43771	-0.523773	0.688339	-1.54455	-0.627189	0.860759	-1.07431	-0.103415	0.97481	1.22513	0.374544	1.34498	0.618665	0.589521	0.295618	0.581732	0.402005	0.335075	0.726143	0.45948	0.513688
gart	1	complement(960209..999556)	ENSDARG00000101089	-1.55331	-0.635348	0.318063	-1.10122	-0.139108	0.969992	1.41053	0.496241	0.520145	4.83968	2.82647	2.49103	2.91174	1.80899	2.15023	1.51623	1.09652	3.99434	2.4428	2.054	2.59796
n6amt1	1	961607..970951	ENSDARG00000115421	1.75765	0.813646	0.164596	1.56726	0.648241	0.547686	-1.12148	-0.165405	0.877431	5.23111	6.91126	4.11218	4.41792	10.4666	6.53947	6.21465	5.70614	8.40666	7.75738	6.60061	7.95097
runx1	1	complement(1362932..1402303)	ENSDARG00000087646	-1.55943	-0.641015	0.598571	-1.23163	-0.300574	0.938134	1.26614	0.340441	0.838878	1.23163	0.379808	0.883999	1.43001	0.607147	0.291446	0.540749	0.509568	0.566307	0.690326	0.873633	0.813917
urp2	1	1599979..1614500	ENSDARG00000067781	1.04608	0.0649902	0.969314	-1.26467	-0.338757	0.961636	-1.32294	-0.403747	0.86417	0.672903	0.894878	0.132242	0.869496	0.684692	0.261594	0.411823	0.82093	0.494183	0.481926	0.609895	0.426155
clic6	1	complement(1618994..1631399)	ENSDARG00000099108	1.00239	0.00343996	0.997147	-1.0374	-0.0529667	0.995172	-1.03987	-0.0564067	0.982173	4.13494	2.74948	5.94228	3.11674	3.04284	2.71262	2.25383	3.97259	2.27754	2.77631	4.21623	4.71364
atp1a1a.4	1	1689775..1706159	ENSDARG00000001870	1.09195	0.126904	0.969314	2.09549	1.06729	0.862237	1.91904	0.940385	0.695106	0.0732467	0.0649395	0.086369	0	0.0638829	0.028475	0.0336208	0.0536159	0.0645513	0.125901	0.0663882	0.166996
atp1a1a.1	1	1712140..1793371	ENSDARG00000002791	-1.33822	-0.420312	0.508475	-1.16705	-0.222869	0.93592	1.14666	0.197443	0.826872	67.0011	48.2192	49.1379	44.0182	31.4062	39.1496	34.3025	18.2675	49.0067	39.8066	34.0823	42.9048
atp1a1a.2	1	1789357..1796832	ENSDARG00000007739	-1.2373	-0.307193	0.875999	-2.94227	-1.55693	0.438239	-2.37798	-1.24974	0.457256	0.257474	0.163052	0.433716	0.285169	0.384958	0.114393	0.168832	0.0538481	0.129662	0.0632229	0.100014	0.0559064
atp1a1a.3	1	1805294..1815660	ENSDARG00000039131	1.06427	0.089863	0.944687	-1.07871	-0.109309	0.982781	-1.14804	-0.199172	0.86417	4.07545	4.48428	2.61732	5.92439	3.4275	5.34718	4.60984	1.54487	5.77228	3.84656	3.29807	2.15699
atp1a1a.5	1	1838164..1850104	ENSDARG00000040252	1.24351	0.314415	0.874172	-1.1241	-0.168772	0.990175	-1.39783	-0.483187	0.82271	0.248962	0.0827723	0.183478	0.107233	0.162851	0.241963	0.171413	0.0227797	0.137129	0.160474	0.0846189	0.118252
si:ch211-132g1.3	1	complement(1870861..1928122)	ENSDARG00000089477	1.73832	0.797691	0.16565	1.28867	0.365887	0.885952	-1.34892	-0.431804	0.603274	4.13794	2.2929	3.25284	3.26753	3.94728	3.04972	6.29157	4.10167	5.05221	2.14857	3.16446	5.37221
si:ch211-132g1.6	1	1896737..1899848	ENSDARG00000093102	-1.73133	-0.791884	0.548146	1.00582	0.00836668	0.996689	1.7414	0.800251	0.562583	2.98692	1.5889	1.05661	3.08766	1.95381	0.696708	0.685509	0.655919	1.84263	1.15517	2.57188	2.72396
si:ch211-132g1.4	1	1904419..1911381	ENSDARG00000095102	-1.0896	-0.123797	0.907664	-1.08986	-0.124146	0.977354	-1.00024	-0.000348804	0.999692	12.1284	6.11802	13.1917	9.81741	10.122	4.87757	9.40636	4.97468	10.0436	8.7162	6.5388	9.53507
si:ch211-132g1.1	1	1915967..1923253	ENSDARG00000040250	-1.64438	-0.717543	0.699885	-1.02293	-0.0327083	0.995172	1.60752	0.684835	0.746825	1.88698	0.912526	2.42731	1.03442	0.897679	0.400129	1.73227	0	0.604715	0.737145	2.33221	1.82515
si:ch211-132g1.7	1	1941031..2000357	ENSDARG00000075505	-2.12629	-1.08834	0.52029	-1.72685	-0.788146	0.888569	1.23131	0.300194	0.914219	0.864292	0.174152	0.648538	0.203055	0.0342637	0.397088	0.14426	0.0862709	0.138489	0.0337635	0.320467	0.477699
slc5a3a	1	2025085..2027100	ENSDARG00000010376	1.12436	0.169109	0.969314	1.35001	0.432969	0.968644	1.20069	0.26386	0.951035	0.235872	0	0.0695322	0.203189	0.0514295	0.0458482	0.378934	0	0.155903	0.202715	0.0534464	0.224069
oxgr1a.1	1	complement(2048047..2051599)	ENSDARG00000033684	2.80072	1.4858	0.30143	1.56938	0.650195	0.93592	-1.7846	-0.835603	0.660919	0.368619	0.245109	0.108664	0.396927	0.321494	0.64486	0.676794	0.876932	0.812146	0	0.668205	0.280139
oxgr1a.3	1	complement(2060430..2061419)	ENSDARG00000040247	-1.27338	-0.348663	0.942731	-1.06163	-0.0862876	0.995172	1.19945	0.262375	0.974521	0	0.212923	0	0.413767	0	0	0.110235	0.263693	0.529125	0.1032	0	0
oxgr1a.2	1	complement(2074513..2075529)	ENSDARG00000078743	3.57785	1.83909	0.797268	7.14143	2.83621	0.869916	1.99601	0.997122	0.835616	0	0	0	0	0	0.0908848	0	0	0	0.10046	0.105947	0.0888346
mbnl2	1	2101541..2217861	ENSDARG00000018460	-1.0651	-0.0909841	0.921156	1.09556	0.131672	0.964285	1.16688	0.222656	0.805172	41.4195	26.2483	33.9342	30.5475	28.0226	21.7321	26.59	19.8086	25.3803	30.2806	36.6036	40.2825
rap2ab	1	2222363..2240119	ENSDARG00000040246	2.88224	1.52719	0.645887	3.5158	1.81385	0.817542	1.21982	0.286663	0.958075	0.642592	0	0	0	0	1.33232	0.196636	0	0	0.368174	0.776562	0.976701
kpnb3	1	2260407..2299553	ENSDARG00000040245	-1.16934	-0.225689	0.799217	-1.15455	-0.207333	0.93592	1.01281	0.0183567	0.984429	41.3358	31.6743	83.8857	43.9795	38.3742	36.875	32.1989	27.1259	36.8531	27.3926	46.7353	51.7394
farp1	1	2301958..2444210	ENSDARG00000074381	-1.2106	-0.275724	0.70936	-1.27016	-0.345007	0.863205	-1.0492	-0.0692835	0.961526	6.19674	2.39585	4.39512	2.60885	1.86924	3.11541	2.67326	2.14861	2.95638	2.74291	2.78713	2.56712
si:ch211-235f1.3	1	complement(2331637..2334254)	ENSDARG00000095179	#N/A	#N/A	#N/A	#N/A	#N/A	#N/A	#N/A	#N/A	#N/A	0	0	0	0	0	0	0	0	0	0	0	0
ggact.3	1	complement(2446996..2453185)	ENSDARG00000070579	3.17714	1.66773	0.509503	8.22149	3.0394	0.135811	2.5877	1.37167	0.59396	0.197038	0.232921	0.0774458	0.113157	0	1.68519	0.0602945	0	0.0578822	0.0564466	2.38117	2.54563
ggact.2	1	complement(2450140..2453174)	ENSDARG00000038248	16.0375	4.00338	0.00735027	50.626	5.66181	6.80315e-06	3.15672	1.65843	0.415059	0.106142	0.0941043	0.062579	0.18287	0.13886	6.27203	0	0.0776952	0.0935418	7.75384	6.20513	7.42118
ggact.1	1	complement(2454094..2457546)	ENSDARG00000070581	7.1714	2.84226	0.0423016	23.6936	4.56643	3.18614e-05	3.3039	1.72417	0.313209	0.531305	0.588809	0.234933	0.686529	0.0579229	12.3412	0.243873	0.194455	0.877934	18.0935	9.6913	15.7473
gpc6a	1	2712956..3036019	ENSDARG00000103156	1.26492	0.339051	0.798589	1.56262	0.64397	0.820397	1.23535	0.304919	0.842017	0.647043	1.61668	1.734	1.26679	0.923442	1.69218	1.88998	0.904201	2.02172	2.47711	2.18588	1.02817
gpc5a	1	complement(3100244..3295045)	ENSDARG00000103647	-1.61435	-0.69095	0.579824	1.07892	0.109592	0.991879	1.74176	0.800542	0.506173	2.18127	1.09587	1.02882	1.06479	0.126828	0.734916	0.734228	0.904781	1.66602	1.49972	0.988514	1.21565
slitrk6	1	4101741..4154332	ENSDARG00000098769	-1.53247	-0.615857	0.163512	-1.41683	-0.502666	0.507231	1.08162	0.113191	0.898065	8.7708	4.19962	5.65753	7.08163	3.17176	3.96807	3.78739	2.19224	4.30917	4.14977	3.65623	4.5753
spry2	1	5273481..5277583	ENSDARG00000078308	1.27249	0.347659	0.465828	1.20623	0.270504	0.860362	-1.05494	-0.0771556	0.927516	27.999	22.9882	22.5186	21.5336	22.2079	27.5237	26.3687	18.9797	30.2852	24.6414	20.5458	31.8193
ndfip2	1	complement(5354489..5394791)	ENSDARG00000033928	-1.08924	-0.123318	0.899711	-1.18557	-0.245577	0.93592	-1.08844	-0.122259	0.914371	46.9221	39.4444	71.279	67.2054	46.9457	46.6454	29.9991	37.9226	41.0648	39.0572	45.205	51.9957
tuba8l2	1	5402476..5419116	ENSDARG00000031164	1.04922	0.0693229	0.950289	1.01374	0.0196921	0.995172	-1.035	-0.0496309	0.978825	449.256	357.606	477.261	581.618	398.495	351.359	369.067	400.576	428.014	479.736	396.921	448.537
stk16	1	5422439..5434261	ENSDARG00000037777	1.03922	0.0554953	0.969314	-1.13732	-0.185638	0.961394	-1.18192	-0.241133	0.841532	2.94135	2.55343	4.26311	3.06166	2.35155	3.23981	3.20648	1.70449	4.21227	1.79058	1.61067	3.02702
atic	1	5437390..5504130	ENSDARG00000016706	1.02052	0.02931	0.969314	1.06022	0.0843569	0.981318	1.03889	0.0550468	0.9706	20.7811	16.2967	18.9015	15.173	14.3154	20.5234	13.57	9.09884	26.6041	14.4364	11.9623	18.4191
mnx2b	1	complement(5449777..5455502)	ENSDARG00000030350	-2.36971	-1.24471	0.716741	-4.55766	-2.18829	0.798476	-1.9233	-0.943585	0.86417	0.206388	0	0.365044	0.0888952	0	0.160469	0	0	0	0	0	0.0784243
fn1b	1	complement(5504128..5543065)	ENSDARG00000006526	-1.24506	-0.316213	0.677233	-1.38134	-0.466066	0.73805	-1.10946	-0.149853	0.874221	70.563	63.3201	42.2761	37.7537	32.8716	35.8527	35.3992	30.0686	47.4011	39.595	26.9833	30.1425
cpo	1	5576151..5587575	ENSDARG00000077688	-2.59436	-1.37538	0.842511	-3.00845	-1.58902	0.93592	-1.15961	-0.213643	0.982173	0.073976	0	0	0	0	0	0	0	0	0	0	0
nrp2a	1	complement(5606460..5746030)	ENSDARG00000096546	-1.14167	-0.191147	0.797268	1.20726	0.271741	0.900246	1.3783	0.462887	0.394772	4.26366	3.15977	2.99072	2.54276	2.02139	2.85603	2.14773	1.82456	4.06581	3.6643	3.88424	2.82483
pard3ba_1	1	complement(5798548..6028876)	ENSDARG00000092671	-1.44651	-0.532578	0.5258	-1.59936	-0.677498	0.588849	-1.10567	-0.14492	0.915883	3.30313	1.81567	2.41483	2.41862	1.12353	1.4382	1.81939	0.991321	2.6199	0.936803	0.838273	1.48106
pard3ba_2	1	complement(6068436..6085750)	ENSDARG00000113935	-1.16833	-0.224448	0.969314	-1.04231	-0.0597901	0.995172	1.1209	0.164658	0.982173	1.53534	0	0	0	0.191295	0.170535	0.604057	0	0.57989	0.188502	0	0.500063
abcb6a	1	6135176..6158609	ENSDARG00000063297	1.22183	0.289047	0.776814	1.00124	0.00178761	0.998778	-1.22032	-0.287259	0.803381	2.37678	1.71435	4.22763	3.15793	1.58105	3.00687	3.99402	2.418	2.87567	1.59259	3.28611	3.00027
cnppd1	1	6161930..6172328	ENSDARG00000027078	1.1389	0.187636	0.793262	1.00452	0.00650747	0.995172	-1.13377	-0.181128	0.821071	18.4386	16.7256	14.9511	15.7	14.4485	15.7735	12.7713	15.3011	17.2732	14.7264	14.1559	15.7059
prkag3a	1	6171585..6185532	ENSDARG00000017537	2.02012	1.01444	0.16234	1.54	0.62293	0.789616	-1.31177	-0.391513	0.751717	3.02823	1.84099	7.85562	2.60863	3.84846	3.83443	10.0873	6.01657	3.88872	4.68457	6.35196	6.57531
retreg2	1	6189949..6210718	ENSDARG00000063270	-1.45517	-0.541187	0.583414	1.00827	0.0118888	0.995172	1.46721	0.553076	0.593733	4.32682	1.67829	3.89026	1.39773	1.4623	1.34566	2.08534	1.02934	2.09724	1.95226	2.40203	3.8226
mdh1b	1	complement(6218632..6225285)	ENSDARG00000018008	4.98057	2.31631	0.533313	4.20303	2.07143	0.851849	-1.185	-0.244881	0.973172	0.0782102	0	0	0	0	0	0.35899	0.0572491	0	0.134432	0.0708869	0.178312
fastkd2	1	6225493..6243978	ENSDARG00000074031	-1.21771	-0.284172	0.797268	-1.36757	-0.451613	0.869916	-1.12306	-0.167441	0.897922	6.8595	4.26688	14.0894	6.48087	6.65803	5.2473	7.61747	1.33626	4.77764	5.75261	4.51248	6.22198
gtf3c3	1	6243906..6272146	ENSDARG00000043247	1.07862	0.109185	0.913608	1.23886	0.309018	0.901892	1.14857	0.199833	0.852268	5.39255	4.31365	2.48608	3.14347	2.12173	4.6341	2.97771	3.17564	5.1097	3.51944	4.52013	4.65282
LO018629.1	1	6307305..6329292	ENSDARG00000113848	-8.79232	-3.13624	0.200577	-1.62884	-0.703844	0.924046	5.3979	2.4324	0.420245	0.326442	0.192946	0.128308	0.0937366	0	0	0.0499465	0	0.0958964	0.0935179	0.147938	0.0826955
hecw2b	1	6357059..6366066	ENSDARG00000063253	-1.08162	-0.113187	0.954003	1.41779	0.503647	0.895779	1.53351	0.616834	0.607421	1.76118	1.24915	1.45369	0.83443	0.53761	0.821599	1.45511	0.966873	2.09534	1.21088	1.35683	2.20843
klf7a	1	complement(6403551..6494384)	ENSDARG00000073857	-1.07612	-0.105843	0.962525	-1.01743	-0.0249341	0.995172	1.05768	0.0809087	0.981806	0.40162	0.534105	0.662999	0.58815	0.315249	0.562074	0.331823	0.352778	0.637095	0.586777	0.400415	0.396785
si:ch211-93g23.2	1	6640437..6646356	ENSDARG00000070558	-1.28082	-0.357073	0.872761	-1.73863	-0.797952	0.901892	-1.35743	-0.440879	0.86417	3.25354	0.998496	0.737773	2.47933	0	0.389178	0.689261	2.93115	0.992528	0.752819	1.70128	0.380399
ube2f	1	6646529..6664123	ENSDARG00000025754	1.31437	0.394372	0.473155	1.29242	0.370075	0.789616	-1.01698	-0.024297	0.982173	22.5192	18.4946	24.1235	21.8671	29.6798	17.1181	22.288	19.8321	24.896	27.9505	24.8299	26.2057
erbb4a	1	6817292..6925407	ENSDARG00000063207	-9.70455	-3.27866	0.524816	2.65012	1.40606	0.74717	25.7182	4.68472	0.244777	0.0515411	0.0456956	0.0303874	0	0	0	0	0	0.0681336	0.0442958	0.0934299	0.117509
ERBB4	1	7189856..7448795	ENSDARG00000090408	1.04109	0.0581014	0.969314	-1.2126	-0.278108	0.960014	-1.26244	-0.336209	0.851689	0.291207	0.297899	0.316963	0.212263	0.214905	0.174166	0.20564	0.295145	0.138189	0.154013	0.304545	0.255356
lancl1	1	7517449..7539716	ENSDARG00000013741	1.27716	0.352945	0.495199	1.59319	0.671916	0.0980068	1.24744	0.318971	0.570524	11.1416	10.0218	14.4769	8.61936	10.8493	11.8166	9.97986	11.0852	14.9667	13.7588	16.471	20.305
mylz3	1	7538909..7554463	ENSDARG00000017441	1.70837	0.772621	0.105894	1.26138	0.335008	0.870801	-1.35436	-0.437613	0.520831	11184.8	9428.39	10745.8	10103.2	13443.8	11298.2	15449.8	14619	10372.8	11722.2	14515	11486.9
pcnp	1	7556965..7561222	ENSDARG00000037713	1.37808	0.462664	0.312912	1.10893	0.149174	0.937192	-1.24271	-0.31349	0.600582	24.5892	23.729	27.7677	24.6853	31.5088	29.3393	28.6507	20.2836	34.4222	21.1327	28.3728	21.2745
mxa	1	complement(7562316..7570181)	ENSDARG00000021688	-1.33403	-0.415794	0.693277	1.67072	0.740474	0.602647	2.2288	1.15627	0.0666669	16.9828	8.84281	6.56914	7.85664	6.70053	7.30077	5.44428	3.88065	29.3395	20.5418	2.60615	9.62858
mxb	1	complement(7574351..7603734)	ENSDARG00000004953	-2.81739	-1.49436	0.324811	4.57927	2.19512	0.113941	12.9016	3.68948	9.76937e-05	11.4704	3.98343	0.498628	9.01585	0.783723	1.72612	0.533776	3.28883	41.0403	54.9228	0.766549	3.73591
efnb2b	1	complement(7632119..7659870)	ENSDARG00000074050	-1.03084	-0.0438178	0.971195	1.25615	0.329005	0.93592	1.29488	0.372822	0.821071	2.17888	1.15906	1.74707	0.600629	0.608105	0.813166	1.44017	1.27593	1.8434	0.674131	1.97485	2.05329
arglu1b	1	complement(7662091..7673376)	ENSDARG00000018319	1.30862	0.388044	0.537976	1.06262	0.0876275	0.982781	-1.2315	-0.300416	0.694601	22.1661	14.2719	31.1839	19.1498	24.5694	21.754	27.4445	15.1967	25.8399	12.4622	26.112	21.7488
en1b	1	7679328..7683372	ENSDARG00000098730	1.88541	0.914877	0.0434529	1.10286	0.141256	0.96386	-1.70956	-0.773621	0.10299	4.67673	4.54758	6.31508	5.58821	7.89457	8.73861	7.82489	6.57057	6.04935	4.9269	4.37555	6.24847
radil	1	complement(7847787..7894255)	ENSDARG00000079779	1.41767	0.503522	0.747151	1.87398	0.906107	0.718767	1.32187	0.402585	0.821071	0.44226	0.15684	0.208597	0.203189	0.257148	0.137544	0.541334	0.194238	0.389757	0.38009	0.614634	0.358511
mmd2b	1	complement(7908282..7917062)	ENSDARG00000089090	3.57803	1.83916	0.797268	1.0556	0.0780585	0.995172	-3.38958	-1.76111	0.821071	0	0	0	0	0	0	0	0.122908	0	0	0	0
si:dkey-79f11.10	1	complement(7924956..7930679)	ENSDARG00000093857	-2.77716	-1.47361	0.0576903	1.42126	0.507168	0.901892	3.94705	1.98078	0.00230195	16.5355	14.6601	15.1137	61.3601	15.4456	5.09696	5.29946	5.01342	57.6002	24.3858	6.91716	64.0965
si:dkey-79f11.9	1	complement(7936270..7939514)	ENSDARG00000095309	-42.2461	-5.40075	0.230229	-1.70962	-0.773674	0.94626	24.7109	4.62707	0.356453	0	0	0	3.08084	0	0	0	0	0	0	0	1.84821
si:dkey-79f11.8	1	complement(7946842..7951002)	ENSDARG00000095673	-1.75729	-0.813352	0.5258	1.54143	0.624269	0.876444	2.70874	1.43762	0.11362	3.31032	4.40232	5.74025	18.8711	8.91614	1.5897	3.39644	1.06902	16.3886	7.86554	5.47123	19.904
CR855320.1	1	7956030..7961696	ENSDARG00000099359	-2.68469	-1.42475	0.238212	-1.86667	-0.900463	0.798273	1.43823	0.524292	0.815439	0.440527	0.204582	0.222621	0.180708	0.0365915	0.0163102	0.173319	0.0767766	0.12941	0.144229	0.0570397	0.175365
si:dkey-79f11.7	1	complement(7964276..7975769)	ENSDARG00000092361	-2.36666	-1.24285	0.691606	-1.0657	-0.0918019	0.995172	2.22076	1.15105	0.75318	3.43595	7.08207	0	0.094263	0.0190873	0	0.0401815	3.05975	4.95675	0.0564258	1.74555	3.62577
CR855320.2	1	7988052..7989314	ENSDARG00000103767	#N/A	#N/A	#N/A	#N/A	#N/A	#N/A	#N/A	#N/A	#N/A	0	0	0	0	0	0	0	0	0	0	0	0
si:dkey-79f11.5	1	complement(7993632..8000428)	ENSDARG00000075791	-1.05583	-0.0783817	0.960415	-1.2547	-0.327346	0.920559	-1.18835	-0.248965	0.832715	53.7745	58.7841	43.7567	75.0883	57.2002	47.4035	34.7817	34.6231	94.623	25.658	37.2201	23.1443
CR855320.3	1	complement(8001435..8012476)	ENSDARG00000107486	-2.25995	-1.17629	0.528991	1.00235	0.00338285	0.998858	2.26526	1.17967	0.54937	0.12471	0.0829243	0.0735258	0.913152	0.135959	0.0242407	0.0858639	0.159751	0.329715	0.348331	0.0847742	0.402796
si:dkeyp-9d4.2	1	complement(8017069..8020589)	ENSDARG00000029720	-1.56523	-0.64637	0.237056	1.31747	0.397772	0.830738	2.06214	1.04414	0.0112972	30.0971	32.3326	23.4287	42.754	16.3054	15.5788	18.3941	14.7895	63.9092	36.8901	18.0846	45.2361
si:dkeyp-9d4.3	1	complement(8022320..8101495)	ENSDARG00000100166	1.18716	0.247518	0.860055	1.54379	0.626472	0.836332	1.3004	0.378954	0.799925	0.294666	0.244919	0.152012	0.253837	0.20881	0.171829	0.270508	0.242655	0.275916	0.300728	0.500765	0.32191
SLC5A10	1	8110562..8163167	ENSDARG00000074212	-1.31606	-0.396227	0.906994	-1.35444	-0.437695	0.971445	-1.02916	-0.0414682	0.989763	0.248442	0.110132	0.146475	0.481539	0	0	0	0.500107	0.164211	0.160138	0.337768	0
si:dkeyp-9d4.4	1	complement(8127675..8141135)	ENSDARG00000062929	-1.05812	-0.0815084	0.917703	1.00914	0.0131216	0.995172	1.06779	0.09463	0.917308	14.0496	10.029	10.738	11.3658	7.72682	11.7662	7.88871	6.86073	16.6876	8.6107	8.27108	10.4894
grapb	1	complement(8165340..8192418)	ENSDARG00000022668	-2.43859	-1.28605	0.614384	-2.4335	-1.28304	0.854796	1.00209	0.00301011	0.999292	0.111241	0.262999	0	0.0958271	0.03234	0.0864908	0	0.0271424	0.0980351	0	0	0.0845397
cacna1hb	1	8304904..8404005	ENSDARG00000099708	-1.49566	-0.580779	0.908224	1.33432	0.416105	0.982781	1.99569	0.996884	0.841344	0.0192673	0.0170821	0	0	0.0168042	0	0	0	0.0339601	0	0	0.0146426
syngr3b	1	complement(8415983..8428761)	ENSDARG00000025034	-1.04768	-0.0671998	0.963464	1.2052	0.269278	0.93592	1.26267	0.336478	0.704026	2.57826	2.14814	2.52736	1.84638	1.46298	1.32836	2.48094	1.52345	2.57332	2.05565	2.50577	3.04533
myo15ab	1	8442071..8507230	ENSDARG00000078474	1.54131	0.624158	0.885291	-1.74184	-0.800613	0.963884	-2.68472	-1.42477	0.769789	0	0.014371	0.0191133	0	0	0	0	0.0355953	0	0	0.0146916	0
alkbh5	1	8508753..8516595	ENSDARG00000063003	1.0653	0.0912567	0.923434	-1.41861	-0.504475	0.644635	-1.51124	-0.595731	0.271059	12.5297	8.67017	7.56739	13.0313	7.3297	7.8411	12.9052	7.04649	5.58846	6.76307	8.10188	6.73522
mief2	1	8521323..8532009	ENSDARG00000002377	1.11065	0.151404	0.844395	-1.00583	-0.00838046	0.995172	-1.11712	-0.159785	0.86417	24.0435	12.769	17.0291	15.3899	13.6252	14.9307	10.8013	18.5213	14.5654	15.6584	19.0102	12.9491
smcr8b	1	8534698..8540050	ENSDARG00000015803	2.38502	1.254	0.213729	1.03262	0.0463121	0.995172	-2.30968	-1.20769	0.238899	1.4933	5.12306	2.14361	2.09736	6.42704	0.984371	13.3809	1.16437	1.83099	1.61818	2.38329	5.32891
zgc:112980	1	complement(8539671..8553298)	ENSDARG00000037739	-1.11477	-0.156744	0.85857	1.03036	0.0431487	0.995172	1.14861	0.199893	0.842797	4.46818	3.84715	3.09028	4.44123	2.58549	3.70788	2.72142	2.23286	4.01347	2.99083	3.54357	4.86497
ptcd1	1	complement(8555323..8566567)	ENSDARG00000076176	1.10623	0.145651	0.873757	-1.10672	-0.146288	0.964097	-1.22428	-0.291939	0.754611	4.51377	3.37234	6.27926	5.6359	4.06943	5.16566	4.05058	3.74952	4.42488	3.3998	4.50482	4.31682
AL928650.4	1	8579197..8586066	ENSDARG00000113858	-1.11317	-0.154674	0.962525	1.56772	0.648668	0.920212	1.74514	0.803342	0.691203	0.415299	0.138074	0.38768	0.0894387	0.045276	0.363262	0	0.265996	0.884494	0.0743583	0.219574	0.368218
si:ch211-160d14.15	1	8593560..8597015	ENSDARG00000100771	1.82843	0.870603	0.783874	-2.73697	-1.45258	0.901892	-5.00435	-2.32318	0.416477	0.141187	0.0417248	0.110987	0	0	0.292731	0	0.103348	0.0414754	0.0404467	0	0
SLC29A4	1	8601935..8610564	ENSDARG00000079873	-1.33578	-0.417687	0.895936	1.18725	0.247622	0.98775	1.58591	0.665309	0.838391	0.199128	0.117696	0.156535	0.114358	0	0.051608	0.182802	0.0971732	0.233985	0	0	0.40355
fbxl18	1	complement(8638162..8646941)	ENSDARG00000007443	1.39273	0.477911	0.570427	-1.18803	-0.248576	0.93592	-1.6546	-0.726486	0.282395	1.675	1.52516	2.82916	2.33985	1.89518	2.49906	2.95066	1.78942	1.67563	1.67298	1.60022	1.58258
actb1	1	complement(8649099..8653385)	ENSDARG00000037746	1.06508	0.0909685	0.92615	-1.10857	-0.148696	0.961394	-1.18072	-0.239665	0.792991	1167.11	1272.69	971.886	1039.55	1085.84	1195.17	785.101	705.545	1315.95	915.377	728.639	847.074
fscn1b	1	8662530..8670486	ENSDARG00000037747	-1.10557	-0.144797	0.942872	1.45626	0.542272	0.901892	1.61001	0.687068	0.60687	0.565943	0.250878	0.407814	0.270847	0.246797	0.317796	0.0865906	0.345221	0.44334	0.405322	0.655436	0.501783
abcg2b	1	complement(8673061..8691969)	ENSDARG00000079361	-1.05201	-0.0731549	0.979654	-4.57419	-2.19352	0.825626	-4.34803	-2.12036	0.605926	0	0.0722391	0	0.14038	0.0710637	0	0	0.089464	0	0	0	0.0309612
C1H3H16orf72	1	8694196..8702684	ENSDARG00000012458	-1.05586	-0.0784173	0.936232	-1.15954	-0.213557	0.93592	-1.0982	-0.13514	0.880809	77.5274	82.9461	88.1806	91.5003	67.8883	71.2379	59.0326	56.2014	76.9536	60.1967	63.9365	76.1721
grin2ab	1	complement(8763429..8928841)	ENSDARG00000070543	-1.62461	-0.700093	0.716741	-1.112	-0.153162	0.991841	1.46097	0.546931	0.821071	0.24138	0.0535009	0.0711558	0.0649792	0.065788	0.0703781	0.0553975	0.011043	0.119658	0.0777931	0.0136736	0.137581
socs1b	1	complement(8962624..8966046)	ENSDARG00000089873	-1.38577	-0.470685	0.646358	-1.04792	-0.067527	0.995172	1.3224	0.403158	0.735834	5.42603	5.46664	4.944	6.48013	3.33417	2.20528	5.3208	2.07617	7.71623	3.07353	3.01784	6.74774
si:ch73-191k20.3	1	complement(8978908..8980665)	ENSDARG00000094206	-1.18628	-0.24645	0.899338	-1.00954	-0.0137019	0.995231	1.17507	0.232748	0.919575	2.57235	3.25802	1.29994	12.3459	2.08325	3.42862	4.55424	3.22789	0.971562	3.47404	5.49565	8.51783
tlr2	1	8984068..8988504	ENSDARG00000037758	-1.00494	-0.00711569	0.99627	1.12924	0.175353	0.986036	1.13482	0.182468	0.947827	0.580608	0.12869	0.228208	0.458478	0.168794	0.225714	0.577423	0.141666	0.213201	0.291078	0.394681	0.551556
prkcba	1	9004719..9064912	ENSDARG00000008723	-1.79033	-0.840228	0.128941	-1.55124	-0.633419	0.541363	1.15413	0.206809	0.854354	22.3292	4.70521	10.059	10.3965	3.97722	6.78553	6.35166	3.10781	7.48334	3.88537	6.4492	9.97856
BX004779.3	1	9071324..9074479	ENSDARG00000110570	#N/A	#N/A	#N/A	#N/A	#N/A	#N/A	#N/A	#N/A	#N/A	0	0	0	0	0	0	0	0	0	0	0	0
cacng3a	1	9082417..9091935	ENSDARG00000058460	1.32788	0.409121	0.920086	-11.2396	-3.49052	0.794028	-14.9248	-3.89964	0.458269	0	0.15684	0	0.101595	0	0	0.270667	0.043164	0	0	0	0
si:ch211-14k19.8	1	complement(9100447..9114936)	ENSDARG00000088975	-1.02864	-0.0407344	0.969314	1.0923	0.127376	0.977151	1.12359	0.16811	0.878638	1.71386	1.82338	2.53531	2.04009	1.4404	1.28408	1.97383	1.48262	1.64771	1.68718	2.99379	1.89452
vap_1	1	complement(9105039..9109699)	ENSDARG00000100949	1.66586	0.736269	0.782968	-19.5363	-4.28809	0.563093	-32.5448	-5.02436	0.209548	0	1.17108	0	0.568929	0.960018	0.513499	0.404196	0.644582	0	0	0	0
vap_2	1	complement(9113630..9115034)	ENSDARG00000093053	-1.92019	-0.94125	0.730154	1.01996	0.0285173	0.995172	1.95852	0.969767	0.742807	0.945991	0	1.85911	0.814912	0	0	0.868432	0.461637	0.833688	1.35502	0.571608	0.479283
ndufab1a	1	complement(9118100..9123465)	ENSDARG00000058463	1.19141	0.252674	0.741018	-1.18378	-0.243406	0.93592	-1.41038	-0.49608	0.418601	227.336	271.594	301.906	259.466	247.941	225.496	271.238	248.23	210.066	207.193	238.36	180.345
palb2	1	complement(9125023..9134045)	ENSDARG00000076716	1.3765	0.461002	0.738661	-1.26686	-0.341255	0.93592	-1.74383	-0.802257	0.511973	1.12206	0.680655	0.83563	0.50873	1.33916	1.05608	0.596355	0.389055	1.0409	0.406034	0.321157	0.538568
rasd3	1	9144958..9145896	ENSDARG00000058464	4.20716	2.07285	0.463421	2.85737	1.51469	0.872221	-1.47239	-0.558157	0.864193	0.126602	0.112244	0	0	0	0.196869	0.348668	0.370686	0.557864	0.108805	0.114748	0
plk1	1	9153141..9161843	ENSDARG00000058471	-1.96171	-0.972113	0.281469	1.54558	0.628153	0.830738	3.03199	1.60027	0.0170349	5.33974	5.68927	1.32555	2.58237	2.24685	1.49315	1.63398	0.720012	11.8472	4.26708	1.57079	4.98356
ern2	1	complement(9169807..9195760)	ENSDARG00000058475	-3.0172	-1.59321	0.0234592	-1.97722	-0.983476	0.420189	1.52598	0.609735	0.632874	2.00742	0.7119	2.27237	2.28263	0.59527	0.499452	0.405425	0.352659	0.849174	0.345047	0.76417	1.46456
chtf18	1	9199031..9227204	ENSDARG00000058480	-1.37127	-0.455517	0.730154	1.20154	0.264884	0.952013	1.64764	0.720402	0.533174	1.21081	0.878307	0.605703	1.39072	0.704013	1.14111	0.33683	0.214861	1.77845	1.26134	0.665111	0.948063
gng13a	1	complement(9227081..9228007)	ENSDARG00000024740	1.42498	0.510943	0.747958	1.34583	0.428494	0.93592	-1.05881	-0.0824488	0.982173	2.07469	1.10363	1.46782	2.68082	1.08567	4.67795	1.33321	1.21492	4.02246	1.60474	1.31629	2.52272
si:dkeyp-57d7.4	1	complement(9230244..9231952)	ENSDARG00000101597	1.12664	0.172025	0.969314	-3.00858	-1.58908	0.93592	-3.38958	-1.76111	0.821071	0	0.0616716	0	0	0	0	0.0638578	0	0	0	0	0
zgc:136472	1	complement(9234928..9249943)	ENSDARG00000058445	-2.5944	-1.3754	0.842511	1.61003	0.687085	0.969484	4.17705	2.06248	0.766258	0	0	0	0.0603817	0	0	0	0	0	0.0602407	0.0635307	0
ubn1	1	complement(9258931..9278037)	ENSDARG00000063169	2.42792	1.27972	0.695775	2.09252	1.06524	0.93592	-1.16028	-0.214476	0.97387	0	0.0456856	0	0.0443898	0.0898847	0.0801299	0.0473052	0	0.0908251	0.0885724	0	0.0391612
uncx4.1	1	9290103..9294115	ENSDARG00000037760	3.35904	1.74805	0.446427	2.15216	1.10579	0.901892	-1.56077	-0.642262	0.828377	0.0625024	0	0.0736998	0.107684	0.163536	0	0.114756	0.366009	0.165247	0.0537162	0.0566499	0.237499
micall2b	1	complement(9459760..9486214)	ENSDARG00000017834	-1.17377	-0.231149	0.762537	-1.03578	-0.0507233	0.995172	1.13322	0.180426	0.844912	3.90545	4.19699	2.93053	4.58768	3.04492	3.26656	2.60746	1.75423	5.24095	2.79704	3.13751	3.28281
si:ch73-12o23.1	1	complement(9499645..9527200)	ENSDARG00000074282	-1.01517	-0.0217272	0.969314	1.15288	0.205243	0.91944	1.17037	0.22697	0.725899	8.70451	5.59668	7.38538	6.86114	5.63466	6.00094	5.20651	4.94567	8.54042	7.94713	6.72727	7.23358
elfn1b	1	9557212..9712302	ENSDARG00000074372	-1.8943	-0.921663	0.670426	1.1471	0.19799	0.98775	2.17295	1.11965	0.593652	0.166576	0.0984557	0.163682	0.0478315	0.0484269	0.0215857	0	0.10161	0.0978672	0.1193	0.050326	0.210987
ugt5b5	1	complement(9626277..9629724)	ENSDARG00000104203	3.28075	1.71402	0.514874	-1.05452	-0.0765879	0.995172	-3.45962	-1.79061	0.502329	0.0653184	0.0579103	0.0770203	0	0.0569681	0.253928	0	0.19125	0.115128	0	0.0592022	0
ugt5b2_1	1	complement(9629161..9652547)	ENSDARG00000101495	1.02899	0.0412342	0.969314	1.29556	0.373575	0.876	1.25905	0.332341	0.725396	3.55572	2.52196	1.53733	3.5395	2.13635	2.11953	2.35748	2.37139	3.1336	2.92006	3.7599	3.75311
ugt5b4	1	complement(9630996..9652696)	ENSDARG00000091916	1.33214	0.413745	0.730154	1.56394	0.645187	0.798104	1.17401	0.231442	0.868174	0.944851	0.913845	0.962197	0.517956	1.27355	0.601061	0.985667	0.628747	1.81677	0.7013	1.05101	1.3382
ugt5b2_2	1	complement(9635978..9652725)	ENSDARG00000099276	1.4839	0.569396	0.701109	-1.10437	-0.14322	0.990175	-1.63877	-0.712616	0.63453	0.405534	0.359541	0.478186	0.548967	0.606327	0.495482	0.638205	0.381661	0.714783	0.348527	0.367562	0.132083
ugt5b1	1	complement(9645275..9652725)	ENSDARG00000104995	-1.37782	-0.462387	0.728499	1.01595	0.0228258	0.995172	1.39979	0.485212	0.730542	1.19975	0.786198	1.23016	1.12338	0.454945	0.770587	0.478864	0.68729	0.827469	0.493133	1.37108	1.38748
mad1l1	1	complement(9739370..9858508)	ENSDARG00000033852	-1.10459	-0.143507	0.875784	1.06864	0.0957794	0.982781	1.18041	0.239286	0.811526	3.67638	2.19033	2.15017	2.96429	1.74428	2.49254	2.02498	1.52853	3.88793	2.6035	2.07925	2.43631
pmm2	1	9860381..9866856	ENSDARG00000037654	1.13408	0.181527	0.864469	1.06876	0.095933	0.98775	-1.06112	-0.0855939	0.96428	8.18682	7.56075	4.42452	7.34629	8.25588	8.75233	4.38411	3.55815	12.551	4.10432	4.71494	7.19388
C1H7orf26	1	complement(9873295..9885326)	ENSDARG00000037652	-1.28	-0.356145	0.717276	-1.12647	-0.171806	0.96386	1.1363	0.184339	0.877736	4.10614	1.99637	4.52939	3.30898	1.61732	2.88361	2.37113	1.50283	2.80156	2.73208	2.64118	3.12054
rgs11	1	9886991..9914630	ENSDARG00000037646	-4.11074	-2.0394	0.134828	-1.10508	-0.144151	0.991841	3.71985	1.89525	0.175722	0.775301	0.68737	0.228549	0.333937	0	0.200935	0	0.141878	0.512446	0.222105	0.351352	0.638306
pgap6	1	complement(9919909..9940494)	ENSDARG00000032795	-2.17499	-1.12101	0.0733414	-1.72995	-0.790729	0.482948	1.25726	0.330282	0.790663	11.562	2.8449	4.80469	4.29988	2.08785	2.7721	2.24438	1.11849	3.72564	1.22567	3.00069	4.45144
pdia2	1	9954489..9966195	ENSDARG00000018263	-1.28157	-0.357914	0.850589	1.40059	0.486034	0.93592	1.79496	0.843948	0.613774	0.732962	0.216611	0.0823118	0.300667	0.30441	0.108549	0.22429	0.153292	0.830506	0.509942	0.221443	0.159151
si:dkeyp-75b4.8	1	9966384..9982114	ENSDARG00000077542	-1.28499	-0.36176	0.759426	-1.18515	-0.245072	0.94626	1.08424	0.116687	0.954053	13.6563	6.05372	4.74826	4.52462	4.58094	6.53407	5.46469	1.15341	6.78901	3.91219	5.55402	6.12056
si:dkeyp-75b4.7	1	complement(9972565..9980810)	ENSDARG00000070490	3.09296	1.62899	0.436186	1.37414	0.458527	0.969301	-2.25083	-1.17046	0.641311	0.598587	0.21228	0.141165	0.515646	2.81915	0.186163	0.219805	0.350528	0	1.13177	0	0.636872
si:dkeyp-75b4.9	1	complement(9986675..9988840)	ENSDARG00000015678	2.48813	1.31506	0.44793	1.32167	0.40236	0.961722	-1.88256	-0.912699	0.680868	4.37476	6.23949	0.224283	0	6.96743	4.8803	6.8099	3.20228	5.36406	3.59632	4.48232	0
si:dkeyp-75b4.10	1	9994811..10000376	ENSDARG00000079043	1.07403	0.103038	0.969314	2.05925	1.04212	0.860759	1.91731	0.939084	0.689733	0.153989	0.409573	0	1.45917	0.805818	0.119728	0.70682	0.225437	0.542833	0.397027	2.09355	1.17027
trim2b	1	10003193..10033113	ENSDARG00000076174	-1.18356	-0.243134	0.921156	1.02069	0.0295473	0.995172	1.20805	0.272681	0.923466	0.261593	0.0773082	0.171365	0.100154	0.1014	0	0.106732	0.170208	0.0768461	0.0999201	0.158066	0.220892
rnf175	1	complement(10037444..10048514)	ENSDARG00000037647	1.69592	0.762068	0.0363077	1.29264	0.370316	0.76147	-1.31199	-0.391752	0.466137	20.017	22.556	22.522	23.8248	31.0513	30.5922	28.7561	28.3537	23.7678	31.1889	26.383	25.4312
fgb	1	10051763..10059496	ENSDARG00000008969	-1.63921	-0.713002	0.868123	-1.07615	-0.105882	0.995172	1.52322	0.60712	0.906728	0	0.229748	0	0	0.0565024	0	0.059473	0	0	0	0.117437	0.0984684
fga	1	complement(10063501..10071539)	ENSDARG00000020741	1.22408	0.291702	0.969314	5.11304	2.35418	0.901892	4.17703	2.06248	0.766258	0	0	0	0	0	0	0	0	0	0	0.0833318	0
si:ch73-132f6.5	1	10074343..10114016	ENSDARG00000104660	1.29827	0.376594	0.536135	1.07758	0.107796	0.97233	-1.2048	-0.268798	0.716883	4.79427	2.81563	3.81679	4.76129	3.67534	3.56139	5.60663	3.57641	3.84836	4.12032	4.06857	4.06122
lratb.1	1	10110203..10119029	ENSDARG00000096594	-1.3395	-0.421691	0.678796	-1.05683	-0.0797492	0.99406	1.26746	0.341942	0.775305	2.82515	2.83431	1.75331	2.36965	1.62104	1.56073	1.63802	1.03399	3.01393	1.72517	1.88677	2.20353
lratb.2	1	10118455..10124192	ENSDARG00000077652	-4.37204	-2.12831	0.734581	1.71349	0.776937	0.938282	7.49145	2.90524	0.616333	0	0.188714	0	0	0	0	0	0	0.187586	0.0914667	0.096462	0
rbm46	1	10127163..10137776	ENSDARG00000079452	-2.5944	-1.3754	0.842511	-3.0085	-1.58904	0.93592	-1.15961	-0.213643	0.982173	0	0	0	0.0426164	0	0	0	0	0	0	0	0
npy2rl	1	10221568..10235337	ENSDARG00000089943	-1.32097	-0.401596	0.911325	-2.74889	-1.45885	0.882486	-2.08096	-1.05725	0.812709	0.304234	0.0674324	0.0896845	0	0	0.118272	0	0.111348	0	0	0.0689367	0.0578022
eif3f	1	10297027..10304044	ENSDARG00000077533	1.09988	0.137346	0.868123	-1.0283	-0.040261	0.995172	-1.13101	-0.177607	0.85231	342.794	336.491	290.086	305.96	274.124	317.346	238.431	268.754	299.049	294.835	273.412	289.245
zgc:77880	1	10305611..10315206	ENSDARG00000030563	1.52392	0.60779	0.598571	1.7835	0.834713	0.627474	1.17034	0.226923	0.877736	0.763383	0.984442	0.900144	0.777171	0.847372	1.40291	0.764504	1.01598	1.77364	0.715715	1.3838	1.84592
pip4p1b	1	10318077..10325025	ENSDARG00000026387	-1.99307	-0.994993	0.345695	-1.24271	-0.313485	0.937885	1.60382	0.681508	0.621743	3.9073	1.29906	1.03664	1.93539	0.596363	0.911387	1.25543	0.429015	1.89389	0.839509	0.973893	2.37554
FRMD7	1	complement(10336681..10347307)	ENSDARG00000070495	1.22408	0.291702	0.969314	5.11249	2.35403	0.901892	4.17659	2.06233	0.766258	0	0	0	0	0	0	0	0	0.192056	0	0	0
dachb	1	10378706..10496809	ENSDARG00000034785	-1.26338	-0.337286	0.73394	-1.11575	-0.158016	0.970161	1.13231	0.17927	0.883454	1.65274	1.77929	1.39203	1.72882	1.26986	1.07085	1.11987	0.69131	1.14442	1.42041	1.67632	1.31585
cnpy3	1	complement(10462692..10473630)	ENSDARG00000070512	1.05454	0.0766136	0.940526	1.36099	0.444662	0.72172	1.29061	0.368048	0.600361	11.3935	6.35303	6.16812	7.96295	8.12457	7.24285	5.13103	5.50751	7.95697	10.962	10.1318	10.5103
trpc5a	1	complement(10486093..10620459)	ENSDARG00000070504	3.57803	1.83916	0.797268	1.0556	0.0780585	0.995172	-3.38958	-1.76111	0.821071	0	0	0	0	0	0	0	0.0185897	0	0	0	0
zgc:174945	1	complement(10636064..10640748)	ENSDARG00000062057	1.41647	0.502302	0.637062	1.375	0.459429	0.892254	-1.03016	-0.0428733	0.982173	1.19346	1.19612	0.734231	1.0281	1.40294	0.968275	1.66724	0.759656	1.60054	1.33786	1.17578	1.34078
si:dkey-31e10.1	1	complement(10642322..10647484)	ENSDARG00000067992	-1.19126	-0.252488	0.852316	-1.20999	-0.274994	0.942803	-1.01572	-0.0225065	0.9877	0.429278	0.489333	0.397716	0.713179	0.454628	0.286087	0.394084	0.246893	0.297249	0.342581	0.361291	0.582569
si:dkey-31e10.5	1	complement(10667447..10669436)	ENSDARG00000070502	1.18294	0.242376	0.898459	1.70767	0.77203	0.834337	1.44358	0.529655	0.764854	1.08637	1.65112	0.548996	1.4706	1.48891	1.44799	0.712356	0.908811	1.50448	0.800274	1.96929	3.65625
zgc:103678	1	10683843..10696603	ENSDARG00000037679	1.27294	0.34816	0.802986	1.15094	0.20281	0.972193	-1.106	-0.145349	0.945036	3.94076	0.931684	4.49186	3.73419	3.43697	2.04265	4.70297	2.59614	1.6207	4.28994	4.40517	2.99486
atp1b1b	1	10720294..10739221	ENSDARG00000076833	1.0242	0.0344951	0.969314	-1.39722	-0.482557	0.559344	-1.43103	-0.517052	0.282093	11.6323	8.92566	11.0715	7.99846	5.64132	8.80091	11.6843	5.84197	7.86096	6.27624	6.00439	6.1842
cnga3b	1	10771457..10776547	ENSDARG00000012297	2.10277	1.07229	0.760703	1.83236	0.873705	0.93592	-1.14757	-0.198587	0.979075	0.125202	0	0	0.053927	0.218393	0	0	0.0916468	0	0.107602	0.170218	0.0475749
si:ch73-222h13.1	1	complement(10783670..10806625)	ENSDARG00000087107	1.09656	0.132988	0.969314	-1.35872	-0.442246	0.979647	-1.48992	-0.575234	0.891093	0.0902996	0	0	0.0777875	0.0787558	0.0702088	0	0	0	0	0.0409222	0.068625
crfb15	1	complement(10809604..10821584)	ENSDARG00000099342	-1.63353	-0.70799	0.570427	1.22491	0.292674	0.939363	2.00092	1.00066	0.325961	1.63221	0.884336	1.71078	0.937366	0.790862	0.705033	0.665953	0.265503	2.07776	0.857247	1.39719	1.44717
dmd	1	complement(10824351..11075405)	ENSDARG00000008487	-1.05633	-0.07906	0.939813	-1.03907	-0.0552931	0.995172	1.01661	0.0237669	0.982173	5.9924	4.2216	8.37445	4.11054	3.14988	3.27081	5.60298	4.48976	3.89408	4.32637	6.0622	5.73472
knl1	1	complement(11086957..11104805)	ENSDARG00000070239	-2.03347	-1.02394	0.20784	1.43526	0.521313	0.868159	2.91856	1.54526	0.0136306	1.73041	0.920496	0.637632	0.503093	0.396165	0.269083	0.536134	0.237496	2.26842	0.799352	0.784192	1.26575
knstrn	1	11107688..11117930	ENSDARG00000074379	-1.37204	-0.456321	0.735398	1.59627	0.674706	0.815941	2.19015	1.13103	0.194478	3.49023	2.1567	1.49655	1.73108	1.93712	1.72689	0.485467	0.851606	6.43141	1.72704	2.20481	3.21512
sdk1b	1	complement(11124746..11519934)	ENSDARG00000062854	-1.10961	-0.150056	0.969314	1.22825	0.296606	0.98442	1.36288	0.446662	0.902245	0.0808704	0.0573588	0	0	0.0282128	0	0.0445441	0.0236785	0.014254	0.0278009	0.102617	0.0122918
si:dkey-26i13.7	1	complement(11595798..11596829)	ENSDARG00000092242	-1.54517	-0.627762	0.842511	1.00319	0.004601	0.998858	1.5501	0.632363	0.86417	0.230387	0	0.13583	0.595391	0	0.0895638	0.211498	0.168641	0.507591	0	0	0.437717
si:dkey-26i13.6	1	complement(11606010..11607062)	ENSDARG00000092200	1.10352	0.142108	0.969314	-9.34486	-3.22417	0.82942	-10.3122	-3.36628	0.564556	0	0.400368	0	0	0.196927	0	0	0.165278	0	0	0	0
si:dkey-26i13.5	1	complement(11615273..11616295)	ENSDARG00000093636	2.01202	1.00864	0.788616	1.24008	0.31043	0.991293	-1.62249	-0.698212	0.86417	0	0	0.548101	0	0	0.451759	0.426717	0	0.409645	0.199742	0	0
si:dkey-26i13.3	1	complement(11626252..11631634)	ENSDARG00000095482	3.69267	1.88467	0.183479	1.42709	0.513077	0.936928	-2.58755	-1.37159	0.420786	0.196171	1.65226	1.61921	0.675956	0.855462	0.305049	1.53074	8.54391	2.07459	2.52892	0.266703	0.819961
chst12b_1	1	complement(11641482..11642513)	ENSDARG00000094981	247.479	7.95116	0.0372981	1.0581	0.081479	0.995172	-233.889	-7.86968	0.0223538	0	0	0	0	0	0	0	8.43204	0	0	0	0
GNA12	1	11659861..11668782	ENSDARG00000037619	3.06205	1.6145	0.496647	-2.42952	-1.28067	0.912023	-7.43932	-2.89517	0.202249	0	0.0845881	0.337505	0.0821888	0.166424	0.667632	0.437933	0	0.168165	0	0	0
brat1	1	complement(11670879..11689525)	ENSDARG00000062585	1.38825	0.473265	0.531756	1.15149	0.2035	0.937962	-1.20561	-0.269765	0.79209	4.25054	2.28513	2.02614	4.01215	2.72121	3.5861	3.44543	3.74024	3.42714	2.09855	3.6886	4.36432
eif3bb	1	11690360..11707665	ENSDARG00000074213	-1.74629	-0.80429	0.847788	2.09559	1.06736	0.933637	3.6595	1.87165	0.593221	0	0	0.279376	0	0.0516602	0	0.0543762	0	0.156602	0	0.322117	0.0450148
si:dkey-26i13.8	1	11711226..11733130	ENSDARG00000062606	-7.92634	-2.98665	0.582184	-1.89786	-0.92437	0.93592	4.17647	2.06228	0.772213	0.0378356	0	0	0.0977791	0	0	0	0	0.033344	0	0	0.0287539
chst12b_2	1	11736420..11737595	ENSDARG00000077198	-1.26401	-0.338008	0.873184	-1.12385	-0.16845	0.990435	1.12471	0.169558	0.964368	1.11197	0.537739	0.357594	0.435405	0.35266	0.550178	0.1856	0.369977	0.534525	1.04253	0.183245	0.230471
ttyh3b	1	complement(11781544..11850353)	ENSDARG00000007678	1.0452	0.063783	0.952943	1.11943	0.162767	0.938804	1.07102	0.098984	0.92313	2.30416	2.05944	2.65068	2.06557	1.71551	1.52933	2.09805	2.002	2.01411	2.17345	2.69964	2.51986
iqce	1	complement(11854710..11878845)	ENSDARG00000089930	-1.34093	-0.423233	0.671787	1.485	0.570463	0.767685	1.99128	0.993696	0.110573	1.80172	0.874037	1.56331	0.937098	0.711572	0.607917	0.842605	0.771397	1.67771	1.51923	2.15681	1.65344
snx8b	1	11881559..11900420	ENSDARG00000078057	6.45663	2.69078	0.24818	2.13782	1.09614	0.93592	-3.02019	-1.59464	0.504457	0.0863636	0	0	0	0	0.134297	0.317132	0.0632173	0.0380555	0.0371116	0.0782768	0.0328169
grk4	1	complement(11902579..11973341)	ENSDARG00000070448	-1.16547	-0.220909	0.730154	-1.2038	-0.2676	0.873106	-1.03289	-0.0466908	0.97481	6.3659	4.84181	6.96327	4.61945	3.57227	4.22054	4.54532	2.93795	4.84186	3.49185	4.1	5.15042
tspan5b	1	11977426..11994710	ENSDARG00000070449	-1.01184	-0.0169839	0.986689	-1.18934	-0.250164	0.949537	-1.17542	-0.23318	0.870213	3.38999	1.06976	4.13281	2.32631	1.75392	1.60825	2.90107	1.93468	1.16464	1.23451	2.7601	3.14395
slc24a2	1	12009673..12044390	ENSDARG00000042988	1.0558	0.0783341	0.969314	1.2579	0.331017	0.956235	1.19142	0.252683	0.909073	0.126737	0.187272	0.149442	0.145568	0.257915	0.0656929	0.135738	0.0618469	0.241999	0.163382	0.248885	0.0802637
si:dkey-58j15.11	1	12046544..12048509	ENSDARG00000096506	-3.07074	-1.61859	0.406551	-2.1874	-1.12922	0.846577	1.40383	0.489371	0.878039	5.32908	0.726874	1.93347	2.11877	1.07257	0.956171	0.376321	0	0.361265	2.81844	0.371545	0.311534
saraf	1	12049229..12058439	ENSDARG00000070452	-1.02195	-0.03133	0.969314	1.13567	0.183546	0.93592	1.1606	0.214876	0.766258	15.4706	12.6332	9.76118	13.1516	10.1788	11.8703	9.219	8.09591	15.3084	12.8877	11.316	15.0059
pla2g12a	1	complement(12061284..12064799)	ENSDARG00000070454	1.23559	0.305197	0.781438	1.14405	0.194151	0.961394	-1.08001	-0.111046	0.946946	2.37908	2.17517	2.98062	3.33032	2.7882	2.31219	2.59353	2.77545	2.35873	1.91685	3.30185	4.06806
si:dkey-58j15.10	1	complement(12065156..12068520)	ENSDARG00000096515	10.8723	3.44258	0.550516	1.05638	0.0791304	0.995172	-10.292	-3.36345	0.558991	0	0	0	0	0	0	0	0.159594	0	0	0	0
xpa	1	12068800..12097818	ENSDARG00000038114	1.49994	0.584902	0.344329	-1.33584	-0.417751	0.837555	-2.00368	-1.00265	0.0280803	5.10525	4.82015	6.33259	5.36881	7.86433	6.39225	6.39095	4.85324	3.03841	3.98872	4.44693	3.52713
mttp	1	complement(12105901..12126625)	ENSDARG00000008637	1.11859	0.161687	0.911398	-1.21466	-0.280554	0.938804	-1.35871	-0.442241	0.748608	0.581436	0.622887	0.542768	0.521741	0.443717	0.263709	0.489286	0.74481	0.597813	0.291493	0.32937	0.552342
spink4	1	12135129..12138612	ENSDARG00000091609	-1.45546	-0.541471	0.849846	1.08223	0.114007	0.995172	1.57514	0.655478	0.842736	4.69261	0	0.922217	1.0106	1.36424	0.912137	0	0.858736	4.82479	0.33608	0	1.48593
b4galt1	1	complement(12141876..12161148)	ENSDARG00000002634	-1.99846	-0.998888	0.19403	-1.00356	-0.00512594	0.997534	1.99137	0.993762	0.188714	5.50466	2.34632	4.36883	4.46835	1.47721	1.15229	2.33232	1.47226	5.97068	2.36543	1.91893	5.39012
stra6l	1	12172322..12193239	ENSDARG00000062467	-2.54833	-1.34955	0.570039	-1.40387	-0.489412	0.947069	1.81522	0.860141	0.788951	0.0234708	0.124853	0.0553512	0.0606558	0	0.0364975	0	0.0343608	0.0413689	0.0605143	0.0212731	0.0535112
tdrd7a	1	12195700..12228116	ENSDARG00000032808	3.57804	1.83917	0.798571	7.14167	2.83626	0.870801	1.99597	0.997091	0.839735	0	0	0	0	0.0265036	0	0	0	0.0267809	0.0522333	0	0
tmod1	1	12231478..12257979	ENSDARG00000078318	1.11445	0.156335	0.913748	1.1023	0.140522	0.982781	-1.01102	-0.0158133	0.990552	7.13652	1.66504	4.87187	2.5076	2.04743	2.62834	4.05154	4.46778	4.38597	1.61403	4.76611	5.42354
cplx2l	1	complement(12262980..12278581)	ENSDARG00000018997	1.24989	0.321796	0.621127	1.18728	0.247662	0.911211	-1.05273	-0.0741336	0.950466	9.92521	8.99729	10.5856	9.99095	7.19743	7.63023	11.159	12.0406	11.5971	10.7823	9.50123	11.9499
gne	1	12295142..12334540	ENSDARG00000099771	1.1528	0.205143	0.82966	1.00161	0.00232107	0.998384	-1.15095	-0.202822	0.851813	2.75538	1.95431	1.91331	1.60877	1.46858	2.40418	1.96737	1.5463	2.77903	1.68395	1.55392	1.69847
nansa	1	12335816..12344792	ENSDARG00000045620	1.24723	0.318731	0.547484	1.01416	0.0202793	0.995172	-1.22982	-0.298451	0.604139	22.263	23.7009	17.1294	20.8073	20.8413	26.6663	19.8065	15.9817	23.5593	20.9803	16.283	19.3363
clta	1	12348213..12361930	ENSDARG00000045618	-1.01547	-0.0221472	0.970135	1.05428	0.0762611	0.982781	1.07059	0.0984083	0.914219	48.7082	45.514	32.8491	47.619	38.3554	45.9765	28.952	23.6624	54.4293	40.3553	39.145	39.4801
sclt1	1	complement(12364456..12397258)	ENSDARG00000057248	-1.50699	-0.591668	0.350873	1.0211	0.0301254	0.995172	1.53879	0.621793	0.313882	4.81293	2.70248	5.06037	3.62779	1.53914	2.46355	2.31963	1.93766	5.30196	3.34356	2.72642	3.96249
C1H4orf33	1	12394205..12400783	ENSDARG00000017985	-1.10947	-0.149877	0.875999	1.13249	0.179504	0.950645	1.25647	0.329381	0.716915	2.38095	2.38409	1.61844	1.95452	1.68569	1.80765	1.13144	1.29175	2.64139	1.92589	1.62485	2.74611
pcdh10a	1	12763461..12797410	ENSDARG00000099729	1.0391	0.0553361	0.967204	1.22224	0.289522	0.901892	1.17624	0.234186	0.784423	2.84601	3.79641	4.5566	2.63159	2.32277	3.73536	2.39695	2.82863	3.77372	3.88208	3.54979	4.64324
si:dkey-5n7.2	1	13087797..13089102	ENSDARG00000102339	1.47949	0.565097	0.787331	1.14973	0.201296	0.986239	-1.28681	-0.3638	0.874222	1.16549	0	0.412285	1.90759	0.914841	0.453088	0.962938	1.53562	1.74611	0.300495	1.16199	0.620013
pcdh18a	1	complement(13260809..13271569)	ENSDARG00000089805	1.22664	0.294716	0.734657	1.36088	0.444538	0.822432	1.10943	0.149822	0.888659	2.14951	1.04314	2.08104	1.65676	1.26297	1.21387	2.09791	1.88811	2.11368	1.8668	2.39941	2.2526
noctb	1	13930625..13952084	ENSDARG00000078525	1.92938	0.948139	0.0924139	1.40779	0.493427	0.810834	-1.37051	-0.454712	0.596771	3.77814	3.42754	4.86941	4.01152	6.74354	4.30383	6.21082	6.68879	3.48448	4.22869	5.33564	8.01284
elf2b	1	complement(13957235..13989643)	ENSDARG00000079626	-1.06487	-0.0906747	0.899711	-1.11007	-0.150649	0.93592	-1.04245	-0.0599743	0.956251	16.4341	14.1794	12.3991	14.2112	9.96731	13.3896	10.6358	8.41149	15.2877	11.2017	10.0158	11.987
hpf1	1	14020445..14026780	ENSDARG00000057114	1.1733	0.230572	0.730154	1.08065	0.111894	0.969484	-1.08574	-0.118678	0.885284	8.13624	6.18297	6.9289	7.34262	6.02606	8.28405	6.69855	5.24664	8.59304	6.38205	7.37439	6.72311
ank2a	1	14073891..14158563	ENSDARG00000009026	-1.83442	-0.875328	0.477276	1.03258	0.0462493	0.995172	1.89418	0.921577	0.460128	0.441384	0.057974	0.520459	0.133783	0.0285154	0.101683	0.195095	0.137612	0.273731	0.14752	0.333379	0.310591
camk2d2	1	complement(14163506..14234076)	ENSDARG00000014273	1.07319	0.101908	0.962726	1.18273	0.242126	0.961394	1.10207	0.140218	0.946336	0.841012	0.570187	0.933346	1.74727	0.733497	1.077	1.1808	0.543187	0.653975	1.06292	1.12097	1.69185
cxcl8a	1	14253118..14254166	ENSDARG00000104795	-1.38498	-0.469862	0.641531	-1.05495	-0.0771786	0.995172	1.31283	0.392683	0.738764	8.79974	9.56814	4.30711	9.29675	4.19941	4.00185	6.24924	4.01063	11.4131	6.2785	6.16993	5.29956
pde5aa	1	complement(14257158..14258409)	ENSDARG00000056806	-1.6277	-0.702838	0.86204	1.75771	0.813694	0.93592	2.86102	1.51653	0.670567	0.450301	0.199615	0.265487	0	0.196367	0	0	0.164808	1.19053	0	0.204068	0.171108
ppp2r2ca_1	1	14283692..14306838	ENSDARG00000056797	1.086	0.119026	0.969314	1.03221	0.0457334	0.995172	-1.05212	-0.073293	0.982173	0.195848	0.130227	0.288667	0.0421776	0.17081	0.0380683	0.314634	0.0358396	0.0431494	0	0.266264	0.297676
wfs1a	1	complement(14313850..14332283)	ENSDARG00000062341	-1.14436	-0.194539	0.842511	1.05254	0.0738715	0.991841	1.20448	0.268411	0.801158	11.5816	3.90634	18.8024	7.69952	5.96546	4.20877	9.32234	8.07832	8.65352	8.61921	11.9424	10.747
crmp1	1	14348399..14364710	ENSDARG00000056742	-1.89314	-0.920779	0.610761	-1.00445	-0.00641235	0.997847	1.88474	0.914366	0.63773	0.21362	0.0946961	0.692698	0.368041	0.0465777	0.0830457	0.245133	0.156368	0.28239	0.275386	0.242022	0.405862
BX530018.1	1	14372680..14373891	ENSDARG00000037576	5.93204	2.56853	0.681487	5.11304	2.35418	0.903469	-1.16018	-0.214349	0.982173	0	0	0	0	0	0	0.0900437	0.0717975	0	0	0.177802	0
fip1l1b	1	14382584..14404555	ENSDARG00000070431	1.21503	0.280997	0.64656	-1.02896	-0.0411835	0.995172	-1.25022	-0.32218	0.603237	13.7799	13.835	10.8031	13.3142	11.1737	16.5922	12.0005	10.1413	14.1133	12.2909	8.50642	12.4818
chic2	1	14406098..14416435	ENSDARG00000022690	-1.01132	-0.0162355	0.973461	1.09824	0.135191	0.93592	1.11067	0.151427	0.821071	17.3119	16.1215	15.7139	15.3423	12.872	14.3317	12.5769	10.3018	19.5374	14.1826	14.9007	17.8418
BX530018.2	1	complement(14417785..14426804)	ENSDARG00000056677	1.68024	0.748664	0.291549	1.38296	0.467764	0.855413	-1.21495	-0.2809	0.815242	2.3435	2.14068	2.67961	3.42581	2.60134	2.53989	5.21544	3.63877	2.8789	3.96711	3.47574	3.29213
slc34a2a	1	14432434..14442902	ENSDARG00000012903	1.10836	0.148423	0.969314	1.33424	0.416021	0.982781	1.2038	0.267598	0.974521	0	0	0.10721	0	0.0396489	0	0	0.0332767	0.0400638	0	0.0412038	0.0345487
rbpja	1	14454663..14464020	ENSDARG00000003398	1.12516	0.170129	0.797268	-1.00765	-0.0109962	0.995172	-1.13377	-0.181125	0.803967	6.19959	4.28642	5.01898	4.62317	3.81317	4.76628	5.26659	3.82685	5.74903	3.35988	4.19335	5.32681
stim2a	1	14466860..14488074	ENSDARG00000074867	1.2837	0.360306	0.623999	1.10667	0.146219	0.962177	-1.15997	-0.214087	0.822222	8.56939	4.84088	10.6948	5.85334	8.32048	5.76655	6.16814	8.77069	6.99069	4.6926	10.9838	7.75734
si:dkey-194g4.1	1	complement(14497458..14506759)	ENSDARG00000109597	-1.46521	-0.551106	0.665855	-1.3496	-0.432535	0.933454	1.08566	0.118571	0.964598	0.831002	1.45304	0.571595	0.815281	0.724767	0.646112	0.508581	0.185865	0.427204	0.912571	0.188298	1.05256
CR847936.6	1	complement(14522913..14533611)	ENSDARG00000110922	-1.32845	-0.409747	0.670629	1.19821	0.260883	0.93592	1.59177	0.67063	0.392914	1.29332	1.11523	1.29523	0.48838	0.448104	0.785172	0.487927	0.68733	1.4989	0.791766	1.23645	1.15792
CR847936.1	1	14658801..14660280	ENSDARG00000039063	-1.15439	-0.207135	0.885324	1.20908	0.273908	0.941498	1.39575	0.481043	0.716176	4.30926	2.07637	0.773238	2.09818	1.30726	2.54929	1.28999	1.09716	2.55932	3.05941	1.95288	2.70536
CU138548.5	1	complement(14672440..14694809)	ENSDARG00000113383	-2.59456	-1.37549	0.842511	-3.00868	-1.58913	0.93592	-1.15961	-0.213643	0.982173	0	0	0.0958803	0	0	0	0	0	0	0	0	0
pcdh7a	1	15137901..15203357	ENSDARG00000078898	1.14589	0.196471	0.818995	-1.02387	-0.0340331	0.995172	-1.17325	-0.230504	0.810774	1.92812	1.20502	1.78902	1.19806	1.43352	1.26566	1.45085	1.2494	1.46245	1.05944	1.43244	1.53737
itln1	1	15204633..15224338	ENSDARG00000007534	5.97647	2.57929	0.692839	18.0753	4.17595	0.653111	3.02441	1.59666	0.644297	0	0	0	0	0.0473218	0	0	0.0397164	0	0.233154	0.0983551	0.0412345
hgsnat	1	15226268..15257315	ENSDARG00000077804	-1.28627	-0.36319	0.509946	1.09289	0.128145	0.956388	1.40574	0.491335	0.283525	4.37533	2.97456	3.4703	2.56906	1.62565	2.37978	2.52164	1.57981	3.75217	2.83286	3.30766	3.65316
pi4k2b	1	15258641..15285455	ENSDARG00000013881	1.12883	0.174835	0.849157	-1.08357	-0.115797	0.979336	-1.22318	-0.290632	0.766258	3.72761	5.017	3.12446	3.86881	3.56443	4.81878	3.25709	2.62995	4.94743	2.97203	2.1167	3.9592
dlc1	1	complement(15293531..15329277)	ENSDARG00000079317	-1.34592	-0.428593	0.754959	-1.23563	-0.305252	0.938134	1.08925	0.123341	0.962007	2.47264	0.597875	2.72629	0.71923	0.588147	0.424448	1.44449	1.10477	1.1603	0.469168	1.33885	1.83032
SGCZ	1	complement(15623961..15797663)	ENSDARG00000106258	1.22408	0.291702	0.969314	5.11262	2.35406	0.901892	4.17669	2.06236	0.766258	0	0	0	0	0	0	0	0	0	0	0.0784764	0.065801
tusc3	1	16073887..16220235	ENSDARG00000078854	1.09532	0.131354	0.927003	1.84959	0.887207	0.405062	1.68863	0.755853	0.36258	2.61388	1.29776	2.46573	2.34177	1.91497	2.03232	2.59155	0.994936	4.14644	3.4146	3.41155	3.97295
fgf20a	1	complement(16393077..16394814)	ENSDARG00000007356	-2.57585	-1.36505	0.658733	-1.89858	-0.924918	0.93592	1.35673	0.44013	0.933775	0.859111	0	0	0.185018	0.0936603	0	0	0.157215	0.0946403	0.184586	0.0973334	0.0816123
micu3a	1	16396870..16458257	ENSDARG00000078599	-1.01288	-0.0184573	0.98579	-1.40437	-0.489922	0.884496	-1.38652	-0.471464	0.701478	0.711002	0.546315	0.475081	0.898309	0.537426	0.386967	0.543924	0.572491	0.355071	0.285159	0.644426	0.486306
vps37a	1	16463079..16480213	ENSDARG00000017119	-1.32462	-0.405575	0.438454	-1.09087	-0.12548	0.961394	1.21427	0.280095	0.68173	11.7906	13.4981	13.498	16.2215	8.38641	8.76682	8.45951	7.28996	13.5687	11.117	9.38969	13.7453
mtmr7b	1	complement(16484211..16507812)	ENSDARG00000070412	1.35141	0.434463	0.754185	1.1855	0.245494	0.963155	-1.13995	-0.188969	0.919575	0.78663	0.479473	0.347834	0.465873	0.385913	0.535161	0.63187	0.647781	0.563262	0.422532	0.668412	0.672542
mtus1b	1	16548733..16619858	ENSDARG00000034105	-1.48783	-0.573209	0.116103	-1.334	-0.415754	0.553683	1.11532	0.157455	0.822408	7.41883	5.55032	8.69538	7.06257	3.45866	4.38245	3.7223	3.44095	5.69385	3.8294	4.26065	6.34919
pcm1	1	16621345..16654161	ENSDARG00000062198	1.19035	0.251391	0.699471	1.25899	0.332266	0.836299	1.05766	0.0808754	0.936145	3.9558	4.96467	7.16837	5.31066	4.51051	5.23263	5.91098	4.5001	7.36477	5.5779	5.80492	6.74137
asah1b	1	complement(16654254..16665044)	ENSDARG00000034817	-1.15517	-0.208103	0.754709	1.29387	0.371692	0.764525	1.49464	0.579795	0.166544	42.9784	30.9595	22.0905	31.2087	21.6855	24.2588	20.0435	19.6624	48.2559	32.4381	27.967	46.2193
frg1	1	complement(16673841..16689023)	ENSDARG00000056504	1.02444	0.0348391	0.969314	1.01063	0.0152522	0.995172	-1.01367	-0.0195869	0.982173	9.04661	8.02059	7.50855	7.11214	6.05163	8.22889	6.36979	4.88616	9.83035	6.03876	7.04522	7.24227
fat1a	1	17376922..17524922	ENSDARG00000017591	-1.22756	-0.295789	0.592477	-1.12828	-0.174124	0.93592	1.08799	0.121665	0.868338	6.91134	4.11932	5.79541	4.32768	3.22285	3.7988	3.35896	2.92276	4.52337	4.08673	3.96118	4.66207
casp3a	1	17527342..17536307	ENSDARG00000017905	-1.15343	-0.205926	0.747965	-1.15157	-0.203602	0.935742	1.00161	0.00232396	0.99777	33.2163	27.2651	25.6741	29.2983	19.3018	20.5743	25.2407	14.1347	25.6665	20.7273	21.2111	26.3002
acsl1a	1	complement(17537451..17587552)	ENSDARG00000030514	-1.03814	-0.054003	0.969314	-1.56291	-0.644236	0.37197	-1.50549	-0.590233	0.274217	32.1351	25.4927	38.3418	30.2886	23.6588	20.5773	32.0677	19.1121	18.3499	16.9989	18.6416	21.0985
helt	1	17593392..17595045	ENSDARG00000056400	1.6484	0.721069	0.833825	1.88622	0.915498	0.93592	1.14427	0.19443	0.976879	0.125005	0.332482	0.1474	0	0	0.291577	0.114756	0.366009	0	0.214865	0.793098	0.0949998
si:dkey-256e7.5_1	1	complement(17618015..17650223)	ENSDARG00000042937	-1.74606	-0.804101	0.637919	-1.80807	-0.854449	0.854796	-1.03551	-0.0503475	0.982173	1.03749	2.29957	0.815575	0.595824	0.754051	0.201665	0.714325	0.50629	0.304776	0.89165	1.09707	0.131411
si:dkey-256e7.5_2	1	complement(17652388..17675037)	ENSDARG00000092600	-1.03767	-0.0533485	0.977892	-1.69689	-0.762894	0.920212	-1.63529	-0.709545	0.790255	0.432919	0.383819	0.204191	0.596692	0.377575	0	0.715366	0.190135	0	0.372062	0.235429	0.263204
slc25a4	1	17676745..17679089	ENSDARG00000027355	1.37232	0.456618	0.472171	-1.03101	-0.0440619	0.995172	-1.41488	-0.50068	0.420383	3158.1	2001.8	3428.96	3654.74	3529.6	3107.87	3146.97	3212.04	2867.06	3038.26	2646.81	2350.29
si:dkey-256e7.8	1	complement(17677373..17715493)	ENSDARG00000092022	-4.37235	-2.12841	0.730154	-5.07023	-2.34205	0.901892	-1.15961	-0.213643	0.982173	0	0	0.178911	0	0	0	0	0	0	0	0	0
cfap97	1	complement(17681044..17693273)	ENSDARG00000056381	1.75685	0.812989	0.182602	-1.63503	-0.709321	0.507231	-2.8725	-1.52231	0.000645937	2.98222	4.19928	3.44754	3.97943	3.51896	4.7738	7.30058	4.87955	1.90673	2.06045	1.43099	3.0663
ankrd37	1	17695426..17698773	ENSDARG00000056376	2.34099	1.22712	0.390464	-2.16745	-1.116	0.811425	-5.07398	-2.34312	0.0359002	0.331448	1.37133	0.521104	0.380696	0.963587	0.429507	2.83989	0.889595	0.389468	0.284856	0.40055	0.0839636
ufsp2	1	complement(17699471..17711676)	ENSDARG00000056369	-1.06894	-0.0961867	0.902003	1.02836	0.0403501	0.995172	1.09926	0.136537	0.86417	12.348	9.1766	11.4911	12.8791	9.13288	9.5536	8.44614	6.60172	13.2292	9.67582	13.4411	7.54407
pdlim3a	1	complement(17721853..17735861)	ENSDARG00000011023	1.35066	0.433665	0.842511	2.57696	1.36567	0.522447	1.90793	0.932008	0.579592	0.0790422	0.350388	0.466014	0.47663	0.5515	0.491648	0.362809	0.115716	1.11454	1.35862	0.143282	0.780906
sorbs2a	1	complement(17747656..17803614)	ENSDARG00000003046	1.13691	0.185115	0.930301	-1.10246	-0.140721	0.991841	-1.25339	-0.325835	0.86875	0.439051	0.114487	0.365441	0.155736	0.135149	0.220884	0.308218	0.245762	0.159324	0.0665881	0.468164	0.176646
tlr3	1	17892944..17898227	ENSDARG00000016065	-1.86878	-0.902094	0.074578	1.09943	0.136751	0.969484	2.05458	1.03885	0.0224575	6.16774	2.90083	3.28159	4.17923	1.47602	1.78368	1.96792	1.59667	3.8778	3.71697	4.80622	4.28716
cyp4v8	1	17900306..17912645	ENSDARG00000062132	1.09899	0.136172	0.969314	1.66754	0.737724	0.93592	1.51735	0.601552	0.86413	0.0956392	0.0423961	0.112773	0.0411936	0.125119	0	0	0.10501	0.0842854	0	0.260052	0.109024
CR392335.1	1	18234470..18315145	ENSDARG00000115616	#N/A	#N/A	#N/A	#N/A	#N/A	#N/A	#N/A	#N/A	#N/A	0	0	0	0	0	0	0	0	0	0	0	0
mtnr1aa	1	complement(18251335..18336878)	ENSDARG00000037545	2.60919	1.3836	0.7451	2.24867	1.16907	0.93592	-1.16033	-0.214531	0.97945	0	0	0	0.0488818	0.0494902	0	0.104184	0	0.100016	0	0.051431	0
klhl5	1	complement(18363833..18446161)	ENSDARG00000062122	1.55446	0.636415	0.712175	-3.03613	-1.60223	0.5463	-4.71955	-2.23865	0.0776162	0.387387	0.0429315	0.228394	0.208569	0.253398	0.263548	0.311174	0.212673	0.0853497	0.0416164	0.0877784	0.0368003
si:dkey-192k22.2	1	18550864..18563321	ENSDARG00000095111	1.17811	0.236477	0.938698	1.42724	0.513226	0.937382	1.21146	0.276749	0.93281	0.793588	0.140717	0.935761	0.136725	0.138427	0.123404	1.01993	0.464719	0.559502	0.272813	0.575423	1.08559
fam114a1	1	complement(18575747..18592068)	ENSDARG00000008287	-1.16431	-0.21948	0.76381	1.19463	0.256568	0.901892	1.39093	0.476048	0.382625	8.99572	7.09446	6.41373	6.5328	3.87724	5.61167	5.32942	4.63231	7.51297	7.14684	9.85992	7.67116
klf3	1	complement(18594146..18615063)	ENSDARG00000015495	-1.53073	-0.614224	0.136041	-1.49443	-0.579593	0.291561	1.0243	0.0346313	0.982173	24.7269	21.0145	27.6041	20.7335	9.73015	16.1255	13.3646	9.31768	20.5343	12.8889	10.6753	15.3169
tbc1d1	1	complement(18642117..18772311)	ENSDARG00000062081	-1.18714	-0.247491	0.678796	-1.29734	-0.375554	0.718367	-1.09283	-0.128063	0.86417	15.4373	9.88047	10.1038	11.7747	7.27855	8.70494	8.37059	6.59898	10.9715	8.55953	6.4901	7.76472
pgm2	1	complement(18779168..18803919)	ENSDARG00000018178	-1.00536	-0.00771338	0.989021	-1.15071	-0.202523	0.93592	-1.14457	-0.19481	0.793161	8.05904	6.9917	5.5875	6.46563	6.30478	6.31976	4.73111	3.92432	6.7975	4.48863	4.20083	6.75549
tmsb5	1	complement(18810891..18811517)	ENSDARG00000093886	#N/A	#N/A	#N/A	#N/A	#N/A	#N/A	#N/A	#N/A	#N/A	0	0	0	0	0	0	0	0	0	0	0	0
slc25a51a	1	18811679..18816806	ENSDARG00000056163	-2.5944	-1.3754	0.842511	2.88748	1.52981	0.900246	7.49126	2.90521	0.604957	0	0	0	0.0755773	0	0	0	0	0.0773187	0.150802	0	0.0666751
zgc:195282	1	complement(18841462..18849029)	ENSDARG00000079488	-1.21493	-0.280871	0.811902	1.0537	0.0754591	0.995172	1.28017	0.356331	0.775259	5.97846	3.15987	6.23611	4.15968	4.11118	2.14537	4.64396	1.68315	7.09253	2.47022	3.95979	5.76669
rnf38	1	18863060..18933671	ENSDARG00000062055	-1.35944	-0.443012	0.703424	-1.03872	-0.0548092	0.995172	1.30876	0.388203	0.774629	3.0943	0.556086	3.00767	1.40481	0.91173	0.910319	1.68901	0.948849	1.36348	1.18591	2.12237	2.25624
limch1a	1	18965750..19066327	ENSDARG00000074275	-1.0027	-0.00389305	0.99709	1.44619	0.532256	0.871445	1.4501	0.536149	0.672835	3.02878	0.640803	4.46423	1.68999	1.26075	1.12393	3.19121	1.81394	1.66826	2.15932	4.02417	4.91744
phox2ba	1	complement(19074326..19079957)	ENSDARG00000075330	-3.97651	-1.9915	0.632386	-13.6239	-3.76806	0.73956	-3.42608	-1.77656	0.835616	0	0.725207	0	0	0	0	0.125153	0	0	0	0	0
exosc9	1	19083501..19092155	ENSDARG00000006392	1.20037	0.26348	0.776693	1.14433	0.194498	0.940673	-1.04898	-0.0689814	0.972736	4.77907	4.91801	6.1384	4.77852	4.98686	7.43155	3.83885	3.24836	6.99448	3.96058	4.71833	6.55048
ptpn9b	1	19094548..19112934	ENSDARG00000073902	1.22222	0.289506	0.768798	-1.01099	-0.0157648	0.995172	-1.23565	-0.305271	0.775305	4.4081	2.01579	4.21297	2.79801	2.2258	2.34502	4.34487	3.53237	3.72123	1.55525	3.15422	3.91424
ptprdb	1	complement(19122920..19237612)	ENSDARG00000019945	-2.01589	-1.01142	0.797268	3.37951	1.75682	0.67117	6.81274	2.76823	0.2153	0.0161368	0.0143066	0.0380554	0.0139008	0.0140738	0	0	0.0118119	0.0142211	0.0416051	0.0146258	0.196215
si:dkeyp-118a3.2	1	19303241..19331532	ENSDARG00000086957	1.197	0.259418	0.943134	-1.41083	-0.496544	0.962952	-1.68876	-0.755961	0.821071	0.029772	0.0527908	0	0.205174	0	0.11574	0.163986	0.0217928	0.0787129	0	0.0809527	0.0452516
tyrp1b	1	19332837..19346048	ENSDARG00000056151	-1.49567	-0.580793	0.289836	-1.14559	-0.196087	0.93592	1.30559	0.384706	0.597681	15.6373	8.93919	9.32614	7.9575	3.79132	8.4966	4.71118	4.6404	7.12989	7.00494	7.55166	11.8839
rbm47	1	complement(19353048..19402815)	ENSDARG00000061985	-1.50506	-0.589816	0.206092	-1.19935	-0.262252	0.901892	1.25489	0.327564	0.626992	9.03695	5.57485	5.49295	5.58688	3.37376	4.21067	3.23379	2.48211	7.2388	3.40938	3.44639	6.11723
lap3	1	complement(19418380..19431510)	ENSDARG00000061981	1.39744	0.482786	0.363984	1.03788	0.0536411	0.994824	-1.34644	-0.429145	0.472399	19.6519	12.6759	21.9635	24.7799	19.6732	20.1069	23.113	22.599	16.9173	17.8195	23.2843	17.4456
clockb	1	19433004..19466453	ENSDARG00000003631	-1.00424	-0.00609884	0.994662	1.22202	0.289271	0.93592	1.2272	0.295369	0.813485	4.43499	1.31067	4.16662	2.36062	1.76105	2.18669	3.04526	2.24343	2.51034	1.61139	3.88899	5.69964
kitb	1	complement(19473028..19502378)	ENSDARG00000056133	-2.07233	-1.05125	0.720583	-1.01917	-0.02739	0.995172	2.03336	1.02386	0.756714	0.198862	0	0.281386	0.102784	0.0346878	0.0309233	0	0.116452	0	0	0.288385	0.21158
clrn2	1	19515228..19517791	ENSDARG00000070321	1.96591	0.975198	0.665089	2.71249	1.43962	0.676	1.37976	0.464419	0.861566	0.125136	0.110944	0.295109	0.323391	0.763972	0.194589	0.229754	0.183197	0.441123	0.430182	1.02077	0.380399
smc2	1	19535120..19561801	ENSDARG00000017744	-1.45107	-0.53712	0.509641	1.48848	0.57384	0.712612	2.15989	1.11096	0.0345627	7.18005	3.90742	1.96172	3.69602	2.85106	3.08629	1.95598	1.13233	10.8805	4.26433	2.98933	5.45662
si:dkey-245p14.4	1	19535144..19537359	ENSDARG00000070320	1.14571	0.196241	0.942922	2.17636	1.12192	0.704361	1.89957	0.925675	0.587092	0.402073	0.712943	0.790174	0.230907	0.116891	0.41682	0.61518	0.686731	0.472455	1.03666	1.33622	1.42596
ecpas	1	complement(19562752..19599242)	ENSDARG00000061952	-1.10198	-0.140096	0.842511	-1.08472	-0.117325	0.961722	1.01591	0.0227703	0.982173	10.3982	5.51148	7.83652	6.14315	5.21015	5.66075	5.44979	4.55044	6.67954	4.66881	5.6852	8.44145
fbxo10	1	19602389..19632153	ENSDARG00000061936	-1.31114	-0.390822	0.842511	-1.15506	-0.207965	0.982781	1.13513	0.182857	0.956505	0.405984	0.229052	0.174079	0.127175	0.128757	0.028696	0.271054	0.13508	0.325262	0.0951583	0.20071	0.140243
polr1e	1	complement(19637312..19648227)	ENSDARG00000006434	-1.01947	-0.0278226	0.97002	-1.07586	-0.105489	0.981318	-1.05531	-0.0776666	0.960566	7.30782	9.64317	7.01386	8.93044	5.63247	8.58891	6.70868	4.91385	8.16267	6.35357	6.85459	7.74938
tmem192	1	19649545..19665774	ENSDARG00000037484	1.14593	0.196519	0.842511	1.10684	0.14644	0.969484	-1.03532	-0.0500789	0.982173	6.03486	6.12397	3.85808	4.76022	3.36094	6.78384	5.40659	3.45946	6.59999	5.62394	4.54716	4.91785
apela	1	complement(19667947..19673900)	ENSDARG00000094729	-4.47529	-2.16198	0.555835	-1.78073	-0.83247	0.93592	2.51318	1.32951	0.797197	0.136958	0.364275	0	0.353942	0	0	0.125729	0	0.482796	0	0	0
march1	1	19708508..19756359	ENSDARG00000037487	-2.5944	-1.3754	0.842511	-3.0085	-1.58904	0.93592	-1.15961	-0.213643	0.982173	0	0	0	0.0626728	0	0	0	0	0	0	0	0
tma16	1	complement(19759370..19764038)	ENSDARG00000008068	-1.00221	-0.00319064	0.99627	-1.02065	-0.0294823	0.995172	-1.01839	-0.0262916	0.982173	6.11089	5.01651	6.33832	6.43397	5.08293	4.53131	5.03851	4.05894	6.53234	5.00873	5.07713	5.33211
si:ch211-42i9.8	1	19764995..19802602	ENSDARG00000077648	-1.75675	-0.812907	0.473155	-1.00013	-0.000180758	0.999861	1.75653	0.812726	0.49043	1.51632	0.307279	1.12387	0.970331	0.264495	0.336844	0.755658	0.348836	1.18359	0.632967	0.706802	1.05358
grhprb	1	complement(19835803..19845539)	ENSDARG00000019986	-2.59436	-1.37538	0.842511	-3.00845	-1.58902	0.93592	-1.15961	-0.213643	0.982173	0.0478581	0	0	0	0	0	0	0	0	0	0	0
UBA6	1	19849168..19886389	ENSDARG00000080019	-1.15079	-0.202624	0.842511	-1.14131	-0.190689	0.952339	1.00831	0.0119357	0.990654	3.86986	1.35433	2.48172	1.78379	1.18426	1.76836	1.80746	1.4909	1.88473	1.40036	2.09219	2.16704
apbb2b	1	19930520..19989584	ENSDARG00000099995	-1.74874	-0.806319	0.300466	-1.42095	-0.506861	0.853976	1.23068	0.299458	0.821071	2.39445	0.538196	2.06786	1.42353	0.676506	0.524425	0.928791	0.641839	0.921354	0.898501	1.0087	1.23023
mettl14	1	complement(20063502..20068155)	ENSDARG00000070278	1.4598	0.545776	0.414592	1.0073	0.0104935	0.995172	-1.44923	-0.535282	0.44383	4.09212	4.98083	4.57988	4.12258	4.89979	5.33872	4.96638	5.1277	5.92904	3.87453	2.76599	4.37492
prss12	1	20069535..20141844	ENSDARG00000061830	1.42858	0.514577	0.606854	1.26278	0.336609	0.93592	-1.13129	-0.177968	0.900207	0.798836	0.76415	1.11547	1.1952	1.19175	0.473999	1.50528	1.13871	1.29685	0.469739	1.46713	1.43785
ndst3	1	complement(20147222..20273227)	ENSDARG00000041776	1.01888	0.0269872	0.985595	1.22761	0.295847	0.962953	1.20485	0.26886	0.899758	0.417459	0.0854107	0.151461	0.221302	0.112028	0.0998702	0.294795	0.188047	0.254701	0.137991	0.203737	0.390469
ugt8	1	complement(20556067..20593778)	ENSDARG00000037455	1.16967	0.226099	0.701698	-1.29406	-0.3719	0.708694	-1.51362	-0.598	0.104603	6.41743	4.59544	4.86836	4.929	4.85336	5.49555	5.02613	3.71201	5.16122	2.77694	3.51839	3.64926
si:ch211-142c4.1	1	20593653..20607152	ENSDARG00000093816	-6.04959	-2.59684	0.658733	-2.40829	-1.26801	0.93592	2.51198	1.32883	0.868338	0.77699	0	0	0	0	0	0	0	0.22825	0	0	0
spock3	1	20635190..20706296	ENSDARG00000070266	1.05674	0.079617	0.939813	1.23354	0.302806	0.901403	1.16731	0.223189	0.812783	13.8598	18.3737	11.8576	13.1069	8.88485	21.0423	9.27169	9.53716	15.5667	14.9551	15.2963	21.1325
tll1	1	complement(20733102..20826023)	ENSDARG00000037429	-1.12249	-0.166706	0.94438	-1.21268	-0.278195	0.969484	-1.08034	-0.111489	0.979175	0.410549	0.113746	0.302562	0.110519	0.134274	0.0399007	0.212	0.225388	0.180905	0.0882092	0.186053	0.234003
cpe	1	complement(20839482..20911297)	ENSDARG00000055874	1.04342	0.0613141	0.945055	1.18968	0.250569	0.900246	1.14018	0.189255	0.803381	9.47298	7.15576	7.2881	5.78179	6.35392	6.58916	6.04453	5.13063	6.94452	7.84927	8.81697	8.86176
msmo1	1	complement(20916551..20928772)	ENSDARG00000055876	-2.01749	-1.01256	0.305936	-7.45039	-2.89732	1.247e-06	-3.69289	-1.88475	0.00719294	222.508	317.509	53.9479	51.6522	25.4988	136.158	26.9759	67.9595	26.3556	23.5921	16.3173	15.5474
klhl2	1	complement(20932052..20970266)	ENSDARG00000061786	1.24276	0.313551	0.761449	1.24058	0.311014	0.93592	-1.00176	-0.00253697	0.998266	2.32115	0.887722	2.09299	1.41143	1.74656	1.69856	1.37879	1.49917	2.08571	1.5646	1.44379	2.45577
CT583646.2	1	20936711..20938512	ENSDARG00000094202	2.43933	1.28649	0.118553	2.50984	1.3276	0.158949	1.0289	0.0411092	0.982173	1.7279	0.612772	2.85244	3.27465	6.17872	2.82126	3.64834	3.41497	5.63426	5.04901	2.9756	6.17181
si:dkey-253i9.4	1	complement(21135012..21204114)	ENSDARG00000061459	1.00897	0.0128837	0.980172	-1.16336	-0.2183	0.901892	-1.1738	-0.231184	0.700448	3.861	3.29546	3.41067	3.03287	2.48846	2.76791	2.90765	2.5388	3.2873	2.40714	1.98105	3.26248
npy1r	1	complement(21242836..21297748)	ENSDARG00000037411	14.3029	3.83823	0.0246605	2.09286	1.06547	0.93592	-6.83414	-2.77276	0.0396395	0	0.130119	0	0	0.320006	0.570555	0.606294	0.429722	0	0.126134	0.199533	0
med28	1	21309386..21312596	ENSDARG00000037410	1.18217	0.241433	0.797268	1.07631	0.106091	0.981318	-1.09835	-0.135341	0.904688	10.3317	11.5948	6.93945	11.0406	6.84369	11.8969	11.5256	7.56267	10.1424	10.1157	10.4311	9.93892
tmem144a	1	complement(21313165..21321482)	ENSDARG00000037409	-1.68508	-0.752815	0.180344	1.159	0.212885	0.93592	1.95301	0.9657	0.0412686	6.5581	5.37085	4.0631	5.41002	1.79347	2.85197	2.50001	2.72569	7.05303	5.06304	3.87873	7.4337
gria2a	1	complement(21333068..21409877)	ENSDARG00000070173	1.79948	0.847579	0.674913	1.57716	0.657325	0.93592	-1.14096	-0.190253	0.958698	0	0.152793	0.121928	0.207843	0.0601229	0.0803971	0.379703	0.201841	0.091128	0.11849	0.249923	0.288139
glrba	1	complement(21423010..21483832)	ENSDARG00000052782	1.05429	0.0762653	0.969314	1.1736	0.230945	0.961394	1.11317	0.15468	0.930947	0.736552	0.957757	1.04221	0.930591	0.599565	0.916281	0.495854	0.934524	0.995306	0.97062	0.979123	1.0822
wdr19	1	complement(21495850..21538673)	ENSDARG00000037406	1.04731	0.0666907	0.969314	1.07176	0.0999828	0.990696	1.02334	0.0332921	0.982173	1.20957	0.559505	0.682126	0.566287	0.596269	0.552003	0.772452	0.519686	0.926935	0.31638	0.691151	1.05912
ncapd3	1	complement(21540453..21563040)	ENSDARG00000034773	-2.17893	-1.12362	0.0784922	1.3849	0.469784	0.866503	3.0176	1.5934	0.00218223	4.26282	1.65347	1.47654	1.85903	0.90623	1.03574	0.611458	0.663073	5.86995	2.28974	1.42473	2.38922
primpol	1	21563311..21573013	ENSDARG00000033273	-1.1307	-0.17721	0.9105	1.71418	0.777515	0.719813	1.93821	0.954726	0.31736	2.05776	1.30313	1.03989	1.62069	1.64086	1.55421	0.809592	0.258215	5.28497	1.31374	1.65192	1.74256
adamtsl7	1	complement(21576674..21599219)	ENSDARG00000055439	1.10636	0.145824	0.927319	1.54098	0.623844	0.828281	1.39283	0.478019	0.709831	0.801075	1.70453	0.566753	1.10412	1.30418	0.705889	0.784424	0.938206	2.0238	1.33103	1.21011	1.74521
zcchc7	1	complement(21610471..21714025)	ENSDARG00000055443	1.22572	0.293629	0.730154	-1.49437	-0.579537	0.611313	-1.83168	-0.873166	0.0828994	2.73286	2.0191	3.80085	2.14292	2.8113	3.05103	2.41231	1.84655	1.97615	1.32491	1.49253	1.784
si:ch211-134c9.2	1	complement(21721651..21723329)	ENSDARG00000095593	3.20261	1.67925	0.296716	-1.21053	-0.27564	0.985216	-3.87686	-1.95489	0.197809	0.840138	0.372427	0.495325	0.180932	1.46547	0.653215	2.50659	0.307486	0.1851	0.361019	0	0.798099
pax5	1	21725821..21815554	ENSDARG00000037383	-3.08088	-1.62334	0.603574	-1.197	-0.259425	0.990041	2.57383	1.36392	0.706831	0.207589	0	0	0.298042	0.120701	0	0	0	0.0609818	0.118939	0.125434	0.105174
melk	1	complement(21861387..21881818)	ENSDARG00000030759	-2.09702	-1.06834	0.375732	1.04889	0.0688602	0.995172	2.19954	1.1372	0.330535	1.61835	1.55779	0.163567	0.916129	0.362947	0.719019	0.297134	0.236923	2.15972	0.95373	0.502908	0.702799
frmpd1a	1	complement(21893289..21909608)	ENSDARG00000079074	-2.59456	-1.37549	0.842511	1.60983	0.686912	0.969484	4.17681	2.0624	0.766258	0	0	0.119912	0	0	0	0	0	0.0896209	0	0.0921711	0
kdm4c	1	21937201..21971913	ENSDARG00000061504	-1.0383	-0.0542291	0.954232	-1.19877	-0.26156	0.882896	-1.15455	-0.207331	0.769789	5.89212	3.36417	4.252	4.85237	3.22721	3.66494	4.28397	2.65679	3.34406	2.79525	4.29369	3.72556
dnah6	1	22002649..22235421	ENSDARG00000000606	-1.17672	-0.234775	0.935127	-3.20232	-1.67912	0.614929	-2.72139	-1.44434	0.515847	0.0278276	0.0246715	0.0765636	0.0479435	0.0242701	0.0432724	0.0425769	0.00678984	0	0	0.0420365	0.00704938
si:ch73-380n15.2	1	complement(22236489..22370660)	ENSDARG00000087224	3.57803	1.83916	0.797268	1.0556	0.0780585	0.995172	-3.38958	-1.76111	0.821071	0	0	0	0	0	0	0	0.0524841	0	0	0	0
chrnb3a	1	complement(22388799..22412042)	ENSDARG00000052764	2.36883	1.24417	0.230516	1.28676	0.363742	0.937885	-1.84093	-0.880433	0.483277	0.223458	0.594343	0.526981	0.38499	1.12062	0.825267	1.07697	0.327138	0.78772	0.480114	0.253167	0.594374
si:dkey-234d14.2	1	22427135..22428853	ENSDARG00000092275	2.03017	1.0216	0.756788	3.92118	1.97129	0.640604	1.93145	0.949687	0.73998	0	0.179705	0.119503	0	0.176781	0.315191	0	0	0.0893153	0.3484	0.459284	0.308081
chrna6	1	complement(22481723..22512136)	ENSDARG00000055559	-1.66187	-0.732804	0.588456	1.40543	0.491014	0.905542	2.33564	1.22382	0.214197	0.367517	0.217223	0.346687	0.253274	0.0641067	0.152399	0.202431	0.125542	0.215925	0.400082	0.399725	0.502743
chrnb5a	1	complement(22542457..22594338)	ENSDARG00000115778	1.11653	0.159023	0.950764	1.15767	0.211229	0.982085	1.03685	0.0522058	0.982173	0.166498	0.147615	0.174512	0.0478092	0.112943	0.258907	0.016983	0.0677082	0.114125	0.158992	0.150908	0.140593
uchl1	1	complement(22647756..22652424)	ENSDARG00000026871	1.28657	0.36353	0.49486	1.2095	0.274414	0.871445	-1.06372	-0.0891157	0.920215	22.26	19.8061	18.9098	16.014	17.8834	29.2798	19.1898	12.4396	24.3987	19.4051	21.7665	21.3432
anxa5b	1	22654875..22665098	ENSDARG00000016470	-1.00775	-0.0111447	0.98669	-1.17597	-0.233855	0.93592	-1.16692	-0.22271	0.817115	109.496	92.0638	64.0432	82.4397	75.1193	90.5455	59.6723	47.8079	86.5298	63.982	64.998	60.9225
fgfbp1b_1	1	complement(22677429..22678471)	ENSDARG00000091660	-1.172	-0.228978	0.903008	-2.16625	-1.1152	0.616997	-1.84833	-0.886224	0.56684	2.60821	1.82558	0.809336	1.41904	0.957801	1.81444	0.630098	1.00483	1.57271	0.471909	0.12442	0.73027
fgfbp2b	1	complement(22685961..22691182)	ENSDARG00000038056	-2.23313	-1.15907	0.414972	-1.31927	-0.39974	0.93592	1.6927	0.759329	0.693947	1.20865	0.306164	0.407195	1.18992	0.376478	0.134248	0.396271	0.189583	0.22825	0.59357	0.625987	0.721709
zmynd10	1	22691256..22703383	ENSDARG00000002406	5.93144	2.56838	0.678796	3.08399	1.6248	0.93592	-1.9233	-0.943585	0.861566	0	0	0	0	0	0.120508	0	0	0	0	0	0.0588949
prom1b	1	complement(22712931..22757145)	ENSDARG00000034007	-1.04905	-0.0690802	0.972305	1.14805	0.199191	0.990176	1.20436	0.268271	0.936439	0.211422	0.0803329	0.17807	0	0.0790259	0.0234832	0.0831806	0.13265	0.133088	0.155744	0.16425	0.0229535
tapt1b	1	complement(22770255..22803147)	ENSDARG00000061143	1.07903	0.109732	0.898904	1.16954	0.225938	0.93592	1.08388	0.116207	0.903128	3.7196	3.92588	4.03788	2.77189	3.37282	3.28221	3.19784	2.42018	3.95445	2.58782	4.54859	4.77861
ldb2b	1	complement(22805398..22834824)	ENSDARG00000034896	1.10851	0.148624	0.893499	-1.7231	-0.785009	0.431042	-1.91008	-0.933633	0.124844	1.14182	0.736236	1.19339	1.02832	0.882689	1.08955	0.88145	0.664844	0.457397	0.490658	0.564495	0.670536
BX908795.1	1	22842935..22873915	ENSDARG00000116099	#N/A	#N/A	#N/A	#N/A	#N/A	#N/A	#N/A	#N/A	#N/A	0	0	0	0	0	0	0	0	0	0	0	0
qdprb1	1	complement(22845225..22851481)	ENSDARG00000037378	1.03089	0.0438854	0.969314	-1.11615	-0.158536	0.969484	-1.15063	-0.202421	0.86417	7.65468	5.86109	4.64977	5.1953	3.64151	5.95158	3.83296	5.17867	4.08846	5.4822	4.2048	5.64104
gtf2e2	1	22851261..22876174	ENSDARG00000012672	1.10274	0.141094	0.842511	-1.03502	-0.0496532	0.993101	-1.14135	-0.190747	0.794989	3.85344	3.26786	2.72188	2.99877	2.88998	3.56056	2.5805	2.12573	3.47801	2.39982	2.83459	2.97094
SMIM18	1	complement(22857753..22861348)	ENSDARG00000093064	1.45997	0.545936	0.756788	1.23917	0.309374	0.963367	-1.17818	-0.236562	0.919911	0.906488	0.688868	0.305396	1.33866	0.33883	2.11441	0.832169	0.568749	0.798875	1.00165	1.17373	0.885733
adgrl3.1	1	complement(22943551..23157583)	ENSDARG00000061121	1.09178	0.126681	0.898256	1.16181	0.21638	0.93592	1.06415	0.0896987	0.947923	1.84986	2.10422	2.81918	1.99944	2.17653	1.20761	1.90646	2.12054	2.32234	3.22463	1.77155	2.09549
si:dkey-92j12.5	1	23161369..23240046	ENSDARG00000094677	2.40522	1.26617	0.701876	3.17765	1.66796	0.829035	1.32115	0.401789	0.920598	0	0.0321871	0	0.0156371	0.0316634	0	0	0.0664366	0.0799869	0.0156006	0	0.0827712
rfc1	1	complement(23243093..23274038)	ENSDARG00000054799	-1.07137	-0.0994578	0.895779	1.09828	0.135245	0.950082	1.17666	0.234703	0.741346	3.91968	2.61021	3.2456	2.35609	2.23348	2.58706	2.22296	1.747	4.29876	2.48534	2.25791	3.38925
CR759875.1	1	23261857..23292761	ENSDARG00000116939	#N/A	#N/A	#N/A	#N/A	#N/A	#N/A	#N/A	#N/A	#N/A	0	0	0	0	0	0	0	0	0	0	0	0
rpl9	1	complement(23269503..23274504)	ENSDARG00000037350	1.15333	0.205807	0.797268	1.00348	0.00500705	0.996081	-1.14934	-0.2008	0.821877	999.126	964.373	712.483	877.922	792.793	956.852	737.304	736.212	859.769	813.228	784.412	874.632
lias	1	23274710..23283468	ENSDARG00000022845	1.24527	0.316455	0.583067	-1.08759	-0.121141	0.961506	-1.35435	-0.437595	0.382193	28.6744	24.2969	26.7675	38.2741	28.3953	26.9974	35.0295	25.3622	28.3634	26.3122	25.448	21.054
ugdh	1	complement(23283532..23294753)	ENSDARG00000019838	-1.07546	-0.104959	0.909079	-1.23253	-0.301628	0.901892	-1.14605	-0.196669	0.837142	7.01642	9.72469	4.13671	7.38312	5.57721	5.14458	6.2781	4.12826	5.5573	5.76295	5.55444	4.79229
smim14	1	complement(23297623..23308308)	ENSDARG00000005799	-1.23339	-0.302629	0.625729	1.2444	0.315452	0.854796	1.53483	0.618082	0.142517	39.89	37.0371	27.9637	40.0724	23.0699	28.4618	23.4455	18.2049	58.3586	38.7247	27.0059	47.691
ube2kb	1	23311617..23322969	ENSDARG00000013505	1.34033	0.422583	0.359656	1.03204	0.0455004	0.995172	-1.29871	-0.377083	0.464311	13.2978	14.392	14.5264	13.7156	15.9421	15.0419	17.556	11.0035	15.6386	11.5814	12.2139	15.0406
pds5a	1	complement(23323002..23370618)	ENSDARG00000055022	-1.1093	-0.149646	0.81334	-1.08585	-0.118822	0.955672	1.0216	0.0308235	0.982173	15.0568	11.4803	12.8377	11.3342	8.28324	10.1759	8.88885	8.17283	13.0856	10.0536	9.38491	11.0202
n4bp2	1	23372470..23396454	ENSDARG00000061451	-1.78803	-0.838373	0.049543	-1.05904	-0.0827629	0.982781	1.68835	0.75561	0.0825962	3.12302	1.8741	2.62118	2.17338	0.868278	1.06034	1.30203	0.998263	2.16336	1.24238	2.1384	3.07817
rhoh	1	23398405..23398992	ENSDARG00000070121	-1.10312	-0.141592	0.954003	1.08704	0.120409	0.994326	1.19914	0.262001	0.899758	2.42611	0.896231	1.43038	1.21913	0.35266	1.10036	1.2992	1.33192	1.60357	0.695022	1.46596	2.15107
chrna9	1	23406403..23417937	ENSDARG00000054680	-1.78352	-0.834724	0.674041	1.01857	0.0265476	0.995172	1.81664	0.861272	0.689733	1.5893	0.080517	0.535435	1.83848	0.91088	0.741416	0.0416856	0.0664772	0.960429	0.156101	0.740819	2.03604
si:dkeyp-26a9.2	1	23489269..23506534	ENSDARG00000092290	-2.05528	-1.03933	0.383312	1.92766	0.946854	0.605647	3.96188	1.98619	0.0112972	0.573319	0.478397	0.238599	0.610086	0.411787	0.131106	0.123839	0.0740584	1.63466	0.492726	0.641903	0.820151
fam184b	1	complement(23506525..23557877)	ENSDARG00000055099	1.25848	0.331683	0.613875	1.06586	0.092023	0.980917	-1.18071	-0.23966	0.766809	16.9702	13.3594	22.46	17.9206	20.3128	17.8581	15.2297	15.8702	14.4657	13.7297	19.4387	22.5251
ncapg	1	23559478..23573230	ENSDARG00000070109	-1.63432	-0.708694	0.37615	1.47381	0.55955	0.798476	2.40868	1.26824	0.0245396	4.85614	2.74751	1.54455	2.39437	2.0898	1.21716	1.23182	0.912047	7.17967	3.34978	1.99802	3.49628
lcorl	1	complement(23573224..23596391)	ENSDARG00000070098	1.04153	0.0586992	0.951001	-1.11331	-0.154855	0.935972	-1.15954	-0.213554	0.773439	2.75741	1.73308	2.5187	1.77314	1.52424	1.71111	2.24612	1.59198	2.03076	1.32397	1.74828	2.19393
si:dkeyp-26a9.7	1	complement(23596731..23598674)	ENSDARG00000094046	1.76759	0.821783	0.83964	-1.26546	-0.339661	0.990599	-2.23681	-1.16144	0.77889	0	0.34632	0	0.224331	0.908495	0	0	0	0.2295	0	0.236031	0
slit2	1	23783349..23912788	ENSDARG00000004246	1.0527	0.0740961	0.937986	1.16928	0.225618	0.93592	1.11074	0.151522	0.86417	4.50178	3.23	5.10306	3.38826	3.16733	2.75143	3.88772	3.35471	4.14118	5.47437	4.09077	3.52703
lrba	1	complement(23919418..24349789)	ENSDARG00000031108	-1.36579	-0.449737	0.360204	-1.08002	-0.111058	0.969092	1.2646	0.338679	0.577056	7.95855	5.75764	6.25622	5.37494	3.87778	4.30674	3.7407	2.62539	8.51938	3.77557	4.01062	5.97568
mab21l2	1	24076243..24078099	ENSDARG00000015266	1.87471	0.906671	0.222011	1.39359	0.47881	0.870801	-1.34524	-0.427862	0.699301	2.30461	2.66755	1.20777	1.21323	2.90332	2.53846	3.29103	2.29613	2.36952	3.13602	2.49497	1.60548
rps3a	1	24355515..24359653	ENSDARG00000035692	1.13761	0.186012	0.81103	-1.01055	-0.0151407	0.995172	-1.14962	-0.201152	0.821071	2269.65	2051.76	1844.28	2156.37	1810.55	2233.65	1561.72	1802.57	2045.57	1840.77	1854.12	1945.29
pimr178	1	24365582..24367412	ENSDARG00000094885	#N/A	#N/A	#N/A	#N/A	#N/A	#N/A	#N/A	#N/A	#N/A	0	0	0	0	0	0	0	0	0	0	0	0
zgc:171517	1	24376394..24380533	ENSDARG00000090822	1.86792	0.901436	0.842511	-3.0085	-1.58904	0.93592	-5.61964	-2.49048	0.697336	0	0	0	0.120621	0.244245	0	0	0	0	0	0	0
sh3d19	1	complement(24376698..24462691)	ENSDARG00000088202	-1.85822	-0.893918	0.0202995	-1.38283	-0.467621	0.616997	1.34378	0.426298	0.475271	10.2072	6.84042	5.36069	6.85351	3.10722	3.36479	3.8324	2.06387	8.3983	4.18892	2.8923	4.53468
qdprb2_1	1	24382651..24385979	ENSDARG00000086859	-2.59447	-1.37544	0.843027	1.60999	0.687051	0.970161	4.17707	2.06249	0.768824	0	0.0926973	0	0	0	0	0	0	0	0.179716	0	0
qdprb2_2	1	24387659..24391673	ENSDARG00000090118	#N/A	#N/A	#N/A	#N/A	#N/A	#N/A	#N/A	#N/A	#N/A	0	0	0	0	0	0	0	0	0	0	0	0
fam160a1a	1	24469313..24514673	ENSDARG00000061021	-1.46938	-0.555209	0.452369	-1.84526	-0.883826	0.200949	-1.25581	-0.328617	0.750407	3.64437	1.59937	2.12715	1.96213	1.36675	1.38843	1.38842	0.773617	1.2044	0.532453	1.38731	1.53714
gatb	1	complement(24520503..24558838)	ENSDARG00000037309	1.08795	0.121615	0.868123	-1.05806	-0.0814186	0.981517	-1.15112	-0.203033	0.796282	7.62089	5.44517	6.18037	6.09402	5.16026	6.55035	3.77848	5.74318	5.66767	4.58749	4.6923	7.40451
dctpp1	1	24557414..24558749	ENSDARG00000054334	#N/A	#N/A	#N/A	#N/A	#N/A	#N/A	#N/A	#N/A	#N/A	0	0	0	0	0	0	0	0	0	0	0	0
fbxw7	1	complement(24870661..25144439)	ENSDARG00000060994	-1.04993	-0.0702992	0.944717	-1.28827	-0.365436	0.830738	-1.227	-0.295137	0.695106	7.04421	4.25275	9.69056	5.6925	3.51068	4.01642	7.51367	4.61611	5.55761	3.60357	4.77326	5.3024
tmem154	1	complement(25154076..25177225)	ENSDARG00000074776	-1.39357	-0.478789	0.572941	-1.14866	-0.199951	0.949503	1.21322	0.278837	0.811526	12.1135	5.555	6.69855	5.75726	4.08025	5.13138	5.06168	2.50721	8.02501	2.72832	4.54314	9.26939
mnd1	1	25178106..25216235	ENSDARG00000074451	-2.4385	-1.28599	0.00503483	1.14725	0.198176	0.937389	2.79756	1.48417	0.000359239	7.7964	4.2026	4.70689	5.85645	2.50229	1.60031	1.83224	1.324	7.42052	4.66351	6.33147	5.78283
tmem131l	1	25218177..25316149	ENSDARG00000079434	-1.086	-0.119022	0.847519	1.01405	0.0201329	0.995172	1.10126	0.139155	0.850763	17.8258	12.7958	12.2347	13.8096	10.0358	12.6553	10.428	7.84697	16.208	12.0024	10.7859	14.7616
trim2a	1	complement(25322445..25370281)	ENSDARG00000031817	-3.0388	-1.6035	0.150312	-1.31748	-0.397778	0.93592	2.30653	1.20572	0.370443	1.92424	0.30708	0.907588	0.497284	0.0671298	0.568523	0.176648	0.0845114	0.305245	0.396898	0.453456	1.28688
fhdc1	1	complement(25399514..25438934)	ENSDARG00000074812	-1.81953	-0.86357	0.541892	1.33502	0.41686	0.93592	2.42911	1.28043	0.246214	0.390665	0.121225	0.299425	0.10096	0.102217	0.0759365	0.125523	0.0714908	0.447574	0.100725	0.194747	0.371117
arfip1	1	complement(25442699..25486571)	ENSDARG00000070055	-1.33603	-0.417948	0.405144	-1.36938	-0.45352	0.568774	-1.02496	-0.0355722	0.982173	28.1526	13.7922	16.2901	14.551	10.5808	9.7936	13.535	8.07302	17.9556	8.33111	9.89093	13.3223
sfrp2	1	complement(25491324..25496133)	ENSDARG00000070050	1.22966	0.29826	0.758439	1.38066	0.465363	0.836332	1.1228	0.167103	0.885273	9.70245	4.17069	7.85823	5.99416	10.0007	5.63876	7.10759	3.65866	9.84618	4.88521	11.1923	9.31006
si:dkey-30k22.7	1	complement(25624758..25648568)	ENSDARG00000037286	-2.59456	-1.37549	0.842511	-3.00868	-1.58913	0.93592	-1.15961	-0.213643	0.982173	0	0	0.0388302	0	0	0	0	0	0	0	0	0
plrg1	1	25650917..25666604	ENSDARG00000037283	1.12598	0.171186	0.797268	-1.03052	-0.0433718	0.995172	-1.16035	-0.214558	0.766258	11.4432	8.79909	8.50526	8.2692	6.81122	9.57189	9.31016	6.9472	11.0885	7.13127	7.6682	7.83098
fgg	1	complement(25669799..25679383)	ENSDARG00000037281	#N/A	#N/A	#N/A	#N/A	#N/A	#N/A	#N/A	#N/A	#N/A	0	0	0	0	0	0	0	0	0	0	0	0
lrata	1	25696798..25698039	ENSDARG00000037278	2.60891	1.38345	0.739538	2.24854	1.16899	0.93592	-1.16027	-0.214461	0.978349	0	0	0	0.0882821	0	0.159362	0.0940802	0	0	0	0.0928862	0.155767
npy2r	1	25732715..25733867	ENSDARG00000094763	1.14345	0.193389	0.969314	2.34973	1.2325	0.93592	2.05495	1.03911	0.849186	0.103104	0	0	0	0	0	0	0.0754715	0	0	0.28035	0
map9	1	complement(25737767..25749888)	ENSDARG00000037276	1.05123	0.0720734	0.969314	-1.19374	-0.255486	0.938282	-1.25489	-0.327559	0.811354	1.66265	1.51503	1.30701	1.27313	1.4501	0.861817	1.82312	0.709942	1.70948	0.99231	1.08836	0.772178
gucy1a1	1	25783801..25799051	ENSDARG00000013787	1.98354	0.988076	0.410163	-1.4367	-0.522761	0.935742	-2.84975	-1.51084	0.116649	0.300526	0.152252	1.01247	0.443802	0.97354	0.834506	0.472949	0.597094	0.189178	0.368972	0.428035	0.195763
gucy1b1	1	25801648..25841659	ENSDARG00000086790	-1.02653	-0.0377791	0.979628	1.40906	0.494737	0.93592	1.44645	0.532516	0.768425	0.616246	0.0496686	0.528471	0.434338	0.390884	0.174232	0.308576	0.328063	0.592461	0.481472	0.45699	0.553479
fabp2	1	25848231..25851575	ENSDARG00000006427	1.55444	0.636391	0.442809	1.10596	0.145302	0.97732	-1.40551	-0.491089	0.616416	2.56494	2.66952	4.07644	3.07414	4.18229	3.72841	2.96891	3.91829	2.75185	2.87528	3.942	3.1358
usp53b	1	complement(25886437..25911901)	ENSDARG00000076499	-1.00854	-0.012264	0.993062	-1.08014	-0.111216	0.995172	-1.071	-0.0989524	0.981657	0.250725	0.254045	0.591286	0.277694	0.124956	0.139244	0.394575	0.367056	0.252526	0.184697	0.454496	0.272205
myoz2b	1	complement(25917591..25936679)	ENSDARG00000037266	1.44197	0.528042	0.395769	-1.45582	-0.541834	0.614929	-2.09925	-1.06988	0.00998223	85.1254	104.937	126.473	87.8688	103.617	80.4589	158.807	115.086	73.9761	65.0798	63.8706	57.8859
synpo2b	1	complement(25959084..25966411)	ENSDARG00000077157	1.55939	0.640984	0.245195	1.10071	0.13843	0.966649	-1.41672	-0.502554	0.446335	36.871	22.8476	48.5513	43.1331	52.4361	32.6055	53.4101	43.8743	37.4894	35.0485	43.0279	38.1522
si:ch211-145b13.5	1	complement(26011479..26023678)	ENSDARG00000037256	1.25191	0.324134	0.816453	-1.13147	-0.178195	0.978424	-1.4165	-0.502329	0.712678	0.657035	0.504848	0.929692	0.415063	0.687647	0.681134	0.442322	0.545069	0.65624	0.225869	0.397008	0.699057
BX323448.1	1	26012668..26045715	ENSDARG00000116236	#N/A	#N/A	#N/A	#N/A	#N/A	#N/A	#N/A	#N/A	#N/A	0	0	0	0	0	0	0	0	0	0	0	0
si:ch211-145b13.6	1	complement(26025292..26027337)	ENSDARG00000069998	1.1592	0.213125	0.797244	-1.03616	-0.0512451	0.995172	-1.20111	-0.26437	0.75625	13.1117	10.3653	17.7798	17.2248	13.6273	15.7165	12.0367	11.6771	11.9403	9.29656	13.1714	18.5174
gpank1	1	complement(26036123..26045584)	ENSDARG00000053995	-1.54946	-0.631763	0.420519	1.05149	0.0724284	0.995015	1.62923	0.704192	0.341986	3.43035	3.25105	2.23167	2.70029	1.54749	1.51751	1.24879	1.55854	3.02312	3.0498	2.57309	2.9216
pdcd4a	1	complement(26046148..26071535)	ENSDARG00000021702	-1.23845	-0.308536	0.656336	-1.02886	-0.0410405	0.995172	1.20372	0.267496	0.741346	48.3995	39.2599	42.0293	43.8491	28.5874	27.6191	30.9797	22.8701	44.2902	30.7719	40.282	42.8256
mxd4	1	26071869..26096572	ENSDARG00000054031	-1.37364	-0.458003	0.398848	1.30325	0.382119	0.790057	1.7902	0.840122	0.0263056	9.31258	4.49126	7.08217	5.93173	3.46577	3.60852	4.92895	3.06419	6.89713	5.70933	10.4476	8.82931
ndufb6	1	26099250..26103232	ENSDARG00000037259	1.3407	0.422983	0.524816	-1.0354	-0.0501861	0.995172	-1.38816	-0.473169	0.469372	297.522	359.229	321.313	383.237	356.207	315.536	397.315	367.184	287.301	350.636	324.613	259.721
toporsa	1	26105141..26109961	ENSDARG00000037260	-1.60431	-0.681949	0.224374	-1.04563	-0.0643678	0.99286	1.5343	0.617581	0.297105	3.06323	2.71582	2.49767	2.55457	1.02318	1.59624	1.49579	1.16884	3.10165	1.93246	2.12661	2.57562
mtap	1	26110985..26127944	ENSDARG00000037261	-1.03144	-0.044657	0.969314	-1.05697	-0.0799283	0.981318	-1.02475	-0.0352714	0.982173	43.7343	39.6778	26.6587	35.4395	28.2842	36.1651	26.539	20.8221	39.7673	26.7565	25.8662	37.9547
cdkn2a/b	1	complement(26127818..26131088)	ENSDARG00000037262	1.54824	0.630626	0.88364	1.71356	0.776995	0.949728	1.10678	0.146368	0.982173	0.300201	0	0.353982	0	0	0.233409	0.551177	0	0	0.774002	0	0.228143
cxxc4	1	complement(26250729..26294995)	ENSDARG00000077817	1.31724	0.397518	0.875835	1.92414	0.944212	0.870801	1.46073	0.546694	0.827615	0.0898107	0.0265416	0.141201	0.0257888	0.0522196	0.116381	0.0274825	0.0657406	0.052766	0.1801	0.135669	0.113756
tet2	1	26356205..26402046	ENSDARG00000076928	-1.02035	-0.0290575	0.969314	1.07569	0.105259	0.969484	1.09757	0.134317	0.86417	4.75083	2.43289	2.6513	3.04077	2.38277	2.36855	2.87426	2.106	2.92972	2.33759	3.92249	3.50943
ppa2	1	complement(26389153..26398361)	ENSDARG00000009685	1.10218	0.140358	0.875324	-1.03785	-0.0535943	0.995172	-1.14389	-0.193952	0.847145	3.28884	2.95139	3.49969	2.72948	2.83341	2.58829	2.79828	2.46611	3.25187	2.10265	2.69007	3.10903
arhgef38	1	26411496..26437820	ENSDARG00000079377	-2.0518	-1.03689	0.147655	-1.68157	-0.749805	0.602417	1.22017	0.287086	0.8364	2.75264	2.78363	2.02861	2.18597	0.825254	1.63859	0.710707	0.598174	2.42586	0.628387	1.01355	1.53625
ints12	1	complement(26438597..26444075)	ENSDARG00000091678	1.09849	0.135526	0.851065	1.0704	0.0981456	0.975983	-1.02625	-0.0373801	0.982173	7.33677	7.24504	6.61146	6.67985	5.93063	7.51312	5.3663	5.15213	7.412	6.45921	6.10915	7.97827
g3bp2	1	26444986..26466002	ENSDARG00000014790	-1.22584	-0.293775	0.641273	1.03056	0.0434355	0.995172	1.26331	0.33721	0.593652	9.58837	5.33107	4.85461	5.76318	3.7797	5.2438	4.00328	3.15242	8.83202	4.77204	4.54167	6.46349
uso1	1	26467071..26509316	ENSDARG00000019581	-1.19075	-0.25187	0.648498	-1.21013	-0.275164	0.858151	-1.01628	-0.0232933	0.982173	15.1786	11.7361	12.8787	12.7329	9.46457	9.9649	8.45926	6.71086	12.9232	7.5978	9.2846	10.9665
si:ch211-202n12.2	1	complement(26538446..26544268)	ENSDARG00000096665	-4.45001	-2.15381	0.760382	4.97606	2.315	0.783042	22.1435	4.46881	0.368469	0	0.0764853	0	0	0	0	0	0	0	0	0	0.491717
coro2a	1	26605065..26654311	ENSDARG00000005210	-1.31248	-0.392293	0.518015	-1.58808	-0.667284	0.235938	-1.20999	-0.274992	0.718185	8.6513	7.06458	6.04018	6.83151	4.1036	6.69696	4.04067	2.49974	5.48412	3.39148	3.61109	4.46966
anp32b	1	complement(26660369..26664840)	ENSDARG00000023330	1.15516	0.208094	0.802632	1.08126	0.112716	0.976382	-1.06834	-0.0953776	0.936145	77.4212	74.3008	55.6515	62.0988	54.9775	90.2935	62.9128	40.8177	91.7333	69.1772	48.6368	65.1023
hemgn	1	26667872..26671210	ENSDARG00000096667	1.99262	0.994669	0.0201248	1.42905	0.515056	0.640043	-1.39437	-0.479613	0.460897	17.9568	16.2894	12.9498	14.3478	20.8363	43.8678	21.3583	12.9156	16.8801	15.5668	24.6726	24.8804
trmo	1	complement(26670828..26676391)	ENSDARG00000037245	1.17659	0.234617	0.864624	1.15934	0.213298	0.968783	-1.01489	-0.0213192	0.988	1.50654	1.4571	1.21121	0.884856	1.19449	0.692159	1.69734	1.10277	1.81049	0.64738	1.6758	1.40513
si:dkey-25o16.4	1	26676758..26700439	ENSDARG00000096554	-2.52781	-1.33789	0.106453	1.4794	0.565014	0.869916	3.73964	1.9029	0.0040893	1.44233	1.13888	0.239164	0.776548	0.353796	0.332923	0.206887	0.214453	2.52235	0.735999	0.633211	1.28452
foxe1	1	complement(26701610..26702992)	ENSDARG00000079266	1.01476	0.0211424	0.990713	1.17073	0.227402	0.984375	1.15369	0.20626	0.956146	0.515746	0.152418	0.810857	0.222142	0.449813	0.267332	0.315641	0.251681	0.151507	0.295498	0.0779089	1.24118
sh3gl2a	1	complement(26740718..26782573)	ENSDARG00000023600	1.12094	0.164703	0.866219	-1.06655	-0.0929549	0.986036	-1.19554	-0.257658	0.813702	4.99281	2.68955	5.36562	3.42991	3.96869	2.94832	4.0613	3.19207	4.45579	3.91075	3.49422	2.25742
cntln	1	complement(26821963..27014935)	ENSDARG00000033345	-1.27264	-0.347823	0.789422	1.28486	0.36161	0.93592	1.63516	0.709433	0.480466	0.388072	0.315388	0.362264	0.306442	0.155128	0.188581	0.326568	0.177541	0.598505	0.305727	0.425013	0.331789
bnc2	1	27023687..27212459	ENSDARG00000069989	1.07234	0.100758	0.890391	-1.1331	-0.180272	0.93592	-1.21506	-0.281029	0.66263	3.6009	2.05862	2.32799	2.0751	2.37167	2.48114	2.029	1.50878	2.18857	1.66474	2.21708	2.12321
si:ch211-127n13.2	1	complement(27530825..27542119)	ENSDARG00000095189	1.22408	0.291702	0.969314	3.08424	1.62491	0.93592	2.51963	1.33321	0.86417	0	0	0	0	0	0	0	0	0	0	0.112355	0
si:dkey-29d5.1	1	27713349..27733179	ENSDARG00000104096	#N/A	#N/A	#N/A	#N/A	#N/A	#N/A	#N/A	#N/A	#N/A	0	0	0	0	0	0	0	0	0	0	0	0
si:dkey-29d5.2	1	complement(27738647..27743985)	ENSDARG00000102639	3.57803	1.83917	0.798642	5.11308	2.35419	0.902642	1.42902	0.515026	0.935841	0	0	0	0	0	0	0.0657428	0	0	0.123094	0	0
pspc1	1	27808916..27861148	ENSDARG00000006621	-1.0053	-0.00762719	0.99066	1.00206	0.00297085	0.997686	1.00737	0.010598	0.989961	7.01955	5.82192	5.47358	5.41296	4.69037	5.14966	5.19681	3.56362	6.98445	4.86516	3.84814	6.49622
dnajb14	1	27867706..27894817	ENSDARG00000069996	-1.10753	-0.147344	0.848399	-1.03553	-0.050372	0.995172	1.06953	0.0969721	0.927333	5.03697	3.93481	3.61345	3.76252	2.76485	3.61504	2.84554	2.34628	5.40131	2.20986	2.96906	4.39009
sugt1	1	27977297..28020042	ENSDARG00000100083	1.16559	0.22106	0.726438	-1.01478	-0.0211726	0.995172	-1.18282	-0.242233	0.710688	23.8677	18.5563	16.7238	19.058	18.6547	23.8391	16.391	13.0024	22.2073	15.5422	15.5174	19.0457
chst10	1	28031697..28047242	ENSDARG00000031632	1.48998	0.575293	0.375028	-1.00215	-0.00309537	0.997847	-1.49318	-0.578388	0.381484	3.35247	5.0481	4.07856	4.58403	5.98701	5.1304	5.12935	4.08995	3.37655	3.1556	5.11248	4.48893
snapc3	1	complement(28067771..28089650)	ENSDARG00000101474	1.14309	0.192936	0.822138	1.03246	0.0460899	0.995172	-1.10715	-0.146846	0.876698	9.46679	6.38768	8.49557	7.28903	7.45283	8.01189	8.38301	4.53797	7.45698	6.55202	8.35256	7.95849
psip1a	1	28089703..28195267	ENSDARG00000104710	-1.09893	-0.136104	0.877062	1.18751	0.247941	0.93592	1.305	0.384045	0.607471	7.53355	6.34518	7.19539	5.84072	4.2708	5.56454	5.39441	3.86014	9.2949	6.02132	7.98892	6.64132
si:ch1073-440b2.1	1	complement(28391631..28473487)	ENSDARG00000089138	-1.09654	-0.132964	0.890625	1.10502	0.144069	0.966402	1.2117	0.277033	0.767881	11.632	5.82673	9.05252	6.36288	6.2899	4.97421	4.16457	7.0245	7.73962	4.44862	9.69943	11.6688
FO907124.1	1	complement(28594809..28607353)	ENSDARG00000112052	1.57545	0.655766	0.644322	1.46347	0.549396	0.901892	-1.07652	-0.10637	0.97508	0.182704	0.233975	0.335122	0.0524627	0.300989	0.220973	0.298178	0.163457	0.447263	0.261702	0.257594	0.123422
ednrba	1	complement(28624186..28629471)	ENSDARG00000089334	-1.20538	-0.26949	0.88339	1.06996	0.0975585	0.995172	1.28971	0.367049	0.861566	1.35725	0.99097	1.69455	0.343879	0.557056	0.620751	1.24598	0.409087	0.703605	0.274461	1.23017	2.12362
GK3P	1	complement(28723817..28831848)	ENSDARG00000053456	-1.4687	-0.554543	0.537426	1.57067	0.65138	0.656902	2.30685	1.20592	0.0327255	2.95073	1.77361	3.24347	4.04976	1.91923	1.08878	2.38743	1.06165	4.18715	2.23507	6.98073	4.18087
timmdc1	1	complement(28832671..28861226)	ENSDARG00000053466	1.16032	0.214524	0.739884	-1.21695	-0.283267	0.870801	-1.41205	-0.497791	0.274997	6.11397	7.0335	4.92342	5.36957	4.83814	6.37687	5.69485	4.67185	5.25674	4.76751	3.91958	4.21579
poglut1	1	complement(28874389..28890028)	ENSDARG00000053463	1.41014	0.495835	0.509641	1.1534	0.205896	0.937885	-1.22259	-0.28994	0.770039	3.23577	6.42359	5.05964	5.93841	4.78532	7.87568	5.16606	5.56095	5.82727	5.13864	6.24811	5.55968
pwp2h	1	complement(28898945..28950366)	ENSDARG00000037109	1.00002	2.60468e-05	0.99992	-1.33651	-0.418472	0.764137	-1.33654	-0.418498	0.511973	5.22585	4.3877	5.18267	5.18744	4.58796	4.73585	4.06667	2.45729	3.20248	2.49844	3.48181	4.81313
gpm6ba	1	complement(28961653..29045426)	ENSDARG00000005739	-1.50859	-0.593202	0.82062	1.48612	0.571549	0.93592	2.24195	1.16475	0.596771	0.20603	0	0.607352	0.0887411	0.0898457	0.0800952	0.189139	0.0754061	0.453929	0.265602	0.420161	0.0391442
gemin8	1	complement(29058268..29061327)	ENSDARG00000053496	1.17916	0.237757	0.688103	1.06232	0.0872131	0.976986	-1.10999	-0.150544	0.842957	15.3968	13.435	15.0974	15.2878	15.4074	16.1926	14.2089	9.37215	16.2114	11.7699	13.9551	16.9974
cbsa	1	29068649..29093562	ENSDARG00000053500	1.51886	0.602992	0.449157	-2.06108	-1.0434	0.158121	-3.1305	-1.64639	0.000631999	2.63063	1.51783	3.20039	2.58986	3.31404	3.44137	3.83326	1.37543	1.25117	0.717726	1.51385	0.983733
cryaa	1	29096881..29100923	ENSDARG00000053502	1.12758	0.173231	0.969618	2.80699	1.48902	0.920212	2.48939	1.31579	0.799308	0	0.0743802	0	0	0	0	0	0.0614104	0.295743	0	0	0
hsf2bp	1	complement(29102011..29139183)	ENSDARG00000035080	5.50683	2.46122	0.292855	3.22913	1.69115	0.832757	-1.70536	-0.770074	0.787797	0	0	0.185052	0	0.342185	0.12202	0.072035	0.229752	0.276612	0.134876	0	0.119267
ankrd10a	1	29140884..29164911	ENSDARG00000037100	1.29179	0.369367	0.775922	-1.01009	-0.0144869	0.995172	-1.30482	-0.383854	0.787733	2.35072	0.978259	1.13137	0.826532	1.88284	1.75311	1.14506	0.526747	1.56431	0.865833	0.608746	1.78648
si:ch211-198k9.6	1	29178117..29179934	ENSDARG00000069804	2.47225	1.30582	0.758865	14.663	3.87411	0.162405	5.93104	2.56828	0.271116	0	0.203469	0	0	0.100079	0	0.316022	0.0839948	0.101126	0	0	3.92424
cars2	1	29183962..29202689	ENSDARG00000078546	1.24363	0.314562	0.766357	1.13211	0.179018	0.964097	-1.09851	-0.135544	0.927243	2.76464	2.35682	4.26298	5.77071	4.08051	3.2243	4.34384	3.23012	2.43644	2.46739	5.68617	5.49503
irs2a	1	29211540..29228393	ENSDARG00000037099	-7.36032	-2.87977	7.25268e-11	-1.78377	-0.834931	0.404571	4.12627	2.04484	2.88108e-05	6.21351	2.41482	11.1071	5.6214	0.618627	0.507372	1.09393	0.4569	2.15035	1.70687	4.65451	4.52802
lig4	1	29267841..29271473	ENSDARG00000060620	-1.31589	-0.396039	0.598571	-1.03652	-0.0517525	0.995172	1.26952	0.344287	0.693268	3.68082	2.10018	2.62133	3.32777	1.55745	1.87013	2.07426	1.49388	3.62926	2.16113	2.2131	2.63113
fam155a	1	29281764..29391034	ENSDARG00000075858	-6.14936	-2.62044	0.64468	-1.4723	-0.55807	0.969484	4.17671	2.06237	0.767881	0.0836002	0	0.0492887	0	0	0	0	0	0	0.0359242	0	0.0317668
si:dkey-228l14.1	1	29515160..29519002	ENSDARG00000069799	#N/A	#N/A	#N/A	#N/A	#N/A	#N/A	#N/A	#N/A	#N/A	0	0	0	0	0	0	0	0	0	0	0	0
si:dkey-1h24.2	1	complement(29608128..29653472)	ENSDARG00000074117	-2.22157	-1.15158	0.688672	-1.64399	-0.717197	0.93592	1.35133	0.434381	0.923466	0.134175	0	0.316426	0.115584	0.0585113	0	0.0615875	0.0491076	0.118247	0	0.0608059	0.101969
si:dkey-1h24.6	1	complement(29653947..29658721)	ENSDARG00000092653	-1.0329	-0.0466963	0.969314	1.25474	0.327387	0.901892	1.29602	0.374083	0.683996	5.43847	4.63622	3.61747	4.14434	4.07431	2.76476	4.73656	2.24564	6.39047	4.55413	4.42367	5.72272
raph1b	1	29664336..29743640	ENSDARG00000061732	1.17619	0.234121	0.730154	-1.25289	-0.325265	0.854472	-1.47364	-0.559386	0.225155	3.91421	3.71079	4.47835	2.97123	4.81652	3.02826	3.13079	2.86516	3.34707	2.51466	3.17887	2.16474
spp2	1	complement(29743442..29747702)	ENSDARG00000095590	2.05631	1.04006	0.430604	1.65163	0.723894	0.870801	-1.24501	-0.316163	0.871479	1.16434	0.722603	3.98152	0.601806	6.39761	1.62952	0.961995	1.1932	2.05224	2.50167	2.42723	2.6546
alg11	1	complement(29750937..29761086)	ENSDARG00000031202	1.06517	0.0910897	0.929597	1.05831	0.0817589	0.986335	-1.00649	-0.00933073	0.991503	3.97075	4.13109	4.06102	3.42056	2.82705	3.62285	3.45923	3.0845	4.03499	4.52688	3.45205	3.35637
cpb2	1	29759678..29764060	ENSDARG00000037144	#N/A	#N/A	#N/A	#N/A	#N/A	#N/A	#N/A	#N/A	#N/A	0	0	0	0	0	0	0	0	0	0	0	0
zc3h13	1	29766725..29797907	ENSDARG00000037177	1.1908	0.251929	0.64468	-1.03	-0.0426467	0.995172	-1.22652	-0.294576	0.590503	10.4812	7.56115	10.2912	7.99896	8.08115	9.52805	9.40234	6.7532	8.81544	8.51117	7.00741	8.25309
tm9sf2	1	29798140..29824375	ENSDARG00000003866	-1.05549	-0.0779112	0.932321	-1.16221	-0.216868	0.93592	-1.10111	-0.138957	0.871131	84.7469	69.7118	64.7359	64.4115	55.5961	63.5588	52.1521	40.1866	75.9911	51.4023	44.9921	57.0022
zic2b	1	29831759..29860895	ENSDARG00000037178	2.45902	1.29808	0.666726	3.31105	1.72729	0.779972	1.34649	0.429208	0.903841	0.158647	0	0	0.0455548	0	0	0.339827	0.0774187	0.0932089	0.31814	0.143792	0.0803779
pcca	1	29862074..29953746	ENSDARG00000028982	1.03147	0.0447055	0.969314	-1.13289	-0.180009	0.948592	-1.16855	-0.224714	0.825448	44.7847	26.1211	51.145	42.8475	26.6934	23.5001	46.2914	34.3164	35.0006	39.2426	29.6057	29.0818
march4l	1	complement(29954690..30039332)	ENSDARG00000055839	1.09379	0.129335	0.969314	-2.32347	-1.21628	0.901892	-2.54139	-1.34562	0.695106	0.074814	0.066329	0.0882171	0.128895	0	0.116337	0.0686803	0.109526	0	0	0.0678087	0.0568564
vps8	1	30083578..30310689	ENSDARG00000060477	-1.16872	-0.224933	0.734063	-1.02414	-0.0344112	0.995172	1.14118	0.190522	0.81468	4.99537	4.19935	4.88315	3.52283	2.86689	3.74308	2.56616	2.50086	4.2883	3.91501	3.82385	3.91435
C1H3orf70	1	complement(30343714..30366824)	ENSDARG00000091513	1.47917	0.564789	0.200417	1.46494	0.550845	0.374185	-1.00971	-0.0139436	0.984517	3.49352	3.23004	3.73687	3.03095	4.13509	3.76394	4.05469	3.61664	3.84849	3.9246	5.6769	4.87376
tmem41ab	1	30422143..30438036	ENSDARG00000026771	1.64565	0.718655	0.206719	-1.46742	-0.553286	0.646372	-2.41486	-1.27194	0.00218223	171.756	80.4888	57.5753	81.6933	118.448	99.1547	144.891	123.658	56.6	63.1567	59.4338	60.3697
igf2bp2b	1	complement(30443193..30510957)	ENSDARG00000099758	-1.37705	-0.461581	0.335307	-1.36728	-0.451311	0.58156	1.00714	0.0102705	0.988535	14.1523	9.81958	11.6089	10.3891	6.5472	7.3676	6.5525	5.49496	9.5982	5.28821	6.9155	9.39923
ubac2	1	complement(30539971..30568225)	ENSDARG00000093065	-1.01785	-0.0255242	0.974174	1.06214	0.0869679	0.988432	1.08109	0.112492	0.935325	6.06732	3.07383	5.66054	3.84817	3.60532	3.47325	3.12158	3.70915	3.17297	4.01109	5.07618	5.72572
gpr183b	1	30551777..30554973	ENSDARG00000074302	-1.37109	-0.455319	0.842511	-1.22623	-0.294227	0.976986	1.11813	0.161092	0.97481	0.746816	0.0601923	0.240166	0.292425	0.118426	0.211148	0.373957	0.0496965	0.538493	0.116697	0.246141	0.103192
dachc	1	complement(30585140..30689004)	ENSDARG00000003142	-1.07838	-0.108868	0.945772	1.00181	0.00260504	0.998545	1.08033	0.111473	0.956251	0.981369	1.26555	1.68318	0.883815	0.933721	0.867072	0.737108	0.881614	1.57248	1.11177	0.808616	0.983114
MZT1	1	complement(30718246..30723258)	ENSDARG00000096668	1.39064	0.475754	0.487948	1.32745	0.408656	0.834337	-1.04761	-0.0670972	0.969525	7.33037	5.93387	4.50971	6.49769	6.67123	6.85584	7.21702	6.06564	8.51991	7.48686	6.93285	7.67002
bora	1	30723380..30735478	ENSDARG00000042688	-1.12497	-0.169892	0.949998	1.82724	0.869665	0.829035	2.0556	1.03956	0.492288	0.256601	0.259998	0.129673	0.126312	0.127884	0.199509	0.0336519	0.160996	0.710721	0.252034	0.132899	0.278584
dis3	1	complement(30736449..30762264)	ENSDARG00000060559	1.26766	0.342169	0.647531	-1.09206	-0.127047	0.970161	-1.38436	-0.469216	0.494825	3.29509	2.27218	3.4537	3.1539	2.45873	3.55828	3.5627	2.43877	3.03298	1.85646	2.85381	2.64329
metap1d	1	30946231..30974165	ENSDARG00000019715	-1.15936	-0.213331	0.842511	1.1347	0.182311	0.961394	1.31553	0.395642	0.688433	5.20562	6.02806	6.26349	5.30797	2.50171	4.95603	4.09614	3.7327	7.20915	5.7521	5.87366	5.49012
dlx2b	1	complement(30977936..30979707)	ENSDARG00000017174	1.05102	0.0717883	0.969314	-1.18398	-0.243648	0.93592	-1.24439	-0.315436	0.793161	3.67346	3.53401	2.39619	1.88521	1.97684	2.85615	3.08529	1.65913	3.16849	1.94798	2.55025	1.48496
itga6b	1	31019165..31064706	ENSDARG00000069946	1.08887	0.122835	0.907664	-1.02604	-0.0370869	0.995172	-1.11723	-0.159922	0.884558	67.2958	59.6871	79.98	59.2558	83.7074	52.7993	52.4396	39.0843	44.0049	33.1406	72.4354	94.8175
ppp1r9alb	1	complement(31071708..31105376)	ENSDARG00000074575	-2.06048	-1.04298	0.000724574	-1.15072	-0.202538	0.935711	1.7906	0.840446	0.0112972	8.89716	7.11039	7.60975	7.52042	2.51372	3.3289	2.78009	3.08815	8.08022	4.45146	5.0921	7.96787
eef1a1l2	1	31110817..31130222	ENSDARG00000069951	1.04966	0.0699289	0.969314	1.35519	0.438498	0.866503	1.29107	0.368569	0.716858	2.93992	1.70606	2.39511	2.16418	1.44521	2.28581	1.37398	2.23024	2.49669	2.94009	3.14911	2.88421
kcnq5b	1	complement(31134942..31350148)	ENSDARG00000069953	-1.80953	-0.855617	0.0920829	-1.26553	-0.339746	0.883753	1.42986	0.51587	0.462143	3.3398	3.26733	2.5462	2.505	0.853763	1.63414	1.66514	0.948374	2.58809	1.75683	1.90497	2.42874
rims1b	1	complement(31374751..31505144)	ENSDARG00000078902	-1.11655	-0.159049	0.969314	-1.29571	-0.373742	0.982781	-1.16046	-0.214693	0.978056	0.0292446	0.0259279	0.103452	0	0.0765181	0	0	0.0214068	0.0257729	0	0.0265063	0.0444501
cenpk	1	complement(31508739..31516112)	ENSDARG00000039616	-1.03087	-0.0438576	0.970232	1.75483	0.811331	0.680501	1.809	0.855189	0.405636	2.56985	1.60331	0.785619	2.21377	1.66024	2.14609	0.524258	1.11473	5.36836	1.9632	2.07042	2.74868
lbx1b	1	complement(31531990..31534089)	ENSDARG00000018611	2.09529	1.06715	0.71789	2.21887	1.14983	0.900246	1.05898	0.082677	0.982173	0.146855	0.1302	0	0	0.0640407	0	0.404446	0.0537484	0.194132	0.126212	0.199657	0.111606
slc2a15b	1	31573225..31598417	ENSDARG00000053269	-1.79209	-0.841646	0.257572	-1.12381	-0.168402	0.969484	1.59465	0.673244	0.447156	4.29685	2.53968	2.05603	1.66298	1.03193	1.45254	1.42919	0.68375	1.86594	2.24781	1.63682	2.83954
fgf8b	1	31638274..31669901	ENSDARG00000039615	1.56507	0.646226	0.649851	1.11828	0.161283	0.986036	-1.39953	-0.484943	0.775598	0.726055	0.686624	0.342452	0.166787	0.379942	0.489246	0.799835	0.67319	0.810492	0.540793	0.307099	0.367853
dpcd	1	complement(31654203..31657854)	ENSDARG00000060501	-1.10049	-0.138148	0.906994	-1.0434	-0.0612942	0.995172	1.05472	0.076854	0.973279	5.08823	4.10104	4.09077	2.88892	2.72316	3.23684	3.07865	2.37016	4.68801	2.68341	3.35402	3.69113
poll	1	31657842..31672343	ENSDARG00000039613	-1.07962	-0.110519	0.915764	1.14094	0.190225	0.941971	1.23178	0.300744	0.761864	4.12855	3.05861	3.93456	3.11801	2.02234	2.0667	4.25733	2.0285	3.78795	3.15934	4.15204	3.9542
wbp1lb	1	31674297..31699955	ENSDARG00000029751	-1.84144	-0.880835	0.30143	-1.22093	-0.287979	0.93592	1.50823	0.592855	0.60023	4.48019	3.28723	3.73441	2.79474	1.28002	0.36035	2.411	1.8659	1.90609	2.05797	3.29055	3.52221
as3mt	1	31706668..31722875	ENSDARG00000027572	1.14234	0.19199	0.842511	1.3283	0.409576	0.854796	1.16279	0.217586	0.8368	9.70819	9.33793	6.69566	5.91722	4.55306	8.2603	6.55807	8.58119	10.9771	10.6261	8.4671	9.118
cnnm2b	1	31725154..31799359	ENSDARG00000078733	-1.41452	-0.50031	0.763995	-1.50739	-0.592053	0.901892	-1.06566	-0.0917434	0.982173	0.210904	0.290864	0.165792	0.100934	0.163504	0.10932	0.0645375	0.0857664	0.165215	0.100698	0.127437	0.0890447
nt5c2b	1	complement(31809173..31856676)	ENSDARG00000058231	1.06183	0.0865534	0.965192	1.17211	0.229113	0.955405	1.10386	0.14256	0.934766	9.47677	4.99864	6.43597	3.82348	3.92338	1.63221	9.91117	4.56606	4.54589	2.98979	9.51357	9.48119
inab	1	31864404..31867717	ENSDARG00000053248	-1.20957	-0.274495	0.922346	1.46084	0.546801	0.93592	1.76699	0.821296	0.724552	0.301419	0	0.142167	0.259653	0	0.0937423	0.221365	0.132381	0.318763	0.155428	0.273195	0.229069
anos1a	1	31942961..31979510	ENSDARG00000012896	-1.25982	-0.333218	0.678191	1.35923	0.442794	0.798273	1.71239	0.776013	0.126996	4.27409	3.70123	4.45378	2.99687	2.34065	2.12527	2.41808	2.54653	5.78145	4.99736	4.36938	4.30573
BX901898.2	1	32013688..32014487	ENSDARG00000100996	-1.33218	-0.413787	0.843027	1.22468	0.29241	0.971445	1.6315	0.706197	0.742807	1.0402	0.790476	0.876106	0.896064	0.129602	0.346612	0.272832	1.19651	1.44054	0.893973	0.134685	1.69397
sts	1	32051581..32077473	ENSDARG00000053241	-1.18522	-0.245159	0.884326	-2.20891	-1.14333	0.480323	-1.8637	-0.898173	0.485133	7.90443	2.9142	0.738259	0.910137	0.40954	1.8559	2.94566	2.46333	1.68979	1.07616	0.922136	1.33822
pnpla4	1	complement(32097179..32111924)	ENSDARG00000069834	-1.42137	-0.50728	0.733076	1.31815	0.398511	0.93592	1.87357	0.905791	0.453895	1.30733	0.386352	1.6443	0.900944	0.380066	0.609875	0.720086	0.510373	1.53617	0.898841	1.42189	1.19223
pudp	1	32341484..32385665	ENSDARG00000027826	1.19417	0.256008	0.792939	1.25984	0.333244	0.901892	1.05499	0.0772354	0.964755	4.00145	4.12815	3.17414	4.32442	3.55336	4.0728	3.20587	3.83436	6.28344	4.0017	4.74777	3.75976
nlgn4xa	1	32521469..32693950	ENSDARG00000079455	1.24203	0.312697	0.837591	1.39214	0.477307	0.902642	1.12086	0.16461	0.935325	0.52083	0.17316	0.230302	0.504746	0.416393	0.269967	0.498051	0.222391	0.3825	0.373013	0.708092	0.379323
zgc:174320	1	32791920..32793644	ENSDARG00000078810	5.93203	2.56853	0.678796	3.08408	1.62484	0.93592	-1.92344	-0.943689	0.861566	0	0	0	0	0	0	0	0.16575	0.0997779	0	0	0
prkx	1	33217911..33283689	ENSDARG00000060716	1.1251	0.170059	0.816156	-1.15403	-0.206684	0.93592	-1.29841	-0.376743	0.533174	4.23433	2.9946	2.77064	3.9428	3.52224	3.50156	2.83112	2.50826	3.23554	2.37699	2.41806	3.32957
mxra5a	1	33322174..33334732	ENSDARG00000074815	1.50005	0.585013	0.249494	1.50403	0.588836	0.420189	1.00265	0.00382354	0.996515	3.29187	1.51923	1.43567	1.48585	1.83865	2.0949	3.43596	1.59266	2.46393	2.38344	2.78949	2.89583
gyg2	1	complement(33336923..33353778)	ENSDARG00000033380	1.66709	0.737331	0.236394	1.07357	0.10241	0.983156	-1.55285	-0.634922	0.351625	4.8099	2.66035	2.13335	2.69893	2.27069	4.73472	5.18524	3.7146	2.87778	2.69263	3.67959	2.85052
cd99	1	complement(33353174..33380340)	ENSDARG00000051975	1.03401	0.04825	0.969314	-1.17297	-0.23016	0.93592	-1.21286	-0.27841	0.746366	69.2331	67.8074	43.8033	57.6428	53.8979	59.3615	41.7597	39.7543	54.3679	43.3087	43.5243	50.0228
dhrsx	1	33383644..33487375	ENSDARG00000079280	-1.56637	-0.647422	0.322504	-1.29021	-0.367603	0.884496	1.21404	0.279819	0.790676	1.45454	2.45632	2.66796	2.58554	1.44982	1.11296	1.16572	0.946406	1.7295	1.64692	2.02982	1.29841
creb1a	1	complement(33547532..33557915)	ENSDARG00000053586	-1.02234	-0.0318739	0.969314	1.23663	0.306411	0.846577	1.26425	0.338285	0.558641	12.9518	8.35587	8.31789	7.7702	6.35405	8.4068	6.95351	6.60258	12.0767	10.2367	10.691	9.88696
chmp2bb	1	33558555..33569245	ENSDARG00000002190	-1.15817	-0.211844	0.787396	-1.17387	-0.231269	0.93592	-1.01356	-0.0194254	0.982173	60.6369	53.2822	43.1965	45.48	36.8055	46.2149	26.2117	28.3051	56.2344	30.6093	35.1022	41.6241
htr1fb	1	33634186..33635304	ENSDARG00000053580	#N/A	#N/A	#N/A	#N/A	#N/A	#N/A	#N/A	#N/A	#N/A	0	0	0	0	0	0	0	0	0	0	0	0
cldng	1	complement(33645044..33647169)	ENSDARG00000003701	-1.08169	-0.113286	0.969314	-2.74885	-1.45883	0.876444	-2.54126	-1.34554	0.716677	0.32043	0	0.125945	0.18402	0	0.249137	0	0.156368	0	0	0.0968087	0.0811723
znf654	1	33647682..33663705	ENSDARG00000079350	-1.0419	-0.0592184	0.941229	-1.04891	-0.0688881	0.982781	-1.00673	-0.00966966	0.988422	6.68287	3.57965	4.83126	4.11205	3.43467	3.64957	4.41864	2.80987	4.80276	3.47	4.18229	4.44393
arl13b	1	33668236..33694795	ENSDARG00000012763	-1.00941	-0.0135112	0.985255	1.26111	0.334692	0.884496	1.27297	0.348203	0.680016	2.55106	1.4984	1.72965	1.86794	1.4184	1.73554	1.66861	1.12041	2.97888	1.83618	2.08097	2.15684
nsun3	1	33697170..33722780	ENSDARG00000013023	1.05927	0.0830708	0.969314	-1.20307	-0.266718	0.938267	-1.27437	-0.349789	0.803381	2.2362	1.79072	1.19082	1.11853	1.3841	1.28998	1.45687	1.16166	1.33501	0.92993	1.373	1.3157
epha6	1	33969015..34201195	ENSDARG00000022971	-2.14917	-1.10378	0.451196	-1.37926	-0.463892	0.93592	1.55821	0.639889	0.758658	0.189232	0.111847	0.545436	0.253573	0.128365	0.0326954	0.0772076	0.138516	0.222356	0.0361402	0.304911	0.175768
arl6	1	34203817..34233938	ENSDARG00000032056	-1.13137	-0.178072	0.854272	1.47067	0.556473	0.676569	1.66387	0.734545	0.220326	2.12607	1.27792	1.57216	1.52105	1.00571	1.37286	1.29014	0.817695	2.25476	2.01302	1.99231	2.60162
slc5a7a	1	34243650..34261993	ENSDARG00000074860	-1.07395	-0.102927	0.944294	-1.1421	-0.191689	0.962177	-1.06346	-0.0887618	0.968622	0.877169	0.900477	1.57869	1.11355	0.442913	1.22043	0.890017	0.709666	0.854409	0.93241	0.690424	1.15782
kctd12.2	1	34295925..34297403	ENSDARG00000053542	1.04567	0.0644334	0.940751	1.12557	0.170653	0.93592	1.0764	0.10622	0.893747	22.8274	22.2338	17.534	22.2956	18.437	19.6859	15.8645	15.8857	30.2471	21.3455	19.3058	19.425
si:dkey-24h22.5	1	complement(34321574..34335752)	ENSDARG00000094556	3.57803	1.83917	0.797268	1.0556	0.0780585	0.995172	-3.38958	-1.76111	0.821071	0	0	0	0	0	0	0.131012	0	0	0	0	0
lmo7b	1	complement(34365845..34450784)	ENSDARG00000053535	-1.17469	-0.232283	0.83263	1.08973	0.123966	0.980917	1.28009	0.356248	0.74077	1.56345	0.828299	1.64121	1.44536	1.31369	0.667096	1.01519	0.628041	1.52907	0.65545	1.98733	1.37654
klf12a	1	34496855..34558804	ENSDARG00000015312	1.08809	0.121796	0.894783	1.04654	0.0656333	0.991841	-1.0397	-0.0561625	0.975134	2.4728	2.2948	2.4798	2.13017	2.31793	1.54529	2.43979	1.70857	2.21998	2.58201	1.88517	2.42371
pibf1_1	1	complement(34593490..34685007)	ENSDARG00000015506	-1.19702	-0.259446	0.71789	-1.05187	-0.0729569	0.986813	1.13799	0.186489	0.830312	9.65818	8.95744	7.66554	8.11482	5.91359	7.27592	5.44525	4.14483	9.33268	7.33078	5.30108	8.88973
pibf1_2	1	complement(34616054..34685329)	ENSDARG00000013006	-1.90087	-0.926662	0.232351	-1.56193	-0.643328	0.760024	1.217	0.283334	0.842126	2.77354	2.54377	2.0863	2.34803	0.375357	1.22695	1.40477	1.0151	2.10714	1.80829	0.606787	1.34463
gpalpp1	1	34685405..34694365	ENSDARG00000058287	-1.11984	-0.163298	0.872302	-1.16138	-0.215843	0.937047	-1.03709	-0.0525452	0.982173	9.71011	7.07155	5.23414	6.69172	4.65782	7.28007	5.28474	3.09693	8.61851	5.60316	2.76599	6.32519
gtf2f2a	1	34695373..34706903	ENSDARG00000069910	-1.09583	-0.132019	0.842511	1.04803	0.0676835	0.98442	1.14846	0.199703	0.778105	13.1927	14.2671	15.2998	11.9891	10.4314	9.52479	9.38278	9.65694	15.7789	10.8398	10.9062	16.5816
CR339054.7	1	34696503..34727517	ENSDARG00000109513	#N/A	#N/A	#N/A	#N/A	#N/A	#N/A	#N/A	#N/A	#N/A	0	0	0	0	0	0	0	0	0	0	0	0
tpt1	1	complement(34707932..34713868)	ENSDARG00000092693	1.05646	0.0792418	0.937123	-1.07276	-0.101323	0.978424	-1.13333	-0.180565	0.848216	2922.19	2854.67	2490.36	2405.86	2322.75	2241.6	1866.73	2332.56	2187.15	2417.69	2270.87	2354.34
si:dkey-151m22.8	1	complement(34748695..34750169)	ENSDARG00000095934	-1.35955	-0.443132	0.90971	-2.80755	-1.48931	0.896203	-2.06505	-1.04618	0.821071	0	0.0967831	0.514883	0.0940379	0.190417	0	0	0.159814	0	0	0.197884	0
zgc:172122	1	34763539..34807059	ENSDARG00000079191	-1.60077	-0.678764	0.797268	-1.26331	-0.337204	0.976382	1.26713	0.34156	0.920808	1.03373	0.130928	0.261199	0.572463	0	0.17223	0.745629	0.0540488	0.780871	0.190376	0.46847	0
BX897691.1	1	complement(34954697..35113974)	ENSDARG00000105033	-2.54363	-1.34689	0.633803	2.93116	1.55147	0.795662	7.45578	2.89836	0.109195	0	0	0.393534	0.632499	0	0	0	0.268727	0.617659	0.344194	1.81496	0.0253635
sc:d189	1	35194454..35234700	ENSDARG00000102858	-1.08923	-0.123308	0.957066	-1.50398	-0.588785	0.900246	-1.38077	-0.465477	0.790022	0.781459	1.03925	0.614306	0.392687	1.05073	0.253163	0.269021	0.45285	0.258258	0.447738	0.472191	0.56914
usp38	1	35473219..35491005	ENSDARG00000075798	-1.02714	-0.0386352	0.969314	-1.0157	-0.0224757	0.995172	1.01126	0.0161595	0.983261	2.8192	1.81169	2.43185	2.51006	1.78221	1.86831	1.71959	1.84203	2.75132	1.67489	2.29798	2.09937
gab1	1	35494837..35609659	ENSDARG00000037018	-1.19226	-0.253695	0.652355	-1.2629	-0.33674	0.779972	-1.05925	-0.0830451	0.922805	11.0523	10.6273	11.301	10.3258	7.91643	7.49319	7.18077	5.96018	9.71675	7.64025	6.77508	8.05454
frem3	1	complement(35614089..35653560)	ENSDARG00000074677	1.6563	0.727968	0.327242	2.08794	1.06208	0.131197	1.2606	0.334112	0.769749	4.68049	1.11804	2.7738	1.81751	1.85071	1.30103	4.97577	4.39353	5.14003	3.91833	4.67084	5.72257
si:dkey-27h10.2	1	complement(35662474..35695724)	ENSDARG00000094485	-1.53993	-0.622869	0.638638	1.4048	0.490365	0.901892	2.1633	1.11323	0.243397	1.26209	0.731623	0.629623	0.669055	0.71972	0.301935	0.445623	0.213194	1.79674	0.458902	1.27591	0.848481
hhip	1	35790082..35835863	ENSDARG00000060397	-1.5166	-0.600837	0.31903	1.02162	0.0308618	0.995172	1.54939	0.631699	0.279684	3.84572	2.69539	3.21718	2.43987	1.31444	1.63646	1.21656	1.94009	2.90828	2.97014	1.93122	3.71253
si:ch211-194g2.4	1	35862550..35867943	ENSDARG00000094648	#N/A	#N/A	#N/A	#N/A	#N/A	#N/A	#N/A	#N/A	#N/A	0	0	0	0	0	0	0	0	0	0	0	0
smad1	1	complement(35896488..35929143)	ENSDARG00000027199	-1.32748	-0.40869	0.420519	1.0833	0.115433	0.963003	1.43806	0.524123	0.230412	10.5767	7.20531	12.0297	10.1042	6.28376	6.92384	5.52941	4.70428	9.90523	9.01558	10.4744	10.5786
BX276105.1	1	35949269..35954313	ENSDARG00000115856	-1.30599	-0.385145	0.801835	-1.13774	-0.186165	0.979787	1.14789	0.198979	0.924923	1.47339	0.618768	1.28015	1.40284	0.473434	1.32646	0.711892	0.340582	1.1618	0.33323	1.476	0.942933
mmaa	1	35956435..35970259	ENSDARG00000060383	1.21818	0.284732	0.698745	-1.2309	-0.299708	0.901892	-1.49946	-0.58444	0.276498	8.82419	9.07514	8.82349	9.1826	7.63454	7.73908	11.0818	8.00943	6.47016	8.97916	5.63054	5.95503
zgc:152968	1	35985813..36002774	ENSDARG00000037002	1.12734	0.172927	0.969314	2.22359	1.15289	0.93592	1.97242	0.979967	0.861566	0	0.0120854	0	0	0	0	0.0125138	0	0.0360395	0	0	0
znf827	1	complement(36017867..36152131)	ENSDARG00000076171	1.18302	0.24247	0.659088	-1.08772	-0.121306	0.952109	-1.28679	-0.363776	0.452438	3.63401	2.04408	3.45652	2.60085	2.93006	2.69744	2.93292	2.17788	2.81558	2.04752	2.55737	2.52812
BX324156.2	1	complement(36188184..36218748)	ENSDARG00000113986	#N/A	#N/A	#N/A	#N/A	#N/A	#N/A	#N/A	#N/A	#N/A	0	0	0	0	0	0	0	0	0	0	0	0
lsm6	1	36194761..36204000	ENSDARG00000036995	1.55373	0.635733	0.126829	1.04693	0.0661638	0.98775	-1.48408	-0.569569	0.186778	31.6694	26.5256	19.3283	33.7245	34.6995	32.4185	40.6144	29.0062	32.2575	26.944	24.8095	25.64
pou4f2	1	36436936..36440301	ENSDARG00000069737	-1.11659	-0.159103	0.969314	1.28415	0.36081	0.979647	1.43387	0.519913	0.880616	0.0370341	0.0328339	0.0436688	0.0638052	0	0.0863831	0	0.0271086	0.0979129	0	0.0671327	0.0562896
si:ch211-163g19.2	1	complement(36447498..36472785)	ENSDARG00000095555	#N/A	#N/A	#N/A	#N/A	#N/A	#N/A	#N/A	#N/A	#N/A	0	0	0	0	0	0	0	0	0	0	0	0
ednraa	1	36612660..36702355	ENSDARG00000011876	1.31577	0.395911	0.471901	1.34895	0.431837	0.653878	1.02521	0.0359262	0.982173	6.16969	5.3699	8.69452	7.0324	8.76047	7.01999	6.80354	5.53504	8.28851	7.79195	9.10403	8.9773
tmem184c	1	36722122..36746569	ENSDARG00000078789	-1.3651	-0.449009	0.314159	1.02296	0.0327452	0.995172	1.39644	0.481754	0.260662	7.77663	4.68092	4.42759	4.82728	2.62654	2.77127	3.44704	3.33453	4.9721	4.29182	5.68368	5.48993
prmt9	1	complement(36746078..36772147)	ENSDARG00000036755	-1.04275	-0.0603945	0.969314	1.00453	0.00652389	0.996524	1.04748	0.0669184	0.979185	1.303	1.73283	1.672	1.4856	1.50409	1.57923	0.985082	0.673258	2.09399	1.05396	1.00732	1.77661
arhgap10	1	36771954..36913091	ENSDARG00000078326	1.01514	0.0216821	0.969314	-1.11035	-0.15101	0.93592	-1.12716	-0.172692	0.808797	14.8529	9.02831	11.112	9.83847	8.70968	9.73291	9.01264	7.78349	10.0156	9.35616	8.08238	9.81265
nr3c2	1	complement(36935154..37087966)	ENSDARG00000102082	-1.80635	-0.853081	0.387795	-1.0609	-0.0852828	0.995172	1.70267	0.767798	0.484112	0.973871	0.595462	1.42553	0.520715	0.322176	0.287211	0.585742	0.294978	0.621498	0.577222	0.821807	0.969803
dclk2a	1	37195465..37310490	ENSDARG00000034093	1.36157	0.445275	0.628421	1.11952	0.162879	0.969484	-1.21621	-0.282396	0.814941	0.483728	0.405684	0.693716	0.360391	0.581522	0.579402	0.444069	0.421073	0.61065	0.528089	0.473982	0.38749
fam193a	1	37312580..37362246	ENSDARG00000102787	-1.05564	-0.0781186	0.91761	-1.10804	-0.148007	0.936299	-1.04964	-0.0698886	0.94472	4.4451	3.94096	4.76034	2.99674	3.18388	3.79003	2.77958	2.21633	3.9174	3.10048	2.66645	3.88404
tnip2	1	complement(37372919..37377509)	ENSDARG00000074501	-1.15239	-0.20463	0.845272	1.25205	0.32429	0.927088	1.44285	0.52892	0.557075	4.27234	2.94606	2.79874	3.73877	2.95727	2.68906	2.30343	1.48919	4.96044	3.5552	2.08981	5.61756
scpp1	1	complement(37379063..37383741)	ENSDARG00000090416	1.13227	0.179218	0.918119	-1.83579	-0.876397	0.725476	-2.0786	-1.05561	0.328302	2.78714	3.80952	1.64323	1.0004	1.68808	1.234	1.67022	3.3436	0.579953	2.62823	0.736799	0.500118
sparcl1	1	37391141..37419873	ENSDARG00000074989	-2.40237	-1.26446	0.394592	-2.28126	-1.18983	0.669999	1.05309	0.0746313	0.982173	0.24998	0.123127	0.425771	0.167489	0.0484495	0.172766	0.0509967	0.0203315	0.122391	0.0477422	0.0503495	0.14776
si:dkeyp-13d11.1_1	1	complement(37697373..37701128)	ENSDARG00000076343	-1.83241	-0.87374	0.766604	-5.57932	-2.48009	0.553798	-3.04481	-1.60635	0.664192	0.608858	0.809706	0	0.39337	0.663777	0	0	0.111419	0.134144	0.130817	0	0
si:dkey-6f10.4_1	1	37701261..37704183	ENSDARG00000077519	1.98821	0.991467	0.797268	1.71361	0.777036	0.947005	-1.16025	-0.214431	0.977686	0.0850354	0	0.10027	0	0.0741645	0	0.0780637	0.12449	0.0749405	0.219245	0	0
GALNTL6	1	37752171..38132612	ENSDARG00000040048	-1.69585	-0.762008	0.730154	1.31089	0.390543	0.95507	2.22307	1.15255	0.54635	0.0696287	0.123464	0.0821028	0.0999681	0.0202425	0.0360913	0.106534	0.0169892	0.0818171	0.19947	0.0420726	0.141109
galnt7	1	38142354..38170906	ENSDARG00000057303	-1.20831	-0.272991	0.735398	-1.36579	-0.449731	0.788577	-1.13033	-0.17674	0.86417	22.8833	19.5129	14.6669	14.4144	13.0957	13.2963	10.4332	9.48661	19.3016	10.3605	8.60483	11.3528
CU462871.1	1	38151262..38170575	ENSDARG00000113575	#N/A	#N/A	#N/A	#N/A	#N/A	#N/A	#N/A	#N/A	#N/A	0	0	0	0	0	0	0	0	0	0	0	0
hmgb2a	1	complement(38169512..38171787)	ENSDARG00000029722	-1.04261	-0.0602025	0.961675	1.2121	0.277511	0.901892	1.26375	0.337714	0.659646	265.512	239.75	194.552	225.66	171.057	225.91	156.825	146.105	367.318	250.512	195.25	245.699
hand2	1	complement(38193147..38195012)	ENSDARG00000008305	1.49272	0.57794	0.514573	1.27315	0.348398	0.925523	-1.17246	-0.229542	0.863533	2.39063	1.86259	1.70843	1.68495	2.8432	2.19669	1.7291	2.12111	1.72377	2.42813	1.77282	3.08306
fbxo8	1	complement(38346043..38361496)	ENSDARG00000007477	1.06818	0.0951511	0.940295	1.3089	0.388359	0.875499	1.22536	0.293208	0.779309	4.84688	2.84542	4.63395	4.11886	3.8845	2.1898	5.11091	2.54104	4.84871	3.26488	5.6397	6.22209
cep44	1	38362348..38374799	ENSDARG00000053106	1.32059	0.401182	0.794833	1.5731	0.653608	0.854465	1.19121	0.252426	0.875358	0.378425	0.575153	0.509966	0.419129	0.565795	0.672523	0.496285	0.237431	0.762287	0.789841	0.538985	0.698436
hpgd	1	complement(38398696..38415158)	ENSDARG00000012016	-1.63202	-0.706658	0.379009	-1.0049	-0.00704665	0.996034	1.62407	0.699611	0.398622	7.91243	6.50175	5.23388	4.07302	2.27225	4.35141	2.12597	2.54275	9.1841	3.48301	2.88611	7.03985
glra3	1	complement(38416106..38538284)	ENSDARG00000011066	1.86785	0.901375	0.842511	-1.02966	-0.0421662	0.995172	-1.92324	-0.943542	0.861566	0.0315581	0	0	0	0	0.0245367	0.0289708	0	0	0	0.0286031	0
gpm6ab	1	complement(38649141..38756904)	ENSDARG00000004621	1.21534	0.281364	0.647995	1.17255	0.229645	0.91128	-1.0365	-0.0517197	0.972736	16.4298	15.1879	20.3796	14.2845	16.9081	15.9027	13.7116	15.998	15.9031	17.159	19.7262	19.1577
wdr17	1	38758261..38803495	ENSDARG00000075098	-2.04942	-1.03521	0.667844	-1.24054	-0.310966	0.977904	1.65204	0.724247	0.821071	0.108984	0.0772987	0.102807	0.0187765	0.0190103	0	0.100049	0	0.0960458	0.0187327	0.0592673	0.0496946
asb5b	1	complement(38804961..38816685)	ENSDARG00000053222	-1.06468	-0.0904218	0.927018	1.19874	0.261521	0.920559	1.27628	0.351943	0.650274	16.7336	17.8716	20.6456	21.2606	16.3412	13.8645	7.94773	17.3091	18.2773	18.4347	25.3559	23.7155
spcs3	1	38818268..38822167	ENSDARG00000089976	1.18879	0.249493	0.695775	1.11146	0.152456	0.93799	-1.06957	-0.0970369	0.914319	51.7071	54.2911	40.34	50.5981	50.4104	60.3648	38.2898	36.82	55.7563	52.8966	42.1931	55.0854
vegfc	1	complement(38850830..38908197)	ENSDARG00000069640	1.95364	0.966161	0.230346	1.00016	0.000226114	0.999861	-1.95333	-0.965935	0.222402	1.23447	0.820847	1.67397	0.957077	2.53014	1.63168	1.24659	1.58134	0.761545	1.27313	1.23077	0.985068
CU915762.1	1	38858399..38859425	ENSDARG00000104657	1.72593	0.787378	0.830094	-1.05414	-0.0760628	0.995172	-1.81937	-0.863441	0.827524	0.115754	0	0.136492	0.099715	0.100956	0.36	0	0	0	0.0994823	0	0.175939
tenm3	1	39387876..39779913	ENSDARG00000005479	-1.22939	-0.297937	0.607179	1.04208	0.0594629	0.990041	1.28112	0.3574	0.525589	2.61626	1.45149	1.67497	1.73525	1.28089	1.0982	1.42927	0.922293	1.95912	1.67602	1.93485	1.59794
dctd	1	complement(39813229..39859626)	ENSDARG00000036990	-1.50675	-0.591445	0.491218	1.01396	0.0200041	0.995172	1.52779	0.611449	0.48731	3.7964	5.41173	3.59878	3.52686	2.46707	3.299	1.91342	1.08978	6.03541	2.55901	2.8337	4.63887
irf2a	1	39859782..39880189	ENSDARG00000007387	1.05519	0.0775027	0.952943	-1.28205	-0.358456	0.89212	-1.35281	-0.435959	0.602282	4.17379	5.00646	3.24242	3.59546	4.36826	3.85602	3.65129	1.76122	2.89937	2.57425	3.11539	3.20927
tmem134	1	complement(39878634..39895918)	ENSDARG00000024828	1.35676	0.440164	0.351632	-1.07828	-0.108737	0.968644	-1.46297	-0.548901	0.183162	3.04141	3.29941	2.78438	2.71763	3.42696	3.18724	3.60713	2.51667	2.63041	2.50023	2.53404	2.65593
stox2a	1	complement(39898327..39977551)	ENSDARG00000070162	1.30628	0.385461	0.511729	-1.10161	-0.139616	0.95637	-1.43901	-0.525077	0.286133	1.64898	1.7621	1.84138	1.0348	1.75248	1.76607	1.39349	1.48681	1.57834	1.10746	1.23723	1.42746
ing2	1	complement(39981451..39983730)	ENSDARG00000104907	1.92918	0.947988	0.0344336	1.18128	0.240351	0.93592	-1.63313	-0.707637	0.159353	6.84253	6.06648	4.43317	5.31145	8.13192	7.60018	10.6303	8.09091	7.48808	6.39763	5.72475	5.60012
sod3b	1	39990547..39992042	ENSDARG00000079183	1.47444	0.560163	0.30283	-1.14893	-0.200295	0.93592	-1.69403	-0.760458	0.0932857	13.9571	7.44181	10.9333	12.4436	14.6415	17.6057	8.60162	10.4308	12.9023	8.3882	7.69629	7.26912
aip	1	39995008..40009814	ENSDARG00000104437	1.0736	0.102458	0.884895	1.03939	0.0557377	0.990713	-1.03291	-0.0467207	0.974597	31.1161	30.947	22.5788	32.9903	22.3832	29.9312	27.2222	20.7813	32.1683	27.2563	26.4549	29.357
cdk2ap2	1	complement(40010103..40016058)	ENSDARG00000103145	1.3889	0.473947	0.515205	-1.13102	-0.177629	0.953718	-1.57088	-0.651576	0.283525	9.32566	8.99043	6.19213	8.26746	9.55485	13.0233	9.1429	4.90432	7.50044	7.2366	5.00581	7.50006
lgi2b	1	40023640..40028859	ENSDARG00000069701	-1.0246	-0.0350594	0.979279	1.51058	0.595104	0.89212	1.54774	0.630163	0.683201	0.708037	0.87883	0.751395	0.60993	0.185257	0.880809	0.974982	0.259138	0.811178	0.851909	1.2193	1.29141
ccdc149b	1	40034061..40053012	ENSDARG00000020857	-1.4036	-0.489133	0.71789	-1.22631	-0.294318	0.939647	1.14458	0.194815	0.919575	0.665193	0.547625	0.672311	0.654883	0.538715	0.295539	0.305328	0.278237	0.460605	0.408346	0.387583	0.649963
si:dkey-117m1.4	1	complement(40057412..40086978)	ENSDARG00000093120	-1.0783	-0.108756	0.952277	1.12264	0.166901	0.977354	1.21055	0.275657	0.861566	2.21415	0.49968	1.42408	0.901656	0.49155	0.93901	1.3674	0.736697	0.993387	0.726561	1.75141	1.5909
cntf	1	complement(40095123..40102836)	ENSDARG00000074662	-1.45368	-0.539711	0.640623	-1.8761	-0.90774	0.52511	-1.29059	-0.368029	0.812146	6.06421	1.48316	3.45203	4.5034	1.18546	1.78844	2.20762	2.75521	1.47429	1.52758	2.4639	1.98647
si:ch211-113e8.11	1	40107811..40115242	ENSDARG00000076585	-1.11518	-0.15728	0.842511	-1.02571	-0.0366208	0.995172	1.08723	0.120659	0.888968	4.65887	4.32454	4.46118	3.90559	2.39979	3.62232	3.35838	2.7694	4.43647	3.95022	3.85422	3.58813
si:ch211-113e8.10	1	complement(40116572..40140424)	ENSDARG00000079631	1.09857	0.135627	0.842511	-1.13176	-0.178568	0.93592	-1.24332	-0.314194	0.602668	7.44214	7.08172	7.76463	6.81373	4.7916	8.66435	6.40276	5.33349	7.79484	5.99414	4.7323	5.62619
zgc:152658	1	40140498..40146782	ENSDARG00000018587	-2.37084	-1.2454	0.0385987	1.64673	0.719601	0.589935	3.90412	1.965	3.68624e-05	17.6432	9.66357	2.85055	8.91451	1.84948	4.28679	4.04917	2.57672	19.7723	20.8492	4.95879	12.9248
zgc:194443	1	40148193..40150415	ENSDARG00000078182	-1.20149	-0.26483	0.842511	1.41963	0.505513	0.870801	1.70568	0.770343	0.407085	3.86023	3.42243	1.85788	4.004	3.22933	1.77632	2.38661	1.32633	6.9428	4.87483	1.42807	4.61004
si:ch211-113e8.9	1	40156907..40177693	ENSDARG00000095065	-2.17722	-1.12249	0.125536	-1.3006	-0.379176	0.922244	1.67401	0.743311	0.438232	2.86376	1.21044	1.13869	1.83587	0.667979	0.750831	0.366834	0.658124	2.43575	0.80132	0.694175	1.18941
AL953865.1	1	complement(40181404..40208237)	ENSDARG00000109438	1.86781	0.901346	0.844639	-1.02979	-0.0423531	0.995172	-1.92345	-0.943699	0.86417	0	0	0.156797	0	0.231951	0	0	0	0.117189	0	0	0
si:ch211-113e8.6	1	complement(40186407..40189893)	ENSDARG00000074610	1.22408	0.291702	0.969314	3.08399	1.6248	0.93592	2.51943	1.3331	0.86417	0	0	0	0	0	0	0	0	0	0	0	0.213077
si:ch211-113e8.5	1	40199074..40201140	ENSDARG00000069707	-1.69373	-0.760203	0.488334	-1.34871	-0.431582	0.929413	1.25581	0.328621	0.841255	14.1934	6.11802	1.47944	3.37755	3.89833	3.47527	3.16745	0.918402	3.17894	2.69573	3.48262	7.56846
TESK1	1	complement(40210840..40227166)	ENSDARG00000078251	1.26075	0.33428	0.802096	-1.23983	-0.310147	0.93592	-1.56312	-0.644427	0.591151	0.626933	0.229998	0.841215	0.465572	0.28282	0.55468	0.912915	0.363962	0.266728	0.390168	0.352694	0.558597
faah2a	1	40237276..40258430	ENSDARG00000008457	1.1707	0.227372	0.797268	1.05438	0.0763907	0.990175	-1.11032	-0.150981	0.883454	3.43699	3.22643	2.50316	3.17846	2.7772	3.45826	2.6448	2.51584	4.45437	2.69321	2.79449	2.45836
TXN	1	40263671..40270561	ENSDARG00000031435	1.17206	0.22905	0.789422	-1.10391	-0.142618	0.963367	-1.29385	-0.371668	0.629952	263.308	304.634	253.507	300.634	345.607	288.37	242.518	174.801	332.221	223.157	198.956	212.918
vwa10.1	1	40291054..40307806	ENSDARG00000077874	-1.22755	-0.295777	0.82655	1.2341	0.303461	0.93592	1.51492	0.599238	0.602282	2.47408	0.767719	2.09074	1.81158	1.97798	1.47477	0.492102	0.5433	2.58011	1.52384	1.19595	2.88301
vwa10.2	1	40308077..40329641	ENSDARG00000069710	1.20624	0.270519	0.822574	1.74873	0.80631	0.515646	1.44974	0.535791	0.603237	2.13222	0.843407	2.63025	2.34542	3.60484	1.98938	1.32501	0.624306	4.04728	2.98837	2.79479	3.01648
maml3	1	complement(40336160..40519340)	ENSDARG00000079552	-1.66076	-0.731848	0.453544	-1.22186	-0.28908	0.93592	1.35921	0.442768	0.738764	0.991523	0.311337	0.901224	0.605013	0.234208	0.256973	0.379263	0.393134	0.546135	0.284047	0.542953	0.72213
scoca	1	40562540..40569613	ENSDARG00000087333	1.11895	0.16215	0.821216	-1.03481	-0.04936	0.995015	-1.1579	-0.21151	0.778141	11.0824	7.09355	8.92441	9.31399	9.05272	9.33126	8.8835	4.86734	9.71916	5.34304	8.81976	9.03859
clgn	1	complement(40572757..40608392)	ENSDARG00000009315	1.29749	0.375721	0.481746	1.20053	0.26367	0.890074	-1.08076	-0.112051	0.888558	10.2954	6.95277	13.4676	10.9821	10.1367	12.3198	10.5958	9.12577	10.2073	12.2699	11.5184	11.9502
naa15b	1	40613292..40641467	ENSDARG00000030368	1.26419	0.338215	0.537838	1.1625	0.217234	0.916893	-1.08747	-0.120981	0.873727	12.7567	9.19744	11.6274	9.47338	9.11174	11.486	12.6868	9.0963	12.05	10.6484	11.0306	12.6199
CU550714.1	1	40724140..40752950	ENSDARG00000052899	#N/A	#N/A	#N/A	#N/A	#N/A	#N/A	#N/A	#N/A	#N/A	0	0	0	0	0	0	0	0	0	0	0	0
zgc:153642	1	complement(40733921..40735381)	ENSDARG00000052900	1.22408	0.291702	0.969314	3.08424	1.62491	0.93592	2.51963	1.33321	0.86417	0	0	0	0	0	0	0	0	0	0	0.0786482	0
htra3a	1	40740951..40759629	ENSDARG00000052895	1.75	0.807352	0.338354	-1.32666	-0.407793	0.911454	-2.32164	-1.21515	0.068648	1.07005	0.673266	1.91298	1.51648	2.58904	2.5496	0.950636	1.03594	1.0647	0.711974	1.03243	0.813208
gpr78a	1	40760448..40799856	ENSDARG00000074600	-1.16583	-0.22136	0.93225	1.43365	0.519695	0.93592	1.6714	0.741055	0.71991	0.0265712	0.188461	0.156657	0.206005	0.254918	0.0413187	0.0487854	0.0583495	0.163918	0.159852	0.337164	0.141353
cpz	1	40801448..40818900	ENSDARG00000075521	-1.08697	-0.120313	0.893521	1.09171	0.126587	0.969484	1.18665	0.2469	0.778569	5.92546	2.40782	5.67695	3.82831	3.01464	2.90343	3.79642	2.82381	3.20937	3.92547	5.06293	5.39442
hmx4	1	complement(40909750..40911332)	ENSDARG00000007941	-1.05749	-0.0806423	0.973543	-2.27303	-1.18462	0.901892	-2.14946	-1.10397	0.76373	0.161193	0.142911	0.19007	0.0694287	0.281171	0	0.147977	0	0	0.0692666	0	0.122501
hmx1	1	complement(40912613..40914752)	ENSDARG00000095651	-2.59456	-1.37549	0.842511	-3.00868	-1.58913	0.93592	-1.15961	-0.213643	0.982173	0	0	0.0901459	0	0	0	0	0	0	0	0	0
adra2c	1	complement(40992682..40994259)	ENSDARG00000069669	-2.05013	-1.03572	0.629512	1.06504	0.0909104	0.995172	2.18348	1.12663	0.602465	0.150671	0.46754	0.266496	0.129794	0.0657047	0.0585741	0.138318	0.11029	0.265569	0.258982	0.204844	0.286264
lrpap1	1	41131481..41141446	ENSDARG00000033604	1.22376	0.291317	0.579707	1.34804	0.430863	0.519536	1.10156	0.139546	0.849332	15.3429	12.5106	12.4792	13.1687	14.3094	15.0204	12.5942	9.6323	19.542	13.6192	16.7992	17.7881
dok7	1	complement(41142881..41192206)	ENSDARG00000060236	-1.15715	-0.210574	0.842511	-1.8826	-0.912726	0.235528	-1.62693	-0.702152	0.335665	3.3566	1.94851	6.12538	5.71415	2.92749	2.60978	3.04472	2.89575	1.93687	1.44238	2.86121	2.21686
rgs12b	1	complement(41201586..41287914)	ENSDARG00000036774	-1.14395	-0.194029	0.73811	-1.153	-0.205391	0.90669	-1.00791	-0.0113622	0.986064	7.16361	6.10122	6.60898	5.82817	4.64248	5.23456	4.3233	3.41083	6.62008	4.26117	4.74939	5.2677
htt	1	complement(41293964..41374117)	ENSDARG00000052866	-1.13801	-0.186517	0.772979	-1.11078	-0.151573	0.93592	1.02452	0.034944	0.982173	3.24217	2.07274	3.0428	2.36544	1.80818	2.02351	2.06523	1.42878	2.82812	1.85761	1.73916	2.52261
si:ch211-89o9.4	1	41454210..41464007	ENSDARG00000093237	-1.31161	-0.391342	0.669204	1.42665	0.512634	0.805602	1.87122	0.903977	0.125021	3.76142	8.60466	12.9773	7.76055	8.54566	5.74076	3.19726	2.92328	9.94466	7.1438	12.29	16.1632
paip2b	1	41465771..41472087	ENSDARG00000008706	1.07629	0.106064	0.898326	1.02369	0.0337811	0.995172	-1.05138	-0.0722825	0.952013	52.0302	51.6276	46.8026	46.3392	41.2792	51.5699	38.7749	35.5529	49.2479	52.5148	42.6022	42.915
dok1a	1	41478345..41484861	ENSDARG00000078108	-1.08591	-0.118908	0.92369	-1.55535	-0.637237	0.676523	-1.4323	-0.518329	0.581015	6.17556	5.60552	5.46144	4.36988	3.46248	7.60246	3.50953	1.50682	4.34099	1.9587	2.66538	4.24626
si:ch211-89o9.6	1	41487339..41492776	ENSDARG00000075639	1.26029	0.333761	0.730154	1.06038	0.0845806	0.990746	-1.18853	-0.249181	0.827615	1.95955	2.46119	1.30934	1.35043	1.53814	1.62514	2.30858	1.62562	2.21622	1.74023	1.27285	1.91114
dtx4b	1	41498188..41530541	ENSDARG00000078016	-1.30332	-0.382191	0.788616	-1.35213	-0.435232	0.926899	-1.03745	-0.0530413	0.982173	0.809806	0.430777	0.795736	0.325545	0.188341	0.377779	0.59473	0.237108	0.309257	0.278388	0.391455	0.594914
si:dkey-56e3.2	1	41588071..41593446	ENSDARG00000092551	-1.67363	-0.742984	0.271269	-1.79271	-0.842145	0.314466	-1.07115	-0.0991609	0.95244	22.5784	21.566	35.1546	22.1363	14.4698	13.5784	16.4902	4.38289	24.2953	5.25314	9.38414	16.4005
si:dkey-56e3.3	1	41596099..41606109	ENSDARG00000075194	-1.28083	-0.357077	0.664529	-1.21362	-0.279322	0.933512	1.05537	0.0777551	0.963458	4.95785	3.81592	4.36848	4.83407	3.0886	2.75341	2.80085	2.35293	3.69709	1.91975	4.74052	3.56079
mogs	1	41609254..41620873	ENSDARG00000060252	1.2487	0.320424	0.652965	1.19767	0.260235	0.914454	-1.0426	-0.0601885	0.971964	3.02146	2.74144	1.54178	2.34404	2.91259	2.91248	2.38445	1.40978	3.76837	2.76377	2.0499	2.30965
fbxo41	1	41666611..41755499	ENSDARG00000078908	-1.10222	-0.140417	0.969314	1.35196	0.435055	0.971194	1.49016	0.575472	0.866601	0.0387103	0	0.228227	0	0.0675233	0.0300976	0	0.0566712	0.0341149	0.0665375	0.105257	0.0882561
rnf24	1	complement(41770842..41817784)	ENSDARG00000036965	1.20858	0.273317	0.833897	1.83525	0.875976	0.480903	1.51851	0.602659	0.567443	8.72116	1.45768	8.85062	4.18743	5.54882	2.77901	7.02179	5.44193	6.80386	4.54627	11.1441	16.1349
smox	1	41849152..41865986	ENSDARG00000036967	-1.58452	-0.664049	0.145919	1.31327	0.393159	0.789616	2.0809	1.05721	0.00259863	23.2091	32.663	29.2107	20.2037	11.7191	10.8652	14.1743	15.2005	30.4009	27.0013	37.0232	36.1305
si:dkey-37g12.1	1	41886830..41924484	ENSDARG00000060264	-1.08967	-0.123885	0.963411	1.44112	0.527188	0.908417	1.57034	0.651073	0.683201	0.155969	0.0967958	0.128738	0.107486	0.0680149	0.0848871	0.143182	0.0570838	0.164944	0.0804264	0.113092	0.284476
adra1d	1	complement(41957210..41982582)	ENSDARG00000024101	-1.16548	-0.220923	0.849157	-1.27927	-0.355322	0.933454	-1.09764	-0.134399	0.935841	0.884802	1.04594	1.83822	0.689611	0.716569	0.507766	1.04433	0.709349	0.742632	0.488843	0.821046	1.21677
ctnna2	1	42224769..43039672	ENSDARG00000024785	1.2192	0.285931	0.734939	1.02454	0.0349813	0.995172	-1.18999	-0.250949	0.805361	0.544038	0.647346	0.725912	0.912644	0.555651	0.573269	0.887153	0.707383	0.542539	0.69519	0.642323	0.843225
si:ch211-71k14.1	1	complement(42281308..42289744)	ENSDARG00000087061	-13.2607	-3.72909	0.435143	-1.77022	-0.823928	0.93592	7.49102	2.90516	0.623665	0	0.295505	0.262013	0.191415	0	0	0	0	0	0.0954844	0.100699	0.168869
lrrtm1	1	complement(42776553..42779075)	ENSDARG00000052713	1.2838	0.360415	0.788134	1.42395	0.509896	0.883249	1.10917	0.149481	0.935325	0.659656	0.459518	1.16675	0.730611	0.7808	0.769333	0.692084	0.689803	1.03812	0.93138	0.683301	1.21749
suclg1	1	complement(43652480..43684584)	ENSDARG00000052712	1.05847	0.0819842	0.932308	-1.05517	-0.0774752	0.986036	-1.11687	-0.159459	0.86417	303.928	268.234	385.639	374.849	246.941	300.833	286.771	270.402	265.642	285.819	313.001	308.143
cisd2	1	43686251..43692141	ENSDARG00000052703	1.74946	0.806906	0.0534072	1.13014	0.1765	0.93592	-1.548	-0.630406	0.170817	6.33344	8.19681	5.23625	6.45925	9.71423	12.5655	7.48493	6.98067	8.66107	6.00622	6.07031	7.57945
SLC9B2	1	complement(43695033..43727613)	ENSDARG00000052700	1.13666	0.184801	0.91244	1.30231	0.381068	0.93592	1.14573	0.196267	0.919575	0.175684	0.259598	0.138105	0.168156	0.0851248	0.242837	0.16128	0.171465	0.292453	0.218093	0.176926	0.237359
bdh2	1	complement(43714149..43727576)	ENSDARG00000052696	-1.10738	-0.147152	0.844336	1.1213	0.165178	0.937306	1.24171	0.31233	0.664192	18.8738	13.2503	9.46597	11.5502	7.59739	12.5497	9.01602	8.25176	18.1385	10.8627	14.5522	12.1368
tacr3a	1	complement(43801957..43892349)	ENSDARG00000075112	#N/A	#N/A	#N/A	#N/A	#N/A	#N/A	#N/A	#N/A	#N/A	0	0	0	0	0	0	0	0	0	0	0	0
cnga1a	1	complement(43894238..43899422)	ENSDARG00000029898	3.18922	1.6732	0.688822	-1.04091	-0.0578522	0.995172	-3.3197	-1.73105	0.698077	0	0.040631	0	0	0	0.142529	0	0	0.0403881	0	0	0
enam	1	complement(43901966..43905263)	ENSDARG00000092730	-2.28109	-1.18972	0.614384	1.27839	0.354323	0.977455	2.91611	1.54404	0.482967	54.3535	158.537	0.940785	14.3473	12.0904	44.6641	17.2123	11.8264	158.381	126.853	1.98864	0.454756
scpp5	1	complement(43909933..43915567)	ENSDARG00000078622	7.35798	2.87931	0.110958	2.24927	1.16945	0.901892	-3.27128	-1.70985	0.422363	0.125136	0.55472	0	0	0	3.01613	0	1.46558	0.441123	0.215091	0.226838	0.760798
scpp7	1	complement(43917934..43920576)	ENSDARG00000074132	-1.49545	-0.580581	0.800206	1.06136	0.0859097	0.995172	1.58721	0.666491	0.795174	95.608	240.166	5.94772	18.8619	27.2953	112.128	23.9945	39.3556	181.246	174.583	7.27325	7.23107
ambn	1	complement(43926153..43933271)	ENSDARG00000075598	1.64659	0.719478	0.712152	1.14183	0.191347	0.988347	-1.44206	-0.528131	0.822222	6.19893	2.74794	1.17895	2.58387	1.83122	12.9044	0.367142	1.6101	5.9036	5.75717	0.815586	0.455903
si:dkey-22i16.7	1	complement(43945629..43948826)	ENSDARG00000094910	1.12667	0.172063	0.969314	-3.0085	-1.58904	0.93592	-3.38958	-1.76111	0.821071	0	0	0	0.167881	0	0	0	0.142653	0	0	0	0
odam	1	complement(43958198..43963441)	ENSDARG00000074476	2.09638	1.0679	0.657392	-1.53278	-0.616155	0.952368	-3.21329	-1.68405	0.468798	0.286457	0.126984	0.506664	0	0.249836	0.668168	0.262971	0.209683	0	0	0.389451	0.108849
scpp9	1	complement(43969797..43973068)	ENSDARG00000087178	-1.69844	-0.764207	0.842386	1.06711	0.0937073	0.995172	1.81242	0.857915	0.828588	0.261561	0	0.46263	0.112659	0.342185	0	0	0	0.46102	0.112396	0	0.198778
si:dkey-22i16.9	1	complement(43973880..43983405)	ENSDARG00000095949	-1.09756	-0.134306	0.948795	1.15807	0.211727	0.975336	1.27106	0.346033	0.849678	9.31869	0.390938	4.71416	2.86153	0.3333	4.70835	3.94001	2.66823	5	2.80432	4.66269	5.1383
CR385050.1	1	complement(43985417..43987873)	ENSDARG00000076277	-1.35366	-0.436863	0.842511	-1.00958	-0.0137482	0.995873	1.34082	0.423115	0.86417	1.00916	0.0596473	0.555313	0.289777	0.117354	0.47078	0.123523	0.295479	0.77078	0.11564	0.365868	0.46016
zgc:66472	1	complement(43988715..44001011)	ENSDARG00000075916	1.22729	0.295481	0.72682	1.01523	0.0218101	0.995172	-1.20888	-0.273671	0.770039	3.11815	2.07338	3.21718	2.05188	2.03965	2.76111	2.66372	2.34586	2.59532	1.97265	2.15889	2.96212
si:dkey-22i16.10	1	44003654..44009286	ENSDARG00000078558	-4.3718	-2.12823	0.730154	-5.0696	-2.34187	0.901892	-1.15961	-0.213643	0.982173	0	0	0	0.108196	0	0	0	0	0	0	0	0
si:ch73-109d9.1	1	complement(44011472..44025066)	ENSDARG00000052019	1.14773	0.198784	0.844507	1.06211	0.0869379	0.990176	-1.08061	-0.111846	0.93869	3.26592	3.76417	3.27336	3.72774	3.13325	4.12633	2.69834	2.68945	3.23799	3.22784	3.18212	4.3435
si:ch73-109d9.3	1	complement(44027611..44037843)	ENSDARG00000101106	-1.12148	-0.165405	0.871832	-1.00245	-0.00352693	0.997714	1.11874	0.161878	0.888242	1.21606	0.996467	1.08631	1.09518	0.433883	0.974152	0.879559	0.755276	1.13665	0.760086	0.918497	1.27424
si:ch73-109d9.2	1	complement(44040211..44048798)	ENSDARG00000103871	1.25956	0.332919	0.687445	1.10307	0.141528	0.969484	-1.14186	-0.191391	0.86417	2.92245	3.68889	3.62124	2.47484	2.50565	3.96678	3.13757	2.93688	3.66684	3.66103	2.91818	2.86092
si:ch73-109d9.4	1	44053641..44062209	ENSDARG00000089345	-2.75907	-1.46418	0.418436	-1.19122	-0.252444	0.979787	2.31617	1.21174	0.569904	0.874114	0.154995	1.23686	1.05419	0	0.407779	0.320979	0.127969	0.616275	0.60099	0.792265	0.53144
CU915778.1	1	44056129..44064229	ENSDARG00000099025	1.0905	0.124996	0.969314	1.1899	0.250844	0.985216	1.09115	0.125848	0.982173	0.542829	0	0.960116	0.467613	0.473434	0.633081	0.249162	0.198673	0.478387	0.466522	0.738	0.412533
vwa11	1	complement(44074445..44084071)	ENSDARG00000098805	1.13157	0.178325	0.969314	-1.90558	-0.930228	0.93592	-2.15629	-1.10855	0.813277	0.0783648	0	0	0.202519	0.20504	0	0.07194	0	0	0	0	0.11911
cabp2a	1	44127292..44141442	ENSDARG00000052016	2.97709	1.5739	0.519675	2.02685	1.01924	0.913447	-1.46882	-0.55466	0.855275	0.0687165	0	0.0810271	0.059195	0.119864	0.106855	0.189248	0.1006	0.181677	0.118114	0.124564	0
slc43a3a	1	complement(44141758..44161417)	ENSDARG00000059682	2.75315	1.46108	0.0333003	2.09336	1.06582	0.320074	-1.31518	-0.395263	0.766258	1.24851	0.673769	1.02412	1.35608	1.18358	5.23347	1.8438	1.2715	1.91355	1.25961	2.6076	2.64021
ctnnd1	1	44173245..44229065	ENSDARG00000078233	1.03195	0.0453761	0.969314	-1.22408	-0.291701	0.901892	-1.26319	-0.337077	0.674014	29.2683	24.5095	24.1852	21.2536	21.2788	26.8454	18.0524	14.6286	28.2522	16.6252	14.0099	17.6728
si:ch211-165a10.9	1	44236341..44238912	ENSDARG00000104759	#N/A	#N/A	#N/A	#N/A	#N/A	#N/A	#N/A	#N/A	#N/A	0	0	0	0	0	0	0	0	0	0	0	0
si:dkey-59p5.2	1	44239558..44241485	ENSDARG00000075179	#N/A	#N/A	#N/A	#N/A	#N/A	#N/A	#N/A	#N/A	#N/A	0	0	0	0	0	0	0	0	0	0	0	0
si:ch211-165a10.11	1	44246467..44248675	ENSDARG00000104249	#N/A	#N/A	#N/A	#N/A	#N/A	#N/A	#N/A	#N/A	#N/A	0	0	0	0	0	0	0	0	0	0	0	0
si:ch211-165a10.10	1	44249616..44251595	ENSDARG00000111029	#N/A	#N/A	#N/A	#N/A	#N/A	#N/A	#N/A	#N/A	#N/A	0	0	0	0	0	0	0	0	0	0	0	0
si:ch211-165a10.8	1	44256883..44259377	ENSDARG00000105108	#N/A	#N/A	#N/A	#N/A	#N/A	#N/A	#N/A	#N/A	#N/A	0	0	0	0	0	0	0	0	0	0	0	0
si:dkey-59p5.1	1	44260085..44262063	ENSDARG00000112081	#N/A	#N/A	#N/A	#N/A	#N/A	#N/A	#N/A	#N/A	#N/A	0	0	0	0	0	0	0	0	0	0	0	0
si:ch211-165a10.1	1	44336897..44339528	ENSDARG00000109574	#N/A	#N/A	#N/A	#N/A	#N/A	#N/A	#N/A	#N/A	#N/A	0	0	0	0	0	0	0	0	0	0	0	0
CT033803.2	1	44340124..44342519	ENSDARG00000115729	#N/A	#N/A	#N/A	#N/A	#N/A	#N/A	#N/A	#N/A	#N/A	0	0	0	0	0	0	0	0	0	0	0	0
si:ch211-165a10.3	1	44347388..44350014	ENSDARG00000116661	#N/A	#N/A	#N/A	#N/A	#N/A	#N/A	#N/A	#N/A	#N/A	0	0	0	0	0	0	0	0	0	0	0	0
CT033803.1	1	44350628..44353023	ENSDARG00000111422	#N/A	#N/A	#N/A	#N/A	#N/A	#N/A	#N/A	#N/A	#N/A	0	0	0	0	0	0	0	0	0	0	0	0
si:ch211-165a10.5_1	1	44357737..44360359	ENSDARG00000111051	#N/A	#N/A	#N/A	#N/A	#N/A	#N/A	#N/A	#N/A	#N/A	0	0	0	0	0	0	0	0	0	0	0	0
si:ch211-165a10.5_2	1	44360973..44363210	ENSDARG00000112750	#N/A	#N/A	#N/A	#N/A	#N/A	#N/A	#N/A	#N/A	#N/A	0	0	0	0	0	0	0	0	0	0	0	0
CT583626.1	1	complement(44374034..44413629)	ENSDARG00000113452	#N/A	#N/A	#N/A	#N/A	#N/A	#N/A	#N/A	#N/A	#N/A	0	0	0	0	0	0	0	0	0	0	0	0
timm10	1	44390470..44394499	ENSDARG00000069116	1.7122	0.775855	0.0488422	-1.07191	-0.100181	0.975891	-1.83533	-0.876037	0.0142096	25.5149	17.4398	25.884	27.9962	32.6959	38.457	28.7881	29.3192	20.7272	22.0507	23.5134	17.0074
unc93b1	1	44395976..44418225	ENSDARG00000069114	-1.47927	-0.564882	0.582519	-1.11008	-0.150661	0.979647	1.33258	0.414221	0.744113	6.72501	1.73586	3.76415	2.30994	1.18791	1.32374	3.20405	1.65127	2.25063	1.20714	3.24054	5.1755
cryba1l2	1	complement(44421920..44434707)	ENSDARG00000014803	1.98817	0.991441	0.787331	1.7135	0.77695	0.938134	-1.16029	-0.214491	0.975031	0.0692367	0.0613843	0	0	0	0.0538322	0.127121	0.0506806	0.0610174	0	0.125507	0.0526178
crybb1l2	1	44439661..44448387	ENSDARG00000016793	-1.29099	-0.368479	0.882042	-2.18649	-1.12862	0.850492	-1.69365	-0.760138	0.787797	0.17651	0.27386	0.052033	0.190065	0	0.205857	0.0810193	0.129204	0.0388889	0.0758488	0.159982	0.0335356
rtn4rl2a	1	44491077..44495902	ENSDARG00000052012	1.45405	0.540076	0.679399	1.02826	0.0402092	0.995172	-1.41408	-0.499867	0.736744	0.477907	0.423706	0.246542	0.591801	0.234457	0.441248	0.493566	0.787103	0.526466	0.513408	0.297796	0.363195
zdhhc5a	1	44523516..44566433	ENSDARG00000016263	1.15736	0.210842	0.726085	-1.03542	-0.0502124	0.991841	-1.19835	-0.261055	0.666437	5.82284	5.33201	6.64049	4.64988	4.94871	6.46051	5.38447	3.6867	6.59241	4.6573	3.96784	5.1035
tmx2b	1	complement(44569282..44581937)	ENSDARG00000007786	1.57098	0.651669	0.089795	-1.12167	-0.165644	0.93592	-1.76212	-0.817313	0.0136718	9.00132	5.28971	7.56394	6.32804	9.50493	11.3158	9.2448	4.7965	7.05132	4.68308	4.50122	7.15525
med19b	1	44582369..44591489	ENSDARG00000009472	1.28973	0.36707	0.660722	1.0701	0.097744	0.984251	-1.20524	-0.269326	0.795429	7.47416	9.04424	5.59755	5.91648	7.57574	8.48125	6.39777	6.21033	8.63414	8.33318	6.13349	5.14282
slc43a1b	1	complement(44591492..44638058)	ENSDARG00000037748	-1.3172	-0.397479	0.486546	-1.84605	-0.884442	0.0237507	-1.40149	-0.486963	0.348624	16.8936	14.673	26.1428	16.6778	10.6215	8.69186	13.8172	10.7888	9.38416	9.12456	9.7644	9.06533
si:dkey-28b4.8	1	complement(44651727..44704261)	ENSDARG00000002840	1.19946	0.262389	0.720583	1.14779	0.198859	0.93592	-1.04502	-0.0635305	0.964755	2.74703	1.61087	3.29018	1.71424	1.90536	2.10221	2.16439	2.35913	2.84029	1.58011	2.68586	2.82738
si:dkey-28b4.7	1	complement(44707054..44710937)	ENSDARG00000079632	-1.10797	-0.147916	0.842511	1.32294	0.403745	0.697188	1.46577	0.551661	0.207406	44.0149	39.1972	31.5108	53.9966	22.2788	36.8192	30.8459	29.9171	74.9819	44.9203	41.8525	50.9216
ssrp1b	1	44710955..44737931	ENSDARG00000016994	1.17668	0.234728	0.797268	1.41647	0.502301	0.710503	1.20378	0.267573	0.775091	4.83683	2.24248	4.39525	3.28743	3.56056	3.03614	3.58481	3.11825	4.41906	4.08063	4.86656	5.73297
p2rx3b	1	44746154..44758388	ENSDARG00000029718	-1.64223	-0.715655	0.551577	1.13831	0.186897	0.97732	1.86937	0.902552	0.40755	1.74465	0.791375	1.24389	1.2932	0.67234	0.410098	1.15465	0.207894	2.00237	0.697394	0.441289	2.37425
si:dkey-9i23.4	1	44767657..44770055	ENSDARG00000051993	1.49611	0.581221	0.75326	1.22067	0.287668	0.970161	-1.22565	-0.293553	0.897922	2.19522	1.64682	0	0.727324	1.03093	1.31292	1.24015	1.73048	2.08343	1.7415	1.07136	0.384992
si:dkey-9i23.5	1	44780849..44783558	ENSDARG00000092459	-1.85596	-0.892169	0.667844	-1.00596	-0.00857752	0.997608	1.84496	0.883592	0.695106	1.76992	0.653826	0.347834	0.254112	0	0.344032	0.812404	0.107964	0.519935	0.507039	0.802095	0.896723
si:dkey-9i23.6	1	complement(44784793..44796531)	ENSDARG00000094678	-1.29545	-0.373457	0.733591	-1.10671	-0.146281	0.978543	1.17054	0.227176	0.86417	4.93002	2.25303	2.63693	2.10156	1.37415	2.13391	1.63303	1.82296	4.88225	1.83457	1.01345	2.39477
tmem187	1	44800298..44801179	ENSDARG00000051989	1.54002	0.622948	0.64468	1.47057	0.556378	0.901892	-1.04722	-0.0665701	0.982173	1.07827	1.19497	3.17862	1.85773	4.23192	1.57194	1.36107	1.57857	3.20715	3.1276	1.95461	1.63891
si:dkey-9i23.8	1	complement(44802794..44812014)	ENSDARG00000095407	-2.59447	-1.37544	0.842511	-3.00858	-1.58908	0.93592	-1.15961	-0.213643	0.982173	0	0.100378	0	0	0	0	0	0	0	0	0	0
ndufs8a	1	44814322..44823071	ENSDARG00000051986	1.26651	0.340855	0.646393	-1.05634	-0.0790769	0.98775	-1.33786	-0.419932	0.564177	337.769	429.484	300.646	322.762	340.143	352.525	330.24	362.937	293.813	304.494	388.372	238.912
STX3	1	44826316..44835738	ENSDARG00000051981	-2.93724	-1.55446	0.472171	-1.63138	-0.706093	0.93592	1.80046	0.848368	0.790009	0.184024	0.163153	0.433984	0.264209	0.106999	0	0	0.134704	0.324355	0.0527184	0.22239	0
kdm2aa	1	44838706..44869972	ENSDARG00000059653	-1.14915	-0.200572	0.755444	-1.36354	-0.447352	0.563093	-1.18656	-0.24678	0.709	11.6269	7.02645	9.14927	8.31931	6.31198	6.36493	7.12305	4.70699	7.48633	5.81197	4.62392	6.63611
tcirg1a	1	complement(44870880..44901163)	ENSDARG00000016835	-1.33536	-0.417231	0.597187	1.39357	0.478786	0.774467	1.86092	0.896017	0.0753089	2.4138	2.42328	2.72066	1.49834	1.54795	1.26957	1.53158	0.961388	2.97189	2.47108	2.57386	3.66882
wu:fc21g02	1	44906517..44926013	ENSDARG00000094133	-1.23068	-0.299459	0.71789	-1.42193	-0.507852	0.703636	-1.1554	-0.208393	0.839518	8.25463	6.66854	5.11101	4.3379	4.22511	6.91366	2.92582	1.77303	5.05577	3.61561	2.59982	4.82
si:dkey-9i23.15	1	complement(44925422..44928987)	ENSDARG00000093997	1.67472	0.743921	0.430758	-1.14655	-0.197305	0.969484	-1.92016	-0.941225	0.253279	14.9743	14.7511	3.04093	8.16965	9.21456	21.2155	11.6846	12.179	3.22585	3.43182	11.0839	15.932
si:dkey-9i23.14	1	complement(44930457..44933094)	ENSDARG00000093289	-4.37201	-2.1283	0.730154	-1.73518	-0.795085	0.961394	2.51963	1.33321	0.86417	0.149534	0	0.176323	0	0	0	0	0	0	0	0.135532	0
tmem176	1	complement(44935442..44940953)	ENSDARG00000078659	1.22048	0.287447	0.678796	1.26553	0.339738	0.855144	1.03691	0.0522913	0.97508	14.3404	12.7139	12.0082	15.1283	14.7729	13.3312	10.7797	12.779	13.6453	15.1824	19.308	15.6366
si:dkey-9i23.16	1	44941031..44946224	ENSDARG00000093954	-1.25164	-0.323817	0.804871	1.23352	0.302775	0.93592	1.54391	0.626592	0.588053	7.61297	3.50457	9.14948	5.92751	3.70293	2.2766	3.09121	6.32278	5.548	3.2714	9.28862	11.7938
vps37c	1	44949909..44963259	ENSDARG00000031836	1.04001	0.0565942	0.953	-1.07476	-0.104011	0.970161	-1.11776	-0.160605	0.839518	12.6927	10.6538	11.5464	12.1363	8.73051	12.3274	10.2506	7.37527	13.7806	10.721	7.2346	9.31458
tmem132a	1	44992207..44994299	ENSDARG00000105005	-6.14898	-2.62035	0.642436	-7.13043	-2.83399	0.854796	-1.15961	-0.213643	0.982173	0.617556	0	0	0.265993	0	0	0	0	0	0	0	0
dnaja1	1	45002971..45014434	ENSDARG00000030972	1.52886	0.612459	0.289439	-1.80208	-0.849661	0.162405	-2.75513	-1.46212	0.000137776	4.92276	2.83225	5.24892	3.65418	4.84154	5.25262	5.57684	3.94842	2.49225	1.80032	1.75625	2.38797
smu1b	1	complement(45012391..45042210)	ENSDARG00000051970	1.93719	0.953966	0.00629559	-1.69427	-0.760667	0.0942525	-3.28213	-1.71463	1.11725e-09	2.31006	3.82831	3.08012	2.2349	4.52543	5.36066	4.20872	3.66805	1.75394	1.66463	1.3851	1.60703
rps6	1	complement(45043767..45049603)	ENSDARG00000019778	1.12539	0.170426	0.842511	-1.00489	-0.00704248	0.995172	-1.1309	-0.177469	0.852293	2125.59	2020.19	1656.04	2061.36	1632.15	2066.45	1602.61	1649.61	1968.52	1781.77	1653.81	1923.71
btr01	1	45056371..45076434	ENSDARG00000051965	-1.92253	-0.943005	0.224374	-1.75243	-0.80936	0.54619	1.09706	0.133645	0.941908	3.41429	1.70616	1.97638	2.51339	1.19112	0.917059	0.911816	0.86337	1.9148	0.906977	0.618918	1.65121
si:ch211-151p13.8	1	45080897..45096935	ENSDARG00000087426	-1.00807	-0.0115897	0.993292	-1.28904	-0.366297	0.937885	-1.27873	-0.354708	0.86417	0.183692	0.271431	0.361002	0.237359	0.106806	0.166626	0.224843	0.291332	0.188866	0.15787	0.110995	0.279201
muc13a	1	45121393..45135878	ENSDARG00000069559	-2.18771	-1.12942	0.096218	-1.14578	-0.19633	0.963367	1.90937	0.933093	0.207406	4.10508	2.62477	1.87142	3.2865	0.585623	0.88989	1.9473	0.837791	5.27196	0.577074	1.43848	2.93418
si:ch211-239f4.6	1	complement(45138905..45146834)	ENSDARG00000093347	-1.12151	-0.165447	0.871353	-1.03737	-0.0529368	0.995172	1.08111	0.11251	0.935841	30.123	5.20856	13.3114	16.0259	8.94156	12.8524	10.0462	11.0038	16.8013	5.09851	13.3119	22.1047
mucms1	1	complement(45149844..45157243)	ENSDARG00000069566	1.12255	0.166784	0.945423	1.09381	0.129356	0.995172	-1.02628	-0.0374278	0.984517	28.097	0	18.6336	21.6902	13.2676	18.9397	16.1623	9.83939	22.7967	9.58004	11.8862	24.4923
zgc:111983	1	complement(45173421..45177401)	ENSDARG00000006588	-2.25836	-1.17528	0.241545	1.14042	0.189564	0.979819	2.57548	1.36484	0.131921	150.589	649.52	134.27	100.986	95.8171	138.989	105.67	51.124	717.422	300.68	70.5677	127.343
ddx39aa	1	complement(45205920..45215343)	ENSDARG00000006225	-1.01083	-0.0155432	0.979093	-1.03254	-0.0462012	0.995172	-1.02148	-0.0306579	0.982173	45.3036	44.8767	32.0519	42.1953	34.6399	35.7007	31.2077	26.9284	54.815	35.0709	25.9336	35.672
si:ch211-239f4.1	1	45217425..45282774	ENSDARG00000052766	-1.00699	-0.0100447	0.99627	-1.06677	-0.0932479	0.995172	-1.05937	-0.0832033	0.982173	0.196365	0.0348189	0.138927	0.0676626	0.0342524	0.152676	0	0.11499	0.0346108	0.168762	0.0711913	0.089539
si:ch73-90k17.1	1	complement(45316063..45320126)	ENSDARG00000095463	1.1084	0.148475	0.969314	-1.04677	-0.0659497	0.995172	-1.16024	-0.214425	0.982153	0	0.0803942	0.106924	0	0.0790862	0	0.0832441	0	0.0799137	0.0779316	0	0
emp1	1	45323142..45330451	ENSDARG00000069632	1.01655	0.0236866	0.990206	1.31421	0.394195	0.961691	1.29281	0.370508	0.888558	0.407401	0.361195	0.480387	0	0.355319	0.0633515	0.0747999	0.417498	0.359036	0.140052	0.369253	0.619224
zgc:101679	1	complement(45332641..45341851)	ENSDARG00000025518	1.0749	0.1042	0.92191	-1.10732	-0.147074	0.969014	-1.19026	-0.251274	0.812709	6.42592	7.32487	4.32979	5.21921	4.08323	5.49583	5.64626	4.63651	5.90577	4.65477	3.74414	5.65091
si:ch211-243a20.4	1	complement(45341934..45347393)	ENSDARG00000105481	-1.68567	-0.753323	0.649157	1.66393	0.734598	0.869916	2.80485	1.48792	0.186706	1.14307	1.4188	1.48264	0.984685	1.39572	0	0.94442	0.0836717	2.4177	1.47358	1.55406	2.51923
si:ch211-243a20.3	1	45351890..45366422	ENSDARG00000092240	1.09219	0.127222	0.856953	1.1699	0.226389	0.914086	1.07116	0.0991677	0.910118	37.6876	31.1571	32.5793	37.5807	28.9591	27.418	29.5916	31.756	31.5048	43.9501	37.6734	36.3774
grin2bb	1	complement(45372562..45553602)	ENSDARG00000030376	-1.07591	-0.105558	0.955185	1.18286	0.242277	0.955195	1.27265	0.347835	0.814789	0.267145	0.169176	0.180002	0.164378	0.144234	0.178035	0.163495	0.083806	0.313908	0.142128	0.19601	0.21269
atf7ip	1	complement(45570059..45616470)	ENSDARG00000069619	1.3283	0.409577	0.41059	1.03355	0.0476013	0.995096	-1.28518	-0.361975	0.51368	12.3833	14.9735	12.0333	11.4386	14.9121	15.985	13.8334	9.3047	16.2778	11.8991	10.3313	11.3158
sept3	1	complement(45616067..45636362)	ENSDARG00000030656	1.61519	0.691703	0.206718	1.19077	0.2519	0.93592	-1.35642	-0.439803	0.54888	2.88579	3.42241	3.62374	3.64818	2.90911	6.5272	5.53922	2.77077	2.84046	3.0599	4.85749	4.38622
BX511120.2	1	complement(45644345..45647846)	ENSDARG00000114294	#N/A	#N/A	#N/A	#N/A	#N/A	#N/A	#N/A	#N/A	#N/A	0	0	0	0	0	0	0	0	0	0	0	0
serhl	1	complement(45650285..45662774)	ENSDARG00000032340	1.35853	0.442049	0.473155	1.08259	0.114481	0.97233	-1.2549	-0.327568	0.66791	20.9433	12.8907	18.7436	30.1122	27.596	20.3838	26.4188	14.3928	21.1127	19.4236	24.2399	18.0346
trappc5	1	45663727..45669444	ENSDARG00000026068	1.12085	0.16459	0.808782	1.085	0.117701	0.962177	-1.03303	-0.0468891	0.975031	17.4421	14.9651	15.0697	17.3795	17.4556	15.2487	12.913	11.5907	18.2049	13.1251	18.1401	16.6762
mcoln1a	1	45671687..45700574	ENSDARG00000002285	-1.45104	-0.537088	0.353199	1.13046	0.176915	0.937885	1.64035	0.714003	0.139332	3.49023	2.70056	2.51919	2.45996	1.67884	1.9407	1.7671	0.743219	3.747	1.70886	2.49239	4.03497
si:ch211-214c7.4	1	45707219..45744854	ENSDARG00000069595	1.10248	0.140752	0.861434	1.13625	0.184282	0.93592	1.03063	0.0435303	0.981978	2.51175	1.16776	1.824	1.84708	1.72313	1.28606	1.95433	1.30046	2.13259	1.69798	2.19327	1.64115
si:ch211-214c7.5	1	complement(45744118..45752261)	ENSDARG00000060187	#N/A	#N/A	#N/A	#N/A	#N/A	#N/A	#N/A	#N/A	#N/A	0	0	0	0	0	0	0	0	0	0	0	0
pkn1a	1	45754868..45836167	ENSDARG00000060184	-1.11854	-0.161622	0.800546	-1.04891	-0.0688954	0.982781	1.06638	0.0927268	0.909202	6.87814	4.98399	6.76515	5.68296	4.88848	4.17798	4.44728	3.43717	6.35304	4.84553	5.03523	5.31514
map2k7	1	45839927..45856178	ENSDARG00000008279	-3.01474	-1.59203	0.348928	-1.65416	-0.726102	0.920212	1.82251	0.86593	0.728427	0.834242	0.369813	2.16414	0.646783	0.0727593	0	0.459507	0.42746	0.220562	0	0.756127	1.268
pnpla6	1	complement(45866692..45920632)	ENSDARG00000010773	-1.14368	-0.19368	0.764364	-1.51572	-0.600005	0.208309	-1.32531	-0.406325	0.420367	7.67161	7.67872	7.98703	5.52029	5.03143	5.15998	6.28807	3.52086	5.40602	3.32276	4.55273	4.66184
lipt1	1	45922699..45924004	ENSDARG00000025233	1.42001	0.505905	0.504995	-1.17667	-0.23471	0.93592	-1.67089	-0.740615	0.223927	5.64359	5.72984	3.54199	8.23336	6.27173	7.1481	6.35077	6.39647	4.8934	4.30265	4.78513	4.77319
eif5b	1	45925150..45959721	ENSDARG00000016548	1.621	0.696883	0.147829	1.0916	0.12644	0.969484	-1.48498	-0.570443	0.286506	13.5774	13.8935	15.5926	12.1024	17.8846	21.0443	16.849	14.7837	14.499	15.0389	13.2146	13.2425
arhgef7b	1	45958904..46020725	ENSDARG00000073848	-1.5576	-0.639325	0.0876246	-1.03244	-0.0460539	0.995015	1.50866	0.593271	0.116435	14.4839	9.56572	11.026	11.9419	6.24487	6.68566	6.75328	4.09246	12.6492	8.48592	9.77911	11.6534
si:ch211-138g9.2	1	46026457..46030577	ENSDARG00000052677	-2.60069	-1.37889	0.846287	3.44071	1.78271	0.871295	8.94822	3.1616	0.57535	0	0.0503809	0	0	0	0	0	0	0	0.0488376	0	0.172743
sox1b	1	46194333..46196107	ENSDARG00000008131	1.2764	0.352077	0.875835	-1.06682	-0.09332	0.995172	-1.36169	-0.445397	0.86417	0.334872	0.178135	0.157946	0.0576942	0.233649	0.208293	0.18445	0.0980491	0.118047	0.230238	0.121406	0.152695
si:ch211-138g9.3	1	complement(46238774..46244523)	ENSDARG00000053340	1.22408	0.291702	0.969314	3.08424	1.62491	0.93592	2.51963	1.33321	0.86417	0	0	0	0	0	0	0	0	0	0	0.0573738	0
atp11a	1	complement(46263473..46401385)	ENSDARG00000008413	-1.06506	-0.0909414	0.899711	-1.123	-0.167358	0.93592	-1.0544	-0.0764163	0.935325	9.68363	6.07684	6.84074	6.59412	5.63364	5.74702	5.89963	4.08602	7.19064	4.08108	5.92415	7.08423
tubgcp3	1	46404968..46452686	ENSDARG00000029133	-1.13793	-0.186407	0.793	-1.0113	-0.0162053	0.995172	1.12522	0.170202	0.827615	3.89537	2.4018	3.77897	2.48621	2.13109	2.79465	2.09684	1.54233	3.6982	2.49562	2.45538	2.83925
mcf2la	1	46493944..46594288	ENSDARG00000075859	1.47939	0.565002	0.387368	2.34201	1.22775	0.00456243	1.58309	0.662745	0.249359	2.79682	1.84055	2.34592	1.68899	1.93634	2.33148	3.52042	2.17388	3.6845	2.27977	5.90615	7.03388
si:busm1-105l16.2_1	1	complement(46500436..46505310)	ENSDARG00000070858	1.12543	0.170474	0.915027	-1.27633	-0.352006	0.93592	-1.43642	-0.52248	0.710688	2.80866	5.84636	2.08789	4.31299	4.52643	4.22509	1.84971	3.08386	3.01332	4.93262	2.43498	0.556825
cab39l	1	46598502..46617283	ENSDARG00000036658	1.18694	0.247243	0.652142	1.13506	0.18277	0.93592	-1.0457	-0.0644729	0.94526	22.4027	16.2849	18.8627	16.6766	16.2051	20.1425	17.1546	15.0514	19.7432	16.516	20.6258	21.3288
cdadc1	1	complement(46617006..46632966)	ENSDARG00000036650	1.10224	0.140435	0.869363	-1.30837	-0.387768	0.835187	-1.44213	-0.528203	0.384873	6.14286	8.61566	5.58095	7.54717	6.36759	6.14633	5.96279	5.93392	6.34547	6.05826	3.46838	4.36226
rcbtb1	1	complement(46635236..46650041)	ENSDARG00000036645	1.25179	0.323998	0.672841	1.15766	0.21121	0.93592	-1.08132	-0.112788	0.919233	3.76091	3.3727	2.24283	2.97912	2.78999	3.86525	3.05572	2.53145	3.8478	3.04647	3.13449	3.54809
arl11	1	46652615..46654528	ENSDARG00000036637	1.57652	0.656745	0.58993	-1.24337	-0.314261	0.939327	-1.96021	-0.971006	0.343938	1.1801	1.26652	0.439426	1.2841	1.02924	1.93166	0.912293	1.36393	1.20422	0.800692	0.281473	0.944042
ebpl	1	complement(46660213..46663997)	ENSDARG00000036636	-1.18422	-0.243942	0.886746	-1.15945	-0.213441	0.976382	1.02137	0.0305016	0.985561	3.31928	2.28887	1.30465	1.69443	1.71552	2.3896	0.902858	0.719906	2.92524	2.64137	0.557125	0.747423
kpna3	1	complement(46666696..46706639)	ENSDARG00000052641	1.2964	0.37451	0.578813	1.02134	0.0304683	0.995172	-1.26931	-0.344041	0.644466	32.1135	29.7104	47.4035	35.9373	37.422	41.6374	36.2776	32.5177	33.9352	31.458	35.0626	37.9186
spryd7a	1	complement(46710647..46718353)	ENSDARG00000052624	1.06052	0.0847689	0.913221	1.06747	0.0941941	0.976169	1.00655	0.00942516	0.989763	13.7014	9.73581	11.9982	10.0672	8.78661	10.5746	9.34104	8.62812	12.6963	7.96566	12.6924	11.8673
si:ch73-160h15.3	1	complement(46830809..46832880)	ENSDARG00000094160	-1.24306	-0.313897	0.840171	-1.32725	-0.408442	0.93592	-1.06773	-0.0945457	0.97706	2.69336	1.56448	1.42367	1.68012	1.05302	1.87748	0.852602	0.815799	2.37362	0.957828	0.336713	1.5528
agpat3	1	complement(46837849..46875493)	ENSDARG00000036549	1.13142	0.178135	0.831995	1.3145	0.394514	0.813985	1.16181	0.216379	0.813693	35.1698	31.5025	36.073	24.7917	25.3375	34.7449	26.5031	26.2416	33.2314	47.0138	32.6571	41.022
pdxkb	1	complement(46888033..46924801)	ENSDARG00000036546	-1.06244	-0.0873842	0.969314	-2.05739	-1.04082	0.800388	-1.93647	-0.953431	0.603237	0.994114	0.220342	0.879158	0.35682	0.505766	0.257644	0.380254	0.545761	0.365041	0	0.225257	0.440706
tmprss3b	1	46948010..46957351	ENSDARG00000036545	1.12664	0.172029	0.969314	-3.00858	-1.58908	0.93592	-3.38959	-1.76111	0.821071	0	0.107548	0	0	0.105798	0	0	0	0	0	0	0
pknox1.2	1	complement(46963993..46984142)	ENSDARG00000036542	1.33098	0.412488	0.796603	1.27214	0.347257	0.93592	-1.04625	-0.0652312	0.982173	2.66616	0.764752	2.49655	1.55367	1.43623	1.15842	3.81534	1.2628	0.621967	1.34787	4.05121	2.38377
si:dkey-22n8.3	1	complement(46985884..46989650)	ENSDARG00000089853	1.2128	0.278347	0.843027	-1.02672	-0.0380494	0.995172	-1.24522	-0.316396	0.851513	1.55525	2.41301	2.29235	2.84697	3.47585	2.64517	1.16004	1.56534	1.19929	2.17202	1.05722	3.98906
itsn1	1	complement(46999441..47089818)	ENSDARG00000000086	-1.40273	-0.488233	0.552837	-1.33618	-0.41811	0.870777	1.04981	0.0701228	0.97481	4.3505	0.855109	4.83953	2.12133	1.53921	1.62746	2.22297	1.20171	2.36914	1.28747	2.25056	2.35492
cryzl1	1	47089501..47105214	ENSDARG00000026902	-1.11425	-0.156069	0.868957	1.14067	0.189885	0.939446	1.27099	0.345955	0.695106	5.05358	4.05372	3.97263	5.23438	2.99083	2.61947	3.03761	4.05147	5.30196	4.91194	4.52585	4.84643
setd4	1	complement(47106268..47114319)	ENSDARG00000036592	1.28379	0.360404	0.690616	1.20061	0.263768	0.93592	-1.06928	-0.0966362	0.951883	3.41023	3.65998	4.09173	3.81386	2.13939	4.46566	5.27266	3.37214	4.05991	3.13652	6.23605	3.36463
mhc1zea	1	complement(47116121..47122141)	ENSDARG00000001470	-1.26169	-0.335355	0.680024	-1.20352	-0.267259	0.93592	1.04833	0.0680961	0.971964	50.2236	28.9854	36.4899	26.318	27.5797	33.6587	16.3001	10.9753	37.0087	17.5852	13.5898	43.823
mhc1zca	1	complement(47140788..47151790)	ENSDARG00000069471	1.61411	0.690736	0.410611	1.27018	0.345039	0.935711	-1.27077	-0.345698	0.777061	50.1718	34.1684	56.2759	32.4032	53.1447	57.3936	51.298	53.3969	42.1079	9.95055	85.3806	68.1201
mhc1zba	1	complement(47155424..47161996)	ENSDARG00000036588	-1.04743	-0.0668491	0.969314	1.45422	0.540241	0.870801	1.52318	0.60709	0.607093	282.844	312.288	212.106	435.462	177.951	29.0062	379.029	324.812	390.79	501.298	494.769	281.107
cbr1	1	47165842..47173403	ENSDARG00000036587	1.54836	0.630742	0.0962713	1.0336	0.0476775	0.99434	-1.49803	-0.583065	0.12954	14.0374	9.80073	9.68997	7.78446	11.5797	14.0748	12.6718	11.2386	12.2164	6.23315	10.47	11.0236
morc3b	1	47178529..47202163	ENSDARG00000043271	-1.2557	-0.328496	0.798471	-2.71327	-1.44003	0.0595105	-2.16075	-1.11153	0.162983	7.09964	4.96561	6.32517	2.2425	2.44241	6.99204	1.81043	1.79003	1.45992	0.610162	1.42997	3.68693
bcl9	1	47331644..47411186	ENSDARG00000036687	1.10147	0.13943	0.842511	-1.12875	-0.174731	0.93592	-1.24329	-0.314161	0.59933	6.06416	4.61033	7.15056	6.00883	4.24758	5.46004	6.17271	4.6229	5.82884	4.83365	4.07241	4.93094
gja5b	1	complement(47414734..47431453)	ENSDARG00000069450	-1.2567	-0.329641	0.859208	1.12892	0.174939	0.985745	1.41871	0.50458	0.805663	0.509302	0.0376283	0.700634	0.255927	0.222096	0.197993	0.194811	0.248536	0.299227	0.437708	0.423145	0.322545
gja8b	1	47446032..47448850	ENSDARG00000015076	-6.50769	-2.70215	0.644882	-7.54312	-2.91516	0.85958	-1.15911	-0.213016	0.982173	0	0	0.171017	0	0	0	0	0	0	0	0	0
fstl1a	1	47459723..47485360	ENSDARG00000015559	1.04236	0.059847	0.967889	1.2711	0.346073	0.872221	1.21945	0.286226	0.7527	13.0602	21.2747	13.1735	12.4027	9.33206	11.0108	12.7839	15.8373	15.1846	19.0002	21.6067	15.5458
lrrc58a	1	47486104..47492961	ENSDARG00000076773	3.30741	1.7257	0.551843	-1.73535	-0.795223	0.963367	-5.7395	-2.52093	0.420967	0	0	0.112592	0.0822548	0.249836	0.222723	0.087657	0	0	0	0	0.0725661
stn1	1	47499888..47513484	ENSDARG00000007734	1.17699	0.235097	0.808496	1.41455	0.500339	0.787556	1.20184	0.265242	0.806119	4.93012	2.67898	2.53162	3.08249	2.49669	3.58591	2.91995	3.08494	5.39602	3.89538	3.60361	4.65321
sh3pxd2aa	1	47585700..47686888	ENSDARG00000060148	-1.16587	-0.221407	0.853464	1.20032	0.263413	0.93592	1.39941	0.484821	0.672228	1.58805	0.474416	1.50618	0.817831	0.677463	0.523416	0.934928	0.694936	0.912735	0.415379	1.87742	1.57418
neurl1aa	1	complement(47701924..47771742)	ENSDARG00000069438	-3.08828	-1.6268	0.00251436	-1.26204	-0.335752	0.920212	2.44706	1.29105	0.0280803	1.81425	0.98145	2.35683	1.11255	0.295008	0.45426	0.508121	0.292613	1.11108	1.03067	0.891862	1.47225
cfap58	1	47831619..48012257	ENSDARG00000069435	3.39923	1.76521	0.391662	4.18489	2.06519	0.458883	1.23113	0.299981	0.938488	0.336557	0.132616	0.0881893	0.193282	0.0326146	0.290751	1.71647	0.0547459	0.0329559	0.0964155	2.47424	0.142096
SORCS3	1	48256950..48490034	ENSDARG00000103535	-2.14563	-1.1014	0.587191	-1.13326	-0.180474	0.990175	1.89334	0.92093	0.695106	0.0849989	0.0301435	0.0400906	0.117154	0.0593061	0.0132175	0.015606	0.0124437	0.044945	0.0584403	0.0770399	0.0516773
LO017711.1	1	complement(48581374..48615105)	ENSDARG00000112034	-1.08901	-0.123011	0.969314	1.84497	0.883598	0.809907	2.00918	1.00661	0.490951	0.156792	0.166811	0.147905	0.108053	0.109398	0.17067	0.0575748	0.068862	0.248721	0.107801	0.284221	0.357471
si:ch211-112b1.2	1	complement(48921944..48922273)	ENSDARG00000096191	-4.37168	-2.12819	0.730154	-1.73519	-0.795092	0.961394	2.51943	1.3331	0.86417	0.720482	0	0	0	0	0	0	0	0	0	0	0.273772
cxcl18b	1	complement(49222164..49225890)	ENSDARG00000075045	1.1543	0.207022	0.797268	1.23501	0.304525	0.893237	1.06992	0.0975036	0.930656	38.7627	44.9923	24.445	49.3899	42.7535	29.4667	39.8469	32.0096	53.1922	51.7801	27.7933	52.0242
si:ch73-6k14.2	1	complement(49245229..49250490)	ENSDARG00000096031	-1.60096	-0.678938	0.465146	1.2436	0.314519	0.93592	1.99095	0.993457	0.175722	4.5084	6.10081	16.5079	9.70927	6.72588	3.0441	3.92095	4.2554	5.54156	10.0945	11.3985	15.5985
caly	1	49266886..49295059	ENSDARG00000036008	1.07255	0.101047	0.958556	1.247	0.318457	0.93592	1.16264	0.217409	0.8822	1.5241	0.900827	2.39619	0.765866	0.886171	0.888749	1.63233	1.11562	1.56702	1.52816	1.32383	1.83392
msx1b	1	49352900..49355313	ENSDARG00000008886	-1.03879	-0.0549043	0.969314	1.08131	0.11278	0.982781	1.12325	0.167684	0.887748	8.59873	8.80774	2.95317	7.19152	4.44143	8.37321	5.28805	3.29986	6.69507	6.74425	6.73425	7.8671
si:dkeyp-80c12.8	1	complement(49357695..49362000)	ENSDARG00000094465	1.12669	0.172086	0.969314	-3.00845	-1.58902	0.93592	-3.38958	-1.76111	0.821071	0.20426	0	0	0	0	0	0.187514	0	0	0	0	0
gsk3bb	1	complement(49370549..49409549)	ENSDARG00000052468	-1.02345	-0.0334336	0.986239	1.04347	0.0613914	0.995172	1.06794	0.0948251	0.982173	0.75479	0.167296	1.22377	0.487654	0.164575	0.513499	0.519681	0.690624	0.332593	0	0.171029	2.07936
taf5	1	49415281..49432147	ENSDARG00000018325	1.46552	0.551411	0.257682	1.03023	0.0429649	0.995172	-1.42252	-0.508446	0.3207	5.50164	4.83865	4.93033	4.70141	5.25895	8.17873	5.2122	4.38154	5.8958	4.53913	4.30833	4.54902
atp5md	1	complement(49432137..49434892)	ENSDARG00000096003	1.55333	0.63536	0.248197	1.19613	0.25838	0.934405	-1.29862	-0.376981	0.625586	281.975	303.632	233.68	345.311	330.905	306.624	384.518	391.681	366.217	330.17	324.804	285.321
pdcd11	1	49435017..49481173	ENSDARG00000052480	-1.09846	-0.135479	0.852927	-1.36259	-0.446349	0.649863	-1.24046	-0.31087	0.651291	8.43422	6.74991	9.80004	6.13418	6.81906	5.36103	5.55744	4.35619	5.22659	3.98585	5.37531	6.69047
zgc:175214	1	complement(49481203..49498116)	ENSDARG00000022891	-1.09969	-0.137094	0.873223	1.35771	0.441173	0.772533	1.49305	0.578267	0.302393	33.5566	22.9476	32.2254	36.1527	22.9604	18.9082	23.8965	22.1219	43.8002	32.1115	38.9476	43.6248
CALHM1	1	complement(49501171..49505449)	ENSDARG00000005314	2.62073	1.38997	0.64909	2.02468	1.0177	0.93592	-1.29439	-0.372271	0.929596	0	0	0.138652	0.202586	0.307662	0.457121	0	0	0.207254	0.30317	0	0.178724
si:dkeyp-80c12.4	1	49510209..49512544	ENSDARG00000036479	1.23697	0.306806	0.831807	1.43685	0.522911	0.886639	1.16159	0.216105	0.891259	1.15193	0.714901	1.01873	1.14117	1.00467	0.537383	1.05749	1.22265	2.38568	0.693002	1.25288	1.18184
zp3c	1	complement(49514224..49521411)	ENSDARG00000092919	-1.91892	-0.940297	0.71618	-1.44269	-0.528761	0.941781	1.3301	0.411536	0.909112	0.148321	0.0657497	0.26234	0.319424	0.12936	0.0576606	0.0680805	0.0542848	0.326784	0.127471	0	0.0563598
si:ch211-281g13.5	1	complement(49525096..49530615)	ENSDARG00000074052	-1.91356	-0.936262	0.463912	3.17695	1.66764	0.0888407	6.0793	2.60391	0.000292637	1.53999	0.765917	1.06295	2.49143	0.327589	0.554871	0.724105	0.742339	3.57498	8.29613	0.306392	4.70992
slc47a2.2	1	complement(49532662..49544601)	ENSDARG00000074136	-5.9706	-2.57788	0.123157	4.42023	2.14412	0.319738	26.3914	4.722	9.22163e-05	0.671635	0.330812	0.131993	2.31429	0.357973	0.0290113	0.0342539	0.0273128	0.0986505	8.49799	0.101458	4.90573
si:ch211-281g13.4	1	complement(49547045..49558223)	ENSDARG00000075389	-3.06644	-1.61657	0.00629559	1.28139	0.357708	0.927792	3.9293	1.97427	0.000163781	5.28963	1.87588	1.84808	2.97028	0.341734	0.578829	1.29492	0.74571	4.28183	4.71442	1.5626	3.27552
col17a1a	1	49568335..49605854	ENSDARG00000069415	-1.49099	-0.576275	0.419344	-1.05897	-0.0826593	0.990175	1.40797	0.493616	0.547244	52.7629	21.5458	28.1536	22.6397	9.7673	20.6092	24.5405	10.1598	41.3768	20.1537	19.733	27.9507
slkb	1	complement(49606518..49649122)	ENSDARG00000012574	1.04853	0.068372	0.948351	1.20469	0.268665	0.901892	1.14893	0.200293	0.821071	2.84151	1.69663	3.16823	2.18136	2.19165	1.72836	2.37786	1.71207	2.41901	2.49191	2.57544	3.43751
tsga10	1	49651012..49674006	ENSDARG00000052512	-2.59436	-1.37538	0.842511	-3.00845	-1.58902	0.93592	-1.15961	-0.213643	0.982173	0.0482661	0	0	0	0	0	0	0	0	0	0	0
si:ch211-149l1.2	1	49682312..49698110	ENSDARG00000079501	1.1416	0.191059	0.939974	2.22237	1.1521	0.636893	1.94671	0.961037	0.535011	0.274654	0.20292	0.215906	0.27603	0.0399237	0.177955	0.546295	0.134029	0.322732	0.354068	0.829788	0.521822
lef1	1	49814461..49905357	ENSDARG00000031894	-1.1049	-0.143916	0.907664	1.19449	0.256389	0.93592	1.31979	0.400306	0.714328	1.667	1.34558	0.645436	1.43602	0.911394	1.45087	0.799425	0.528158	1.73223	1.71065	1.05989	1.19124
hadh	1	complement(49909672..49919042)	ENSDARG00000030765	1.11799	0.160908	0.858901	-1.03684	-0.0522	0.995172	-1.15918	-0.213108	0.835616	171.26	136.653	196.622	135.296	130.859	135.624	139.58	146.641	123.909	192.275	131.221	111.423
cyp2u1	1	complement(49923402..49932040)	ENSDARG00000026548	-2.82633	-1.49893	0.101131	1.17793	0.236258	0.963367	3.32923	1.73519	0.0314844	2.15765	0.55537	1.14899	1.31906	0.364222	0.270579	0.383371	0.356634	1.16544	0.657992	1.38786	2.38028
sgms2a	1	complement(49933652..49950643)	ENSDARG00000052520	1.21231	0.277756	0.856566	-1.31166	-0.391389	0.93592	-1.59013	-0.669145	0.635526	2.4615	4.01748	0.791587	2.36139	2.2932	2.78377	2.25969	2.08845	1.47906	3.89441	0.557755	0.765274
gstcd	1	49951707..50065603	ENSDARG00000036494	-1.71319	-0.776685	0.342252	-1.07117	-0.0991825	0.990041	1.59937	0.677502	0.463178	1.79305	1.86789	1.21571	1.35153	0.469149	1.01073	0.781873	0.590624	1.22465	1.3869	1.38138	1.49893
npnta	1	50085440..50188006	ENSDARG00000018721	-1.32004	-0.400587	0.593824	-1.14399	-0.19407	0.937206	1.1539	0.206517	0.841532	10.8604	2.97926	8.1545	4.78264	2.76089	3.33217	5.00733	4.06396	4.29196	4.85519	5.34105	6.40297
BX537118.1	1	complement(50159645..50167792)	ENSDARG00000114696	1.22408	0.291702	0.969314	3.08408	1.62484	0.93592	2.5195	1.33314	0.86417	0	0	0	0	0	0	0	0	0.274979	0	0	0
tbck	1	complement(50198607..50293948)	ENSDARG00000013667	1.10946	0.149858	0.877508	1.06552	0.0915632	0.986036	-1.04123	-0.0582952	0.977807	4.58979	2.01781	2.99676	4.1172	2.44814	4.42389	3.09918	1.97139	3.81092	2.771	3.57556	3.3728
aimp1a	1	50293938..50319654	ENSDARG00000060036	1.08226	0.11405	0.900406	1.12107	0.164879	0.946954	1.03586	0.0508285	0.978089	68.203	80.7125	103.45	85.9289	65.0742	80.0488	69.5068	73.383	77.7587	78.4122	92.135	108.307
dkk2	1	complement(50392716..50438247)	ENSDARG00000076420	-1.11815	-0.161114	0.935127	-1.45265	-0.538688	0.905542	-1.29916	-0.377574	0.841795	2.19012	0.543683	2.78908	0.603728	0.764053	1.29415	0.7238	1.21839	0.463228	0.828188	0.873418	1.53127
papss1	1	complement(50487586..50527964)	ENSDARG00000057099	1.00732	0.0105165	0.990206	-1.13466	-0.182261	0.961722	-1.14296	-0.192778	0.870871	3.00074	1.55191	2.83067	2.32646	1.6139	2.91638	1.79057	1.24469	2.51229	1.71928	1.81318	1.86239
pkd2	1	50538839..50557030	ENSDARG00000014098	-1.33189	-0.413475	0.633974	-1.29757	-0.375813	0.892593	1.02645	0.0376627	0.982173	5.13149	2.17997	4.83224	2.73209	1.8337	2.10572	3.17323	1.51291	1.72727	1.86819	3.03607	3.76437
abcg2d	1	complement(50566256..50590626)	ENSDARG00000016818	1.09371	0.129226	0.969314	-1.66376	-0.734443	0.938804	-1.81966	-0.863669	0.823158	0	0.149428	0.132492	0	0.048999	0.0436814	0.10315	0.0411241	0	0	0.0509206	0.0853921
ppm1k	1	complement(50594175..50611031)	ENSDARG00000010655	-1.46524	-0.55114	0.199738	-1.11234	-0.153593	0.93592	1.31727	0.397546	0.460897	9.73103	5.46854	9.17045	7.16158	4.54423	5.33192	3.6577	3.14086	7.42788	4.41204	6.59753	7.86113
si:ch73-190m4.1	1	50613868..50637221	ENSDARG00000075785	-2.22886	-1.15631	0.0601882	1.46838	0.554221	0.793086	3.27281	1.71053	0.000466784	3.13614	2.46187	2.50385	3.06743	1.33912	0.736594	1.31955	0.573907	4.46245	2.89182	1.42124	6.97634
herc3	1	50639416..50691538	ENSDARG00000075887	-1.66197	-0.732892	0.100379	-1.24698	-0.318443	0.870777	1.33279	0.414449	0.517439	7.30724	3.05374	4.97243	4.24271	2.2741	2.00227	2.83693	1.93218	4.17025	2.7942	3.38445	4.06099
fam13a	1	complement(50694971..50710468)	ENSDARG00000075564	-2.85262	-1.51229	2.83294e-07	-1.90246	-0.927863	0.0102604	1.49944	0.584422	0.200522	39.8768	34.2447	28.2321	28.6022	6.18454	8.62679	11.1048	9.70944	18.3066	19.7884	11.0394	14.582
CABZ01031870.1	1	complement(50773727..50791280)	ENSDARG00000116732	-4.39475	-2.13578	0.453249	-5.18913	-2.37549	0.614929	-1.18076	-0.239711	0.982173	0.701871	0.0777836	0	0.226732	0	0.0682139	0	0.0642204	0	0	0	0.13335
zgc:154142	1	complement(50794669..50838160)	ENSDARG00000100792	2.11857	1.08309	0.688672	1.96306	0.973107	0.913447	-1.07921	-0.109981	0.982173	1.46062	0	0.0291914	0	0.15114	0.75068	0.477258	0.724853	1.87629	0.574457	0.0224382	0.018814
si:dkeyp-123h10.2	1	complement(50847783..50859054)	ENSDARG00000075043	-1.25452	-0.327131	0.834992	1.0528	0.074227	0.995172	1.32075	0.401358	0.812979	0.970775	0.609645	1.097	0.731729	0.493892	0.283045	0.259929	0.947464	1.10506	0.938599	0.586583	0.67628
otx2a	1	50921266..50929957	ENSDARG00000030703	-2.5944	-1.3754	0.842511	-3.0085	-1.58904	0.93592	-1.15961	-0.213643	0.982173	0	0	0	0.0628651	0	0	0	0	0	0	0	0
mdh1aa	1	50968908..50990889	ENSDARG00000017772	1.24321	0.314065	0.647995	1.05139	0.0723042	0.98775	-1.18244	-0.241761	0.770039	309.464	243.781	274.592	320.601	221.965	293.692	312.83	283.9	316.603	286.337	259.657	259.194
ugp2a	1	50997156..51015627	ENSDARG00000005578	1.09493	0.130842	0.939239	-1.19882	-0.261618	0.952227	-1.31263	-0.39246	0.790255	26.7593	5.91661	21.8327	19.2753	16.7192	6.46043	31.5927	7.56684	17.0671	2.58654	25.6769	10.8891
spast	1	complement(51021279..51038885)	ENSDARG00000024933	-1.03199	-0.04543	0.969314	-1.03931	-0.0556303	0.992061	-1.0071	-0.0102003	0.989204	9.11426	7.03228	5.86733	7.42697	5.37101	7.00981	6.42225	3.82262	8.16252	5.92771	4.91185	7.63794
dpy30	1	51039558..51042328	ENSDARG00000004427	1.36383	0.447663	0.246163	1.29498	0.372935	0.620821	-1.05316	-0.0747281	0.92637	41.5135	39.1474	31.1504	38.8497	38.0167	44.0142	40.8816	38.8131	49.0575	43.9486	42.2441	48.6141
psen2	1	complement(51048975..51062405)	ENSDARG00000015540	-1.0657	-0.0918052	0.923445	1.37441	0.458817	0.713226	1.46472	0.550622	0.326118	8.91596	5.78537	6.47556	4.9534	3.77538	6.88201	4.6856	3.73612	10.8753	6.71868	5.21173	10.8021
srd5a2a	1	51066671..51073128	ENSDARG00000043587	1.10067	0.138378	0.899711	-2.95353	-1.56244	0.000487771	-3.25085	-1.70082	7.31543e-05	52.6981	59.4055	22.938	22.8754	35.0993	56.4182	24.2833	23.431	23.0396	8.75728	8.95568	10.9509
jag1a	1	complement(51104984..51157660)	ENSDARG00000030289	-1.30563	-0.384749	0.678796	-1.70507	-0.769834	0.435148	-1.30594	-0.385085	0.706831	1.0503	1.10479	1.91017	1.24214	0.652088	0.913503	0.866135	0.742746	0.611846	0.443678	0.968087	0.879367
btbd3a	1	51191049..51197601	ENSDARG00000005544	-2.08596	-1.06071	0.412489	-1.31738	-0.39767	0.93592	1.58341	0.663038	0.699096	2.03919	0.390901	2.33953	1.32935	0.288406	0.428511	1.31546	0.242055	0.339994	0.521025	1.29877	2.01045
esf1	1	complement(51202984..51219965)	ENSDARG00000008740	1.09631	0.132662	0.842511	-1.47629	-0.561974	0.26659	-1.61848	-0.694636	0.0434057	10.8244	11.2731	14.9931	11.0755	9.85288	14.0023	10.7614	7.33517	7.62319	6.94663	6.55485	9.44759
ndufaf5	1	51221320..51229456	ENSDARG00000061629	1.20513	0.269191	0.730154	1.06937	0.0967582	0.981318	-1.12696	-0.172433	0.86417	38.8118	34.67	37.9262	58.1936	32.9975	34.2811	37.1555	52.8838	40.8384	53.2687	40.1397	32.9134
kif16ba	1	complement(51229327..51266394)	ENSDARG00000100225	1.08714	0.120542	0.899527	1.05222	0.0734413	0.990175	-1.03319	-0.0471009	0.982128	1.95227	0.989061	2.1787	1.63671	1.27702	1.74831	1.39217	1.2249	1.81268	1.61791	1.48509	1.60289
mast1a	1	51312752..51377850	ENSDARG00000027497	-1.21068	-0.275823	0.937245	-1.16762	-0.223568	0.991293	1.03688	0.0522544	0.985832	0.105259	0	0.0496465	0.0725392	0	0	0.0773033	0.0616388	0.0556579	0	0.0572417	0.0639949
atg4da	1	51386649..51406531	ENSDARG00000043548	-1.12062	-0.164294	0.842511	-1.08464	-0.117219	0.97233	1.03317	0.0470748	0.981859	4.55565	2.39179	3.12104	2.08279	1.88674	2.45372	2.35976	1.65803	3.47653	2.07792	1.54552	3.28808
actr2a	1	51407520..51428106	ENSDARG00000052438	-1.0661	-0.0923433	0.923537	-1.11223	-0.153458	0.958909	-1.04327	-0.0611151	0.972736	33.1658	32.0293	23.9985	27.6915	22.1122	27.876	19.9856	16.8828	33.0658	20.9768	19.5065	26.1883
spred2a	1	complement(51444549..51474974)	ENSDARG00000052435	1.54329	0.626005	0.126961	1.03578	0.0507111	0.99406	-1.48998	-0.575294	0.170817	3.83937	2.43584	3.98725	2.21503	3.93223	4.55987	3.76711	2.68146	3.44566	2.49745	2.96906	2.98472
meis1a	1	51475094..51525086	ENSDARG00000002937	-1.05756	-0.0807445	0.920086	1.02758	0.0392532	0.995172	1.08673	0.119998	0.881759	7.63361	8.91375	10.538	9.38266	5.60224	7.419	6.79411	7.18909	10.1321	9.04073	7.50946	8.56047
etaa1	1	51537250..51545917	ENSDARG00000074915	-1.9487	-0.962511	0.39865	1.23505	0.304565	0.939647	2.40673	1.26708	0.179645	1.32143	0.781038	0.923356	0.421603	0.469535	0.190263	0.314504	0.358249	1.85466	0.925361	0.44359	0.743885
ppp3r1b	1	complement(51557789..51591436)	ENSDARG00000069360	1.37585	0.46032	0.414592	1.45163	0.537673	0.498755	1.05508	0.0773526	0.947842	27.9016	24.36	34.5051	24.9881	32.4215	30.6556	30.0653	26.8372	38.0084	35.5304	32.6906	44.9946
cnrip1a	1	complement(51593884..51606552)	ENSDARG00000091683	1.15767	0.211225	0.877062	-1.01462	-0.0209343	0.995172	-1.17459	-0.232159	0.874334	2.00923	1.48446	1.08588	1.226	1.31428	1.43201	1.46023	1.10305	1.03291	1.72679	1.59346	1.08159
FBXO48	1	complement(51608742..51615475)	ENSDARG00000086184	1.07101	0.0989732	0.911478	1.43404	0.520084	0.582971	1.33896	0.421111	0.522505	13.2088	17.2704	16.8338	15.8611	15.4767	10.3737	14.0856	13.2823	20.9298	15.5947	22.9766	26.4646
zgc:165656	1	51615506..51627129	ENSDARG00000096566	-1.4963	-0.581398	0.825647	-1.02985	-0.0424398	0.995172	1.45292	0.538958	0.862171	1.61641	0.390841	0.519816	0.25317	0.128161	0.114252	1.07919	0.107563	1.29502	0	0.532747	0.670048
prokr1a	1	complement(51673028..51684941)	ENSDARG00000074182	1.92958	0.948286	0.688672	1.37425	0.458639	0.962508	-1.4041	-0.489647	0.86417	0.362659	0	0.0855259	0	0.126519	0.169182	0.26634	0.106185	0.191764	0.124671	0.13148	0.110244
snrpb2	1	complement(51702087..51710340)	ENSDARG00000039424	1.38557	0.470482	0.411226	1.17716	0.235313	0.935711	-1.17704	-0.235169	0.775471	12.2077	11.5103	8.33978	10.5996	12.6751	13.1827	13.8751	7.5175	16.5646	9.32587	11.5037	10.3083
rnaseh2a	1	complement(51712869..51720633)	ENSDARG00000018891	-1.36644	-0.450418	0.631792	1.08438	0.116875	0.982781	1.48174	0.567293	0.523393	12.0062	8.14466	5.14804	7.44353	4.44238	8.27414	4.34194	2.06395	10.661	10.553	5.52343	5.87552
prdx2	1	51721851..51729862	ENSDARG00000025350	1.1503	0.202013	0.797268	1.11059	0.151321	0.952013	-1.03576	-0.0506917	0.976624	148.775	169.587	158.491	149.889	139.431	149.177	142.152	136.853	162.193	163.289	160.987	165.248
junba	1	complement(51732979..51734535)	ENSDARG00000074378	-2.08383	-1.05924	0.0695049	-1.14257	-0.192287	0.959124	1.8238	0.86695	0.1745	13.896	21.9323	10.9837	16.7061	2.79682	10.3887	7.64001	4.19165	26.2422	9.38347	6.50502	13.1136
dand5	1	51827046..51829291	ENSDARG00000036471	#N/A	#N/A	#N/A	#N/A	#N/A	#N/A	#N/A	#N/A	#N/A	0	0	0	0	0	0	0	0	0	0	0	0
nfixa	1	51896147..52086496	ENSDARG00000043226	-2.47844	-1.30943	0.210324	-1.69329	-0.759831	0.822432	1.46368	0.549603	0.764382	1.64393	0.458066	1.0523	0.566457	0.122894	0.328672	0.215593	0.412573	0.248361	0.403668	0.468285	0.820992
rad23aa	1	complement(52111273..52128425)	ENSDARG00000020001	-1.43483	-0.520883	0.504743	-1.27872	-0.354705	0.901892	1.12208	0.166178	0.885042	13.1526	4.48497	10.3393	6.24612	2.79427	6.68642	4.64396	4.0115	8.2476	4.85481	5.42561	5.89484
BX901942.2	1	complement(52121918..52167509)	ENSDARG00000113791	#N/A	#N/A	#N/A	#N/A	#N/A	#N/A	#N/A	#N/A	#N/A	0	0	0	0	0	0	0	0	0	0	0	0
rnf11a	1	52130164..52137313	ENSDARG00000010442	-1.56349	-0.644771	0.129251	1.18761	0.248067	0.901892	1.85682	0.892838	0.0103215	24.1673	21.8414	16.7068	24.7405	12.0975	8.70045	10.1165	12.3645	26.023	20.8798	22.3672	28.5844
get3	1	52137528..52152993	ENSDARG00000018190	1.07549	0.105	0.878131	1.10821	0.148232	0.93592	1.03042	0.0432316	0.976355	19.8949	13.503	16.47	13.675	12.8788	17.3519	13.5559	9.73371	20.3265	14.9941	14.2714	15.805
best2	1	52162642..52170135	ENSDARG00000079163	3.57803	1.83916	0.797268	1.0556	0.0780585	0.995172	-3.38958	-1.76111	0.821071	0	0	0	0	0	0	0	0.0605136	0	0	0	0
rab3da	1	complement(52178916..52201279)	ENSDARG00000018107	-1.49621	-0.58131	0.531084	-1.64612	-0.719066	0.620821	-1.10019	-0.137756	0.935325	5.54771	3.4254	3.73805	2.90154	2.33284	2.00265	1.72794	1.95792	1.83342	1.53252	1.97538	3.31264
pld6	1	complement(52203009..52210950)	ENSDARG00000059951	3.3503	1.74429	0.648498	2.24855	1.16899	0.93592	-1.48998	-0.575298	0.882542	0	0	0	0.0598523	0.0605973	0.054021	0.0637832	0.0508583	0.183694	0	0	0
cnn1a	1	complement(52214895..52222989)	ENSDARG00000017193	#N/A	#N/A	#N/A	#N/A	#N/A	#N/A	#N/A	#N/A	#N/A	0	0	0	0	0	0	0	0	0	0	0	0
si:dkey-121b10.7	1	complement(52264131..52292235)	ENSDARG00000059948	1.10645	0.145945	0.969314	-1.22836	-0.296733	0.98775	-1.35912	-0.442677	0.913372	0.343252	0	0.134915	0.29569	0	0.177921	0	0.418761	0	0.0983333	0.103704	0.347814
si:ch211-217k17.8	1	52392511..52396264	ENSDARG00000095434	-1.85939	-0.89483	0.579025	-3.49211	-1.8041	0.196482	-1.87809	-0.90927	0.61939	7.41838	1.15098	6.56054	4.15381	0.16175	3.02812	3.06458	1.62905	3.4323	0.637556	0	1.12755
si:ch211-217k17.9	1	52398205..52400660	ENSDARG00000093494	-1.04262	-0.0602121	0.969314	-1.68652	-0.754048	0.520983	-1.61758	-0.693836	0.385193	37.2699	40.3944	36.3307	33.2335	9.59172	57.616	26.2015	20.8921	44.6144	13.5024	11.9456	15.4555
zgc:194101	1	complement(52429810..52431220)	ENSDARG00000076828	-2.24958	-1.16966	0.0222472	1.07039	0.0981307	0.985646	2.40792	1.26779	0.00739173	26.7747	71.8923	37.164	60.1	29.7569	13.6801	16.0118	11.6473	66.8782	27.7445	41.6016	73.4851
si:ch211-217k17.12	1	complement(52433847..52437056)	ENSDARG00000088234	-1.55418	-0.636155	0.339807	1.48326	0.568773	0.674795	2.30526	1.20493	0.00905611	49.2043	82.4369	53.6569	116.324	51.4108	35.4762	45.9627	24.914	157.476	49.3884	90.1999	147.794
si:ch211-217k17.11	1	complement(52441080..52443379)	ENSDARG00000093748	-1.73343	-0.793625	0.0924139	1.26911	0.34382	0.869916	2.19991	1.13745	0.00288654	68.5843	81.2936	49.6885	76.1135	38.4766	27.9596	36.6424	23.6995	114.459	44.3933	55.6661	128.568
si:ch211-217k17.10	1	complement(52446149..52447364)	ENSDARG00000079345	-1.3925	-0.477675	0.604028	1.47963	0.565232	0.787556	2.06038	1.04291	0.0824356	186.256	349.256	229.047	669.807	324.115	227.062	147.752	138.694	757.823	335.028	363.184	650.887
si:ch211-217k17.7	1	complement(52452010..52461322)	ENSDARG00000059908	1.03963	0.0560671	0.954232	-1.26187	-0.335563	0.820319	-1.31187	-0.39163	0.475927	32.8586	39.7412	35.1599	40.0504	32.8497	37.2923	29.4443	23.1906	30.7731	18.714	28.5372	33.842
glb1	1	52462068..52478746	ENSDARG00000036415	-1.73127	-0.791833	0.164596	1.07613	0.105846	0.981318	1.86307	0.897679	0.0824356	6.35117	6.44823	3.50291	5.91235	3.03764	1.95134	3.52649	1.76212	5.91316	5.01818	5.29223	6.38369
cldnd1b	1	52481332..52486995	ENSDARG00000052386	-1.13709	-0.18535	0.860521	1.1762	0.234135	0.93592	1.33745	0.419485	0.674881	5.02774	2.11145	5.46043	3.59024	1.84631	3.18901	3.46165	2.42122	3.26485	4.20726	4.7968	4.92698
acy3.2	1	complement(52489962..52498146)	ENSDARG00000005525	-1.07714	-0.10721	0.906994	1.05511	0.0773972	0.986813	1.13651	0.184607	0.847235	6.68282	7.06571	6.31384	4.7914	4.59763	6.29324	3.58188	3.73718	5.59683	7.95514	5.49274	5.07874
acy3.1	1	complement(52499412..52505279)	ENSDARG00000093003	-1.04811	-0.0677899	0.954232	1.03579	0.0507329	0.995172	1.08562	0.118523	0.909852	8.17942	8.23742	9.17658	6.77243	6.7182	7.34747	5.24888	4.76655	9.58788	7.30261	6.04598	8.32838
tacr3l	1	52518176..52538517	ENSDARG00000003054	-1.32042	-0.401	0.868725	1.31376	0.393698	0.961394	1.73471	0.794698	0.730328	0.0920357	0.244793	0.0361747	0.0792831	0.0802699	0.0715586	0.112653	0.0224564	0.135183	0.210928	0.194642	0.0466296
abca1a	1	52560549..52628407	ENSDARG00000074635	-1.55538	-0.637265	0.115115	1.48815	0.57352	0.290677	2.31463	1.21078	3.383e-05	5.00168	4.0512	6.98992	4.91504	2.64967	2.91904	3.06108	1.97071	8.19545	5.73144	7.98092	7.17991
slc44a1a	1	52632856..52652163	ENSDARG00000015946	-2.31939	-1.21374	0.00442334	-1.32026	-0.40082	0.836332	1.75677	0.812925	0.111495	7.55956	3.75323	5.603	6.2144	1.73306	1.94801	2.89488	1.26481	4.49218	3.22988	3.87611	4.62886
aptx	1	complement(52653626..52659711)	ENSDARG00000027143	-1.24209	-0.312773	0.780646	1.27421	0.349603	0.916063	1.58269	0.662375	0.43337	3.24616	2.48908	2.58629	4.0056	1.37732	1.63713	2.17461	2.50459	3.17007	2.56363	4.45306	4.60058
osbp	1	52662203..52699063	ENSDARG00000004634	-1.74354	-0.802021	0.225085	-1.65908	-0.730382	0.490951	1.05091	0.0716381	0.97508	7.82533	2.86653	7.23815	3.6329	2.37034	1.8945	3.74244	1.50919	2.8081	1.65112	3.31271	4.09525
CABZ01021532.1	1	52735484..52736125	ENSDARG00000115887	-3.25547	-1.70286	0.603102	2.22229	1.15205	0.933454	7.23459	2.85491	0.251187	0	4.16517	0	11.7892	0.178148	0	0	3.28936	0	28.0875	2.96215	0
wu:fc75a09	1	52754085..52763447	ENSDARG00000111625	-1.27596	-0.351589	0.730154	-1.63657	-0.710673	0.58583	-1.28261	-0.359084	0.756499	3.60777	3.13973	4.93268	5.81535	2.56744	2.44369	3.45422	2.34923	1.73604	1.17938	1.24379	6.24054
patl1	1	complement(52763979..52790782)	ENSDARG00000017423	-1.03796	-0.0537563	0.950351	-1.02223	-0.0317181	0.995172	1.01539	0.0220383	0.982173	21	17.571	15.7859	17.7227	13.7651	16.2001	12.4405	12.0092	19.548	15.228	14.2752	17.1064
smarca5	1	52792439..52820954	ENSDARG00000052348	1.4091	0.494776	0.355937	1.01195	0.0171401	0.995172	-1.39246	-0.477636	0.397503	12.109	8.54876	9.63221	8.58223	9.66693	15.1185	10.2634	7.99605	15.1603	7.65367	7.4329	6.76795
inpp4b	1	52929185..53225121	ENSDARG00000075201	-1.72486	-0.786482	0.275174	-1.25052	-0.322529	0.933454	1.37932	0.463954	0.655905	1.89811	1.42675	1.84891	1.35074	0.719764	0.577486	0.871246	0.755108	1.2364	1.17027	1.04719	1.34843
BX957281.1	1	53221858..53271128	ENSDARG00000113238	#N/A	#N/A	#N/A	#N/A	#N/A	#N/A	#N/A	#N/A	#N/A	0	0	0	0	0	0	0	0	0	0	0	0
il15	1	complement(53234693..53260082)	ENSDARG00000052361	-1.00707	-0.0101601	0.986833	1.21427	0.280086	0.901892	1.22285	0.290247	0.695106	13.6711	11.2172	16.1203	9.4361	12.4418	9.24299	11.2251	6.40208	17.5859	9.48706	14.8538	15.4231
znf330	1	complement(53266504..53277660)	ENSDARG00000020494	1.12732	0.172894	0.797268	-1.01654	-0.0236611	0.995172	-1.14596	-0.196555	0.793161	13.798	9.295	15.0621	13.4432	11.1407	11.4776	11.7817	10.6733	14.5495	10.6673	11.6868	10.3029
rnf150a	1	53279861..53299024	ENSDARG00000024827	-1.99328	-0.995148	0.64468	-1.05831	-0.0817627	0.995172	1.88346	0.913385	0.701519	0.591113	0	1.70381	1.07499	0	0.0510662	0.361767	0.769225	0.636704	0.225786	1.48823	0.549057
tbc1d9_1	1	53321878..53361108	ENSDARG00000059900	-1.61705	-0.693366	0.646393	-1.04187	-0.0591707	0.995172	1.55207	0.634195	0.704507	0.613082	0.1553	0.654067	0.377237	0.152773	0.0453978	0.241208	0.36329	0.411657	0.175633	0.37045	0.621231
ucp1	1	53374454..53388914	ENSDARG00000023151	1.40642	0.492031	0.791731	-1.07249	-0.100959	0.995172	-1.50837	-0.59299	0.762574	0.0944988	0.251344	0.501428	0.244214	0.41209	0.220421	0.303629	0.242103	0.249841	0.121822	0.128475	0.394989
elmod2	1	complement(53391345..53407463)	ENSDARG00000101669	1.04863	0.0685069	0.940174	1.20817	0.272828	0.884496	1.15214	0.204321	0.791665	3.23965	2.50444	2.51564	2.38236	2.20527	2.22704	2.28494	1.99544	3.1336	2.19005	3.47343	3.22767
zgc:66455	1	complement(53454741..53468160)	ENSDARG00000052375	1.55184	0.633983	0.842511	1.08004	0.111078	0.995172	-1.43684	-0.522904	0.874396	0.0548843	0.0973193	0.194151	0	0.0957359	0.170692	0	0.120524	0.145106	0	0.198981	0
b3gnt2a	1	complement(53475074..53476758)	ENSDARG00000052376	-1.81915	-0.863267	0.446363	-2.05577	-1.03968	0.511539	-1.13007	-0.176412	0.936202	3.17482	1.0008	1.49744	1.21552	0.738388	0.658254	0.647674	0.774646	0.80829	0.121268	1.15102	0.965108
commd1	1	complement(53490669..53504603)	ENSDARG00000031203	-1.19231	-0.253756	0.752349	1.0663	0.0926154	0.982781	1.27136	0.346372	0.665522	8.62636	7.79368	9.49367	10.9697	5.37398	8.43175	4.82689	5.6529	10.4984	10.7323	8.56325	6.80552
si:ch211-213b8.4	1	53515089..53535565	ENSDARG00000095360	#N/A	#N/A	#N/A	#N/A	#N/A	#N/A	#N/A	#N/A	#N/A	0	0	0	0	0	0	0	0	0	0	0	0
USP34	1	complement(53568296..53625142)	ENSDARG00000102252	-1.30386	-0.382784	0.518015	-1.27047	-0.345367	0.833393	1.02627	0.0374164	0.982173	2.64082	1.36472	2.33129	1.67881	1.05924	1.43838	1.25753	0.971697	1.65526	1.17728	1.31837	1.64205
xpo1a	1	complement(53657337..53685090)	ENSDARG00000078041	1.13139	0.178096	0.784155	1.20923	0.274087	0.867612	1.0688	0.0959904	0.903841	9.32141	5.72353	8.35492	6.21226	5.46562	7.12506	8.73064	4.84077	11.4342	6.03537	7.16417	8.83105
fam161a	1	complement(53686995..53700392)	ENSDARG00000089742	-1.09041	-0.124875	0.969314	-1.05303	-0.0745482	0.995172	1.0355	0.0503272	0.988421	0.0856789	0.0379808	0.151543	0	0	0.0333081	0.117982	0.0313581	0.0377538	0.0368174	0.155312	0
cct4	1	complement(53701801..53714885)	ENSDARG00000013475	-1.0751	-0.104472	0.906664	-1.13479	-0.182425	0.93592	-1.05552	-0.0779526	0.949966	198.505	169.549	188.807	158.373	134.613	156.271	119.681	110.978	139.853	124.694	145.184	178.377
pus10	1	53714734..53730536	ENSDARG00000079973	1.67251	0.742012	0.267781	1.14735	0.1983	0.953736	-1.45772	-0.543712	0.51067	2.50153	1.86498	2.48041	2.93852	2.97509	4.28776	3.28808	2.3721	3.70767	2.49191	2.57647	1.81467
akt3b	1	complement(53735195..53756851)	ENSDARG00000087205	1.06389	0.0893445	0.969314	1.15563	0.208675	0.977904	1.08623	0.119331	0.973279	0.365622	0.324155	1.1086	0.40495	0.318881	0.324885	0.719242	0.420564	0.322218	0.493783	0.710114	0.754196
ifngr1	1	53842344..53863308	ENSDARG00000074771	-1.87235	-0.904853	0.175408	-1.06316	-0.088365	0.990599	1.76111	0.816488	0.243464	6.87573	2.16491	3.48548	2.71241	1.23297	1.94852	1.88771	1.12889	4.13404	2.15382	3.02859	3.7603
ltv1	1	complement(53865677..53880639)	ENSDARG00000008490	1.14749	0.198487	0.731855	-1.01743	-0.0249313	0.995172	-1.1675	-0.223418	0.714222	14.4621	13.2179	15.8678	15.2962	11.6393	16.9317	13.584	10.9948	14.7136	13.2929	13.2091	12.8155
capn9	1	complement(53881844..53907092)	ENSDARG00000012341	-1.43613	-0.522189	0.503477	-1.74418	-0.80255	0.32692	-1.2145	-0.280361	0.799054	54.2265	65.8927	42.5575	45.2542	37.3457	37.4154	23.52	17.9712	50.4593	14.6283	16.2349	36.4359
taf5l	1	complement(53911834..53918839)	ENSDARG00000025808	1.37812	0.462706	0.664005	1.23497	0.304472	0.93592	-1.11592	-0.158234	0.917966	1.53797	0.909028	1.14183	1.47207	1.29168	1.24008	1.72563	1.25087	1.30519	0.832228	1.75536	1.94802
nup133	1	53919110..53941906	ENSDARG00000010078	1.41162	0.497354	0.267373	-1.0218	-0.0311111	0.995172	-1.44239	-0.528465	0.219853	6.98527	5.61694	6.16794	5.23371	6.37563	9.4476	5.69675	5.06558	5.92696	5.38904	4.74103	5.77772
acta1a	1	53945934..53953532	ENSDARG00000036371	-3.33294	-1.7368	0.00785044	-2.3852	-1.25411	0.164721	1.39734	0.482687	0.714699	64.1595	63.4211	43.7401	18.6137	6.75348	2.06419	13.8109	19.4874	9.48881	21.6759	17.7798	23.539
ccsapa	1	53954230..53963933	ENSDARG00000025325	-4.40743	-2.13994	0.159534	1.03597	0.0509811	0.995172	4.56596	2.19092	0.132572	0.273706	0.0808878	0.591691	0.628748	0.0397859	0.0709362	0.125633	0.0333916	0.0804043	0.117615	0.454807	0.8667
RHOU	1	complement(53980120..53988017)	ENSDARG00000005626	1.31779	0.398124	0.91307	1.76408	0.818914	0.93592	1.33866	0.420791	0.916192	0.305996	0.0678229	0.0902039	0	0.0667194	0	0.421363	0	0.134835	0.197236	0	0.406959
dla	1	54013457..54026352	ENSDARG00000010791	1.59921	0.677361	0.797268	1.74839	0.806029	0.920559	1.09328	0.128668	0.982173	0.123191	0.0436878	0	0.0424486	0.0214885	0	0.158328	0.0901747	0.151993	0.0635243	0.0669936	0.0748972
triobpa	1	54037077..54062112	ENSDARG00000075870	-1.63103	-0.705779	0.468038	-1.16173	-0.21627	0.961722	1.40397	0.489509	0.694735	3.38062	2.10114	1.64382	1.8614	0.33436	1.73425	1.37576	0.86738	3.4093	1.7073	0.916064	1.24486
smdt1b	1	complement(54062510..54063520)	ENSDARG00000098852	1.25512	0.327828	0.653135	1.24948	0.321329	0.884496	-1.00452	-0.00649918	0.993748	69.9291	119.174	57.949	68.2715	103.343	86.9928	58.1329	68.5343	99.2888	65.9419	84.5083	132.86
dcaf15	1	54069450..54084665	ENSDARG00000077790	-1.35748	-0.440929	0.568735	1.00524	0.00753972	0.995172	1.36459	0.448469	0.57865	5.12854	4.04673	3.26555	3.53433	1.96808	3.07036	2.11863	2.02718	4.92648	3.87869	2.27768	3.97548
rfx1b	1	complement(54088563..54107321)	ENSDARG00000075904	-1.47129	-0.557081	0.28708	-1.38744	-0.472429	0.656796	1.06043	0.084652	0.941736	6.52366	7.13542	4.34787	6.1084	3.15406	3.69389	3.93829	2.33572	5.71796	3.13848	3.43843	4.33806
rln3b	1	54115839..54118052	ENSDARG00000116898	-4.37204	-2.12831	0.732561	-1.73518	-0.795088	0.961506	2.51964	1.33322	0.864336	0	0.235787	0	0	0	0	0	0	0	0.114282	0	0
LO017722.1	1	54124209..54126428	ENSDARG00000113296	1.02744	0.0390531	0.98282	-1.46093	-0.546891	0.93592	-1.50102	-0.585944	0.821071	2.23698	0.849974	3.01456	0.550577	1.11486	0.745402	2.64031	0.701763	0.281631	0.549292	0.868936	2.18576
TNPO2	1	54137089..54146461	ENSDARG00000042887	1.0448	0.0632252	0.969314	-1.23618	-0.305894	0.913379	-1.29156	-0.36912	0.689733	9.42286	3.28199	8.03562	5.58058	5.7968	4.7098	6.64221	3.94139	6.07989	4.26605	3.96525	5.11506
CABZ01067151.1	1	complement(54154230..54158902)	ENSDARG00000113474	1.28822	0.365374	0.783007	-1.90528	-0.930001	0.577293	-2.45441	-1.29537	0.101706	2.61123	1.94954	2.43081	2.13102	2.87672	2.45767	1.76631	2.01199	1.33229	1.29925	1.49477	0.417779
nthl1	1	complement(54178703..54191626)	ENSDARG00000042881	-1.05687	-0.0798001	0.966576	1.30124	0.379888	0.901892	1.37524	0.459688	0.665229	1.70208	2.26356	1.94429	1.23713	1.25253	2.31592	1.02541	0.77869	2.25003	1.91994	2.45868	2.10198
CABZ01067150.2	1	54194801..54199090	ENSDARG00000116122	-1.22037	-0.287319	0.900406	-1.24764	-0.319206	0.969484	-1.02235	-0.0318867	0.988432	2.43107	0.646606	1.14664	0.628266	0.424057	1.51215	0.669528	0.355904	0.428494	1.2536	0.661031	1.10853
tsc2	1	54198893..54274861	ENSDARG00000103125	-1.00117	-0.00168448	0.997207	-1.05949	-0.0833747	0.978424	-1.05826	-0.0816903	0.928407	7.36759	6.2424	8.7517	6.50304	5.2387	6.94176	5.36419	4.94137	7.54846	5.38056	6.26652	6.23353
pkd1a	1	complement(54282042..54425791)	ENSDARG00000030417	-1.73159	-0.792095	0.393581	1.11526	0.157378	0.977455	1.93117	0.949473	0.250131	0.355517	0.193967	0.462204	0.141349	0.0954055	0.127577	0.184106	0.10009	0.313312	0.219363	0.239605	0.394882
CABZ01043826.1	1	complement(54411669..54420133)	ENSDARG00000111601	#N/A	#N/A	#N/A	#N/A	#N/A	#N/A	#N/A	#N/A	#N/A	0	0	0	0	0	0	0	0	0	0	0	0
si:ch211-202h22.10	1	54606354..54608032	ENSDARG00000087290	-2.01413	-1.01016	0.558911	-1.19158	-0.252879	0.97732	1.6903	0.757277	0.719197	0.56643	0.313868	0.50093	0.60993	0.185257	0.275253	0.259995	0.0518276	0.686382	0.486805	0	0.376661
tekt4	1	complement(54613757..54622227)	ENSDARG00000028899	1.44745	0.533518	0.906994	1.50327	0.588106	0.970161	1.03856	0.0545883	0.988943	0	0	0	0.137953	0	0.0415042	0.147013	0	0.188176	0	0.0483826	0
si:ch211-202h22.9	1	54626491..54637378	ENSDARG00000079980	-1.3063	-0.385483	0.88536	1.57662	0.656838	0.93592	2.05954	1.04232	0.63773	0.517617	1.22377	0	0.297264	0.150482	0.402452	0.316787	0.378891	0.304113	1.18628	0.625533	1.049
si:ch211-202h22.8	1	54638126..54648766	ENSDARG00000078138	-1.34589	-0.42856	0.767716	-1.25878	-0.332027	0.93592	1.0692	0.0965335	0.977071	0.899554	0.920228	0.815931	1.31139	0.724205	0.64561	0.317616	0.607813	1.09767	0.475755	0.689888	0.736221
si:ch211-202h22.7	1	54650048..54659923	ENSDARG00000073912	-1.16493	-0.220246	0.902277	1.72033	0.782686	0.811425	2.00407	1.00293	0.39203	6.86992	2.25094	3.16983	3.73092	2.47482	1.39342	3.56465	2.84232	9.73963	6.67431	0.270724	8.96638
gprc5bb	1	54673846..54680103	ENSDARG00000075141	-6.14945	-2.62046	0.646692	1.21816	0.284699	0.990175	7.49099	2.90516	0.613472	0.058968	0	0.0695322	0.0507973	0	0	0	0	0	0	0.106893	0.0896278
knop1	1	54683655..54694012	ENSDARG00000077721	1.4881	0.573471	0.192803	-1.12305	-0.167417	0.93592	-1.6712	-0.740888	0.0464458	16.5949	20.3303	19.7102	20.7934	24.5258	30.1218	18.392	18.7289	16.6457	13.536	18.8149	16.0511
exosc1	1	complement(54700657..54706039)	ENSDARG00000059841	-2.51831	-1.33246	0.000852787	-1.94357	-0.958712	0.049109	1.29571	0.373745	0.66122	27.7774	19.6327	29.089	21.9205	7.62367	8.00455	5.7063	8.38905	14.2086	8.84791	9.8593	13.7289
pgam1b	1	complement(54707667..54718863)	ENSDARG00000014068	-1.03454	-0.0489926	0.969314	-1.29964	-0.378111	0.796922	-1.25625	-0.329119	0.622355	30.8677	28.173	32.163	33.1306	17.8024	32.9425	24.6645	19.8662	22.9165	27.7788	15.9047	22.1112
cdc25d	1	complement(54721240..54735441)	ENSDARG00000075599	-4.37219	-2.12836	0.730154	1.33437	0.416154	0.981318	5.83411	2.54451	0.684895	0	0.068977	0.0917388	0	0	0	0	0	0	0.0668641	0.0705157	0.0591262
pi4k2a	1	54737353..54755556	ENSDARG00000033666	1.08002	0.111059	0.899685	1.12021	0.163764	0.942188	1.03721	0.0527051	0.975301	5.50541	3.06097	3.59428	4.98371	4.91011	3.11969	2.99816	3.2558	6.63359	3.60877	3.35479	4.4676
si:ch211-197k17.3	1	complement(54758575..54765262)	ENSDARG00000096214	-1.29941	-0.377856	0.758288	-1.20591	-0.270127	0.938134	1.07753	0.107729	0.963348	4.58132	2.18709	3.87841	4.95846	1.53679	2.83135	2.58813	2.32164	1.86344	1.81722	4.57823	3.66021
nlrc6	1	54766943..54785183	ENSDARG00000091320	-2.0019	-1.00137	0.0810382	-1.27665	-0.352367	0.901892	1.56808	0.649	0.384873	6.1216	5.84913	4.82466	8.71609	1.57681	5.05553	1.25206	2.2753	7.37952	4.06165	2.61608	5.20664
si:ch211-196h16.4	1	54834119..54861588	ENSDARG00000094782	-1.58193	-0.661684	0.343163	-1.38825	-0.473262	0.827586	1.13952	0.188422	0.868174	5.98889	2.32298	3.70745	2.64402	1.24053	2.96847	1.64937	1.26035	2.86987	1.54411	2.30695	2.95839
si:ch211-196h16.5	1	54865552..54889501	ENSDARG00000069264	-1.93981	-0.955913	0.0631438	-1.18368	-0.24328	0.93592	1.63879	0.712633	0.229884	10.2238	6.0839	5.40528	10.0995	2.01112	4.81698	2.62695	3.27413	9.94048	4.94247	2.3418	8.50875
zfyve27	1	54889733..54907823	ENSDARG00000059835	1.02233	0.0318551	0.969314	-1.01502	-0.0215021	0.995172	-1.03768	-0.0533572	0.964598	13.6725	10.8624	13.9758	11.5103	10.5308	10.4234	9.6989	9.09829	12.6753	7.66834	12.5129	13.2245
golga7ba	1	54908895..54931913	ENSDARG00000036295	1.45944	0.545414	0.526891	1.3331	0.414782	0.884496	-1.09477	-0.130632	0.928497	0.973907	1.55978	2.29677	1.16372	1.61661	2.68692	1.26899	1.35679	2.24263	1.62	2.05017	1.59966
crtac1a	1	complement(54934522..54947592)	ENSDARG00000059826	1.97304	0.980421	0.0152666	2.65537	1.40891	2.25248e-05	1.34583	0.428491	0.492498	3.80282	3.12721	5.9788	6.1245	8.0273	6.21341	8.55052	6.61616	11.8512	9.99421	13.0377	12.314
r3hcc1l	1	54948059..54958463	ENSDARG00000089243	1.04138	0.0584949	0.942619	1.02682	0.0381846	0.995172	-1.01418	-0.0203103	0.982173	19.5342	15.4631	16.3704	16.0462	13.0819	12.5301	15.1147	13.8392	16.7848	13.5505	13.4685	20.8896
khsrp	1	complement(54960189..54972236)	ENSDARG00000026489	1.47864	0.564274	0.149544	-1.33123	-0.412762	0.618318	-1.96842	-0.977036	0.000831949	22.2946	17.7661	15.8264	15.0275	21.9693	24.8467	19.949	15.6039	13.2201	11.212	10.5295	14.7146
slc25a23a	1	complement(54974191..54997746)	ENSDARG00000005690	1.46442	0.550327	0.246163	-1.44203	-0.528105	0.484499	-2.11174	-1.07843	0.00122951	4.8107	2.84902	5.47076	4.09498	6.10284	4.1691	5.28908	3.96678	2.59739	1.55246	3.13662	3.84384
si:ch211-196h16.12	1	55002583..55007223	ENSDARG00000028276	-1.4442	-0.530273	0.846615	-1.35917	-0.442723	0.964796	1.06256	0.0875499	0.982173	0.229941	0.815449	0.271135	1.38656	0.401091	0.357562	0.633267	0.168315	1.41851	0.592853	0	0
vps54	1	complement(55006945..55044371)	ENSDARG00000102960	-1.10462	-0.143547	0.850944	-1.16411	-0.219223	0.93592	-1.05386	-0.0756767	0.950363	2.30289	1.64907	2.62843	2.56877	2.07287	1.91678	1.40939	1.11299	2.52387	1.66199	1.41827	1.77257
zgc:136864	1	complement(55007272..55008882)	ENSDARG00000059816	1.22358	0.291105	0.744629	1.17057	0.227213	0.93592	-1.04528	-0.0638921	0.975134	16.0717	21.2603	16.5445	36.4798	31.6682	18.4463	27.1662	12.3245	31.5499	13.1547	34.1433	23.1355
peli1a	1	complement(55044658..55068941)	ENSDARG00000091592	-1.55603	-0.637865	0.268693	-2.00842	-1.00606	0.0389249	-1.29074	-0.368196	0.66122	5.1416	11.9838	8.52571	3.82362	3.25813	4.49735	3.33723	4.07234	4.19492	2.77903	2.96721	4.3501
lgalsla	1	55080797..55089987	ENSDARG00000059060	-1.02568	-0.0365739	0.969314	-1.86197	-0.896827	0.381944	-1.81536	-0.860253	0.249359	4.06352	4.36918	4.38371	4.50592	4.63741	1.31082	5.59555	1.93023	3.92399	1.33748	1.80233	1.93831
aftpha	1	55095314..55109914	ENSDARG00000069249	-1.22598	-0.293931	0.626393	-1.1064	-0.145868	0.939363	1.10808	0.148063	0.861612	11.7972	6.65587	8.60906	9.48742	4.89269	6.25393	5.8694	5.94818	7.41583	6.84194	6.72958	9.56113
sertad2a	1	complement(55112801..55118745)	ENSDARG00000093412	1.11927	0.162555	0.875835	1.32283	0.40363	0.870801	1.18187	0.241075	0.828377	5.1374	3.18832	3.87698	5.75322	3.22606	3.59494	4.99918	3.98616	5.88578	6.0047	5.02886	5.38789
rab1aa	1	complement(55124296..55131439)	ENSDARG00000052263	-1.02392	-0.0341055	0.969314	-1.28028	-0.356461	0.870801	-1.25037	-0.322355	0.704026	17.4428	10.3493	20.2513	13.9856	12.5214	10.1193	16.0127	8.54472	10.1692	10.3783	12.7692	11.0127
mb	1	55137943..55145085	ENSDARG00000031952	1.73068	0.791343	0.480237	-1.10364	-0.142266	0.986036	-1.91005	-0.933609	0.370828	1565.38	1839.14	466.159	442.826	421.199	2004.49	1302.49	2053.58	1010.12	1628.11	573.306	319.178
pane1	1	complement(55161083..55166611)	ENSDARG00000024681	-1.14206	-0.191643	0.879878	1.28546	0.362288	0.933156	1.46808	0.553931	0.602282	3.90802	4.69424	2.82435	4.0181	2.85868	3.03852	3.93481	1.19962	7.88806	4.55044	2.85652	3.83223
zgc:158803	1	complement(55169130..55183088)	ENSDARG00000019765	1.11495	0.156985	0.807495	-1.05275	-0.0741661	0.981517	-1.17377	-0.231151	0.719501	15.8677	12.7866	15.6425	12.2856	11.542	14.4851	11.9424	11.0978	13.248	12.2017	10.3352	14.1095
mri1	1	complement(55191150..55210619)	ENSDARG00000075754	-1.37983	-0.464491	0.753104	-2.5389	-1.3442	0.309298	-1.84001	-0.879712	0.525022	1.15839	0.770257	1.87813	0.873144	0.378862	0.56291	1.06342	0.58295	0.191413	0.373331	0.45934	0.605233
CC2D1A	1	complement(55215787..55238610)	ENSDARG00000036281	-1.34259	-0.425023	0.597329	-1.23585	-0.305508	0.913379	1.08637	0.119515	0.927333	4.55249	1.96544	3.96771	2.28481	1.27747	1.72363	2.2895	1.9125	2.86077	2.0073	2.00929	2.55721
si:ch211-286b5.2	1	55239160..55247253	ENSDARG00000096514	1.83976	0.879514	0.792682	3.42892	1.77775	0.695631	1.86379	0.898238	0.761728	0.153129	0	0.0601876	0	0.222589	0.079373	0	0	0.0899672	0.175472	0.0925273	0.31033
nanos3	1	complement(55247370..55248496)	ENSDARG00000068255	-1.12153	-0.16547	0.969314	1.63188	0.706537	0.93592	1.83021	0.872007	0.808874	0.105483	0.280559	0	0.0908672	0	0.164028	0.096835	0.0772126	0.557765	0.0906551	0.191212	0
si:ch211-286b5.4	1	complement(55250107..55263740)	ENSDARG00000089765	-2.5944	-1.3754	0.842511	-3.0085	-1.58904	0.93592	-1.15961	-0.213643	0.982173	0	0	0	0.0630975	0	0	0	0	0	0	0	0
si:ch211-286b5.5	1	complement(55264025..55270966)	ENSDARG00000096661	1.26718	0.341627	0.5885	1.12036	0.163957	0.937786	-1.13106	-0.177671	0.835796	74.052	91.783	61.6194	65.818	76.8975	101.48	63.3199	55.8369	108.15	67.6865	61.8429	76.699
BX284640.1	1	55264712..55275813	ENSDARG00000110697	#N/A	#N/A	#N/A	#N/A	#N/A	#N/A	#N/A	#N/A	#N/A	0	0	0	0	0	0	0	0	0	0	0	0
si:ch211-286b5.6	1	55279124..55287260	ENSDARG00000096576	-1.86569	-0.899712	0.654725	1.55183	0.633974	0.93592	2.89525	1.53369	0.318117	0.927659	0.246735	0.820388	0	0.283174	0.360632	0	0.135807	0.776656	0.597942	0.126119	1.30424
zgc:172106	1	55293424..55299173	ENSDARG00000017984	-14.0677	-3.81431	0.000111707	-1.2987	-0.377069	0.954185	10.8321	3.43724	0.000645937	5.0587	3.61856	3.11806	0.14856	0.401091	0.0893906	0.0527722	0.0841573	4.50882	3.01367	0.41682	0.524244
si:ch211-286b5.8	1	55304374..55310703	ENSDARG00000096625	-2.00268	-1.00193	0.797268	-1.29551	-0.373517	0.982781	1.54586	0.628414	0.890255	0.238474	0	0.421796	0	0.103994	0	0	0.0872804	0.210164	0.102476	0.108072	0
si:ch211-286b5.9	1	55348537..55353978	ENSDARG00000086166	-1.65834	-0.729744	0.728209	-1.11514	-0.157228	0.992989	1.48711	0.572516	0.821071	0.622044	0.490218	1.05948	0	0.180841	0.161215	0.444146	0.202369	0.426377	0.1782	0.187933	0.997995
CR788255.1	1	55452892..55453752	ENSDARG00000087148	1.10852	0.148638	0.969314	3.22988	1.69148	0.827586	2.91368	1.54284	0.63279	0.368048	0	0	0	0	0	0	0.269407	0.162178	0.31631	0.333585	0.419558
si:dkey-9c18.3	1	55476002..55477135	ENSDARG00000096579	-6.14932	-2.62043	0.650309	-1.47233	-0.558102	0.971864	4.17659	2.06233	0.773096	0	0.175078	0	0.340224	0	0	0	0	0.348062	0	0	0
adgre9	1	55478653..55515184	ENSDARG00000096577	-1.09353	-0.128995	0.944687	-1.05953	-0.0834246	0.995172	1.03209	0.0455702	0.982173	1.34665	0.397974	0.838062	0.998938	0.358874	0.785276	0.789823	0.575013	0.824157	0.578675	0.271235	1.44984
adgre16	1	55535827..55540577	ENSDARG00000096622	-6.88602	-2.78367	0.0206289	-1.13581	-0.18372	0.983156	6.06266	2.59995	0.0304514	2.00404	0.49749	0.472613	0.897704	0.139827	0	0.0735893	0.176032	1.27161	0.344465	0.508588	1.03565
adgre15	1	55563532..55574266	ENSDARG00000096588	-1.4941	-0.579275	0.730154	1.04102	0.0579942	0.995172	1.55538	0.637269	0.710413	1.93994	0.343984	0.457497	1.13637	0.473743	0.663661	0.356178	0.454405	1.4361	0.733584	0.210995	1.35635
adgre19	1	55583116..55587666	ENSDARG00000096649	1.10042	0.138052	0.969314	4.79224	2.2607	0.394954	4.35492	2.12265	0.270347	0.406009	0.0719923	0	0	0	0.252541	0.149089	0	1.07343	0.139574	0.0735984	0.987375
umod	1	55600504..55606573	ENSDARG00000086117	1.05916	0.0829218	0.969314	-4.61138	-2.2052	0.551508	-4.88419	-2.28812	0.303115	0.756592	0.335392	0.111517	0.162939	0	0.147064	0.868202	0.138454	0.0833467	0	0.0857184	0.0718734
adgre18	1	55608520..55617155	ENSDARG00000096644	-2.08765	-1.06188	0.419714	-4.13402	-2.04754	0.0646669	-1.98022	-0.985661	0.562246	1.76977	1.028	1.15135	0.420564	0.212899	0.616832	0.672277	0.134012	0.484036	0.0524478	0.0553121	0.371026
adgre7	1	55643198..55646413	ENSDARG00000041399	-1.16441	-0.219595	0.923989	-1.36627	-0.450241	0.93592	-1.17336	-0.230646	0.935841	0.953761	0.241597	0.642645	0.469489	0.17825	0.582653	0.437783	0.299204	0.420268	0.175647	0	0.931923
adgre8	1	55662491..55668390	ENSDARG00000079050	1.71081	0.774682	0.436186	1.7281	0.789189	0.671689	1.01011	0.0145066	0.991414	1.1524	0.537739	1.64493	1.30622	1.58697	1.69769	2.33856	0.665959	1.38976	1.87656	1.26439	2.81175
adgre6	1	55703120..55707336	ENSDARG00000095494	-1.08154	-0.113086	0.969314	1.08543	0.118268	0.995172	1.17394	0.231355	0.968997	0.0919408	0.163027	0	0.237604	0.160374	0	0.0844029	0.1346	0.0810261	0	0.249995	0.209617
adgre17	1	55723870..55728458	ENSDARG00000095297	-1.45471	-0.54073	0.733076	-1.79982	-0.847854	0.810561	-1.23724	-0.307124	0.877779	1.04442	0.435749	0.724429	1.1114	0.321494	0.477674	0.620394	0.359767	0.541431	0.211201	0.0556837	0.887107
adgre10	1	55730205..55747003	ENSDARG00000075855	1.22024	0.287164	0.708739	-1.06908	-0.0963719	0.981318	-1.30454	-0.383536	0.604417	5.47665	3.63437	3.09356	3.92679	3.54664	5.86452	3.79331	2.37651	5.49123	2.25475	2.91291	3.63871
dnajb1b	1	complement(55745878..55750208)	ENSDARG00000041394	1.2308	0.299591	0.609444	-1.32166	-0.402347	0.696175	-1.62669	-0.701937	0.0572375	14.4467	13.351	13.8589	12.6032	12.1194	18.6573	12.1946	9.81312	12.0304	8.94367	8.04504	9.53691
tecrb	1	55752593..55777154	ENSDARG00000025904	1.11245	0.153736	0.826661	1.05864	0.0822093	0.979863	-1.05083	-0.071527	0.943125	44.3954	42.3749	45.1622	40.8413	38.608	43.3967	36.574	32.5439	40.0862	43.6683	38.7265	47.8296
ndufb7	1	complement(55780128..55785722)	ENSDARG00000033789	1.2626	0.336396	0.66623	1.1978	0.260385	0.93592	-1.0541	-0.0760117	0.960566	303.424	401.476	317.56	368.784	315.955	370.383	369.987	337.338	382.542	473.609	373.485	323.271
zgc:136908	1	complement(55786986..55810730)	ENSDARG00000011983	-1.04705	-0.0663308	0.9599	1.06886	0.0960688	0.982781	1.11915	0.1624	0.868	124.317	107.862	166.901	95.4705	72.2226	100.692	74.9908	114.607	113.144	127.354	123.549	123.12
samd1b	1	complement(55817653..55840105)	ENSDARG00000079062	1.85802	0.893768	0.194431	-1.07085	-0.0987535	0.990175	-1.98966	-0.992522	0.118401	1.85026	1.1893	0.92724	0.99618	1.33132	1.90614	2.29307	1.69297	0.856071	0.75533	1.17391	1.51161
prkacab	1	complement(55843552..55873178)	ENSDARG00000016809	1.33759	0.419633	0.386457	-1.04426	-0.0624878	0.98775	-1.3968	-0.482121	0.279336	13.0651	13.0066	13.1975	10.8707	14.1172	15.7748	13.3039	9.85732	14.8544	11.3435	8.04271	10.9458
asf1bb	1	complement(55878113..55888970)	ENSDARG00000043713	1.30947	0.388988	0.527403	1.21306	0.278647	0.901892	-1.07948	-0.110341	0.907462	11.2234	7.0701	10.8833	10.4952	10.497	14.5247	9.1509	6.70205	14.2509	11.8033	8.96785	9.59563
si:ch73-343l4.8	1	complement(55891376..55896332)	ENSDARG00000077975	-1.69647	-0.762535	0.815531	2.96115	1.56616	0.605843	5.0235	2.32869	0.194826	0.123833	0.219577	0.146018	0.213348	0	0.288843	0	0	0.436528	0.425701	0.336713	0.846983
si:ch73-343l4.6_1	1	complement(55903811..55905967)	ENSDARG00000025547	-2.5944	-1.3754	0.842511	-3.0085	-1.58904	0.93592	-1.15961	-0.213643	0.982173	0	0	0	0.319026	0	0	0	0	0	0	0	0
si:ch73-343l4.5	1	complement(55908578..55918530)	ENSDARG00000076778	#N/A	#N/A	#N/A	#N/A	#N/A	#N/A	#N/A	#N/A	#N/A	0	0	0	0	0	0	0	0	0	0	0	0
si:ch73-343l4.6_2	1	complement(55920864..55922057)	ENSDARG00000095127	#N/A	#N/A	#N/A	#N/A	#N/A	#N/A	#N/A	#N/A	#N/A	0	0	0	0	0	0	0	0	0	0	0	0
si:ch73-343l4.3	1	complement(55925810..55930414)	ENSDARG00000092502	1.22408	0.291702	0.969314	5.11304	2.35418	0.901892	4.17703	2.06248	0.766258	0	0	0	0	0	0	0	0	0	0	0.677661	0
si:ch73-343l4.2	1	complement(55938565..55942055)	ENSDARG00000079903	1.24089	0.311381	0.868725	1.50302	0.587866	0.910816	1.21124	0.276485	0.896241	0.945991	1.6774	0.743644	0.452729	1.19175	0.40862	0.868432	1.23103	1.20422	0.722676	0.571608	3.11534
si:ch73-343l4.1	1	complement(55947389..55947671)	ENSDARG00000094357	-7.92622	-2.98663	0.57188	-9.19135	-3.20028	0.805977	-1.15961	-0.213643	0.982173	1.12682	0	0	0.970685	0	0	0	0	0	0	0	0
c3a.4	1	complement(55997173..56032619)	ENSDARG00000093198	3.19226	1.67458	0.0690426	1.98005	0.985537	0.678343	-1.61221	-0.689041	0.653947	1.42298	0.384894	0.853177	0.290871	3.30251	0.393797	2.63478	0.75914	1.59414	0.20728	1.70508	1.85125
c3a.6	1	complement(56036644..56080165)	ENSDARG00000043719	2.60909	1.38355	0.747845	4.16573	2.05857	0.822432	1.59662	0.675024	0.86417	0.0230744	0	0	0	0.0201246	0.0179406	0	0.0168903	0.0203352	0.0396616	0.0627415	0
c3a.5	1	complement(56107522..56122485)	ENSDARG00000053462	1.22423	0.291869	0.969314	8.93763	3.15989	0.852055	7.30064	2.86802	0.644466	0	0	0	0	0	0	0	0	0.171538	0	0	0
c3a.1	1	complement(56130222..56176976)	ENSDARG00000012694	1.92617	0.945736	0.401144	-1.06312	-0.0883018	0.995172	-2.04775	-1.03404	0.339714	0.539402	0.207924	0.967882	0.90912	2.2295	0.346452	0.602826	0.70384	0.620044	0.1814	0.807738	0.71292
crb3b	1	56180416..56184928	ENSDARG00000068182	-1.14051	-0.189674	0.834243	-1.05508	-0.0773478	0.988414	1.08097	0.112326	0.921128	12.0125	12.2279	7.65937	10.4247	7.52781	10.6543	5.79973	5.53636	14.8995	9.10032	5.40353	8.92628
si:dkey-76b14.2	1	complement(56188094..56213860)	ENSDARG00000078503	-1.6021	-0.679966	0.59293	1.29742	0.375647	0.93592	2.0786	1.05561	0.286506	1.5933	0.288284	0.651807	0.616236	0.48211	0.252817	0.626858	0.14281	1.11759	0.503017	0.648374	1.45797
zgc:65894	1	complement(56217388..56223913)	ENSDARG00000016301	1.25916	0.332463	0.701993	1.46935	0.555175	0.686267	1.16693	0.222712	0.836365	5.05091	6.36015	4.66106	5.35999	3.89446	6.20373	6.11521	5.19754	7.99944	9.49964	5.17509	6.89825
c3a.2	1	56229674..56266731	ENSDARG00000087359	-1.4165	-0.50233	0.860521	-2.00725	-1.00522	0.901892	-1.41705	-0.50289	0.892087	0.0460149	0.0407961	0.0271293	0.0594585	0.0401324	0.0178885	0	0.0336824	0.0608284	0.0197732	0	0
c3a.3	1	56274613..56320569	ENSDARG00000052207	1.87487	0.906794	0.853613	2.30939	1.20751	0.93592	1.23176	0.300719	0.972736	0	0.0202336	0	0	0	0	0.0209509	0.0167054	0	0.0588414	0	0
gcgrb	1	complement(56344651..56363108)	ENSDARG00000036272	1.39832	0.483692	0.842511	1.11594	0.158266	0.995172	-1.25303	-0.325427	0.90575	0.187902	0	0.221565	0.215821	0.163881	0.243493	0.114998	0.137543	0.110397	0.0538294	0.227077	0.238
FO905027.1	1	complement(56413733..56419277)	ENSDARG00000110619	2.71047	1.43854	0.421868	4.73464	2.24326	0.163403	1.7468	0.804715	0.713808	0	0.318259	0	0.515386	0.417441	1.44204	0	0.175176	1.73996	0.462765	0.704944	1.36404
slc25a10	1	complement(56421754..56435182)	ENSDARG00000025074	1.89959	0.925691	0.0885646	1.71635	0.779345	0.323421	-1.10676	-0.146346	0.898404	4.8539	5.79865	3.58931	5.27982	6.24244	12.7611	4.72029	6.05216	11.9992	10.4996	3.87744	5.3144
CABZ01059392.1	1	56447107..56458037	ENSDARG00000063108	-1.73408	-0.79417	0.428367	-1.53297	-0.616329	0.836332	1.13119	0.17784	0.922473	0.654483	0.822027	0.600238	0.657762	0.301263	0.494731	0.267033	0.199614	0.592808	0.0781223	0.428422	0.63555
zgc:171452	1	56463494..56468601	ENSDARG00000074069	-1.3778	-0.462368	0.907011	1.77343	0.826545	0.93592	2.44344	1.28891	0.695106	0.378999	0.22401	0.148966	0	0	0.392901	0	0	1.00202	0.108574	0.114504	0.0960094
CABZ01059403.1	1	56502706..56529192	ENSDARG00000088906	-1.58032	-0.660214	0.320395	-1.72929	-0.790177	0.328221	-1.09427	-0.129963	0.919575	4.91198	4.16646	3.31368	3.70245	1.60651	3.04795	1.86441	1.53847	3.18421	0.568278	2.29023	2.9433
CABZ01059406.1	1	complement(56533355..56537347)	ENSDARG00000088775	-1.32092	-0.401546	0.904981	2.81757	1.49445	0.640043	3.72179	1.896	0.284285	0.11672	0.0517412	0	0.150821	0	0.090751	0.0535754	0.042719	0.411455	0.150469	0.211582	0.177408
CABZ01059407.1	1	complement(56546605..56548178)	ENSDARG00000115164	-2.63018	-1.39516	0.457541	-1.69674	-0.762766	0.909596	1.55014	0.632396	0.823158	1.78644	0.863908	0.957493	1.67881	0.70821	0	0.149089	0.594389	0.143124	0	0.883181	1.85133
CABZ01059408.1	1	complement(56553900..56556326)	ENSDARG00000116928	-1.64124	-0.714788	0.787864	-1.34646	-0.429177	0.962177	1.21893	0.285612	0.942059	0.970445	0.573588	0.190717	0.557319	0.282128	0.125755	0	0.591963	0.28508	0	0.293192	0.983345
LO018605.1	1	complement(56595955..56596701)	ENSDARG00000093082	1.1461	0.196736	0.935981	1.20466	0.268626	0.974712	1.05109	0.0718899	0.982173	1.43228	0.846561	0.938266	0.822548	0.555191	1.73229	0.87657	0.465963	2.38425	0	0.721205	1.57227
FO681314.1	1	complement(56714284..56717813)	ENSDARG00000104258	1.22447	0.292153	0.969442	244.578	7.93415	0.0392007	199.742	7.642	0.0208753	0	0	0	0	0	0	0	0	3.09029	0.650001	0	0
CABZ01049361.1	1	56755536..56760851	ENSDARG00000104284	-2.02281	-1.01636	0.394391	-1.75554	-0.811919	0.809818	1.15224	0.20444	0.930785	2.71043	0.91315	0.894882	1.30753	0.520065	0.337181	0.895756	0.436482	1.38543	0.186353	0.245664	1.3183
CABZ01049362.1	1	56768263..56769327	ENSDARG00000099508	-1.702	-0.767228	0.816453	-3.56743	-1.83489	0.791219	-2.09603	-1.06766	0.792989	0.947786	0	0	0.933096	0.590444	0	0.248595	0	0.357973	0	0	0.102898
FO680692.1	1	56779495..56786921	ENSDARG00000109228	#N/A	#N/A	#N/A	#N/A	#N/A	#N/A	#N/A	#N/A	#N/A	0	0	0	0	0	0	0	0	0	0	0	0
si:ch211-1f22.3	1	56801021..56805426	ENSDARG00000101532	1.56221	0.64359	0.88364	1.71717	0.780036	0.952339	1.09919	0.136446	0.982173	0.180943	0	0	0	0	0	0.249162	0	0.159462	0	0.082	0.0687556
si:dkey-27j5.6_1	1	56813845..56816695	ENSDARG00000096621	1.22408	0.291702	0.969314	5.11276	2.3541	0.901892	4.17681	2.0624	0.766258	0	0	0	0	0	0	0	0	0.104662	0	0.10764	0
si:ch211-1f22.5	1	56823437..56827882	ENSDARG00000054655	-1.62467	-0.70015	0.797971	-2.71945	-1.44332	0.822682	-1.67384	-0.743165	0.841506	0.498446	0	0.440808	0.429381	0	0.29066	0.114395	0.182429	0.109818	0	0	0.284103
si:ch211-152f2.1	1	56843411..56845476	ENSDARG00000092322	1.41332	0.499093	0.903099	2.56511	1.35902	0.872221	1.81495	0.85993	0.81468	0.0968863	0.171796	0	0	0	0.22599	0	0.0709198	0.341538	0.0832667	0	0.294523
si:ch211-1f22.6	1	56852400..56857465	ENSDARG00000096656	5.93206	2.56853	0.681487	5.11304	2.35418	0.903497	-1.16018	-0.214352	0.982173	0	0	0	0	0.093745	0	0	0.0786787	0	0	0.194843	0
si:ch211-1f22.7	1	56859745..56864253	ENSDARG00000096543	-4.36518	-2.12604	0.736974	-1.04668	-0.0658154	0.995172	4.17052	2.06023	0.774727	0	0	0	0.210282	0	0	0	0	0.215127	0	0	0
si:ch211-152f2.2	1	56873359..56878634	ENSDARG00000034910	1.68838	0.755644	0.779937	1.2841	0.360756	0.97732	-1.31484	-0.394888	0.896231	0.157248	0.139414	0.0927096	0	0.137145	0.0611309	0.216534	0.115104	0.13858	0.0675716	0.0712619	0.179256
si:ch211-1f22.8	1	56886214..56893355	ENSDARG00000096507	-1.04358	-0.0615478	0.98282	-1.2181	-0.284636	0.990435	-1.16723	-0.223089	0.976879	0.228908	0	0	0.19719	0	0	0.280187	0.0558528	0	0.131153	0.0691579	0.115975
si:ch211-152f2.3	1	56900580..56904810	ENSDARG00000043445	1.41345	0.499225	0.900406	1.21822	0.284774	0.991841	-1.16026	-0.21445	0.977931	0.0984102	0	0.232081	0	0.171659	0	0.180684	0	0.0867275	0.0845764	0.178391	0
si:ch211-1f22.9	1	56919742..56922160	ENSDARG00000096585	1.12664	0.172024	0.969314	-3.00858	-1.58908	0.93592	-3.38958	-1.76111	0.821071	0	0.142814	0	0	0	0	0	0.117911	0	0	0	0
si:ch211-152f2.4	1	56929873..56932578	ENSDARG00000096574	3.34081	1.7402	0.668104	2.88024	1.52619	0.903385	-1.15991	-0.214008	0.978056	0.122683	0	0	0	0	0.286161	0.112624	0	0	0.105437	0	0.279705
si:ch211-1f22.1	1	complement(56943492..56948694)	ENSDARG00000013203	1.08678	0.120065	0.969314	-1.37261	-0.456922	0.955405	-1.49173	-0.576987	0.833623	0.468029	0.207474	0.275939	0.503973	0.510246	0.363897	0.214829	0.171296	0.412468	0	0	0.533532
si:ch211-1f22.2	1	complement(56950797..56951369)	ENSDARG00000096666	1.01546	0.0221389	0.995678	2.3146	1.21076	0.93592	2.27936	1.18863	0.798315	0	0	0.489274	0	0	0.322617	0	0	0.914196	0.178304	0	0
si:ch211-1f22.10	1	56955349..56960001	ENSDARG00000096619	-7.92754	-2.98687	0.587191	1.1538	0.20639	0.995172	9.14678	3.19326	0.565725	0.100236	0.0888674	0.236386	0	0	0	0	0	0.176673	0	0	0.228528
si:ch211-1f22.11	1	56972616..56981521	ENSDARG00000094524	-2.35156	-1.23362	0.731081	-1.53274	-0.616109	0.961394	1.53422	0.617508	0.898065	0.448602	0	0	0.193221	0	0.087198	0.102956	0	0.0988366	0	0	0.255693
si:ch211-1f22.12	1	56992262..56996143	ENSDARG00000093845	1.70281	0.767917	0.843031	1.79251	0.841979	0.937885	1.05268	0.074062	0.984415	0	0	0.230176	0.0840782	0	0	0.0896002	0.285775	0.0860154	0	0	0.445048
si:ch211-1f22.13	1	57004178..57008386	ENSDARG00000096623	-7.53887	-2.91435	0.622908	1.75669	0.812861	0.937306	13.2435	3.72721	0.490605	0.410992	0	0	0	0	0	0	0	0.452752	0	0	0.234256
si:ch211-1f22.16	1	57040472..57044846	ENSDARG00000096670	-3.05376	-1.61059	0.620777	-1.0079	-0.0113471	0.997686	3.02983	1.59924	0.650819	0.350677	0.062181	0.165401	0	0.0611693	0	0.0643852	0	0	0.301381	0.127136	0.0533008
si:ch211-1f22.14	1	57050899..57059786	ENSDARG00000062309	-1.64329	-0.716589	0.730154	-1.4171	-0.502942	0.93592	1.15962	0.213648	0.955422	0.129147	0.286249	0.532992	0.333755	0.168955	0.150619	0.118558	0.141801	0.45526	0.0554961	0.0585269	0.245369
si:ch73-94k4.1	1	57118783..57120505	ENSDARG00000096634	5.93208	2.56854	0.678796	3.08399	1.6248	0.93592	-1.92351	-0.943741	0.861566	0	0	0	0	0.279843	0	0	0	0	0	0	0.121923
rac1l_1	1	complement(57128562..57129299)	ENSDARG00000096549	-1.13684	-0.185035	0.969314	-1.46026	-0.54623	0.961416	-1.28449	-0.361195	0.935841	0.322167	0.285628	0	0.693816	0.421471	0.250487	0	0.235823	0.14196	0.692197	0	0
si:dkey-27j5.10_1	1	57132140..57236167	ENSDARG00000096671	-1.44587	-0.531942	0.818995	-1.13759	-0.18598	0.990175	1.271	0.345963	0.902897	0.191741	0.024285	0.0645977	0.141577	0.0716696	0.0425944	0.0754376	0.0401007	0.120699	0.0470822	0.0248267	0.145717
si:ch73-94k4.4	1	57145072..57145503	ENSDARG00000096606	-1.10636	-0.145825	0.969314	-1.30413	-0.383085	0.983156	-1.17875	-0.23726	0.977302	0	1.75661	0	0.426697	0.864016	0	0.909442	0	0	0.851402	0	0.752873
si:ch73-94k4.5	1	57151926..57160654	ENSDARG00000096523	1.54842	0.630794	0.872579	-1.04661	-0.0657233	0.995172	-1.62059	-0.696517	0.869746	0.104007	0	0	0.0895952	0.0907104	0	0.190959	0	0	0.0893861	0.0942677	0
rac1l_2	1	complement(57170145..57172294)	ENSDARG00000054649	1.24757	0.319116	0.842511	1.35823	0.441732	0.935711	1.08871	0.122616	0.962807	0.829392	0.686305	0.521589	0.666838	0.434018	0.429906	1.06595	0.728528	0.536016	1.14048	0.551269	1.17658
si:dkey-27j5.6_2	1	57176256..57180904	ENSDARG00000086301	-1.63567	-0.709881	0.842511	-3.14604	-1.65354	0.880437	-1.9234	-0.943658	0.86417	0.250536	0	0	0.215821	0	0.0973971	0	0.0916951	0	0	0	0.0952
si:dkey-27j5.9	1	57187794..57195815	ENSDARG00000096509	-1.94018	-0.956192	0.757513	1.11142	0.152408	0.995172	2.15636	1.1086	0.72976	0.472995	0.419351	0.557733	0	0	0	0	0.461637	0.555792	0	0.428706	0.479283
si:dkey-27j5.11	1	57198387..57202346	ENSDARG00000096650	-1.29741	-0.37564	0.945422	1.66672	0.737008	0.943439	2.16242	1.11265	0.795995	0	0	0.563714	0	0	0	0.146291	0.116647	0.140438	0	0.144434	0.484423
si:dkey-27j5.10_2	1	57208005..57213362	ENSDARG00000094157	#N/A	#N/A	#N/A	#N/A	#N/A	#N/A	#N/A	#N/A	#N/A	0	0	0	0	0	0	0	0	0	0	0	0
si:dkey-27j5.10_3	1	57218301..57224222	ENSDARG00000096534	#N/A	#N/A	#N/A	#N/A	#N/A	#N/A	#N/A	#N/A	#N/A	0	0	0	0	0	0	0	0	0	0	0	0
si:dkey-27j5.7	1	57235896..57238464	ENSDARG00000096570	1.09095	0.125579	0.969314	-1.10226	-0.14047	0.995172	-1.20251	-0.266049	0.935841	0.80324	0.23738	0.789285	0.230647	0.583795	0.208175	0.614488	0.293982	0.589903	0	0.121338	0.915657
mycbpap	1	57269441..57317797	ENSDARG00000069194	-2.26009	-1.17638	0.774399	-1.04343	-0.0613328	0.995172	2.16602	1.11505	0.81488	0.15369	0.0681298	0	0	0	0	0.0705449	0	0.169306	0.0330214	0	0
si:dkey-27j5.5	1	complement(57277945..57280585)	ENSDARG00000026383	1.54843	0.630809	0.875933	-5.06945	-2.34183	0.901892	-7.84971	-2.97264	0.614986	0.130065	0	0	0	0	0	0.119402	0.0476032	0	0	0	0
epn3b	1	57331813..57340192	ENSDARG00000004633	-1.16703	-0.222836	0.969314	-1.89713	-0.923818	0.93592	-1.62561	-0.700982	0.88006	0.21053	0	0	0.0604529	0	0	0.0644233	0.102737	0	0	0	0.106664
b3gntl1	1	57347888..57365052	ENSDARG00000043431	-1.69075	-0.757662	0.515889	-1.13655	-0.184656	0.976982	1.48762	0.573006	0.690942	1.25732	0.724568	1.40844	0.974792	0.383804	0.342152	0.346271	0.82831	0.831043	0.648344	0.854691	1.14663
metrnlb	1	57371447..57382010	ENSDARG00000007289	-1.25503	-0.327718	0.690616	-1.26608	-0.340373	0.900169	-1.00881	-0.0126548	0.989505	13.4051	16.6755	34.064	17.0977	14.6822	13.6544	10.8751	11.638	10.0737	20.8088	14.1278	13.5043
zgc:171470	1	complement(57497959..57501299)	ENSDARG00000057844	3.57804	1.83917	0.797268	3.08399	1.6248	0.93592	-1.1602	-0.214373	0.982173	0	0	0	0	0.060456	0	0	0	0	0	0	0.0526792
tspan34	1	57521361..57533548	ENSDARG00000103951	#N/A	#N/A	#N/A	#N/A	#N/A	#N/A	#N/A	#N/A	#N/A	0	0	0	0	0	0	0	0	0	0	0	0
zmp:0000001289	1	complement(57620964..57629639)	ENSDARG00000089894	8.28569	3.05062	0.597076	11.198	3.48517	0.786948	1.35148	0.434544	0.909073	0	0	0	0	0	0.0632648	0	0.119122	0.071709	0.0699304	0.0737495	0.123675
si:dkey-1c7.1	1	57724157..57763348	ENSDARG00000074334	2.26619	1.18027	0.695775	-2.22503	-1.15383	0.93592	-5.04235	-2.33409	0.421304	0.0405871	0	0.0478583	0.10489	0.21239	0.157784	0	0	0	0	0.0735733	0
LO018597.1	1	57741577..57743393	ENSDARG00000105181	-2.59436	-1.37538	0.842511	-1.02974	-0.042284	0.995172	2.51943	1.3331	0.86417	0.144096	0	0	0	0	0	0	0	0	0	0	0.109509
LO018597.2	1	57744400..57750367	ENSDARG00000113965	-2.59456	-1.37549	0.842511	-3.00868	-1.58913	0.93592	-1.15961	-0.213643	0.982173	0	0	0.162807	0	0	0	0	0	0	0	0	0
si:dkey-1c7.2_1	1	57774454..57779848	ENSDARG00000088556	-2.12116	-1.08486	0.594648	-1.67797	-0.74672	0.909596	1.26412	0.338137	0.918526	0.411704	0.912526	0.364096	0.177329	0.0897679	0.160052	0.283462	0.150682	0.544243	0.265372	0.0932883	0.156441
si:dkey-1c7.2_2	1	57787642..57793729	ENSDARG00000104859	-1.16149	-0.215973	0.960514	1.04983	0.0701504	0.995172	1.21936	0.286123	0.947691	0.140188	0.0621443	0.247954	0.181145	0.122266	0.0544987	0.257389	0	0.185319	0.361444	0	0.0532693
si:dkey-1c7.3	1	complement(57831922..57839070)	ENSDARG00000074205	-9.94304	-3.31369	3.25947e-05	-1.39522	-0.480488	0.93592	7.12653	2.8332	0.000627059	20.8698	7.80901	3.30762	3.76959	0	1.30859	0	1.23198	8.25675	2.21791	5.49164	7.50386
si:dkey-156m2.3	1	57966831..57980061	ENSDARG00000078620	-2.47822	-1.3093	0.000335821	-1.22733	-0.295524	0.900246	2.01919	1.01378	0.0112972	3.49699	2.04561	3.18825	3.68014	1.10049	0.826894	1.27418	0.725705	3.22482	1.62664	1.8135	2.87679
si:ch211-114l13.12	1	57981823..57991025	ENSDARG00000088019	-1.05939	-0.0832316	0.969314	1.4681	0.553945	0.93592	1.55528	0.637177	0.753813	1.02805	0.497155	0.330606	0.402544	0.652088	0.072665	0.94376	0.0684109	0.658911	0.562247	0.931783	0.923335
si:ch211-114l13.9	1	complement(57997535..58002973)	ENSDARG00000092894	-1.99781	-0.99842	0.0596706	-1.0762	-0.105942	0.982781	1.85636	0.892478	0.10054	17.4483	16.2149	9.91526	12.0426	2.0168	7.84551	6.07903	5.8474	14.6359	8.67211	9.14572	16.7749
nxnl1	1	complement(58005222..58009216)	ENSDARG00000052035	#N/A	#N/A	#N/A	#N/A	#N/A	#N/A	#N/A	#N/A	#N/A	0	0	0	0	0	0	0	0	0	0	0	0
COLGALT1	1	complement(58013076..58036509)	ENSDARG00000058270	1.11965	0.163044	0.899338	-1.18056	-0.239468	0.943158	-1.32181	-0.402513	0.736304	1.43859	0.695688	1.465	0.70412	0.855462	0.889727	1.0205	0.885503	0.777971	0.393387	0.948277	1.19267
trim35-1	1	58039551..58049515	ENSDARG00000052037	-1.42882	-0.514819	0.433809	-1.0949	-0.130801	0.970161	1.30497	0.384018	0.635616	4.40942	3.41291	2.3521	2.71317	1.86182	1.60535	1.86332	1.71629	3.2383	2.43616	2.06171	3.29784
caspb	1	complement(58050905..58064738)	ENSDARG00000052039	-1.60966	-0.686753	0.183527	-1.79354	-0.842814	0.10959	-1.11424	-0.156061	0.868174	74.1771	58.5795	27.6655	43.6315	20.0638	37.1955	23.9985	18.7528	40.3747	19.7709	19.4882	28.3104
si:ch211-114l13.4	1	58066109..58076716	ENSDARG00000078246	-2.13135	-1.09177	0.362358	-1.42228	-0.508201	0.933454	1.49855	0.583566	0.741577	0.777244	1.75719	1.28308	1.7743	0.0338941	1.08777	0.784873	0.284467	0.410985	0.43419	1.47938	1.44717
si:ch211-114l13.13	1	58079053..58088949	ENSDARG00000094346	-4.6814	-2.22694	0.167038	-1.98454	-0.988807	0.885952	2.35893	1.23813	0.601788	0	1.08295	1.60977	2.04257	0.0313333	0.78212	0.0329807	0.0262976	0.126645	0.123504	0.651242	1.47435
si:ch211-114l13.1	1	58091659..58102982	ENSDARG00000093323	2.53143	1.33995	0.604253	4.94677	2.30649	0.37036	1.95414	0.966532	0.704026	0.0347906	0	0	0.14985	0.182058	0.1082	0.127753	0	0.0613209	0.2093	0.0315329	0.660995
caspbl	1	complement(58105762..58115298)	ENSDARG00000094433	-1.45021	-0.536264	0.852411	1.00722	0.0103733	0.997714	1.46068	0.546637	0.865689	0	8.30271	5.06409	13.4111	6.45086	5.05512	4.54493	0	0	6.10036	4.48725	16.0925
si:ch211-15j1.5	1	58116900..58132014	ENSDARG00000091912	-5.77326	-2.52939	0.094816	-1.72089	-0.783154	0.935711	3.35482	1.74623	0.351611	0.265712	2.35576	2.34986	2.49495	0	0.970989	0.0731781	0.0777994	0.0468336	0.045672	1.37274	2.88764
si:ch211-15j1.4	1	58137020..58145365	ENSDARG00000092604	-2.31724	-1.21241	0.537426	-1.2977	-0.375959	0.969484	1.78565	0.836451	0.738222	0.109432	1.00255	1.37639	1.82253	0.795351	0.368699	0.40184	0	0	0.564292	0.363679	2.35634
si:ch211-15j1.3	1	58150000..58155977	ENSDARG00000092070	-3.41664	-1.77258	0.265881	-1.68769	-0.755049	0.901892	2.02445	1.01753	0.670567	0.0383978	0.2383	0.407491	0.562314	0.066978	0.0895638	0.0704994	0.0562136	0.101518	0.0330001	0.139209	0.437717
si:ch211-15j1.7	1	58176023..58179756	ENSDARG00000096412	-1.79585	-0.84467	0.73841	1.33228	0.413896	0.961873	2.39258	1.25857	0.584144	0	0.500188	0.285106	0.277715	0.140586	0.0626643	0.295954	0	0.213085	0.346333	0.146099	0.673758
si:ch211-15j1.1	1	58182400..58187215	ENSDARG00000093177	-3.43152	-1.77885	0.359656	-1.33996	-0.422185	0.963367	2.56092	1.35666	0.572944	0	0.171154	0.455268	0.665198	0.16837	0.0300194	0.106333	0	0	0.132729	0.31495	0.469476
si:dkey-222h21.11	1	58194268..58197406	ENSDARG00000092984	-1.2703	-0.345167	0.893389	-1.82035	-0.864218	0.901892	-1.43301	-0.519052	0.86417	0.224725	0.0796951	0.105994	0.193587	0.0783985	0.0698903	0.206301	0.0328993	0.0396094	0.0772539	0	0.170784
si:dkey-222h21.12	1	58205904..58216018	ENSDARG00000092350	-2.62444	-1.39201	0.578141	-2.17631	-1.12188	0.885791	1.20591	0.270127	0.960386	0	0.388202	0.94656	0.817247	0	0.283701	0.401963	0	0	0.0627184	0.0661437	0.831904
si:dkey-222h21.10_1	1	58221372..58226861	ENSDARG00000094608	-1.41468	-0.500472	0.750424	1.11926	0.162549	0.985646	1.58339	0.663021	0.680483	0.229055	0.667252	1.42762	1.63491	0.371006	0.992228	0.811063	0.167666	0.490238	0.590568	1.24564	1.93969
si:dkey-222h21.9	1	58228542..58238120	ENSDARG00000093975	-3.71151	-1.89201	0.162178	-1.1535	-0.206012	0.987129	3.21762	1.68599	0.239243	0.0894503	1.40106	1.68761	3.26203	0.72814	0.57957	0.0821166	0.0654768	0.0525542	1.33252	1.70256	2.22066
ggt1l2.2	1	58242498..58257899	ENSDARG00000087054	-1.7189	-0.781488	0.759403	-1.43674	-0.522801	0.947162	1.19639	0.258687	0.951928	0	0.92504	0.538255	1.40438	0.853115	0.507021	0.0598645	0	0	0.28022	0.768362	0.89205
si:dkey-222h21.8	1	58260886..58268231	ENSDARG00000094344	-5.16975	-2.37009	0.122653	-1.5395	-0.622462	0.93592	3.35807	1.74763	0.341986	0.113075	1.26984	1.82221	1.62345	0	0.703335	0.103804	0	0.0664342	0.129573	1.16152	1.71867
si:dkey-222h21.7	1	58282449..58285475	ENSDARG00000095578	-3.16494	-1.66218	0.212615	1.5099	0.594454	0.903521	4.77874	2.25663	0.0346195	0.178632	0.197965	0.684561	0.615521	0.0389489	0.138888	0.163986	0.0653784	0.590346	0.230282	0.44524	1.15392
si:dkey-222h21.6	1	58290933..58297645	ENSDARG00000092294	-3.71317	-1.89265	0.327096	-1.64514	-0.718214	0.93592	2.25705	1.17444	0.670567	0.0799727	0.354513	0.3772	0.24112	0	0.186539	0	0.0292696	0	0.0343654	0.181211	0.39505
si:dkey-222h21.2_1	1	58303892..58309518	ENSDARG00000094297	-2.29739	-1.19999	0.406474	-1.23246	-0.301539	0.965236	1.86407	0.898455	0.615473	0.687606	0.135471	0.180176	0.822681	0.133267	0.0594022	0.315616	0.111849	0.302989	0.262643	0.173117	0.638684
si:dkey-222h21.10_2	1	58312187..58466934	ENSDARG00000094246	-1.53778	-0.620845	0.762046	-1.37689	-0.461411	0.935931	1.11685	0.159434	0.972736	0.135955	0.409823	0.160312	0.187388	0	0.295979	0.124809	0.0597108	0.143779	0.0701063	0.0739351	0.351295
si:dkey-222h21.3	1	58323980..58327250	ENSDARG00000092941	-1.16871	-0.224923	0.95972	1.2134	0.279059	0.986036	1.41812	0.503982	0.878039	0	0.114231	0.050642	0.406965	0.0749147	0	0.35484	0	0.0378493	0.184553	0.194632	0.261112
ggt1l2.1	1	58332000..58346871	ENSDARG00000075055	-3.29118	-1.71861	0.333212	-1.52582	-0.609583	0.93592	2.157	1.10902	0.644466	0	1.18092	1.06016	1.14742	0.11617	0.414252	0.366834	0	0	0.20033	0.663993	1.34125
si:dkey-222h21.2_2	1	58353661..58357992	ENSDARG00000095719	-1.16113	-0.215531	0.943748	1.10707	0.146749	0.995172	1.28546	0.362281	0.895862	0	0.135298	0.134959	0.361515	0.0998222	0.059326	0.245164	0.0558528	0.134489	0.0655766	0.172895	0.318932
si:dkey-222h21.1	1	58360935..58367172	ENSDARG00000092500	-1.48708	-0.572484	0.848	1.2824	0.358842	0.97895	1.90703	0.931326	0.766258	0	0	0.125046	0.426316	0.154151	0.0549687	0.0973533	0	0	0.12152	0.160196	0.402965
slc27a1b_1	1	58370526..58371503	ENSDARG00000038352	1.22408	0.291702	0.969314	5.1122	2.35394	0.901892	4.17635	2.06224	0.766258	0	0	0	0	0	0	0	0	0	0	0	0.223626
CU914631.1	1	58375871..58386128	ENSDARG00000098576	-4.99137	-2.31944	0.373164	-1.02142	-0.0305717	0.995172	4.88671	2.28886	0.395199	0	0.286016	0.190199	0.48633	0	0.0627068	0.0740387	0	0	0.485195	0.219297	0.183877
si:ch73-236c18.2_1	1	58393630..58397280	ENSDARG00000103829	-1.6125	-0.689297	0.754192	-1.54537	-0.62795	0.93592	1.04344	0.061347	0.982173	0.170681	0.151323	0.301889	1.28652	0.595446	0.265412	0.117516	0	0.150419	0.513408	0.154699	0.324281
si:ch73-59p9.2	1	58400409..58415954	ENSDARG00000091254	-2.88962	-1.53088	0.674216	-1.64264	-0.716015	0.96021	1.75913	0.814862	0.86417	0	0	0	1.42766	0.389155	0	0	0	0	0.657383	0	0.0968845
si:ch73-236c18.3	1	58424507..58434252	ENSDARG00000075541	-2.8665	-1.51929	0.711542	1.19856	0.261303	0.995172	3.43567	1.78059	0.681038	0	0	0	7.14958	1.95867	0.0759178	0	0	0	7.21682	0	0.0742052
zgc:194906_1	1	58442694..58451271	ENSDARG00000095773	-1.72617	-0.787575	0.660663	-1.90398	-0.929017	0.841119	-1.10301	-0.141442	0.975031	0.166358	0.648959	1.13774	1.23244	0.290182	0.672594	0.580332	0.0243545	0.146609	0.0571891	0.63328	0.783848
si:ch73-236c18.5	1	58456494..58459867	ENSDARG00000103330	-2.33318	-1.2223	0.54422	-1.0685	-0.0955822	0.995172	2.18361	1.12672	0.610258	0.263202	0.155567	0.155177	0.113366	0.038259	0	0.161082	0.0321102	0.193297	0.188502	0.119278	0.100013
si:ch73-236c18.6	1	58461990..58466807	ENSDARG00000104415	-1.95962	-0.970576	0.487442	1.55741	0.639147	0.882152	3.05193	1.60972	0.104906	0.742264	0.380994	0.368523	0.437494	0.44294	0.0607492	0.215182	0.0571926	1.03286	0.302174	0.424902	1.09851
si:ch73-236c18.7	1	58470287..58475718	ENSDARG00000098706	-1.09241	-0.127509	0.957005	1.62437	0.699882	0.850175	1.77447	0.827391	0.524465	0.561989	0.365384	0.618493	0.322746	0.130705	0.466082	0.378337	0.329097	0.792437	0.128797	0.950818	0.968082
si:ch73-236c18.8_1	1	complement(58491504..58505626)	ENSDARG00000104626	-1.6901	-0.75711	0.601739	-3.45358	-1.78809	0.0888407	-2.04342	-1.03098	0.435799	1.94884	14.3505	6.57478	4.80326	0.566568	7.53413	5.2678	1.03027	1.62207	0.651346	2.15889	3.70266
si:ch73-236c18.9_1	1	58508790..58526999	ENSDARG00000099421	-1.02648	-0.0377113	0.973071	-2.54398	-1.34709	0.138414	-2.47835	-1.30938	0.0904438	2.52585	6.03658	5.115	3.45299	1.48459	6.36122	2.67162	3.09489	2.27438	0.377527	0.846058	3.29665
zgc:172091	1	58535306..58537356	ENSDARG00000103058	#N/A	#N/A	#N/A	#N/A	#N/A	#N/A	#N/A	#N/A	#N/A	0	0	0	0	0	0	0	0	0	0	0	0
slc27a1b_2	1	complement(58544659..58562129)	ENSDARG00000104949	-1.0632	-0.0884164	0.955185	-1.42336	-0.509298	0.838811	-1.33875	-0.420881	0.695106	16.6302	9.42546	8.41688	2.38765	6.98719	7.3507	5.22835	6.55905	10.6741	5.48204	2.20245	5.74213
adgre5b.3_1	1	complement(58563957..58573646)	ENSDARG00000089904	-1.02802	-0.0398707	0.969314	-1.08028	-0.111409	0.986036	-1.05084	-0.0715382	0.977931	2.58659	1.69699	2.56198	1.24778	1.08284	1.16643	2.04209	1.70402	2.18834	0.755814	1.64107	2.39819
adgre5b.2	1	complement(58580412..58592866)	ENSDARG00000104083	1.43016	0.516179	0.648498	2.12757	1.0892	0.257057	1.48764	0.573024	0.603707	1.70492	0.916096	1.27932	0.623078	0.585774	1.12474	1.47028	1.66398	2.36761	0.976837	3.09056	2.43432
si:ch73-236c18.8_2	1	complement(58593247..58601636)	ENSDARG00000093157	1.3732	0.457542	0.359656	1.15211	0.204281	0.93592	-1.1919	-0.253262	0.716858	4.31229	3.82322	3.71057	3.27971	3.86266	4.16841	4.35105	3.83906	4.6563	3.67272	3.34512	4.57629
si:ch73-221f6.1	1	58601680..58606490	ENSDARG00000104904	-1.08432	-0.116785	0.929262	1.0497	0.0699755	0.995172	1.13821	0.186761	0.880368	1.96634	1.64371	2.11988	2.08106	0.832984	1.70358	1.2378	1.72721	1.78242	1.88306	1.78222	2.1775
si:ch73-236c18.9_2	1	58608978..58613487	ENSDARG00000096528	1.1951	0.257134	0.797268	1.08019	0.111283	0.982781	-1.10638	-0.145851	0.907803	2.78016	2.71133	3.60605	2.68232	3.39464	3.54502	2.04178	2.03505	3.23415	1.86369	3.72935	3.08474
si:ch73-221f6.3	1	58613972..58618868	ENSDARG00000104807	1.49215	0.577392	0.507576	1.10555	0.144762	0.97732	-1.34969	-0.432631	0.684895	3.81898	1.45108	3.08788	1.8329	2.04604	3.98734	2.85479	2.67565	3.6541	2.2975	1.28566	3.10962
zgc:174890	1	58620953..58622498	ENSDARG00000105176	1.02839	0.0403847	0.974174	-1.04501	-0.0635133	0.995172	-1.07467	-0.103898	0.97508	1.81649	1.61048	2.61791	1.73866	0.880152	1.88312	1.66757	1.62514	2.49021	1.04076	1.28054	1.99403
si:ch73-221f6.4	1	58628165..58632064	ENSDARG00000104783	1.02139	0.0305356	0.97177	1.05865	0.082225	0.991841	1.03648	0.0516894	0.982173	2.83046	2.86794	2.19324	3.13492	1.83383	2.82949	3.11809	1.30232	2.49445	2.71059	2.71203	3.13441
adgre5b.3_2	1	complement(58639497..58664854)	ENSDARG00000112943	-1.07463	-0.103838	0.94961	-1.01139	-0.0163434	0.995172	1.06252	0.0874949	0.973279	4.2003	1.37197	2.99774	3.09459	1.01224	1.16021	2.94268	2.95321	1.99695	2.08991	2.70497	3.69611
LO017784.1	1	58677434..58681545	ENSDARG00000105295	-1.00992	-0.0142463	0.985256	-1.04973	-0.0700168	0.992364	-1.03941	-0.0557705	0.979185	3.24337	4.75342	5.77566	3.99138	3.52149	4.01422	3.88893	2.51947	3.61667	3.75451	3.71959	4.72851
CABZ01084617.1	1	58735326..58744037	ENSDARG00000112310	#N/A	#N/A	#N/A	#N/A	#N/A	#N/A	#N/A	#N/A	#N/A	0	0	0	0	0	0	0	0	0	0	0	0
CABZ01096573.1	1	complement(58762742..58766424)	ENSDARG00000111704	-2.5944	-1.3754	0.842511	-3.0085	-1.58904	0.93592	-1.15961	-0.213643	0.982173	0	0	0	0.12148	0	0	0	0	0	0	0	0
tmed1b	1	58840889..58850686	ENSDARG00000017255	1.00485	0.00697649	0.992206	-1.10425	-0.143067	0.963367	-1.1096	-0.150043	0.878031	11.2839	6.77046	8.87026	7.46208	6.46148	7.79849	7.01046	5.50645	7.83491	6.95489	6.19835	7.79581
dnm2b	1	complement(58857088..58868306)	ENSDARG00000103054	-1.33404	-0.415806	0.640521	-1.499	-0.583999	0.697188	-1.12365	-0.168193	0.887603	10.5487	4.06623	10.2753	4.8201	3.36006	3.35201	4.88404	5.0358	5.33535	3.54751	3.49183	5.71626
CABZ01084501.2	1	complement(58870054..58880613)	ENSDARG00000113332	-1.21632	-0.282523	0.842511	-1.21514	-0.281117	0.946912	1.00098	0.00140602	0.999292	2.34015	0.599369	1.77827	1.07514	0.362842	0.970392	0.811575	1.33231	1.19157	1.34079	0.989811	0.711376
CABZ01084501.1	1	complement(58885602..58887610)	ENSDARG00000111491	#N/A	#N/A	#N/A	#N/A	#N/A	#N/A	#N/A	#N/A	#N/A	0	0	0	0	0	0	0	0	0	0	0	0
CABZ01084501.3	1	complement(58898124..58900933)	ENSDARG00000116066	1.12658	0.171951	0.969314	-3.00858	-1.58908	0.93592	-3.38941	-1.76103	0.821071	0	0.040804	0	0	0	0.0357839	0	0	0	0	0	0
zgc:171687	1	complement(58912051..58913813)	ENSDARG00000038682	-1.24329	-0.314166	0.903773	1.42511	0.511072	0.93592	1.77183	0.825238	0.699096	0.170314	0.150998	0.30124	0.293431	0.148541	0.132421	0.156351	0.124668	0.225144	0.219559	0.23155	0.517735
trip10b	1	58922027..58935898	ENSDARG00000100788	-1.98528	-0.989343	0.146085	-1.58331	-0.662946	0.680501	1.25388	0.326397	0.798858	9.18382	7.31294	4.41186	6.73925	2.2991	4.42976	2.65416	1.68062	7.41911	3.94641	2.0039	3.23122
CABZ01115881.1	1	complement(58949548..58963395)	ENSDARG00000086539	-1.5043	-0.589093	0.393939	-1.48916	-0.574503	0.656902	1.01016	0.0145903	0.988432	7.28922	5.09645	4.47225	5.92186	1.60226	3.91652	3.42741	2.86302	5.06599	3.4124	2.41708	3.46787
CABZ01114581.1	1	complement(58967210..58975098)	ENSDARG00000112526	-2.39844	-1.2621	0.529808	1.11906	0.162287	0.992364	2.684	1.42438	0.460897	2.26437	0.250945	2.67004	0.487654	0.987447	0.220071	0.519681	0	1.24722	1.45955	1.02617	1.72085
eri2	1	58977262..58979451	ENSDARG00000104392	-4.11242	-2.03999	0.119731	-1.01069	-0.0153387	0.995172	4.06893	2.02465	0.111495	0.596101	0.83049	0.30124	0.880292	0.0742707	0.198632	0.156351	0.0623342	0.825526	0.512305	0.23155	0.906037
thumpd1	1	58981985..58985885	ENSDARG00000100264	1.26025	0.333711	0.596727	-1.01611	-0.0230587	0.995172	-1.28056	-0.35677	0.582599	7.45706	10.3014	11.5536	8.66466	8.62126	12.0004	9.63172	7.67998	11.386	7.97375	7.7019	8.30302
CABZ01083166.1	1	58990121..59000239	ENSDARG00000099619	1.06257	0.0875523	0.963077	-1.45406	-0.540082	0.854796	-1.54503	-0.627634	0.539011	1.54442	0.720662	1.38979	0.805254	0.638043	1.0744	1.04469	0.832999	0.859625	0.384223	0.699902	0.833952
cdc37	1	59007536..59014053	ENSDARG00000099301	-1.03205	-0.0455079	0.967135	1.02282	0.032549	0.995172	1.0556	0.0780569	0.932299	34.4153	30.3196	27.3953	26.2799	20.1683	28.1088	23.7202	18.3574	33.7741	30.8837	25.092	22.9369
EARS2	1	complement(59015237..59021796)	ENSDARG00000103099	-1.02342	-0.0333966	0.969314	-1.11203	-0.153194	0.961722	-1.08658	-0.119797	0.916856	6.20956	4.84202	6.52806	4.96247	4.37174	5.75869	3.22797	3.5596	4.94494	4.6294	4.47537	4.71908
pin1	1	59062603..59065948	ENSDARG00000101915	1.21521	0.281204	0.678796	-1.05034	-0.0708576	0.987729	-1.27638	-0.352062	0.596945	46.0798	61.8479	38.8647	39.9705	42.5612	57.9708	40.3924	39.9372	48.6468	45.1026	31.9039	42.8013
CABZ01080042.1	1	complement(59064686..59065217)	ENSDARG00000110574	1.59632	0.674751	0.68761	1.05948	0.0833508	0.995172	-1.50671	-0.5914	0.766258	4.46126	2.32664	1.54721	1.80852	3.66206	3.46867	1.68638	3.45769	1.38764	4.96182	0	3.19099
si:ch1073-110a20.7_1	1	59067978..59072128	ENSDARG00000090557	2.6666	1.415	0.604028	3.08891	1.6271	0.788403	1.15837	0.212095	0.964122	0.0808704	0.0716985	0.0953585	0	0.211596	0.0628775	0.0742401	0.177589	0.0712699	0.0695022	0.146596	0.430213
zgc:173915_1	1	59073203..59074515	ENSDARG00000089667	1.40835	0.494006	0.804871	1.90746	0.931649	0.833393	1.35439	0.437643	0.850232	1.7887	1.09788	1.78466	0.355581	1.44003	0.855832	0.378934	2.41718	3.03145	0.709502	0.374125	5.12372
zgc:173915_2	1	59073203..59089598	ENSDARG00000088745	1.00448	0.00645431	0.995678	2.02923	1.02094	0.388697	2.02018	1.01448	0.225986	7.65066	2.17403	7.17077	3.0418	7.7847	2.36413	3.24157	1.86674	16.6832	8.85121	7.73439	3.65255
si:zfos-2330d3.1	1	complement(59075795..59104145)	ENSDARG00000038683	-2.07785	-1.05509	0.033475	1.812	0.857579	0.172713	3.76506	1.91267	3.09256e-07	12.3939	15.2223	7.91051	6.31781	6.44603	4.15515	3.49685	2.03917	25.4527	12.5084	12.9854	22.3378
mfap4	1	59090583..59092056	ENSDARG00000090783	1.23778	0.307751	0.798642	2.59165	1.37387	0.0397189	2.09379	1.06612	0.12364	5.78891	4.39917	3.413	4.80869	5.49965	2.33084	3.41634	5.9778	9.01906	6.04126	6.65227	24.1181
MFAP4	1	complement(59094416..59096190)	ENSDARG00000038681	-1.85668	-0.892722	0.256751	1.64893	0.721532	0.658215	3.06153	1.61425	0.00422627	30.2931	39.3767	12.9504	7.69354	17.2628	9.47758	8.642	3.79878	60.5201	24.3752	18.8149	42.008
si:zfos-2330d3.7_1	1	complement(59101838..59104160)	ENSDARG00000095746	2.37938	1.25059	0.593824	-1.22837	-0.296745	0.986239	-2.92276	-1.54733	0.501782	0.15893	0.140905	0.562207	0.273816	0.831673	0.370708	0	0.814345	0	0.546354	0	0.241564
zmp:0000001323	1	complement(59107633..59116738)	ENSDARG00000094845	3.08952	1.62738	0.143747	1.97154	0.979323	0.789484	-1.56706	-0.648057	0.707988	0.645383	1.02994	0.913205	1.00072	2.13893	1.50537	0.355482	4.34621	1.36504	0.55466	1.75485	3.23711
FO203432.1	1	complement(59123750..59124505)	ENSDARG00000115195	1.82627	0.868903	0.457112	1.59868	0.676882	0.854796	-1.14236	-0.19202	0.923466	2.98516	2.49091	1.65645	3.93292	4.44132	3.95933	2.74041	4.62728	3.09503	8.60206	2.06902	2.26863
si:ch1073-110a20.7_2	1	complement(59125767..59126139)	ENSDARG00000109399	3.91548	1.96919	0.353199	2.02684	1.01923	0.918343	-1.93182	-0.949957	0.695106	0	0.347844	0	0.675956	0.684369	0.610098	0.72035	1.72314	0.69153	0.674378	0.711208	0.298168
si:zfos-2330d3.7_2	1	complement(59128019..59130695)	ENSDARG00000093877	1.04988	0.0702311	0.969314	-1.63356	-0.708018	0.872221	-1.71505	-0.778249	0.629654	1.8174	1.04259	1.5127	0.920929	1.02563	0.748084	0.883271	1.48683	0.282644	1.56193	0.193791	0.812453
si:ch1073-110a20.2	1	complement(59132757..59139848)	ENSDARG00000092806	1.7314	0.791942	0.642436	1.0881	0.121818	0.995172	-1.59121	-0.670124	0.726486	0.199686	0.354077	0.156973	0.401372	0.348316	0.362267	0.305524	0.535949	0.17598	0.514846	0.120658	0.354095
si:ch1073-110a20.3	1	complement(59136015..59139599)	ENSDARG00000096586	-1.19362	-0.255346	0.932321	-1.40128	-0.486747	0.951766	-1.17397	-0.231401	0.957202	0.272035	1.20591	0.160386	0.351512	0.711775	0	0.249732	0.398254	0.479482	0.350692	0.369844	0.206739
si:ch1073-110a20.1	1	complement(59140583..59141838)	ENSDARG00000094408	1.08049	0.111692	0.969314	1.36069	0.444335	0.93592	1.25932	0.332643	0.877904	2.22465	1.47925	0.655799	1.19775	0.606327	1.29726	0.638205	1.93375	0.735206	3.46536	0.252042	2.32466
gpr108	1	59142783..59151058	ENSDARG00000096651	-1.09699	-0.133547	0.841333	-1.12618	-0.171439	0.93592	-1.02661	-0.0378925	0.978561	19.3345	19.1942	18.8048	18.2066	14.2455	16.1661	13.066	10.8263	18.6261	13.706	14.6488	16.1598
soul5l	1	59154521..59158077	ENSDARG00000089879	1.1266	0.171979	0.969314	2.88704	1.52959	0.901403	2.56261	1.35761	0.750849	0	0	0.171365	0	0.126751	0	0	0	0.128077	0	0.131721	0.220892
wu:fk65c09	1	complement(59163060..59169815)	ENSDARG00000069046	-1.33058	-0.412052	0.688822	-1.60928	-0.686419	0.667979	-1.20946	-0.274367	0.833964	116.851	88.505	177.421	129.99	130.85	86.9663	30.0598	53.505	64.2902	84.2375	107.42	30.7756
CAMSAP3	1	complement(59172744..59176949)	ENSDARG00000091359	-1.17497	-0.232626	0.931932	-1.20088	-0.264096	0.981079	-1.02205	-0.0314703	0.989465	0.234245	0.0692261	0.138105	0.235419	0.0680998	0.182128	0.0358401	0.142888	0.240843	0	0.0707705	0.207689
lpar2b	1	complement(59192197..59216197)	ENSDARG00000042561	-1.68158	-0.749815	0.175121	-1.15388	-0.206489	0.93592	1.45733	0.543326	0.426853	9.85115	5.25214	6.27892	6.88067	2.26405	4.65772	3.8496	2.33869	7.86044	4.69082	4.70568	5.56435
akap8l	1	complement(59218067..59237167)	ENSDARG00000099635	-1.03116	-0.0442695	0.969314	1.05962	0.0835494	0.984375	1.09264	0.127819	0.894878	57.0177	47.5091	45.6348	43.7709	31.8175	49.3535	34.741	31.8009	52.8726	53.9896	37.1356	46.4378
mvb12a	1	complement(59237328..59243542)	ENSDARG00000099741	-1.01054	-0.0151238	0.981171	1.07969	0.110621	0.971445	1.09107	0.125745	0.887084	12.2322	8.76683	8.98238	9.21224	7.92148	10.3649	7.26208	4.98628	13.2976	7.36518	8.09936	11.0217
olfm2b	1	complement(59244159..59251874)	ENSDARG00000102825	-1.33881	-0.420953	0.797268	-1.68482	-0.752593	0.844879	-1.25844	-0.33164	0.86417	0.904026	1.64752	0.592213	1.08161	0.525637	1.05433	0.968227	0.11029	1.10654	0.388473	0.728335	0.229011
si:ch1073-286c18.5	1	complement(59252435..59252973)	ENSDARG00000098567	3.72802	1.89841	0.243425	1.02404	0.0342729	0.995172	-3.6405	-1.86414	0.249237	0	2.73758	0	0	2.11596	1.71484	2.42968	2.74456	0.77749	0	0.599711	1.67616
col5a3b	1	complement(59252435..59287507)	ENSDARG00000101816	-1.52397	-0.607831	0.373666	-2.12117	-1.08486	0.044096	-1.39187	-0.477027	0.565725	12.9907	5.79571	7.60975	5.52337	1.96726	5.92707	6.34628	2.18617	4.39903	4.50531	1.70368	2.96811
rdh8b	1	59293873..59303460	ENSDARG00000105060	1.25928	0.332598	0.920904	-1.25502	-0.327716	0.982781	-1.58043	-0.660314	0.854253	0.113869	0.0504774	0.134269	0.0490456	0	0.177069	0.1568	0	0.100351	0.0489312	0.103207	0
txndc11	1	complement(59304096..59313486)	ENSDARG00000101291	-1.07933	-0.110135	0.909933	-1.25663	-0.329556	0.897962	-1.16427	-0.219421	0.825184	4.18409	4.62067	4.11139	3.7308	3.6492	4.25195	2.62809	1.80001	4.5607	2.555	2.69453	2.78928
parn	1	59314675..59324539	ENSDARG00000102634	-1.00287	-0.00413301	0.993514	-1.13082	-0.177366	0.93592	-1.12758	-0.173233	0.798347	12.9888	11.924	14.5011	12.1016	10.6454	12.3908	9.85199	7.48475	12.5834	8.74823	10.7289	10.6062
CABZ01052576.1	1	59328030..59335940	ENSDARG00000102091	1.67983	0.748317	0.202508	-1.04358	-0.0615441	0.995172	-1.75304	-0.809861	0.141195	2.73286	2.82673	4.09521	2.7956	3.82352	5.44486	3.92001	3.20902	3.16107	3.42518	1.70291	2.76919
cyp3a65	1	complement(59338175..59348118)	ENSDARG00000103295	-1.63582	-0.710014	0.843027	-1.35862	-0.442141	0.976982	1.20403	0.267873	0.974521	0.0588512	0.0521766	0	0.101393	0	0.0915147	0	0	0.0518648	0.0505784	0.0533406	0
CABZ01052573.1	1	complement(59353230..59360114)	ENSDARG00000100739	-1.47244	-0.558205	0.531756	-1.50316	-0.587996	0.772464	-1.02086	-0.0297908	0.982173	7.77684	7.28969	3.7973	4.48585	1.91229	5.70029	2.76764	2.28204	7.51785	3.29765	1.39731	2.75981
si:ch211-188p14.4	1	complement(59406243..59415948)	ENSDARG00000100190	-1.5523	-0.634403	0.148447	-1.66631	-0.73666	0.111727	-1.07345	-0.102256	0.91339	34.8349	18.4189	30.3119	26.3475	12.8115	19.987	14.4002	8.44841	22.9784	11.1817	11.8875	15.8283
si:ch211-188p14.5	1	complement(59406300..59407322)	ENSDARG00000099024	-1.13205	-0.17894	0.842511	-1.61178	-0.688656	0.41352	-1.42377	-0.509716	0.48731	18.6478	15.3273	21.0723	20.7492	14.7391	16.1601	11.056	10.5219	13.0103	12.3537	5.80994	12.6955
si:ch211-188p14.3	1	complement(59416186..59417949)	ENSDARG00000099538	-2.60081	-1.37896	0.146597	-1.80424	-0.851391	0.716928	1.4415	0.527568	0.765183	10.8072	2.90349	10.0402	3.66748	1.71375	2.29165	2.40513	1.43832	4.61782	1.68873	3.85874	3.48437
si:ch211-188p14.2	1	complement(59419086..59422880)	ENSDARG00000098620	-2.10032	-1.07061	0.138362	-2.03228	-1.0231	0.276122	1.03348	0.0475093	0.982173	18.6591	3.92253	17.6922	9.61104	5.20088	3.88864	6.00408	2.95694	7.12007	4.29834	3.83569	7.01707
sp6	1	59533317..59539898	ENSDARG00000099880	-1.52317	-0.607074	0.591332	-1.05182	-0.072886	0.995172	1.44813	0.534188	0.684472	3.96604	2.34415	2.0385	3.5041	1.50778	2.68829	0.933559	0.967701	3.8537	2.70934	1.10605	2.93679
zmp:0000001082	1	complement(59555936..59567685)	ENSDARG00000098899	1.09572	0.131883	0.893174	1.00463	0.00665833	0.995662	-1.09068	-0.125225	0.913162	4.99993	1.89094	4.37022	2.95174	3.20194	2.5826	3.72336	2.40581	3.66684	3.69609	2.82046	2.71034
wfikkn1	1	complement(59569516..59571785)	ENSDARG00000101364	3.57803	1.83916	0.797926	5.11308	2.35419	0.90247	1.42902	0.515028	0.935841	0	0	0	0	0	0	0	0.0383342	0	0.0900161	0	0
CABZ01092282.1	2	complement(18866..22535)	ENSDARG00000100145	-1.08878	-0.122716	0.969314	-1.12681	-0.17225	0.990175	-1.03493	-0.0495339	0.982173	0.9665	0.428442	0.341895	0.083258	0.168589	0.450877	0.266178	0.353734	0.255529	0.415318	0.3504	0.440706
zgc:153913	2	complement(63298..66646)	ENSDARG00000063518	-1.46602	-0.551902	0.850467	-3.21235	-1.68363	0.806012	-2.19121	-1.13173	0.764225	0.263124	0.0933128	0.124105	0.045333	0.183589	0	0.0483103	0.0385209	0	0	0	0.11998
cldn1	2	68789..71801	ENSDARG00000040045	-1.41609	-0.501913	0.370246	-1.74667	-0.804606	0.103202	-1.23344	-0.302693	0.695106	58.4068	46.288	39.4178	51.4463	16.2157	41.6153	26.3781	24.4697	31.9431	24.3719	16.8516	32.2558
angptl1b	2	complement(97692..103388)	ENSDARG00000100159	1.2346	0.304044	0.797268	1.16836	0.22449	0.951828	-1.05669	-0.0795536	0.97481	2.79866	1.74815	1.50002	1.64378	1.27591	2.22544	1.57656	2.18827	2.18615	2.84256	1.7295	1.4985
TADA1	2	105748..109352	ENSDARG00000100031	1.42808	0.514074	0.603102	1.21711	0.283464	0.93592	-1.17333	-0.23061	0.86417	3.2876	5.12993	3.41139	3.28519	5.61993	4.29431	3.13878	4.0429	4.05624	6.21599	3.93328	2.99817
fggy	2	111919..115367	ENSDARG00000038667	-1.66646	-0.73679	0.357743	-1.249	-0.320776	0.93592	1.33424	0.416014	0.714115	2.50344	2.57943	3.27106	2.85598	1.06219	1.5782	1.4286	1.18864	1.60996	3.08191	1.77843	1.7997
znfl2a	2	complement(118225..122164)	ENSDARG00000008333	2.36195	1.23998	0.686261	2.04068	1.02905	0.935742	-1.15743	-0.210926	0.974222	0	0.18314	0	0.0889724	0.450399	0.080304	0	0.0756026	0.182045	0.266294	0.0936125	0.0784924
igfbp1b	2	complement(124433..127945)	ENSDARG00000038666	-1.43382	-0.519868	0.887613	-1.66335	-0.734095	0.938227	-1.16008	-0.214227	0.98091	0.0915161	0.0811369	0.107911	0.157671	0	0.213464	0	0	0.0806519	0	0.165894	0
adcy1b	2	complement(136346..155270)	ENSDARG00000088634	-2.10394	-1.07309	0.800546	-7.13147	-2.8342	0.85958	-3.38958	-1.76111	0.822222	0	0.0830223	0.0552095	0	0	0	0	0.0342728	0	0	0	0
zgc:113518	2	complement(176711..184051)	ENSDARG00000015482	-1.09112	-0.125808	0.906994	1.11721	0.159906	0.963155	1.21901	0.285714	0.778861	5.6753	2.83699	4.05794	5.25299	1.94832	4.27177	4.21235	2.38649	5.16119	3.1133	4.70611	5.5978
znf1014	2	complement(184818..193707)	ENSDARG00000101562	-1.32485	-0.405832	0.611049	1.06735	0.0940314	0.98442	1.41408	0.499864	0.510877	3.09892	1.62734	2.05192	2.38204	0.91478	1.68661	1.70691	1.08184	2.83608	1.27019	2.16058	2.89857
CABZ01064859.1	2	complement(194742..197665)	ENSDARG00000099331	-1.21948	-0.286261	0.764116	1.05356	0.075274	0.991841	1.28479	0.361535	0.703901	4.00932	2.70827	3.07669	3.17967	1.60962	2.47403	1.98636	2.14286	3.25293	3.50041	3.05709	2.9986
CABZ01064859.2	2	complement(198565..206156)	ENSDARG00000101134	-1.25454	-0.327163	0.765076	1.23368	0.302964	0.93592	1.5477	0.630127	0.475271	0.850315	0.753876	1.29374	0.945153	0.334921	0.490514	0.881323	0.662578	0.966929	0.825078	1.26792	1.33412
zgc:113293	2	205763..211064	ENSDARG00000038271	1.22408	0.291702	0.969314	3.08399	1.6248	0.93592	2.51943	1.3331	0.86417	0	0	0	0	0	0	0	0	0	0	0	0.05878
dhx30	2	212059..232977	ENSDARG00000077839	1.09836	0.13535	0.919903	-1.47605	-0.561742	0.830738	-1.62123	-0.697092	0.450054	1.9577	0.807982	4.93525	2.52965	1.3836	2.44065	3.37748	1.60597	1.39808	1.42142	1.86616	1.6417
CABZ01085887.1	2	243778..250511	ENSDARG00000110206	3.57804	1.83917	0.797268	3.08424	1.62491	0.93592	-1.1601	-0.214255	0.982173	0	0	0	0	0.290426	0	0	0	0	0	0.301815	0
phlpp1	2	258698..283376	ENSDARG00000078694	-1.05034	-0.0708547	0.935199	-1.22014	-0.287048	0.870801	-1.16166	-0.216193	0.773971	6.16498	4.75862	5.408	5.35369	4.57975	5.14217	3.40183	3.08956	6.51681	2.69916	3.35865	4.35686
MEP1B	2	complement(283764..293793)	ENSDARG00000040683	1.72632	0.787703	0.835524	1.48783	0.573206	0.968644	-1.1603	-0.214497	0.976879	0.0829295	0	0	0.0357193	0	0.0322392	0.0380652	0.0910554	0	0.106908	0	0.0630239
si:ch73-40a17.4	2	295899..299908	ENSDARG00000097928	1.33773	0.419782	0.797268	1.26648	0.340823	0.938134	-1.05626	-0.0789596	0.982173	0.687562	0.670541	0.729666	0.414604	0.299832	0.74842	0.883668	0.654275	0.424157	0.650001	1.18404	0.679284
znf1008	2	301898..306761	ENSDARG00000089940	1.718	0.780733	0.260771	1.02606	0.0371157	0.995172	-1.67437	-0.743617	0.294668	1.41418	1.33215	1.19854	1.29437	1.73446	1.71803	1.50109	2.03798	0.817882	1.13942	1.44198	1.6121
zgc:113452	2	307665..316739	ENSDARG00000074146	-1.36058	-0.444217	0.642698	1.26309	0.336959	0.918343	1.71853	0.781176	0.271684	2.93405	1.61459	1.55089	2.17888	0.8824	1.06196	1.20743	1.55523	2.63032	2.08684	2.38421	2.72957
zgc:174263	2	327081..334415	ENSDARG00000097244	1.08386	0.116175	0.901117	-1.02649	-0.0377212	0.995172	-1.11257	-0.153896	0.871479	3.74381	3.03058	3.00699	3.31854	1.41965	3.60692	3.31234	2.78015	4.11225	1.70203	2.68018	3.66987
sharpin	2	complement(354424..364839)	ENSDARG00000076995	-1.26234	-0.3361	0.599241	1.19684	0.259231	0.901892	1.51082	0.595331	0.201286	4.87094	3.58181	4.05429	4.0726	1.54936	2.82926	3.60357	2.30707	4.92396	4.38321	3.89545	5.26957
si:dkey-33c14.6	2	366429..369659	ENSDARG00000087839	1.03413	0.0484189	0.975606	1.06454	0.0902352	0.995172	1.02941	0.0418163	0.983817	0.279453	0.148656	0.593132	0.192585	0.341219	0.086911	0.205234	0.28638	0.34479	0.192136	0.405258	0.212376
si:dkey-33c14.7	2	371759..372409	ENSDARG00000097391	1.8888	0.917467	0.609785	1.97671	0.983105	0.829718	1.04655	0.0656377	0.982173	0.291371	1.29163	0.687142	1.25499	0.508245	1.35926	1.06993	2.34609	2.56781	2.0033	1.05635	1.3286
wrnip1	2	complement(374365..389867)	ENSDARG00000005218	1.09851	0.135542	0.906372	1.77244	0.825741	0.312957	1.61351	0.690198	0.313441	3.30508	2.93023	2.37485	2.49123	1.93672	2.97125	2.51262	2.15467	4.64214	6.61298	2.62115	4.27784
mylk4a	2	394166..424925	ENSDARG00000091260	1.25306	0.325457	0.645887	-1.25344	-0.325891	0.872221	-1.57063	-0.651347	0.189041	34.1756	28.0571	29.6168	33.4939	35.0395	19.6659	37.0437	30.0109	17.3661	14.6099	31.0289	30.2639
foxc1a	2	complement(686873..689047)	ENSDARG00000091481	1.68394	0.751837	0.239708	-1.05986	-0.0838757	0.990746	-1.78474	-0.835712	0.160394	2.89683	2.18062	2.19127	2.30711	3.38456	2.76227	2.70951	3.60077	2.79378	2.11383	1.83295	1.74459
ftr93	2	complement(696244..707152)	ENSDARG00000039852	1.24401	0.315004	0.733531	1.10448	0.143373	0.971864	-1.12633	-0.171631	0.877736	2.83324	1.47962	2.1967	1.97259	1.92944	2.59516	2.1734	1.50571	2.90734	2.36825	1.93475	1.44528
foxf2a	2	complement(713080..716426)	ENSDARG00000017195	-1.41671	-0.502545	0.858561	1.48981	0.575128	0.93592	2.11063	1.07767	0.67092	0.0547075	0.242514	0.0645085	0.0471271	0.0477137	0.0850712	0.0502223	0.0400454	0.241065	0.0470172	0.148755	0.166304
foxq1a	2	complement(720779..722170)	ENSDARG00000030896	-2.17307	-1.11973	0.0268775	-2.35077	-1.23314	0.0125216	-1.08178	-0.113401	0.935325	57.0485	51.7898	33.433	59.8847	7.89532	39.7741	13.1712	14.0655	23.7833	22.019	14.5522	20.2497
CU861459.1	2	complement(731491..732864)	ENSDARG00000098888	1.1266	0.171979	0.969314	-3.00868	-1.58913	0.93592	-3.38959	-1.76111	0.821071	0	0	0.102021	0	0.0754599	0	0	0	0	0	0	0
irf4a	2	complement(854444..879800)	ENSDARG00000006560	-1.13341	-0.180668	0.924845	1.5214	0.605402	0.884496	1.72437	0.78607	0.564556	0.946377	0.580876	0.858401	1.06609	0.952376	0.283006	0.735127	0.426301	0.577404	0.813342	1.12169	2.37895
dusp22b	2	complement(881954..898899)	ENSDARG00000039850	-1.25221	-0.324472	0.771913	1.22749	0.295716	0.93592	1.53708	0.620189	0.495295	3.5415	7.55259	5.07887	6.51383	3.84007	5.95362	2.10885	2.80253	7.42309	8.22611	4.25093	6.76495
ripk1l	2	904362..920580	ENSDARG00000006677	-1.59561	-0.674104	0.592818	-1.36553	-0.449457	0.933454	1.16849	0.224647	0.903384	4.06379	0.528425	3.45012	1.44696	0.425313	0.589799	2.3876	1.03121	1.76681	1.11761	1.32598	2.01773
AL935300.3	2	927204..931637	ENSDARG00000098661	-1.33607	-0.417997	0.890655	1.61955	0.695593	0.93592	2.16383	1.11359	0.658112	0.681648	0.120868	0.321507	0.11744	0	0.105998	0.125153	0.399168	0.360436	0.117165	0.494257	0.828851
si:ch211-241e1.5	2	935952..942319	ENSDARG00000008906	-1.34572	-0.428382	0.635498	1.05514	0.0774361	0.992364	1.41993	0.505818	0.567606	4.48724	3.11347	3.91084	3.19322	1.53141	1.82028	2.32833	2.66578	4.64229	2.23563	3.30081	4.29978
si:ch211-241e1.3	2	complement(944341..985417)	ENSDARG00000022615	-1.44659	-0.532652	0.246163	-1.78221	-0.833665	0.0305179	-1.23201	-0.301014	0.653475	23.8025	20.1577	29.5754	22.4561	13.5066	15.9783	9.98347	12.2724	13.7888	8.68201	13.3839	14.8076
cacna1eb	2	1001560..1117886	ENSDARG00000095614	-1.26795	-0.342499	0.931313	-1.03228	-0.0458284	0.995172	1.22831	0.296671	0.957324	0.0483381	0.0428558	0.0189993	0	0	0.0375833	0.0295834	0	0.0141999	0.0692385	0	0.0122452
polr2d	2	1124512..1129721	ENSDARG00000076509	1.16366	0.21867	0.75238	1.14211	0.191707	0.93592	-1.01886	-0.0269626	0.982173	26.7624	30.4327	23.5534	36.4189	26.3856	35.5847	26.1706	21.0094	36.9162	31.1672	25.4869	33.603
CABZ01084564.1	2	complement(1174778..1188707)	ENSDARG00000045137	#N/A	#N/A	#N/A	#N/A	#N/A	#N/A	#N/A	#N/A	#N/A	0	0	0	0	0	0	0	0	0	0	0	0
CABZ01084566.1	2	1202347..1217192	ENSDARG00000053746	-2.59436	-1.37538	0.842511	-3.00845	-1.58902	0.93592	-1.15961	-0.213643	0.982173	0.0874757	0	0	0	0	0	0	0	0	0	0	0
abcf3	2	complement(1218758..1227221)	ENSDARG00000089705	1.07746	0.107631	0.91761	1.01599	0.0228918	0.995172	-1.0605	-0.0847388	0.956251	4.78849	3.32249	6.46467	5.67933	5.56844	4.85621	3.50398	3.09874	5.25975	3.99607	4.90621	4.95762
ZNF521	2	complement(1264971..1279387)	ENSDARG00000116769	-1.47214	-0.557918	0.749379	1.11588	0.15818	0.988347	1.64273	0.716098	0.687743	0.51131	0.11333	0.527548	0.165173	0.250843	0.14908	0.0586737	0.187137	0.197142	0.329575	0.492397	0.267149
ss18	2	complement(1348281..1364678)	ENSDARG00000002970	-1.0157	-0.0224759	0.969314	-1.05805	-0.0814063	0.980917	-1.04169	-0.0589304	0.960566	24.4031	24.3651	20.1693	23.9196	19.9408	23.2294	17.6392	12.145	24.3702	21.7567	16.3818	19.9322
rpe65a	2	complement(1428696..1443692)	ENSDARG00000007480	3.3383	1.73911	0.683963	3.92102	1.97123	0.869916	1.17455	0.232113	0.977302	0	0	0.0733911	0	0.0542837	0	0	0.136678	0.274259	0	0	0.0473009
gpaa1	2	complement(1453034..1468258)	ENSDARG00000074571	1.13433	0.181845	0.875999	1.31581	0.395951	0.901892	1.15999	0.214107	0.86417	4.63167	2.33835	2.35145	2.99242	1.90757	2.1507	3.48422	3.10781	6.74635	1.93501	3.61492	3.03105
si:ch211-188c16.1	2	complement(1470070..1486023)	ENSDARG00000077288	1.22408	0.291702	0.969314	3.08424	1.62491	0.93592	2.51963	1.33321	0.86417	0	0	0	0	0	0	0	0	0	0	0.0399215	0
c8b	2	complement(1478225..1518360)	ENSDARG00000039517	#N/A	#N/A	#N/A	#N/A	#N/A	#N/A	#N/A	#N/A	#N/A	0	0	0	0	0	0	0	0	0	0	0	0
c8a	2	1486822..1499584	ENSDARG00000039516	-4.37192	-2.12827	0.730154	-1.04674	-0.0659074	0.995172	4.17669	2.06236	0.766258	0	0.0454297	0	0.0441411	0	0	0	0	0	0	0.0464431	0.0389417
dab1b	2	complement(1522721..1569250)	ENSDARG00000003290	1.22408	0.291702	0.969314	3.08399	1.6248	0.93592	2.51943	1.3331	0.86417	0	0	0	0	0	0	0	0	0	0	0	0.0414997
prkacbb	2	complement(1594344..1622641)	ENSDARG00000059125	1.19858	0.261325	0.667844	-1.05565	-0.0781335	0.981517	-1.26528	-0.339459	0.560976	13.6656	9.43224	9.08234	11.0716	8.05737	12.9082	9.51777	9.82121	12.7798	7.06617	8.39382	10.3339
adgrl2b.1	2	1714640..1814893	ENSDARG00000111712	-3.04768	-1.60771	0.616461	-2.37438	-1.24755	0.901892	1.28357	0.360161	0.956514	0	0.120385	0.880609	0	0.236852	0	0	0	0.0598326	0	0.0615351	0.257981
ADGRL2	2	1714734..1904551	ENSDARG00000075899	-1.19607	-0.258301	0.724771	1.05674	0.0796174	0.983638	1.26393	0.337918	0.63279	3.21478	2.6708	2.43878	2.59504	1.09799	2.39465	1.91932	1.72787	3.13032	2.76287	2.77113	2.06727
exosc4	2	1939391..1943113	ENSDARG00000103432	1.26132	0.334935	0.703426	-1.05242	-0.0737167	0.992364	-1.32744	-0.408652	0.649882	8.81715	8.08671	8.78346	6.28587	7.68997	10.4013	7.25693	5.89768	7.50248	6.7938	7.4404	6.58523
bcl10	2	1945211..1954204	ENSDARG00000077130	-1.09788	-0.134722	0.882097	1.14372	0.193737	0.93592	1.25567	0.32846	0.695106	4.65167	4.31529	3.12392	2.46797	2.52555	3.73648	2.94113	1.39807	6.08131	2.83286	2.82004	4.14383
mcoln3a	2	1958604..1986773	ENSDARG00000078363	-1.04743	-0.0668539	0.969314	1.48144	0.567004	0.876444	1.55171	0.633858	0.632071	0.582575	0.455737	0.444493	0.383769	0.358658	0.29309	0.59773	0.175592	0.845624	0.206163	0.528024	1.04174
ssx2ipa	2	1988036..2008463	ENSDARG00000039521	-1.30528	-0.384355	0.557537	-1.23721	-0.307093	0.884496	1.05501	0.0772616	0.951977	7.3707	6.45832	4.47265	4.23293	3.60894	4.28971	3.6404	2.14549	5.84992	2.96355	4.25835	4.12743
tubb2	2	complement(2010277..2020044)	ENSDARG00000039522	1.14858	0.199854	0.81579	1.16117	0.21558	0.93592	1.01096	0.0157256	0.985785	6.36338	5.64168	5.20121	6.41603	4.41468	6.35315	5.77529	4.81672	7.64721	6.58749	5.63645	6.09992
slc22a23	2	complement(2024610..2096055)	ENSDARG00000078856	-1.23067	-0.29944	0.797268	-1.39242	-0.477596	0.869916	-1.13144	-0.178157	0.896231	2.92186	0.914285	2.73598	1.62865	0.974361	0.935435	1.86709	1.2581	1.41372	0.664709	1.42799	1.89398
dspa	2	2110271..2162791	ENSDARG00000022309	-1.03616	-0.0512491	0.969314	-1.34996	-0.432921	0.820319	-1.30285	-0.381672	0.644466	79.7779	59.9951	67.8321	54.7047	73.818	52.4823	43.3889	29.2913	57.9352	22.7623	43.0378	61.2594
higd1a	2	2168547..2175629	ENSDARG00000022303	1.20805	0.272686	0.730154	-1.37143	-0.455677	0.761541	-1.65676	-0.728363	0.144257	46.6365	44.8347	45.4025	69.955	56.08	49.0528	59.202	34.9127	47.0001	30.2312	35.3789	30.2395
ccdc13	2	2181709..2207243	ENSDARG00000063451	1.43155	0.517578	0.850498	-1.06163	-0.0862822	0.995172	-1.51978	-0.60386	0.854563	0.205496	0.18219	0.0605778	0	0	0.159775	0.330134	0.0376053	0.226376	0.0883045	0.0465635	0.0390427
tmie	2	2223837..2279311	ENSDARG00000069423	1.87431	0.906358	0.52881	1.50197	0.586853	0.912023	-1.2479	-0.319505	0.86417	0.321876	0.475617	0.37954	0.462127	0.65503	0.834205	0.492477	0.47122	0.661884	0.368839	0.583473	0.733848
pth1r	2	complement(2290148..2451181)	ENSDARG00000020957	-2.02321	-1.01664	0.632759	-1.21586	-0.281977	0.977354	1.66401	0.734668	0.78385	0.224938	0.0997131	0.331544	0.242212	0	0.0437227	0.0516239	0.205815	0.148676	0.144988	0.203875	0.170946
myl13	2	2470687..2481947	ENSDARG00000042245	1.28927	0.36655	0.652355	1.09576	0.131932	0.97233	-1.17659	-0.234617	0.821071	972.331	1530.45	1680.17	1045.71	1110.75	1010.78	1824.89	1383.07	1195.62	1307.49	1535.27	1341.66
crhr2	2	2503396..2511944	ENSDARG00000103704	#N/A	#N/A	#N/A	#N/A	#N/A	#N/A	#N/A	#N/A	#N/A	0	0	0	0	0	0	0	0	0	0	0	0
CRHR2	2	2563192..2608112	ENSDARG00000062377	-2.59447	-1.37544	0.842511	-1.02979	-0.0423441	0.995172	2.51943	1.3331	0.86417	0	0.104872	0	0	0	0	0	0	0	0	0	0.0898953
CABZ01088149.1	2	complement(2621400..2623983)	ENSDARG00000114019	-1.23798	-0.307987	0.826661	-1.05663	-0.0794735	0.995172	1.17163	0.228514	0.884524	7.89605	3.24098	4.31048	3.27502	1.91295	2.50118	3.62434	3.31805	7.47414	1.88502	1.59038	5.77851
serbp1b	2	complement(2630188..2642476)	ENSDARG00000087421	-1.05285	-0.0743007	0.937825	-1.10474	-0.143711	0.955195	-1.04929	-0.06941	0.95634	58.3428	29.3579	69.4417	44.3529	28.4019	38.5391	47.1399	33.6733	41.508	32.4652	40.39	54.2381
aqp1a.1	2	2737422..2749333	ENSDARG00000023713	1.40243	0.487924	0.386459	1.12182	0.165838	0.939205	-1.25014	-0.322086	0.664524	11.9294	9.62159	10.3545	8.99186	10.7656	14.1704	10.8753	9.15666	6.78977	11.3204	12.3891	11.4584
aqp1a.2	2	2761882..2766520	ENSDARG00000091027	1.90871	0.932596	0.858476	5.74622	2.52261	0.757244	3.01053	1.59002	0.684895	0	0	0	0.122938	0	0	0	0.208928	0.377311	0.613255	0	0
thoc1	2	2772447..2790493	ENSDARG00000088246	1.00047	0.000679527	0.999279	-1.06247	-0.087423	0.975336	-1.06297	-0.0881025	0.914319	14.0226	13.1368	13.0537	13.4978	8.71443	13.3304	10.3713	9.7657	15.4599	10.9292	10.7028	10.5273
usp14	2	complement(2790573..2813259)	ENSDARG00000025889	1.00627	0.0090194	0.98645	1.10823	0.148252	0.93592	1.10132	0.139232	0.857823	28.0988	21.6542	29.6283	28.3482	23.3756	24.4939	21.2809	16.0193	33.2397	25.5421	24.2923	28.4997
rock1	2	2818645..2900825	ENSDARG00000058993	-1.15094	-0.202814	0.797268	-1.2024	-0.265919	0.901892	-1.04471	-0.063105	0.966604	8.36015	3.01366	7.69132	4.15485	3.28513	3.71434	4.95484	3.39601	4.2101	3.29639	4.57971	5.46328
eif2b5	2	2904080..2917148	ENSDARG00000074995	-1.0634	-0.0886906	0.910781	-1.1469	-0.197745	0.93592	-1.07852	-0.109055	0.900452	14.795	9.95286	18.5168	15.2046	8.65903	12.9664	11.4971	9.68984	10.2937	12.1576	11.8217	12.5753
CABZ01112864.1	2	2918759..2927264	ENSDARG00000099937	-1.73001	-0.790782	0.794599	1.26966	0.344443	0.975097	2.19653	1.13523	0.684895	0.249223	0	0.293872	0.143127	0	0.0645911	0.0762634	0.121619	0.0732123	0.142793	0.301182	0.252536
si:ch1073-82l19.1	2	complement(2927463..2957970)	ENSDARG00000101799	1.34451	0.427084	0.585516	1.8206	0.864415	0.171629	1.3541	0.437331	0.586503	2.46717	1.95179	5.23649	3.10622	3.37662	2.98066	2.47396	4.22313	5.41897	6.16533	5.40116	4.29801
pik3r3a	2	2957515..2988713	ENSDARG00000103038	1.05372	0.0754925	0.942922	-1.11913	-0.162378	0.94626	-1.17925	-0.23787	0.787797	10.879	13.6006	11.5735	8.60292	7.42296	11.2069	10.5856	8.1894	14.8803	9.02526	5.35008	9.02405
guk1a	2	complement(3026802..3045863)	ENSDARG00000030340	-1.16405	-0.219157	0.758288	-1.24127	-0.311821	0.869916	-1.06634	-0.0926639	0.927333	24.7762	21.6161	15.364	19.7842	13.0284	20.1847	14.8008	8.06843	20.443	10.0952	11.8991	20.3795
C2H1orf35	2	3044992..3062793	ENSDARG00000004525	1.09701	0.133573	0.890796	-1.16669	-0.222426	0.93592	-1.27987	-0.355999	0.685004	6.77767	5.89839	6.91324	5.73108	3.19133	8.341	6.4892	4.07852	7.14569	3.68077	2.52505	7.45763
arf1	2	complement(3062737..3077027)	ENSDARG00000009484	-1.05506	-0.0773225	0.941219	-1.20994	-0.274931	0.90247	-1.1468	-0.197608	0.829909	30.3676	25.5162	20.5325	21.334	23.1671	19.0195	17.5924	13.0536	24.9112	15.7676	15.7825	19.6371
wnt3a	2	complement(3106237..3158919)	ENSDARG00000058822	-2.01214	-1.00873	0.779005	-2.46203	-1.29985	0.901892	-1.22359	-0.291117	0.972736	0.866153	0	0.255331	0	0	0	0.39757	0	0.095416	0	0.0981312	0.164562
wnt9a	2	3201345..3271007	ENSDARG00000063437	1.04056	0.0573629	0.983935	1.14441	0.194601	0.995172	1.0998	0.137238	0.982173	0	0.183778	0.488847	0	0	0.080584	0.475732	0	0.0913399	0.178149	0.093939	0.315065
snap47	2	complement(3387390..3403793)	ENSDARG00000063445	-2.86341	-1.51774	0.0208827	-1.59683	-0.675215	0.750038	1.79318	0.842521	0.360735	5.43362	1.12555	5.449	2.44973	0.708634	0.829145	1.39854	0.854946	2.90895	1.13472	1.5649	2.70147
jmjd4	2	3403264..3414068	ENSDARG00000058995	1.52778	0.611433	0.475033	1.23471	0.304173	0.93592	-1.23736	-0.30726	0.803915	3.54764	1.8397	2.13107	5.01657	3.26925	5.88096	2.5194	3.38079	3.71639	2.93389	4.67151	3.10306
iba57	2	complement(3416683..3419890)	ENSDARG00000063446	2.01323	1.00951	0.01188	1.11407	0.15584	0.953914	-1.80709	-0.853669	0.0403914	11.7999	8.58789	6.74926	13.0474	11.3666	24.2372	13.8235	14.4386	12.2616	8.70322	10.9344	10.1722
CU633991.1	2	3428357..3429454	ENSDARG00000086314	-2.51436	-1.33019	0.423382	1.2547	0.327347	0.961394	3.15478	1.65754	0.239824	0.866153	0.383959	0.255331	0.559603	0.188856	0.16836	0.198785	0.0792519	0.572496	0.744396	0.785049	0.411406
cyp8b1	2	complement(3435888..3437862)	ENSDARG00000053068	1.37172	0.455988	0.862578	-2.87855	-1.52534	0.687294	-3.94857	-1.98133	0.232444	18.2382	6.08366	0.638781	0.362963	0.682464	12.2616	4.64161	7.66645	6.47167	1.44846	0	0.228721
cyp8b2	2	3452590..3454556	ENSDARG00000097556	-1.22377	-0.29133	0.935127	-3.41906	-1.7736	0.646372	-2.79388	-1.48227	0.546116	186.871	152.657	5.48735	2.86345	1.21235	109.91	40.058	67.1994	80.3727	17.6081	0.493001	1.33198
cyp8b3	2	3468069..3470019	ENSDARG00000097559	-1.74125	-0.80012	0.76539	-6.39503	-2.67695	0.140621	-3.67268	-1.87683	0.323372	232.58	200.205	2.15546	4.88154	3.18858	84.376	51.2382	56.2878	56.7062	8.74531	0.497044	2.59319
cx47.1	2	3472832..3498451	ENSDARG00000073896	1.06466	0.0903952	0.969314	1.1137	0.155366	0.983156	1.04606	0.0649708	0.982173	0.917103	0.711454	0.337939	0.839404	0.349939	0.757622	0.473576	0.755224	1.21234	0.541876	0.623422	0.65341
gene:ENSDARG00000076223	2	3502430..3509245	ENSDARG00000076223	1.26578	0.34003	0.630066	1.15014	0.20181	0.93592	-1.10055	-0.138219	0.88169	115.638	119.419	146.139	135.017	128.444	149.48	118.773	117.954	126.017	132.808	144.056	151.33
fuz	2	3516913..3519707	ENSDARG00000079730	1.10738	0.147153	0.957862	-1.06513	-0.0910236	0.995172	-1.1795	-0.238177	0.92637	0.682725	0.45397	0.603777	0.661641	0.223292	0.86259	0.940126	0.124937	0.376047	0.36672	0.232049	1.10256
gpt2l	2	3533117..3573000	ENSDARG00000019541	1.05319	0.0747721	0.929053	-1.15394	-0.206573	0.93592	-1.21533	-0.281346	0.680279	4.51869	4.32445	4.95474	3.38326	3.6832	4.05509	4.12883	2.44209	3.0146	3.04872	3.25349	4.54131
c1ql3b_1	2	3595333..3597975	ENSDARG00000036483	1.04967	0.0699368	0.969314	-1.22592	-0.29386	0.961394	-1.28681	-0.363797	0.854621	0.581927	0.515928	0.392103	0.930975	0.652544	0.581727	0.457901	0.365113	0.366318	0.357232	0.602786	0.568604
pter	2	complement(3603589..3616363)	ENSDARG00000063375	1.32114	0.401783	0.630169	1.51816	0.602328	0.613932	1.14913	0.200546	0.861918	4.86446	4.25368	9.11464	3.27198	5.86989	6.26907	5.2609	4.63384	6.10748	5.84146	9.05953	9.01422
mmp16b	2	complement(3630307..3678029)	ENSDARG00000058876	-2.08498	-1.06004	0.827758	1.78095	0.83265	0.93592	3.71326	1.89269	0.644466	0.112256	0	0	0	0	0	0.034351	0	0.0989299	0.0321587	0.06783	0
egfra	2	3696038..3820159	ENSDARG00000013847	-1.41981	-0.505694	0.194431	-1.63369	-0.708135	0.0430503	-1.15064	-0.202441	0.766258	6.1442	3.83238	5.69368	4.65771	2.53436	2.43917	3.42409	2.66675	3.13421	2.63404	2.62065	3.10928
npc1	2	3823813..3866971	ENSDARG00000017180	-1.2926	-0.370274	0.438454	-1.06887	-0.0960836	0.970161	1.20931	0.27419	0.643581	18.1634	12.8952	14.9482	14.8422	9.95689	10.4737	9.75167	6.76735	15.3488	12.4199	11.5958	13.6972
mpp7b	2	3881000..3894103	ENSDARG00000025168	1.12668	0.172084	0.969314	-3.00845	-1.58902	0.93592	-3.38958	-1.76111	0.821071	0.166498	0	0	0	0	0	0	0.121875	0	0	0	0
mkxb	2	3986083..4009200	ENSDARG00000114182	1.07234	0.100763	0.969314	-1.13543	-0.183234	0.981318	-1.21756	-0.283997	0.869746	2.13672	1.0333	1.71785	0.669329	1.1012	0.755146	1.6049	1.0664	0.68475	1.83636	0.704235	1.10717
rab18b	2	complement(4019538..4032732)	ENSDARG00000098344	1.20228	0.265773	0.625063	-1.01087	-0.0155997	0.995172	-1.21535	-0.281373	0.621314	26.3445	23.7654	24.929	28.5946	25.5615	26.9352	22.5521	22.6586	29.3115	20.2072	22.5047	24.6759
yme1l1b	2	complement(4044636..4070850)	ENSDARG00000104401	-1.0163	-0.0233281	0.969314	-1.24307	-0.313913	0.827704	-1.22314	-0.290585	0.628741	16.3296	16.2149	19.3951	16.0875	12.8696	12.581	14.6092	12.3878	11.1727	13.3707	12.9168	13.29
mib1	2	4074412..4161277	ENSDARG00000102184	1.27914	0.355173	0.498416	1.07029	0.0979998	0.970989	-1.19513	-0.257173	0.695106	13.54	13.4378	13.7317	10.2277	16.3917	13.7682	12.1748	9.13455	12.4447	10.3992	14.2412	13.8608
gata6	2	4207209..4217887	ENSDARG00000103589	3.35035	1.74431	0.657458	2.24839	1.16889	0.93592	-1.49011	-0.575419	0.888131	0.0460952	0	0	0	0.0402024	0.0358394	0	0.0674824	0	0	0	0.105093
cables1	2	4303125..4353808	ENSDARG00000099395	-2.7353	-1.4517	0.237933	-1.51914	-0.603254	0.901892	1.80056	0.848443	0.637029	1.05754	0.441222	0.513469	1.07177	0	0.290204	0.456862	0.136607	0.219292	0.374243	0.563831	0.709143
wacb	2	4383061..4388003	ENSDARG00000099015	-1.32931	-0.410675	0.747845	1.36124	0.444926	0.901892	1.80951	0.8556	0.36285	2.05358	1.61838	1.74885	1.76903	0.69652	1.24186	1.15208	1.08564	2.31251	1.961	2.99875	1.99418
bambib	2	4402765..4408818	ENSDARG00000099677	1.04179	0.0590712	0.969314	1.28582	0.362684	0.909596	1.23423	0.303613	0.808797	5.74542	1.87272	3.08848	2.7658	2.72653	2.82479	2.48206	2.59757	5.06336	2.83196	4.82454	3.14634
adipoqb	2	complement(4490604..4496358)	ENSDARG00000100086	1.72545	0.786975	0.14443	1.32069	0.40129	0.854796	-1.30648	-0.385685	0.644271	18.0442	29.8311	24.9064	24.4132	21.5696	21.2919	56.7102	34.0305	34.6105	35.1203	26.937	24.6028
CABZ01063651.1	2	complement(4631335..4642407)	ENSDARG00000103674	#N/A	#N/A	#N/A	#N/A	#N/A	#N/A	#N/A	#N/A	#N/A	0	0	0	0	0	0	0	0	0	0	0	0
tnk2b	2	complement(4729155..4797512)	ENSDARG00000104409	1.22142	0.288563	0.690616	1.32126	0.401911	0.809404	1.08174	0.113348	0.909894	1.89458	2.10446	3.41519	2.38244	2.01324	2.16725	3.07867	2.13601	3.28176	3.01321	2.80275	2.97895
tfr1a	2	complement(4849269..4874966)	ENSDARG00000101322	1.16764	0.223601	0.842511	-1.43019	-0.516206	0.848212	-1.66995	-0.739807	0.362671	18.2485	2.95471	8.24288	7.73744	4.25362	6.76239	15.4092	6.21774	5.69502	3.73744	9.31974	4.01532
si:ch211-162e15.3	2	4894873..4898291	ENSDARG00000104726	1.38428	0.469135	0.387795	1.07058	0.098389	0.97732	-1.29302	-0.370746	0.567443	74.0779	82.3904	82.1186	101.261	83.3711	97.7756	84.0894	103.091	82.6798	93.2095	96.6918	65.3988
dlg1l	2	complement(4900213..5074812)	ENSDARG00000102216	1.02847	0.0404961	0.969314	-1.06805	-0.0949729	0.970647	-1.09845	-0.135469	0.86396	5.9432	4.77388	7.04453	4.82561	3.87065	5.38098	4.74367	4.07775	6.16758	4.16088	4.33186	5.08271
ptmab	2	complement(5131964..5135125)	ENSDARG00000101766	1.00078	0.00112493	0.99908	1.14563	0.196135	0.937688	1.14473	0.19501	0.856519	654.987	670.707	360.881	453.207	440.197	623.052	380.066	271.575	930.439	465.785	396.292	559.107
phb2a	2	complement(5178172..5199431)	ENSDARG00000045297	1.16121	0.215625	0.73698	-1.35804	-0.441526	0.600275	-1.57697	-0.657151	0.0844307	55.959	54.6766	73.0351	71.3468	57.2897	57.5258	63.1693	54.6153	47.1923	43.7974	44.8141	39.5428
pex5lb	2	5245692..5280718	ENSDARG00000074403	1.07674	0.106665	0.973562	3.89318	1.96095	0.696786	3.61572	1.85428	0.496947	0	0.135908	0.0903784	0	0	0.0595937	0.070363	0.0561048	0.472835	0.395235	0	0.0582494
GNB4	2	5300405..5311253	ENSDARG00000019278	-1.28077	-0.357013	0.824363	-1.04884	-0.068789	0.995172	1.22114	0.288224	0.869428	2.5361	0.983703	1.68212	1.9116	0.691213	0.862679	1.60062	1.16025	1.39689	0.953571	1.43664	2.40919
MFN1	2	complement(5338759..5356686)	ENSDARG00000011884	1.96969	0.977971	0.799631	-1.73297	-0.793244	0.964617	-3.41341	-1.77121	0.684895	0	0.160056	0	0	0	0.210546	0.0828648	0	0	0	0.0818132	0
si:ch1073-184j22.1	2	5371492..5389696	ENSDARG00000055498	1.55682	0.638599	0.558872	1.09399	0.129601	0.986036	-1.42306	-0.508998	0.695106	19.7112	12.157	6.20763	4.11317	5.44571	31.4128	9.10378	6.27323	12.3001	12.6264	9.43211	7.07127
si:ch1073-184j22.2	2	complement(5397064..5404466)	ENSDARG00000078598	2.07034	1.04987	0.0760082	1.27563	0.351211	0.910252	-1.62299	-0.698657	0.341528	3.65558	1.94459	1.60925	2.98111	3.27327	2.34959	6.44328	4.21	2.70615	3.68627	2.78316	2.66701
sft2d3	2	5406236..5407872	ENSDARG00000070284	1.02539	0.0361723	0.969314	1.00612	0.00880853	0.995172	-1.01915	-0.0273638	0.982173	5.95487	7.01787	4.36715	5.37998	4.43356	6.38032	4.26665	3.50839	7.55191	4.61848	4.54161	5.1326
wdr33	2	complement(5410432..5443745)	ENSDARG00000018272	1.02418	0.0344688	0.969314	-1.08203	-0.113745	0.961394	-1.1082	-0.148213	0.83785	6.81325	6.79039	5.45748	5.44418	3.93418	5.95497	5.32724	4.5401	6.19077	5.20937	4.55693	5.3207
dusp28	2	5446087..5450198	ENSDARG00000059695	1.40581	0.491402	0.755335	-1.71246	-0.776067	0.852055	-2.40739	-1.26747	0.252505	0.854689	0.20666	1.09943	2.00799	0.745426	0.72494	1.78322	1.30812	0.479325	0.534213	0.704235	0.53144
proca_1	2	complement(5456541..5475910)	ENSDARG00000038258	1.25377	0.326277	0.910166	1.24022	0.310599	0.980917	-1.01093	-0.0156785	0.995134	0.144271	0	0.283529	0.414269	0.125828	0.261735	0.441477	0.0352017	0.0423814	0	0.392287	0.548209
proca_2	2	complement(5457388..5475921)	ENSDARG00000093079	4.82813	2.27146	0.0691994	-1.18264	-0.242017	0.98775	-5.70996	-2.51348	0.0337461	0.133074	0.0786543	0.0523048	0.114635	0.464248	0.172444	0.447934	0.422105	0	0	0.201022	0.101132
saga	2	complement(5480125..5505094)	ENSDARG00000012610	#N/A	#N/A	#N/A	#N/A	#N/A	#N/A	#N/A	#N/A	#N/A	0	0	0	0	0	0	0	0	0	0	0	0
cldn15la	2	complement(5508542..5517438)	ENSDARG00000016081	2.90747	1.53976	0.495199	-3.82811	-1.93663	0.854937	-11.1301	-3.47639	0.161871	0.254833	0	0	0.329284	0.333383	0.297202	0.81879	0.0932675	0.11229	0	0	0
crfb16	2	5521671..5536927	ENSDARG00000075181	-1.86429	-0.898627	0.289439	-2.2056	-1.14117	0.209893	-1.18307	-0.242541	0.869714	3.27943	2.27754	2.25572	1.93044	1.33476	0.679944	1.10387	0.920197	2.02308	0.469739	0.495393	1.2046
parla	2	complement(5543901..5561019)	ENSDARG00000039310	1.04265	0.0602545	0.946146	-1.11631	-0.15874	0.93592	-1.16392	-0.218994	0.764225	12.0215	7.62646	11.8442	11.7826	8.15476	10.1777	9.76066	7.15704	8.09883	8.12754	8.23243	11.4098
mb21d2	2	5563077..5581772	ENSDARG00000077690	1.46992	0.555733	0.759403	1.30974	0.389285	0.942076	-1.12229	-0.166448	0.957017	0.072458	0.149894	0.199358	0.145642	0.315975	0.150231	0.155207	0.0530386	0.148998	0.0415149	0.218911	0.293685
fgf12a	2	5587495..5681658	ENSDARG00000027957	1.16088	0.215218	0.895	1.69857	0.76432	0.780001	1.46317	0.549102	0.695106	0.603449	0.840729	0.304953	0.631227	0.413525	0.636754	0.791392	0.410167	0.87369	1.40768	1.01575	0.524118
cwc25	2	complement(5709424..5723786)	ENSDARG00000003382	-1.22338	-0.290876	0.614384	1.03175	0.0450917	0.995172	1.26222	0.335968	0.559943	25.5312	23.9414	17.7302	21.5177	14.0241	17.5602	15.0431	10.8717	24.826	20.729	18.3567	22.1548
sst2	2	complement(5726353..5728843)	ENSDARG00000014190	#N/A	#N/A	#N/A	#N/A	#N/A	#N/A	#N/A	#N/A	#N/A	0	0	0	0	0	0	0	0	0	0	0	0
nyap2b	2	complement(5734870..5776030)	ENSDARG00000093357	-23.9222	-4.58028	0.262866	-2.61495	-1.38678	0.761541	9.14827	3.1935	0.561722	0.12337	0.0437513	0.0581888	0.0850206	0	0	0	0	0.0434898	0	0.0447273	0.0187515
slc35d1b	2	5793908..5810326	ENSDARG00000027986	2.26525	1.17967	0.0481024	1.69193	0.758672	0.530216	-1.33885	-0.420996	0.684895	1.58607	1.54011	1.95927	1.95185	2.89835	2.23147	3.32807	3.86995	3.12836	3.11568	2.60129	2.29593
mier1b	2	complement(5811482..5836116)	ENSDARG00000001447	-1.08102	-0.1124	0.904695	1.04031	0.0570145	0.995172	1.1246	0.169414	0.86417	3.75641	2.82663	2.86607	3.12715	2.78064	2.52795	2.20237	1.66366	3.56085	2.25172	2.86107	3.57445
si:ch211-273k1.5	2	complement(5838938..5840494)	ENSDARG00000097093	-1.0385	-0.0544988	0.9739	-1.83143	-0.872974	0.870801	-1.76354	-0.818475	0.695106	1.04674	2.25377	0.881616	1.03051	0.782505	1.04638	0.274548	1.75132	1.4496	0.899595	0.406596	0
dis3l2	2	5841108..5884404	ENSDARG00000033259	-1.11038	-0.151055	0.856421	-1.09128	-0.126016	0.969498	1.01751	0.0250391	0.982173	3.25697	1.76915	3.05614	2.19317	1.52032	2.38966	1.97926	1.27598	2.2437	1.95151	1.89178	2.54492
si:ch211-168b3.1	2	5887626..5924301	ENSDARG00000056478	-1.58412	-0.663683	0.82655	1.03674	0.0520536	0.995172	1.64232	0.715736	0.826229	0.0660442	0.117108	0.116814	0	0.0288005	0	0.0909442	0.0241718	0.0291019	0.11352	0.02993	0.100383
si:ch211-168b3.2	2	5927255..5933351	ENSDARG00000096809	1.86786	0.90139	0.842511	-3.00858	-1.58908	0.93592	-5.61962	-2.49047	0.698077	0	0.026555	0	0	0	0	0.0549927	0	0	0	0	0
tmem125b	2	complement(5933902..5942355)	ENSDARG00000075980	1.25682	0.329773	0.842511	-1.07233	-0.100748	0.995172	-1.34772	-0.430521	0.817384	0.325697	0.288758	0.384046	0.196398	0.255654	0.227909	0.448492	0.238407	0.114813	0.167948	0.32472	0.396032
slc1a7a	2	5948534..5999636	ENSDARG00000034940	-4.05439	-2.01949	0.587441	-4.74005	-2.2449	0.805347	-1.16912	-0.225417	0.982173	0	0.157622	0.209636	0	0	0	0.0544033	0	0.0522267	0	0	0
scp2a	2	complement(6005199..6039757)	ENSDARG00000012194	1.06713	0.0937409	0.897221	1.06789	0.0947574	0.972193	1.0007	0.00101649	0.998959	15.5305	12.3197	16.867	12.1463	12.6985	10.7643	10.7867	12.4526	14.8123	12.7326	15.2338	13.4333
czib	2	complement(6042039..6051836)	ENSDARG00000063341	1.3482	0.431034	0.39871	1.31369	0.393629	0.726079	-1.02627	-0.0374058	0.982173	27.8788	22.2297	18.6076	37.4587	32.5727	29.4467	29.6172	21.9472	32.2954	31.4944	34.3268	32.5135
uck2b	2	complement(6051916..6065416)	ENSDARG00000022213	1.46031	0.546271	0.260771	1.51645	0.600702	0.331684	1.03845	0.0544309	0.972736	9.46077	7.80931	7.5397	6.01404	9.33251	9.8416	10.7216	5.68343	11.1552	12.1122	10.2899	9.57
aldh9a1b	2	6067371..6092062	ENSDARG00000037061	1.27375	0.349082	0.651653	1.23373	0.303031	0.901892	-1.03244	-0.0460513	0.982173	4.03068	4.70441	4.63246	5.14234	4.27187	3.37191	6.18264	4.74307	4.99104	5.34958	5.82672	5.23457
zte38	2	complement(6092058..6104035)	ENSDARG00000037056	1.54833	0.630714	0.868123	2.09271	1.06537	0.925523	1.35159	0.43466	0.90988	0.0842519	0	0	0.0725778	0	0.0655066	0.0773444	0.0616716	0.07425	0.0724084	0.152726	0.0640289
prdx1	2	complement(6104378..6115688)	ENSDARG00000058734	1.50165	0.586546	0.396844	1.51081	0.595318	0.62287	1.0061	0.00877246	0.99306	6.06924	4.12953	2.37165	3.61724	7.20142	5.89861	3.14215	2.81538	8.67615	6.27748	3.67795	4.10293
fzr1b	2	6126086..6149293	ENSDARG00000022810	1.26932	0.344061	0.667844	1.43844	0.524502	0.68305	1.13323	0.180441	0.86417	3.17181	2.6621	2.49336	3.02377	1.95487	3.22239	3.37765	2.75512	3.54068	4.50689	3.67976	3.43895
IPO13	2	complement(6150855..6182098)	ENSDARG00000076996	1.14834	0.199545	0.763774	1.12654	0.1719	0.93592	-1.01935	-0.0276443	0.982173	5.36298	3.3736	5.39026	4.77387	4.14282	4.07049	4.5013	4.05651	4.81635	3.86286	5.80983	5.20138
si:ch73-344o19.1	2	6181383..6197262	ENSDARG00000096791	-1.41628	-0.502108	0.527578	-1.47277	-0.558532	0.714765	-1.03989	-0.0564245	0.981873	6.01014	4.3508	3.51092	3.7049	2.74113	2.52939	1.97411	2.34095	1.94373	1.9429	4.09802	3.01708
rec8a	2	complement(6212205..6232517)	ENSDARG00000078329	5.93208	2.56854	0.678796	1.0556	0.0780585	0.995172	-5.61964	-2.49048	0.695106	0	0	0	0	0.13116	0	0	0	0	0	0	0
gng5	2	6243144..6249163	ENSDARG00000039830	1.30909	0.388564	0.446131	1.00381	0.00549168	0.995172	-1.30412	-0.383073	0.474312	85.9269	81.2357	83.6143	80.0094	92.4043	111.348	81.1796	59.1319	89.8176	78.1498	66.035	76.9252
zp3b	2	6253246..6258796	ENSDARG00000039828	1.03456	0.0490152	0.974	1.32573	0.406792	0.93592	1.28145	0.357777	0.86417	0.256344	0.227271	0.226701	0.552061	0.279466	0.298965	0.235327	0.234552	0.451825	0.220309	0.348511	0.584441
arl14	2	complement(6261413..6262441)	ENSDARG00000063223	-1.18493	-0.244801	0.873309	-1.05445	-0.0764847	0.995172	1.12375	0.168316	0.93602	1.38635	2.86794	1.22604	1.09473	0.806079	1.34737	1.06057	1.18393	1.22177	1.58862	1.46596	1.66817
ppm1la	2	complement(6265768..6292510)	ENSDARG00000063218	1.09667	0.133125	0.855087	1.31156	0.391283	0.760853	1.19595	0.258157	0.720602	12.77	13.7339	21.9398	16.2551	14.3524	13.989	11.4008	15.3865	21.0771	17.6503	19.7677	21.2105
otol1a	2	6303639..6316167	ENSDARG00000001771	-2.37008	-1.24493	0.632609	-1.92059	-0.941551	0.901892	1.23403	0.303382	0.953571	0.0782102	0.06934	0.55333	0.20212	0.0682118	0.0608091	0.143596	0	0.137851	0.067216	0	0.178312
si:dkey-119f1.1	2	complement(6321623..6373829)	ENSDARG00000058719	-1.14414	-0.194265	0.793847	-1.26264	-0.336439	0.836332	-1.10357	-0.142175	0.86417	4.98698	2.88995	3.71221	2.83198	2.28406	3.01096	2.48088	1.95777	3.04455	2.46621	2.27263	2.75248
rgs13	2	complement(6475567..6482240)	ENSDARG00000017653	-1.0092	-0.0132098	0.98579	1.35564	0.438971	0.813049	1.36811	0.452181	0.551111	10.6889	10.1359	5.69914	8.5673	8.26862	8.31074	5.97288	5.0347	17.857	8.30766	7.83469	11.7258
rgs1	2	complement(6511499..6519017)	ENSDARG00000089077	#N/A	#N/A	#N/A	#N/A	#N/A	#N/A	#N/A	#N/A	#N/A	0	0	0	0	0	0	0	0	0	0	0	0
rgs18	2	complement(6535865..6548838)	ENSDARG00000036106	1.02951	0.0419527	0.969314	1.47796	0.563607	0.653878	1.4356	0.521654	0.482589	5.05273	4.47967	4.46845	4.59442	4.16197	2.78272	5.21828	2.97939	7.85442	5.48838	4.13437	8.47982
brinp3b	2	6734108..6807174	ENSDARG00000075352	-1.08382	-0.11612	0.969314	-1.19571	-0.257871	0.975188	-1.10324	-0.141751	0.97201	0.202305	0.0448402	0.656008	0.130705	0.132332	0.176956	0.116074	0.259149	0.200575	0.173866	0.160442	0.230619
rgs5b	2	6885852..6889119	ENSDARG00000017860	-1.32578	-0.406837	0.732203	-1.30858	-0.388002	0.932355	1.01314	0.0188348	0.988535	3.69334	3.68377	8.57393	2.48561	3.42251	2.60239	1.48336	3.04143	3.25489	3.37255	3.87056	2.36826
nos1apb	2	6926100..6952754	ENSDARG00000058701	1.10852	0.14864	0.969314	-1.04674	-0.0659034	0.995172	-1.16034	-0.214543	0.982173	0.117995	0	0	0	0	0	0.0541603	0.0431854	0.0519935	0	0	0.0448361
ddr2b	2	6963296..6996486	ENSDARG00000058695	-1.505	-0.589768	0.916205	2.46226	1.29998	0.908107	3.70571	1.88975	0.656682	0.0417854	0.0370463	0	0	0	0.0324885	0	0	0.184124	0.0359115	0	0
xpr1b	2	6999369..7057330	ENSDARG00000029671	-1.25227	-0.324545	0.592818	1.03202	0.0454697	0.995172	1.29237	0.370015	0.539166	5.67637	4.57247	4.55145	4.27512	3.22503	3.15245	2.82882	2.68297	5.57422	3.87487	4.11589	4.85619
cdc14aa	2	7075220..7105532	ENSDARG00000013858	-1.40706	-0.49268	0.856426	-2.21822	-1.1494	0.872359	-1.5765	-0.656722	0.855954	0.139203	0.0411385	0.0547139	0.23983	0.0404691	0.108232	0	0.101895	0	0.0398783	0.126169	0.0352634
vcam1a	2	7106837..7113911	ENSDARG00000078201	1.407	0.492627	0.80069	1.43494	0.520995	0.93592	1.01986	0.0283672	0.98891	0.488641	2.66122	0.740806	0.360801	1.88734	2.00817	0.961242	0.306583	0.430633	0.539938	1.4552	3.76658
extl2	2	complement(7120582..7131691)	ENSDARG00000063191	1.28979	0.367134	0.738966	1.31134	0.391041	0.905005	1.01671	0.0239071	0.984248	0.65885	0.55873	0.945772	0.616911	0.574623	1.0468	0.657428	0.461303	0.984556	0.787804	0.778901	0.805484
zgc:110366	2	7132281..7148449	ENSDARG00000004167	1.41862	0.504489	0.563048	-1.05163	-0.0726336	0.995172	-1.49187	-0.577123	0.499686	3.95758	3.50873	4.39736	4.13038	2.3896	6.44997	4.05231	4.79104	2.4146	3.7937	3.65598	4.16442
rc3h1b	2	complement(7149588..7189594)	ENSDARG00000063182	1.12024	0.163808	0.809185	-1.22581	-0.293734	0.865065	-1.3732	-0.457542	0.337037	4.9597	3.62656	5.54679	3.96415	4.06924	4.83021	3.77858	3.12518	3.28945	3.21885	3.33671	3.77894
si:ch211-13f8.1	2	7192966..7209705	ENSDARG00000093342	1.12664	0.172029	0.969314	-3.00858	-1.58908	0.93592	-3.38959	-1.76111	0.821071	0	0.0258769	0	0	0.0254559	0	0	0	0	0	0	0
si:ch211-13f8.2	2	7213146..7236294	ENSDARG00000078299	#N/A	#N/A	#N/A	#N/A	#N/A	#N/A	#N/A	#N/A	#N/A	0	0	0	0	0	0	0	0	0	0	0	0
zgc:153115	2	complement(7238549..7246848)	ENSDARG00000069342	3.44938	1.78634	1.43865e-06	-1.10207	-0.140213	0.970161	-3.80145	-1.92655	8.40108e-08	1.91651	3.07818	1.24456	1.48347	4.9903	6.88905	5.45665	4.22894	2.74156	1.43227	1.10769	1.54093
si:dkeyp-106c3.3	2	7279646..7286309	ENSDARG00000093159	#N/A	#N/A	#N/A	#N/A	#N/A	#N/A	#N/A	#N/A	#N/A	0	0	0	0	0	0	0	0	0	0	0	0
si:dkeyp-106c3.2_1	2	complement(7288097..7289403)	ENSDARG00000095549	-6.50769	-2.70215	0.644882	-7.54312	-2.91516	0.85958	-1.15911	-0.213016	0.982173	0	0	0.41678	0	0	0	0	0	0	0	0	0
si:dkeyp-106c3.1	2	7295515..7412581	ENSDARG00000090623	1.84176	0.881085	0.738101	1.59026	0.669265	0.93592	-1.15815	-0.21182	0.96822	0.0361281	0.0160153	0.106501	0.0311221	0	0.16854	0.116081	0	0.0636784	0.124198	0	0.0823688
asip2b	2	complement(7419986..7431590)	ENSDARG00000114760	-1.4211	-0.507003	0.307066	-1.35844	-0.441947	0.66085	1.04613	0.065056	0.959814	7.65838	8.93613	9.00294	4.23104	3.65435	5.17622	3.78237	3.88491	5.04653	4.60127	4.02974	7.02308
ripk2	2	7557912..7587660	ENSDARG00000104290	-1.06251	-0.0874724	0.969314	1.00078	0.00112192	0.999667	1.06333	0.0885944	0.982173	1.19028	0.131911	0.964923	0.384508	0.519059	0.809774	0.614641	0	0.852296	0.511481	0.134854	0.904579
CABZ01021599.1	2	complement(7601996..7605121)	ENSDARG00000112870	2.0293	1.02099	0.632791	1.36459	0.448471	0.961394	-1.48711	-0.572514	0.829089	0.392342	0.695688	0.693945	0.337978	1.88202	0.610098	1.08052	0	0.864413	0.674378	0	1.19267
CABZ01021592.1	2	complement(7663942..7666021)	ENSDARG00000114516	-1.2066	-0.270942	0.742501	1.02801	0.0398487	0.995172	1.24039	0.310791	0.723055	86.683	153.39	47.1428	75.1291	58.9383	58.7315	60.7377	61.6382	105.235	82.0995	93.4778	76.2284
CCDC39	2	complement(7668573..7696503)	ENSDARG00000100981	-1.0413	-0.0583873	0.978701	-1.18063	-0.239557	0.98775	-1.1338	-0.18117	0.97481	0	3.87726	3.00809	4.23819	2.0978	2.23849	0.0669117	3.97479	2.34457	0	4.62438	2.49265
dcun1d1	2	complement(7698446..7711522)	ENSDARG00000099642	1.08733	0.120794	0.874998	-1.17654	-0.234549	0.920212	-1.27929	-0.355342	0.582429	13.3721	11.9207	10.3097	10.6331	10.381	9.8828	10.4546	8.71262	14.8279	6.94593	6.92571	8.71062
eif4a2	2	7715810..7727248	ENSDARG00000016477	1.20365	0.26742	0.734657	-1.17161	-0.228488	0.93592	-1.41021	-0.495908	0.449362	36.7842	41.2758	73.4645	50.7211	45.4898	64.0718	41.8819	41.5502	37.0249	37.1229	45.2429	41.814
b3gnt5b	2	complement(7749394..7757273)	ENSDARG00000004396	-1.21101	-0.276205	0.804477	-1.18226	-0.241553	0.938134	1.02431	0.0346525	0.982173	3.8094	3.72674	2.24593	3.4513	2.46316	3.11504	1.92942	1.24999	4.39905	1.46761	1.90494	3.04477
tbl1xr1b	2	complement(7764671..7800702)	ENSDARG00000008966	1.04772	0.0672576	0.933296	-1.22791	-0.29621	0.851849	-1.28651	-0.363468	0.494337	5.37028	4.39226	4.36958	4.31889	4.3208	4.31411	3.40188	3.10418	4.50572	3.35508	2.83784	3.38849
kcnmb2	2	7818368..7829400	ENSDARG00000006568	1.76425	0.819053	0.408963	1.09318	0.128525	0.98775	-1.61387	-0.690528	0.541803	0.905174	1.60503	3.79498	1.38622	2.36837	3.20611	2.95453	2.06135	1.24089	1.90161	2.46125	2.06371
si:ch211-38m6.7	2	complement(7831914..7845110)	ENSDARG00000063129	1.27606	0.3517	0.892898	1.66913	0.7391	0.914086	1.30803	0.3874	0.878904	0.202635	0	0.557522	0.058186	0.11782	0.210068	0.310037	0.0988848	0.297633	0.348301	0.183661	0.307994
si:ch211-38m6.6	2	7847480..7874384	ENSDARG00000076959	2.14362	1.10005	0.352981	1.49952	0.584503	0.901892	-1.42953	-0.515545	0.763722	0.18955	0.0840261	0.223508	0.163286	0.303083	0.270191	0.406022	0.138749	0.22273	0.135754	0.257702	0.288105
ephb3a	2	complement(7923964..8017579)	ENSDARG00000031548	1.05195	0.0730642	0.952943	1.23786	0.307848	0.901892	1.17673	0.234784	0.816795	2.28297	2.24352	2.3352	1.6823	1.60729	1.98889	1.94429	1.48991	2.59372	2.88397	2.14399	2.19486
pcolce2a	2	8031234..8050498	ENSDARG00000008450	1.63497	0.709261	0.653643	2.21616	1.14806	0.567269	1.35548	0.438803	0.818735	0.120616	0.149711	0.11378	0.103903	0.126236	0.187561	0.110727	0.194238	0.382671	0.352447	0.174916	0.128331
pls1	2	complement(8059957..8111346)	ENSDARG00000039272	-1.02211	-0.0315571	0.975413	-1.15293	-0.205306	0.967141	-1.12799	-0.173749	0.916717	1.45329	0.566927	0.616916	0.400615	0.709803	0.497178	0.426926	0.595726	0.71723	0.44964	0.658607	0.574319
chst2a	2	8112449..8114608	ENSDARG00000075007	1.3258	0.406866	0.470383	1.10508	0.144147	0.950656	-1.19974	-0.262719	0.714756	6.76953	6.34333	5.51622	6.96938	7.24814	7.06062	7.07343	5.55952	8.00302	6.38552	6.23542	6.23212
dipk2aa	2	8261109..8312199	ENSDARG00000012816	-1.2336	-0.302875	0.792666	1.11698	0.159597	0.972193	1.3779	0.462473	0.665522	4.89855	1.69482	6.33966	5.60924	1.97986	1.90433	5.20987	2.53622	3.79056	4.7747	4.81888	5.44793
si:ch211-71m22.1	2	complement(8586415..8611675)	ENSDARG00000058638	1.14569	0.196214	0.842511	1.62456	0.700052	0.399919	1.41798	0.503838	0.492288	3.47234	3.03577	2.95708	3.15738	3.11256	2.28731	3.36475	2.57702	6.03525	5.55398	2.62267	5.02119
si:ch211-71m22.5	2	complement(8617816..8636175)	ENSDARG00000091266	#N/A	#N/A	#N/A	#N/A	#N/A	#N/A	#N/A	#N/A	#N/A	0	0	0	0	0	0	0	0	0	0	0	0
si:ch211-71m22.3	2	complement(8644422..8648440)	ENSDARG00000079075	2.32622	1.21799	0.443449	2.14824	1.10316	0.786029	-1.08285	-0.114832	0.981657	0.662281	0.391446	0.650775	1.14103	1.44404	0.944038	2.73592	0.323189	4.572	0.189728	0.800357	0.671085
fubp1	2	8649293..8663104	ENSDARG00000029248	1.06722	0.093859	0.91308	-1.09425	-0.129945	0.963367	-1.16781	-0.223804	0.793411	36.242	28.6367	32.2553	27.1659	28.8793	30.4446	27.0201	18.1172	28.8656	22.7702	25.5728	28.6322
miga1	2	complement(8663108..8688759)	ENSDARG00000020596	1.09186	0.126794	0.864828	-1.44512	-0.53119	0.461186	-1.57788	-0.657984	0.116866	16.4536	14.7155	23.6559	21.9651	15.8607	14.5883	18.4612	16.5163	11.6172	13.3551	13.0379	11.1514
usp33	2	8717155..8777496	ENSDARG00000016163	1.17245	0.229521	0.670361	-1.07017	-0.0978366	0.96656	-1.25471	-0.327358	0.502254	8.67178	5.63807	6.92453	6.50039	6.28938	7.71235	6.22899	5.07813	7.05239	5.23001	5.29501	6.52092
zzz3	2	8778490..8842472	ENSDARG00000077581	1.23698	0.306818	0.535425	-1.05774	-0.0809915	0.977151	-1.30841	-0.387809	0.384891	5.2041	3.67797	4.47675	4.2437	3.7958	5.22699	4.06337	3.83646	4.8148	3.78814	3.29002	3.61717
ak5	2	complement(8845840..9059955)	ENSDARG00000012555	1.08081	0.112112	0.94338	1.87371	0.905898	0.407097	1.73362	0.793786	0.340864	2.18341	1.27679	1.69812	1.64076	1.01291	1.98657	1.53528	1.19017	6.55048	2.15595	1.17895	2.36542
pigk	2	9061885..9138497	ENSDARG00000024479	-1.00459	-0.00660258	0.996199	1.14683	0.197654	0.97732	1.15209	0.204257	0.917485	3.36905	0.213354	1.51338	2.00392	1.18933	1.80868	1.62006	0.763321	3.03979	0.896213	1.52679	2.01173
st6galnac5a	2	complement(9160947..9260002)	ENSDARG00000039220	3.57804	1.83917	0.797268	3.08399	1.6248	0.93592	-1.1602	-0.214373	0.982173	0	0	0	0	0.0883904	0	0	0	0	0	0	0.0770203
st6galnac3	2	complement(9330146..9489611)	ENSDARG00000058473	1.37779	0.462361	0.789432	-1.23803	-0.308049	0.961722	-1.70575	-0.77041	0.625137	0.487496	0.308719	0.492713	0.659918	0.182218	0.649771	0.831124	0.458798	0.552373	0.179558	0.50497	0.26463
cope	2	complement(9513160..9527210)	ENSDARG00000018562	-1.05889	-0.08255	0.922267	-1.16866	-0.22485	0.932643	-1.10366	-0.1423	0.86417	69.3299	77.7762	50.4963	62.2793	53.3936	65.1315	42.7634	34.8943	70.8614	49.5542	46.3442	43.8195
slc25a24l	2	complement(9529488..9544161)	ENSDARG00000038977	2.60897	1.38348	0.754092	3.52677	1.81835	0.870801	1.35179	0.434866	0.92718	0	0.0595126	0	0	0	0.0521908	0.0616222	0.0491353	0	0.173069	0.12168	0
CU929379.1	2	9536021..9558915	ENSDARG00000115192	#N/A	#N/A	#N/A	#N/A	#N/A	#N/A	#N/A	#N/A	#N/A	0	0	0	0	0	0	0	0	0	0	0	0
dnajb4	2	9552456..9560307	ENSDARG00000038978	1.45209	0.538131	0.235195	-1.80976	-0.855802	0.0239093	-2.62794	-1.39393	1.3879e-06	31.4286	35.2765	31.5182	27.8624	36.9913	39.9517	36.415	31.3589	13.1227	18.8288	16.8702	15.6295
gipc2	2	9560740..9590850	ENSDARG00000009488	-1.01023	-0.0146877	0.980397	-1.31512	-0.395191	0.747515	-1.3018	-0.380503	0.525589	21.8336	21.1981	11.609	16.789	15.0704	16.5072	14.4486	10.1481	19.0646	9.61245	8.92336	14.4552
txndc12	2	complement(9592319..9607879)	ENSDARG00000038980	1.73065	0.791318	0.0334237	1.35348	0.436678	0.634467	-1.27867	-0.35464	0.55374	20.397	16.805	14.8801	26.0899	29.9635	28.5539	27.0941	21.3399	23.2866	25.1879	22.7821	27.5184
zmp:0000001127	2	complement(9621289..9625548)	ENSDARG00000067814	#N/A	#N/A	#N/A	#N/A	#N/A	#N/A	#N/A	#N/A	#N/A	0	0	0	0	0	0	0	0	0	0	0	0
zgc:153615	2	complement(9629558..9646857)	ENSDARG00000038981	-1.32101	-0.401641	0.803213	-1.1006	-0.138294	0.990175	1.20026	0.263347	0.890625	0.981934	0.580379	1.08066	1.12783	0.228374	0.508975	0.480762	0.910437	0.403837	1.23772	0.711991	0.74624
selenot1a	2	complement(9684305..9696283)	ENSDARG00000058354	1.39444	0.479691	0.337094	1.08667	0.119911	0.963619	-1.28323	-0.35978	0.560649	38.4691	34.6732	27.2596	47.4647	45.1068	46.3926	38.9221	32.841	38.9755	44.0557	35.6952	30.277
dvl3a	2	complement(9702053..9744081)	ENSDARG00000015707	1.47952	0.565133	0.193573	-1.05958	-0.0834889	0.981318	-1.56767	-0.648622	0.0990135	7.34848	6.445	5.59031	5.75169	6.44351	7.80232	7.43512	7.31662	6.51093	6.72294	4.33284	4.4737
si:ch1073-170o4.1	2	complement(9746437..9748061)	ENSDARG00000092780	1.89259	0.920361	0.575655	-1.22679	-0.294884	0.97233	-2.3218	-1.21524	0.417943	1.21306	0.47799	0.635723	1.04497	1.64575	1.36235	1.73227	0.394642	0.35635	0.347511	1.71029	0.102432
pcyt1aa	2	9755422..9779959	ENSDARG00000011233	1.40374	0.489279	0.457162	1.03756	0.0531956	0.995172	-1.35293	-0.436083	0.55265	13.0422	4.45176	10.3037	8.76332	8.36053	8.36584	15.3852	7.39873	8.10319	6.22089	11.4663	8.57359
ap2m1a	2	complement(9789811..9818711)	ENSDARG00000002790	-1.03743	-0.0530082	0.969314	-1.0161	-0.0230489	0.995172	1.02098	0.0299593	0.982173	76.6913	72.1754	57.8081	66.4757	45.9473	64.0787	53.8123	44.1106	74.7801	64.1342	50.2952	62.9151
anxa13l	2	9821757..9842240	ENSDARG00000013613	1.02587	0.0368549	0.969314	-1.12312	-0.16751	0.93592	-1.15218	-0.204365	0.792257	14.432	16.5445	14.0889	12.3745	9.7769	11.6907	14.1731	10.8589	16.3865	9.11496	9.30855	14.0287
si:ch211-252f13.5	2	complement(9848636..9857932)	ENSDARG00000097535	-1.18035	-0.23922	0.860428	1.1688	0.22503	0.962177	1.3796	0.46425	0.729365	1.28475	0.35595	1.08884	0.864634	0.42019	0.561884	0.663422	0.646541	1.52144	0.552074	0.982505	0.823813
abi1b	2	complement(9868601..9915870)	ENSDARG00000062991	1.72978	0.79059	0.674913	-1.37267	-0.456985	0.949486	-2.37442	-1.24757	0.470202	0.227848	0.0505016	0.268667	0.196277	0.19872	0.221442	0.261459	0.291869	0.150599	0	0.0516282	0.259736
CR956623.1	2	9918678..9941405	ENSDARG00000058410	#N/A	#N/A	#N/A	#N/A	#N/A	#N/A	#N/A	#N/A	#N/A	0	0	0	0	0	0	0	0	0	0	0	0
tsen15	2	9946121..9957805	ENSDARG00000069280	-1.26957	-0.344343	0.730154	1.1144	0.156262	0.969484	1.41481	0.500604	0.582466	0.975966	0.53131	0.524932	0.471991	0.388266	0.532507	0.377242	0.238132	0.739388	0.544466	0.682834	0.637606
zgc:55943	2	complement(9958081..9971728)	ENSDARG00000029292	1.3709	0.455119	0.258726	1.19335	0.255014	0.870801	-1.14878	-0.200105	0.761433	16.81	15.1293	13.5146	13.6031	16.1604	20.2484	13.9704	13.2369	19.3597	14.9394	16.1016	15.7269
CR956623.2	2	complement(9961868..10014821)	ENSDARG00000111651	-2.59447	-1.37544	0.842511	-3.00858	-1.58908	0.93592	-1.15961	-0.213643	0.982173	0	0.268185	0	0	0	0	0	0	0	0	0	0
sec22ba	2	9970942..9983661	ENSDARG00000030108	1.22645	0.294487	0.613491	1.08577	0.118714	0.961691	-1.12957	-0.175772	0.821071	22.3443	15.8955	22.4819	22.5907	23.2803	22.4183	18.977	15.3764	24.6441	19.6057	20.1308	19.8789
imp3	2	complement(9983079..9989947)	ENSDARG00000115266	1.51732	0.601521	0.39671	1.26128	0.334886	0.901892	-1.203	-0.266635	0.809541	13.9394	6.29583	8.06327	12.5743	16.7451	15.4391	8.0884	8.0858	14.8342	11.9799	10.8463	9.89396
slc35a3b	2	9990491..10040264	ENSDARG00000020981	-2.32831	-1.21928	0.417179	-1.05894	-0.0826192	0.995172	2.19872	1.13666	0.48731	0.664469	0.428442	0.498597	0.41629	0.158052	0.0469664	0.44363	0.0442168	0.958233	0.259574	0.16425	0.413162
fam78ba	2	complement(10056100..10062575)	ENSDARG00000063018	-3.32024	-1.73129	0.642327	-1.66375	-0.734441	0.93592	1.99564	0.996848	0.849186	0	0.0450799	0.119912	0.0876025	0	0	0	0.0372193	0.0448104	0	0	0.0772838
cmpk	2	10063747..10076929	ENSDARG00000019924	1.02127	0.0303615	0.969314	-1.21561	-0.28168	0.901892	-1.24146	-0.312042	0.695106	52.5898	60.6652	40.7329	38.1331	47.6012	55.0914	29.0751	25.34	60.9517	31.2075	29.5072	29.7231
bcl6ab	2	complement(10087334..10098191)	ENSDARG00000069295	1.64788	0.720615	0.151235	1.17754	0.235779	0.93592	-1.39943	-0.484836	0.456254	13.7801	7.74976	10.7922	7.1313	12.7809	17.2706	10.8095	9.56	18.0351	9.89866	3.96132	11.8011
insl5b	2	10127762..10129061	ENSDARG00000069294	#N/A	#N/A	#N/A	#N/A	#N/A	#N/A	#N/A	#N/A	#N/A	0	0	0	0	0	0	0	0	0	0	0	0
ahsg2	2	10134345..10141741	ENSDARG00000069293	1.41351	0.499278	0.892671	-7.13073	-2.83405	0.863703	-10.0793	-3.33333	0.542543	0.0798921	0.0708312	0	0.0688221	0	0.0621169	0	0.175441	0	0	0	0
pfn2l	2	10147029..10151839	ENSDARG00000012682	1.34141	0.42375	0.511511	1.11744	0.160203	0.950082	-1.20043	-0.263547	0.762445	63.0823	52.6051	63.7078	76.1797	76.7974	66.6949	82.5359	45.9291	56.076	62.8282	79.0076	66.0224
nsun4	2	10160484..10169433	ENSDARG00000021324	1.02832	0.0402837	0.969314	1.01702	0.0243446	0.995172	-1.01111	-0.0159391	0.988432	2.72894	2.57065	4.02229	2.5712	1.93381	2.12178	2.81836	2.49695	3.382	1.97887	2.39612	3.3053
dmbx1a	2	complement(10183640..10192487)	ENSDARG00000009922	1.10853	0.148643	0.969314	-1.73505	-0.794974	0.962177	-1.92335	-0.943618	0.86417	0.0537795	0	0	0	0.0234522	0	0	0.019683	0	0	0.0243719	0
gadd45aa	2	10280645..10284572	ENSDARG00000043581	1.46217	0.548112	0.536226	1.5012	0.586117	0.763865	1.02669	0.0380047	0.982173	6.45156	6.14044	2.46121	3.75956	4.96482	5.31121	5.92262	5.34751	10.6188	8.07235	4.38559	3.46093
gng12a	2	complement(10287133..10338813)	ENSDARG00000003375	1.07294	0.101575	0.892898	-1.04612	-0.0650419	0.987571	-1.12242	-0.166617	0.831864	11.19	10.2789	7.34552	9.98732	8.30059	8.4761	9.31946	6.88211	10.9799	8.52642	7.68509	7.84654
wls	2	complement(10342177..10386738)	ENSDARG00000009534	1.05908	0.0828089	0.923783	-1.04951	-0.0697118	0.98775	-1.11151	-0.152521	0.86417	43.3011	38.7214	36.6828	36.3355	34.2212	41.3301	29.5452	24.5498	37.8313	29.4261	31.7952	39.6168
scinlb	2	complement(10396579..10450784)	ENSDARG00000058348	1.03216	0.0456658	0.969314	-1.15953	-0.213538	0.93592	-1.19682	-0.259204	0.784975	105.243	88.194	121.673	128.25	116.199	113.043	78.8023	56.027	112.962	52.6019	88.7432	110.731
ccdc18	2	complement(10467799..10564019)	ENSDARG00000078822	1.08477	0.117388	0.940526	1.35571	0.439048	0.901892	1.24977	0.32166	0.816795	0.993551	0.553103	0.408679	0.318468	0.40304	0.64674	0.487864	0.372091	0.916328	0.456729	0.670153	0.825307
BX323564.1	2	complement(10597810..10600950)	ENSDARG00000098557	-1.20924	-0.274105	0.942166	-1.2223	-0.289593	0.985745	-1.01079	-0.0154876	0.99594	0	1.57709	0.0446281	4.23844	0.330092	2.14816	0	1.49602	0.133418	0.195164	2.7786	1.58197
mtf2	2	complement(10603550..10641998)	ENSDARG00000005590	-1.31044	-0.390052	0.642436	1.04653	0.0656076	0.995172	1.37141	0.45566	0.58497	1.56925	1.26185	1.16187	1.06887	0.891203	1.06404	0.686792	0.414056	1.94578	1.01933	1.00885	1.02617
dipk1aa	2	10642047..10687230	ENSDARG00000062955	1.28996	0.367324	0.599625	1.00258	0.00371574	0.997534	-1.28664	-0.363608	0.627663	4.69713	2.94556	4.68307	6.34905	4.69616	4.83973	5.32869	4.02527	3.60104	4.39786	5.3649	3.8599
rpl5a	2	complement(10687276..10703621)	ENSDARG00000020197	-1.01719	-0.0245839	0.970232	-1.07478	-0.104042	0.97732	-1.05662	-0.0794579	0.948383	1124.95	1066.95	895.163	1075.03	727.67	1021	728.849	743.804	1036.17	914.893	729.97	952.838
evi5a	2	10709557..10760516	ENSDARG00000077666	-1.54429	-0.626942	0.75348	1.6254	0.700795	0.901892	2.51009	1.32774	0.36285	0.213812	0.118477	0.378175	0.299302	0.303027	0.166241	0	0.0391271	0.282644	0.091878	0.339135	0.853076
gfi1aa	2	10766744..10785866	ENSDARG00000020746	-1.11272	-0.154089	0.969314	1.66946	0.739384	0.901892	1.85764	0.893473	0.678328	0.212158	0.250795	0.166778	0.121841	0.0616787	0.164955	0	0.25883	0.31162	0.303891	0.25639	0.322468
rpap2	2	complement(10790875..10821053)	ENSDARG00000038397	1.2676	0.342095	0.659897	-1.00639	-0.00919183	0.995172	-1.2757	-0.351287	0.681651	2.94975	3.40391	4.30634	4.71904	4.12441	4.91455	3.52458	2.91319	4.29135	3.33988	2.9706	3.84295
glmna	2	10821127..10857898	ENSDARG00000058267	1.04729	0.066657	0.948795	1.02291	0.0326744	0.995172	-1.02383	-0.0339826	0.982173	7.87835	5.50202	5.7607	7.05211	5.75798	7.56276	4.12128	4.09158	8.72734	4.99304	4.18865	7.4256
cdc7	2	complement(10863942..10877765)	ENSDARG00000023584	-1.44263	-0.528704	0.724463	1.26004	0.333473	0.937306	1.81778	0.862178	0.493748	1.59143	0.846561	0.437857	0.822548	0.740255	0.783654	0.29219	0.194151	1.91675	0.638267	0.480803	1.41101
tceanc2	2	10878406..10880549	ENSDARG00000062919	-1.30822	-0.387605	0.768157	-1.05784	-0.0811269	0.995172	1.23669	0.306478	0.844912	3.58741	1.97413	1.45866	2.55752	2.26568	1.44271	1.24918	0.905501	2.39841	2.12629	2.24241	1.88022
cdcp2	2	complement(10881168..10906854)	ENSDARG00000075866	1.1477	0.198745	0.940031	-1.28976	-0.367097	0.962098	-1.48025	-0.565842	0.816795	0.320776	0.455032	0	0.221063	0.223814	0.249406	0.294477	0.187844	0.282695	0.0551367	0.174444	0.24378
mrpl37	2	10914023..10931770	ENSDARG00000062916	-1.01853	-0.0264926	0.969314	-1.25051	-0.322517	0.815698	-1.22776	-0.296024	0.615443	30.3908	25.7543	34.9046	33.9318	22.0995	28.4777	24.4209	21.2635	25.4613	24.4905	21.3207	21.7763
ssbp3a	2	complement(10934479..11027410)	ENSDARG00000058237	-1.13243	-0.179425	0.908224	1.04914	0.069213	0.995172	1.18809	0.248638	0.874334	3.52899	0.793862	1.30426	0.635225	0.780945	1.26953	1.59565	0.53977	1.85674	0.995881	1.8141	1.16083
acot11a	2	11028923..11063878	ENSDARG00000058229	-1.94027	-0.95626	0.206923	-2.13368	-1.09334	0.196502	-1.09968	-0.137084	0.937458	4.62093	1.81124	2.81042	3.26832	1.52723	2.08005	0.714455	0.676495	1.32888	0.668859	1.58712	1.81133
fam151a	2	complement(11069055..11082914)	ENSDARG00000058218	1.78756	0.837993	0.720159	3.09635	1.63057	0.522113	1.73217	0.792578	0.715125	0.0528353	0	0.186903	0.227572	0.0921617	0.0821599	0.194014	0.270725	0.0931261	0.499489	0.430992	0.321226
lrrc53	2	complement(11083311..11101329)	ENSDARG00000097415	4.82003	2.26904	0.327175	2.82965	1.50062	0.860084	-1.7034	-0.768418	0.821071	0.12917	0	0	0.0370906	0	0.0669539	0.513846	0.0945512	0	0.0370041	0.273175	0.130887
cryz	2	complement(11100613..11120220)	ENSDARG00000016074	1.04385	0.0619145	0.949998	-1.05261	-0.0739727	0.98442	-1.09877	-0.135887	0.866601	3.40674	2.68672	2.10195	3.17357	2.66028	2.67957	2.29103	1.76879	3.21178	1.80437	2.40557	2.81481
tyw3	2	11119315..11126221	ENSDARG00000038222	-1.7774	-0.829768	0.243832	-1.08813	-0.121854	0.981318	1.63344	0.707915	0.374061	3.83482	4.24987	3.10876	3.30346	1.74197	1.67716	1.02679	1.87137	4.5061	2.12851	2.46198	3.58222
lhx8a	2	11205795..11210168	ENSDARG00000002330	-3.19614	-1.67633	0.0563709	-1.15833	-0.212049	0.970161	2.75926	1.46428	0.1112	1.32018	1.50487	1.18606	1.0831	0.383804	0.342152	0.173135	0.322121	1.21886	1.5128	1.02563	0.334433
slc44a5a	2	complement(11216814..11468654)	ENSDARG00000017398	3.35035	1.74431	0.623265	-1.02974	-0.042284	0.995172	-3.45	-1.7866	0.628352	0.0471557	0	0	0	0.0411273	0.036664	0.0432896	0.0345175	0	0	0	0.0358369
sdr16c5a	2	complement(11483072..11504778)	ENSDARG00000016233	-1.35511	-0.438408	0.5862	-1.2975	-0.375733	0.878249	1.0444	0.0626749	0.976879	8.17978	7.8967	6.43013	7.67272	4.86174	6.78384	3.3374	2.79418	9.77183	3.74929	3.18521	5.80196
penka	2	complement(11508691..11512819)	ENSDARG00000004869	1.52029	0.604345	0.660845	-1.09966	-0.13706	0.990175	-1.6718	-0.741405	0.588518	0.579496	0.440377	1.36663	0.855771	0.722019	0.965493	1.29196	0.787773	0.583659	0.355739	1.05047	0.692056
impad1	2	complement(11633253..11648731)	ENSDARG00000058114	1.14494	0.19527	0.826727	1.04026	0.0569453	0.995172	-1.10063	-0.138325	0.891093	7.30342	5.38524	6.90653	5.97999	5.10842	5.11625	6.90379	5.61069	5.35305	4.97169	6.16078	8.13323
zgc:110130	2	complement(11651176..11662923)	ENSDARG00000039203	-1.37425	-0.458646	0.647995	-1.09887	-0.13602	0.979863	1.25061	0.322627	0.801934	3.51895	1.96686	2.70612	2.70187	1.46783	1.9628	1.82591	0.951941	3.03379	2.76131	1.24805	2.15107
ftr01	2	11670270..11677705	ENSDARG00000003909	#N/A	#N/A	#N/A	#N/A	#N/A	#N/A	#N/A	#N/A	#N/A	0	0	0	0	0	0	0	0	0	0	0	0
greb1l	2	11685742..11833356	ENSDARG00000039196	-1.15497	-0.207852	0.898647	1.0545	0.0765599	0.995172	1.21791	0.284412	0.86417	0.706915	0.174094	0.555706	0.135325	0.182679	0.203568	0.468691	0.172485	0.646068	0.326272	0.308496	0.208924
abhd3	2	complement(11848510..11912347)	ENSDARG00000018809	1.35656	0.439948	0.377369	-1.2181	-0.284629	0.872221	-1.65242	-0.724577	0.0507507	2.49944	1.86342	1.92574	1.59037	2.10559	2.15313	2.30755	1.77759	1.73965	1.59886	1.27429	1.41383
ro60	2	11923615..11945936	ENSDARG00000089225	1.02062	0.0294466	0.969314	1.01682	0.0240636	0.995172	-1.00374	-0.00538292	0.995019	3.24181	2.52363	3.16995	2.58828	2.31017	2.12094	2.43163	2.25722	2.8918	2.17452	2.97409	2.85426
cdc73	2	11946554..12003175	ENSDARG00000020201	1.03514	0.0498315	0.963464	1.02377	0.0338849	0.995172	-1.01111	-0.0159466	0.98282	10.8112	7.09291	6.88392	9.68566	7.39238	7.76693	7.06645	5.7928	10.7473	6.65265	7.83907	7.9861
kcnt2	2	complement(12019341..12079718)	ENSDARG00000075812	-1.70432	-0.769199	0.525921	1.10699	0.146642	0.984062	1.88667	0.915841	0.414608	0.744818	0.43066	0.496404	0.390548	0.112974	0.302141	0.17837	0.308156	0.28539	0.640117	0.616374	0.541429
gpr158b	2	complement(12104389..12243213)	ENSDARG00000079665	-1.27329	-0.348557	0.753911	1.05717	0.0802007	0.995015	1.34607	0.428758	0.703079	0.532684	0.47227	0.536196	0.537219	0.158639	0.606098	0.214688	0.294817	0.595396	0.480135	0.329721	0.661541
prtfdc1	2	12255568..12280508	ENSDARG00000011683	1.15099	0.20287	0.842511	-1.10618	-0.145586	0.97254	-1.2732	-0.348456	0.743013	3.40984	3.16053	3.10692	2.75934	2.07274	5.18186	2.08685	2.00434	3.73354	2.08688	2.2945	2.51285
arhgap21b	2	12302527..12406641	ENSDARG00000075673	-1.32938	-0.41075	0.399993	-1.29688	-0.375048	0.727283	1.02506	0.035702	0.982173	8.10578	4.60161	6.81901	6.37544	3.67449	4.13512	4.47061	2.90805	5.50587	4.03386	4.47196	4.49228
dpp6b	2	complement(12406713..12632761)	ENSDARG00000024744	1.47555	0.561255	0.502522	-1.06279	-0.0878564	0.990916	-1.5682	-0.649111	0.414608	2.80938	1.67855	3.78078	2.70947	2.98289	6.36301	1.65395	1.85526	3.28321	2.17826	1.60529	2.59918
kmt2cb	2	12847602..13037544	ENSDARG00000075560	-1.22651	-0.294562	0.587332	1.0361	0.051163	0.991771	1.27079	0.345725	0.510877	2.49863	1.91373	2.28336	1.59638	1.15619	1.33831	1.49096	1.2498	2.14084	1.77757	1.91239	2.1257
BX324233.1	2	13050225..13051517	ENSDARG00000114675	-1.5492	-0.631527	0.79679	1.13999	0.189025	0.990175	1.76608	0.820552	0.728427	0.275822	0.0815134	0.867297	0.396006	0.240561	0.14297	0	0.336499	0.243078	0.316066	0.583323	0.489106
prkag2b	2	13056802..13148453	ENSDARG00000001933	1.68207	0.750234	0.325809	1.41148	0.497205	0.854523	-1.19171	-0.253029	0.842455	3.34199	2.21046	1.50123	2.46765	1.66557	2.72217	4.18806	3.76653	2.618	2.73543	4.37531	2.62044
bcl2b	2	complement(13185302..13216269)	ENSDARG00000089109	1.12362	0.16815	0.892985	-1.6217	-0.697504	0.668726	-1.82217	-0.865654	0.250789	1.65727	2.30892	1.22136	1.60609	1.49703	2.87621	0.869369	0.953154	0.860668	0.864755	1.07292	1.16951
kdsr	2	complement(13223755..13254821)	ENSDARG00000012021	-1.22836	-0.296737	0.676823	-1.02107	-0.0300753	0.995172	1.20302	0.266662	0.743092	6.55007	3.69549	5.21589	4.47001	3.37569	3.04241	3.78744	2.42843	5.2852	3.58229	5.24284	3.97582
vps4b	2	complement(13255986..13333991)	ENSDARG00000069175	-1.21025	-0.275306	0.729492	-1.3151	-0.395173	0.82942	-1.08663	-0.119867	0.909073	66.4396	54.8021	37.0727	48.6145	32.8706	43.9703	33.9452	24.3745	51.0242	30.6913	28.7113	38.2297
si:dkey-185p13.1	2	complement(13298051..13333932)	ENSDARG00000095837	1.00725	0.010425	0.994033	-1.54112	-0.623983	0.89689	-1.5523	-0.634408	0.695106	1.90818	1.69176	0.900012	2.9588	1.33139	2.22544	1.22621	1.25709	2.01798	0.81997	1.0377	0.870094
nmur1b	2	complement(13376099..13382726)	ENSDARG00000003944	#N/A	#N/A	#N/A	#N/A	#N/A	#N/A	#N/A	#N/A	#N/A	0	0	0	0	0	0	0	0	0	0	0	0
cfap57	2	13462305..13673494	ENSDARG00000058090	1.1266	0.171973	0.969314	2.24878	1.16914	0.93592	1.99608	0.997167	0.84554	0	0	0.0442897	0	0	0	0	0.027494	0	0.0322807	0.0680872	0
CABZ01044235.1	2	complement(13688624..13691834)	ENSDARG00000110105	-1.22439	-0.292063	0.863714	1.49334	0.578543	0.901892	1.82843	0.870607	0.509897	0.456205	0.134822	0.627591	0.327494	0.198942	0.118235	0.314102	0.30611	0.603071	0.588113	0.51686	0.375594
ebna1bp2	2	13694450..13721149	ENSDARG00000054980	1.30206	0.3808	0.476772	-1.30529	-0.384372	0.74717	-1.69957	-0.765172	0.0333291	3.69919	4.1352	4.19935	3.81999	4.74925	4.62685	3.83885	3.12823	3.46253	1.93516	2.56146	3.56211
zbtb41	2	13721888..13800596	ENSDARG00000054984	-1.05114	-0.0719524	0.968007	-1.02978	-0.0423353	0.995172	1.02074	0.0296171	0.982173	1.94516	0.829113	1.49969	1.19228	0.978747	1.07612	1.0302	0.903592	1.28568	0.93231	1.5257	1.16556
CABZ01042417.1	2	complement(13885155..13886842)	ENSDARG00000109226	1.22408	0.291702	0.969314	5.11249	2.35403	0.901892	4.17659	2.06233	0.766258	0	0	0	0	0	0	0	0	0.124131	0	0	0
cpdp	2	13907452..13940917	ENSDARG00000099519	1.05475	0.0769045	0.934553	1.15402	0.206674	0.93592	1.09412	0.129769	0.880631	9.13995	8.90302	6.16864	6.11232	6.13596	6.45186	7.39698	5.28186	10.6516	6.92491	7.63011	7.86004
tctex1d1	2	complement(14207559..14272083)	ENSDARG00000103545	1.54829	0.630678	0.871126	-1.73535	-0.795223	0.961948	-2.68682	-1.4259	0.756499	0	0	0.103299	0.0754659	0	0	0.160845	0.0641257	0	0	0	0.0665769
sgip1b	2	complement(14276639..14390627)	ENSDARG00000101215	1.03381	0.0479709	0.969314	1.36167	0.445382	0.903497	1.31714	0.397411	0.781016	0.513566	0.356338	0.658231	0.34623	0.545285	0.225693	0.532956	0.21248	0.452599	0.383803	0.870241	0.627866
pde4bb	2	complement(14444276..14587224)	ENSDARG00000074233	1.14928	0.200735	0.931207	1.93816	0.954691	0.805602	1.68641	0.753955	0.682127	0.712463	0.090237	1.02012	1.359	1.19838	0.118703	0.934358	0.558767	0.852127	0.349891	1.6605	2.97798
CABZ01026681.1	2	complement(14655134..14656669)	ENSDARG00000115547	-1.10851	-0.148619	0.851289	-1.0952	-0.131192	0.963801	1.01215	0.0174266	0.983597	14.7825	8.71445	10.3125	9.26733	7.49264	9.74846	8.45497	4.75883	10.2311	5.25475	8.90885	12.293
si:ch73-366i20.1	2	complement(14790294..14798305)	ENSDARG00000092949	-1.48408	-0.569573	0.696062	1.16243	0.217138	0.974307	1.72514	0.786711	0.567238	1.90484	0.844403	0.66362	0.708572	0.717392	0.0336598	0.47691	0.792231	1.41164	0.706918	1.37334	0.888314
hccsa.2	2	complement(14982383..14987282)	ENSDARG00000095776	15.48	3.95233	0.462346	7.5095	2.90872	0.870801	-2.06139	-1.04362	0.803228	0	0	0	0	0	0.212482	0	1.00021	0	0.469739	0.247697	0
pimr55	2	14992879..14995050	ENSDARG00000057769	-1.47957	-0.565183	0.859869	-2.94304	-1.55731	0.849827	-1.98911	-0.992126	0.806011	0.0859577	0	0.608143	0.296189	0	0.133666	0	0.314601	0	0.0738744	0	0.195976
hccsa.1	2	complement(14998612..15033163)	ENSDARG00000028131	1.45695	0.542955	0.464902	-1.01493	-0.0213754	0.995172	-1.4787	-0.56433	0.45533	4.62666	3.13342	7.27405	6.36586	6.55718	4.64647	7.43284	5.59741	4.81361	3.09266	6.87258	4.83467
si:dkey-10f21.4	2	complement(15035090..15041846)	ENSDARG00000057743	1.3436	0.426104	0.842511	1.09598	0.132218	0.995172	-1.22594	-0.293886	0.912822	0.108318	0.288101	0	0.419893	0.236178	0.168437	0.248595	0.277508	0.286379	0.0465459	0.294528	0.288116
cnn3b	2	15048410..15075295	ENSDARG00000029856	1.26759	0.342085	0.540746	1.18562	0.245636	0.901892	-1.06914	-0.0964489	0.911977	16.9214	14.0974	11.7184	15.4097	14.8987	16.289	15.4354	11.5605	19.7414	17.2204	13.1946	14.3703
f3b	2	15100742..15106968	ENSDARG00000005673	1.03898	0.0551688	0.969314	1.2322	0.301236	0.935711	1.18597	0.246067	0.827437	4.04173	3.03804	4.24779	4.61703	3.52503	3.00585	2.66178	3.60166	4.18138	3.09601	5.33564	5.74254
abcd3b	2	complement(15109528..15125512)	ENSDARG00000002947	1.27948	0.355557	0.645887	-1.2715	-0.346536	0.884471	-1.62686	-0.702093	0.202155	5.52349	3.74999	5.04613	5.05821	3.99278	3.94636	6.76086	4.62594	4.25382	2.9081	2.97671	4.08424
arhgap29b	2	15128027..15198117	ENSDARG00000017748	-1.43273	-0.518763	0.193573	1.05756	0.0807414	0.978326	1.5152	0.599504	0.0939224	7.4541	4.37603	5.28559	5.20641	3.16273	2.8456	3.17489	2.87563	6.2141	4.41512	5.21926	6.07317
abca4b	2	15203322..15294707	ENSDARG00000062661	1.1344	0.181935	0.969314	1.75203	0.809029	0.93592	1.54445	0.627093	0.86417	0.0468029	0.0138316	0	0.0134393	0.0136066	0	0.0143219	0.0342593	0.0137489	0.0268158	0.084841	0
tecrl2b	2	complement(15300088..15324837)	ENSDARG00000039979	1.50669	0.591387	0.352757	1.66551	0.735962	0.323421	1.1054	0.144575	0.89033	5.43701	6.38374	7.62396	4.55706	6.40803	5.82685	5.80064	9.6269	6.47508	8.33511	10.7215	11.6142
olfm3b	2	complement(15341689..15362923)	ENSDARG00000039174	-1.36311	-0.446902	0.842511	-1.88242	-0.912589	0.88224	-1.38098	-0.465688	0.86417	0.0687761	0.121952	0.243292	0.177739	0.0299919	0.026737	0.189412	0.100687	0.0606114	0.0591081	0.124672	0.0522677
col11a1b	2	complement(15389193..15563194)	ENSDARG00000009014	1.68388	0.751793	0.20784	1.51047	0.595	0.618721	-1.11481	-0.156793	0.886863	19.6149	9.30957	9.87231	9.38321	17.7667	12.7035	17.377	13.7738	17.7922	21.6345	15.1261	10.1613
BX510342.1	2	15586632..15589991	ENSDARG00000099759	#N/A	#N/A	#N/A	#N/A	#N/A	#N/A	#N/A	#N/A	#N/A	0	0	0	0	0	0	0	0	0	0	0	0
amy2a	2	15612755..15626972	ENSDARG00000013856	-1.4957	-0.580818	0.90725	2.0926	1.0653	0.91944	3.1299	1.64611	0.664192	0.0736552	0	0	0.0634494	0	0.0572676	0	0	0.129823	0.0633013	0.0667584	0.0559757
vav3b_1	2	15776156..15945153	ENSDARG00000073713	1.7481	0.80579	0.688822	-1.16846	-0.224614	0.98775	-2.0426	-1.0304	0.611836	0.0240403	0	0.141736	0.103546	0.104835	0.112149	0.0662081	0.0703892	0.0423728	0.0619828	0.0435786	0.0548098
vav3b_2	2	complement(15993389..16159491)	ENSDARG00000075962	-1.00613	-0.00881269	0.992675	-1.45617	-0.542178	0.854796	-1.4473	-0.533365	0.638916	1.0425	0.462131	1.10634	1.13753	0.666765	0.864588	0.765622	0.585042	0.826865	0.41811	0.377953	0.739449
selenoj	2	16160906..16172257	ENSDARG00000087277	1.27349	0.348786	0.574639	1.21409	0.279878	0.89689	-1.04892	-0.0689076	0.956146	33.9413	36.3359	23.9131	30.9926	30.7124	36.2198	26.4069	31.8012	31.0337	34.5666	27.2254	50.4925
sh3glb1b	2	16173999..16210623	ENSDARG00000010956	1.0896	0.123805	0.854182	1.04866	0.0685499	0.984838	-1.03904	-0.0552549	0.964598	27.4337	34.5948	24.8128	24.3933	25.1048	25.3293	22.2273	23.0097	32.0528	27.2389	21.6626	29.6543
arhgef4	2	complement(16198735..16359042)	ENSDARG00000012914	-1.50026	-0.585212	0.146898	-1.36523	-0.449143	0.556444	1.09891	0.136069	0.86417	9.21199	6.25123	7.49207	7.58382	3.72619	4.66137	4.57121	3.0107	7.66201	3.80018	4.88328	4.70002
si:dkey-231j24.3	2	complement(16365768..16380283)	ENSDARG00000095819	2.61147	1.38486	0.752219	2.25052	1.17026	0.93592	-1.16039	-0.214605	0.98055	0.0361996	0	0	0	0	0	0.0996952	0	0	0.0311109	0.03281	0.0275106
atr	2	complement(16384285..16449504)	ENSDARG00000079625	-1.14363	-0.193624	0.842511	-1.34579	-0.428449	0.836332	-1.17676	-0.234825	0.822222	1.39317	0.725821	1.28711	0.841331	0.714011	0.737027	0.685625	0.693878	0.873373	0.493745	0.885208	0.65491
zgc:110269	2	16449627..16458472	ENSDARG00000012325	-1.37315	-0.457491	0.690413	1.02839	0.0403869	0.995172	1.41213	0.497878	0.689733	5.1509	4.20427	1.63893	2.25381	2.78102	2.54278	1.27597	1.01741	4.53941	3.44309	1.40799	3.41744
agfg1b	2	16460321..16479291	ENSDARG00000019526	-1.02332	-0.0332627	0.969314	1.04457	0.0629151	0.991841	1.06894	0.0961777	0.932749	5.96843	4.90117	4.67256	5.14144	4.30941	3.76566	4.17669	3.61682	6.85511	4.91921	4.12369	4.46147
fbxo36b	2	16482338..16485408	ENSDARG00000039152	-1.26907	-0.343771	0.949572	-2.44087	-1.28739	0.93592	-1.92335	-0.943623	0.86417	0	0.108881	0.289622	0	0.214219	0	0	0	0	0	0.11131	0
CR377211.1	2	16487443..16488660	ENSDARG00000079364	8.2857	3.05062	0.593824	5.11262	2.35406	0.901892	-1.62064	-0.696561	0.86417	0	0	0	0	0	0.0848759	0.100214	0.0799069	0	0	0.0989422	0.0829613
grk7a	2	16536453..16544343	ENSDARG00000020602	1.09657	0.132993	0.969314	-1.35873	-0.442261	0.978968	-1.48994	-0.575254	0.887934	0.0351819	0.0935751	0	0	0.0306842	0	0.0645948	0.0257528	0	0.0302362	0.0318875	0.0267371
atp1b3a	2	complement(16547706..16565690)	ENSDARG00000015790	-1.08682	-0.120112	0.89788	1.12857	0.174492	0.941781	1.22655	0.294604	0.730243	16.5066	10.6303	9.38317	7.96655	6.14307	13.5029	9.08208	3.81764	16.395	8.41005	10.5263	11.5638
si:dkeyp-13a3.10	2	16585549..16595596	ENSDARG00000092225	-1.99213	-0.99431	0.173343	1.09023	0.124637	0.982781	2.17188	1.11895	0.0915533	4.3824	6.00019	2.55105	8.745	3.77377	2.54473	1.93516	0.690302	8.35983	4.48148	4.12288	6.11292
xrn1	2	16597011..16647259	ENSDARG00000091652	-1.09673	-0.133214	0.845489	-1.1465	-0.197236	0.93592	-1.04538	-0.0640216	0.956251	8.48345	5.50139	6.53052	6.58994	5.13725	5.2134	4.93122	3.97265	7.83547	4.37773	4.48251	5.47587
gk5	2	16652238..16694635	ENSDARG00000062864	1.63118	0.705915	0.193299	-1.13307	-0.180241	0.94389	-1.84824	-0.886155	0.0575136	2.69491	2.75943	2.99868	3.00813	4.56836	2.95115	4.11165	3.11178	2.91019	1.76152	2.54577	2.3365
ppp1r7	2	16696052..16707806	ENSDARG00000009740	1.4386	0.524663	0.183603	1.3656	0.449532	0.495864	-1.05346	-0.075131	0.934723	22.0692	16.0878	21.5123	21.7151	20.7877	24.7852	27.1482	19.0622	27.4019	21.833	26.3592	27.9905
ubxn7	2	16710883..16737363	ENSDARG00000009436	-1.08403	-0.116406	0.868985	-1.01958	-0.0279729	0.995172	1.06322	0.0884335	0.92313	11.8879	8.9144	8.51542	12.8248	7.21898	9.41575	8.15948	5.93678	12.7287	9.83489	6.94824	9.37222
tfa	2	16780643..16794710	ENSDARG00000016771	-1.46219	-0.548128	0.759557	-1.24692	-0.318368	0.961722	1.17264	0.22976	0.929626	0.481099	0.234594	0.368737	0.393715	0.125879	0.299247	0.0441655	0.281728	0.529982	0.0206735	0.109013	0.493588
eif4g1a	2	16798652..16842699	ENSDARG00000006200	1.58295	0.662617	0.198991	-1.04344	-0.0613478	0.993348	-1.65171	-0.723964	0.131448	12.4946	9.45365	14.2791	10.7131	16.4731	15.411	16.5252	10.0597	11.9983	8.1514	11.2506	10.5594
fam131a	2	16846772..16867937	ENSDARG00000077022	1.29195	0.369555	0.904066	1.46722	0.553086	0.942782	1.13566	0.183531	0.97481	0.127485	0	0.300648	0.38437	0.500342	0	0.117033	0.186635	0.11235	0.0547819	0.693285	0.242211
clcn2a	2	complement(16885285..17044959)	ENSDARG00000062427	-1.26727	-0.341721	0.842511	-1.1748	-0.232418	0.971713	1.07871	0.109303	0.975134	0.421808	0.218148	0.538823	0.454201	0.153285	0.13665	0.25815	0.411679	0.309778	0.181257	0.382311	0.400701
thpo	2	17055069..17072559	ENSDARG00000079158	-4.37192	-2.12827	0.730154	-1.73524	-0.795132	0.961394	2.5195	1.33314	0.86417	0	0.182981	0	0.17779	0	0	0	0	0.181887	0	0	0
pif1	2	complement(17096161..17115256)	ENSDARG00000020289	-3.42554	-1.77633	0.302704	1.0717	0.0998976	0.995172	3.67114	1.87623	0.255593	0.157082	0.139266	0.111134	0.189443	0.1096	0	0.0288406	0	0.276868	0.0810002	0.113899	0.143253
ptger4c	2	17181777..17186371	ENSDARG00000079907	16.1502	4.01348	0.462936	1.0567	0.0795596	0.995172	-15.2837	-3.93392	0.460236	0	0	0	0	0	0.403876	0	0	0	0	0	0
artnb	2	complement(17200320..17235891)	ENSDARG00000093714	5.93174	2.56845	0.678796	1.0556	0.0780585	0.995172	-5.61932	-2.4904	0.695106	0	0	0	0	0	0.163304	0	0.153743	0	0	0	0
st3gal3b	2	complement(17266759..17393971)	ENSDARG00000015252	1.20017	0.263241	0.842511	1.18553	0.245536	0.954185	-1.01235	-0.0177048	0.98933	0.466957	0.551996	0.504729	0.536339	0.509077	0.423574	0.607287	0.42726	0.514403	0.635417	0.493772	0.650601
kdm4ab	2	complement(17450228..17492486)	ENSDARG00000019103	-1.4388	-0.524869	0.199481	-1.03608	-0.0511397	0.991841	1.38869	0.473729	0.271059	6.98996	4.75341	5.14031	4.57541	2.64394	3.17515	3.33494	2.47577	6.0056	4.34942	4.1328	4.81712
BX640408.1	2	17451656..17452724	ENSDARG00000104683	-2.71866	-1.4429	0.744119	-1.01245	-0.0178448	0.99734	2.68524	1.42505	0.773439	0	0.0985938	0.131129	0.191595	0	0	0.102089	0	0	0.382295	0	0
pimr199	2	17508323..17511179	ENSDARG00000104972	#N/A	#N/A	#N/A	#N/A	#N/A	#N/A	#N/A	#N/A	#N/A	0	0	0	0	0	0	0	0	0	0	0	0
pimr196_1	2	17524278..17575605	ENSDARG00000052319	-2.59436	-1.37538	0.843027	1.61006	0.687112	0.970161	4.17707	2.06249	0.767987	0.0304897	0	0	0	0	0	0	0	0	0.0524074	0	0
pimr198_1	2	17540720..17542659	ENSDARG00000052296	#N/A	#N/A	#N/A	#N/A	#N/A	#N/A	#N/A	#N/A	#N/A	0	0	0	0	0	0	0	0	0	0	0	0
pimr197	2	17556177..17559123	ENSDARG00000100970	#N/A	#N/A	#N/A	#N/A	#N/A	#N/A	#N/A	#N/A	#N/A	0	0	0	0	0	0	0	0	0	0	0	0
pimr196_2	2	17569644..17575580	ENSDARG00000026569	#N/A	#N/A	#N/A	#N/A	#N/A	#N/A	#N/A	#N/A	#N/A	0	0	0	0	0	0	0	0	0	0	0	0
ptprfb	2	complement(17578320..17947389)	ENSDARG00000005754	-1.83414	-0.875104	0.0696641	-1.44118	-0.527246	0.653878	1.27267	0.347858	0.683201	24.7045	22.8809	14.261	20.8863	8.17358	11.7431	9.14265	6.75506	18.9176	12.4385	9.62407	13.4276
BX511224.1	2	18017000..18022765	ENSDARG00000113243	-2.09748	-1.06866	0.821238	2.28893	1.19467	0.901892	4.80099	2.26333	0.521519	0.0412346	0.018279	0	0	0.0179816	0	0	0	0.0908488	0.0177191	0	0.0313371
pbx1a	2	complement(18698388..18830794)	ENSDARG00000100494	1.54842	0.630801	0.253482	1.04041	0.0571493	0.995172	-1.48829	-0.573652	0.330429	2.36243	1.98508	4.80215	2.46033	3.73643	3.42688	3.28548	3.47145	2.73453	3.84855	1.96545	2.49209
glula	2	18988407..18992350	ENSDARG00000099776	-1.36586	-0.449815	0.535425	1.29589	0.373944	0.869916	1.77001	0.823758	0.104297	19.0304	22.2647	44.2402	19.4543	14.4966	14.1407	13.8766	17.104	23.9892	29.398	23.4709	51.351
TMEM275	2	complement(19100422..19109304)	ENSDARG00000104930	-3.32322	-1.73258	0.652366	2.1471	1.10239	0.890074	7.13529	2.83497	0.318117	0.0235033	0	0.0554278	0.0404932	0	0	0	0.0172042	0.103565	0.100997	0.0213025	0.0178618
BX323588.2	2	19104231..19144467	ENSDARG00000111227	#N/A	#N/A	#N/A	#N/A	#N/A	#N/A	#N/A	#N/A	#N/A	0	0	0	0	0	0	0	0	0	0	0	0
kncn	2	complement(19119847..19128385)	ENSDARG00000101899	#N/A	#N/A	#N/A	#N/A	#N/A	#N/A	#N/A	#N/A	#N/A	0	0	0	0	0	0	0	0	0	0	0	0
elovl1a	2	19163965..19215112	ENSDARG00000099960	1.53372	0.617036	0.443434	1.3609	0.444565	0.870801	-1.12699	-0.172471	0.888558	3.04097	3.69463	2.85533	2.52259	3.5854	6.74287	2.73996	1.97863	6.65029	3.29107	2.55206	3.38098
cdc20	2	complement(19217586..19234469)	ENSDARG00000100741	-1.87819	-0.909345	0.29065	1.14435	0.194532	0.969484	2.14931	1.10388	0.144257	2.5595	2.95808	1.02398	2.36234	1.35532	0.710726	1.17483	0.568749	4.47102	1.76762	1.11849	2.63983
cc2d1b	2	19236677..19274665	ENSDARG00000099445	-1.26079	-0.334331	0.562147	1.04087	0.0577868	0.990721	1.31232	0.392118	0.480376	5.6397	3.91759	3.93062	4.87495	2.4002	2.89314	2.52639	3.36215	5.12391	4.23064	3.44288	5.05189
zfyve9a	2	complement(19280829..19354622)	ENSDARG00000101903	1.05349	0.0751728	0.925728	1.11572	0.157979	0.93592	1.05908	0.082806	0.930947	6.52472	4.90265	7.25712	7.13542	4.78253	5.95451	5.69242	4.82684	6.17835	6.44269	7.67532	6.31253
pimr141	2	19505263..19508136	ENSDARG00000057253	15.6479	3.9679	0.443993	1.056	0.0786068	0.995172	-14.8181	-3.88929	0.435489	0	0	0	0	0	0	0.158508	0.252777	0	0	0	0
pimr52	2	complement(19518520..19520690)	ENSDARG00000057265	2.60904	1.38352	0.730154	-3.0085	-1.58904	0.93592	-7.84929	-2.97256	0.602282	0	0	0	0.0735156	0	0.0663531	0	0.124937	0	0	0	0
pimr49_1	2	19522082..19524247	ENSDARG00000092075	-7.58489	-2.92313	0.608077	-8.79134	-3.13608	0.833393	-1.15906	-0.212954	0.982173	0.346083	0	0	0	0	0	0	0	0	0	0	0
pimr140	2	19559047..19563419	ENSDARG00000077665	2.60889	1.38344	0.735398	2.24853	1.16898	0.93592	-1.16027	-0.214457	0.977711	0	0	0.103835	0	0.0768015	0.0684666	0.0808393	0	0.15521	0	0.0798134	0
pimr51	2	complement(19574496..19630297)	ENSDARG00000069033	-16.7006	-4.06183	0.397201	-6.67739	-2.73928	0.653111	2.50107	1.32254	0.872874	0.461369	0	0.272012	0	0	0	0	0	0.0677664	0	0	0
pimr50	2	19578079..19580242	ENSDARG00000095093	8.28616	3.0507	0.593824	1.0556	0.0780585	0.995172	-7.84974	-2.97264	0.602282	0	0	0	0	0.0746988	0	0.157252	0	0	0	0	0
pimr49_2	2	complement(19628134..19630297)	ENSDARG00000093408	#N/A	#N/A	#N/A	#N/A	#N/A	#N/A	#N/A	#N/A	#N/A	0	0	0	0	0	0	0	0	0	0	0	0
pimr54	2	19633493..19635654	ENSDARG00000057284	#N/A	#N/A	#N/A	#N/A	#N/A	#N/A	#N/A	#N/A	#N/A	0	0	0	0	0	0	0	0	0	0	0	0
ptbp2b	2	19777146..19795593	ENSDARG00000015901	1.4333	0.519345	0.28539	1.22875	0.297196	0.870801	-1.16647	-0.222148	0.773097	4.71419	4.83371	6.67049	5.54412	7.00747	5.45018	7.56405	4.62099	6.24988	5.3198	6.76212	6.66682
dpydb	2	complement(19824190..20120904)	ENSDARG00000010267	-1.81926	-0.863348	0.659404	-1.01973	-0.0281838	0.995172	1.78406	0.835164	0.695106	0.15459	0.0391591	0.234366	0.114145	0.096305	0.0515121	0.0608209	0.0161654	0.0194625	0.170818	0.140114	0.134267
plppr5a	2	complement(20262479..20323901)	ENSDARG00000057209	-1.2207	-0.287712	0.887613	-1.21903	-0.285736	0.969484	1.00137	0.00197563	0.999291	0.281039	0.28476	0.142023	0.207512	0.140063	0.156079	0.11057	0.176329	0.283058	0.241533	0.0363891	0.152558
plppr4a	2	20331445..20371803	ENSDARG00000079671	1.01134	0.016271	0.992627	1.3874	0.47238	0.93592	1.37184	0.456109	0.852268	0.0420812	0.0373086	0.173671	0.0543755	0.0550524	0.0490778	0.0579467	0.0616061	0.0741712	0.12658	0.0762818	0.0959414
palmda	2	20406399..20428140	ENSDARG00000001913	2.49465	1.31884	0.00314389	1.46467	0.55058	0.692284	-1.70321	-0.768257	0.179146	5.96986	2.14682	3.25032	6.5464	8.5007	8.60832	6.65479	10.0552	3.22112	5.54949	5.963	9.15485
si:ch211-153l6.6	2	20430366..20443258	ENSDARG00000097187	3.74693	1.90571	0.49699	2.0927	1.06537	0.93592	-1.79047	-0.840341	0.794989	0.0393902	0	0.046447	0	0.0343545	0.153131	0.0361607	0.0288332	0	0.067706	0.0714036	0.0299353
frrs1a	2	complement(20444477..20470140)	ENSDARG00000076183	-1.26888	-0.343556	0.942445	-7.13063	-2.83403	0.857901	-5.61962	-2.49047	0.697611	0.135244	0.0599527	0	0	0.0589772	0	0	0.0494986	0	0	0	0
agla	2	20472150..20526830	ENSDARG00000103811	1.39461	0.479863	0.463748	1.01327	0.019022	0.995172	-1.37634	-0.460841	0.509809	37.7301	21.4667	37.2446	33.894	36.1617	24.8414	40.5906	37.3127	26.0513	30.8813	35.5585	27.4632
si:ch73-14h1.2	2	20539402..20555743	ENSDARG00000060622	2.33953	1.22622	0.491218	1.30911	0.388589	0.964097	-1.78711	-0.837631	0.695106	0.0410071	0.145425	0.338475	0.035325	0.357647	0.0318834	0.414096	0.210117	0.252973	0.211456	0.111502	0.0934924
si:ch211-267e7.3	2	complement(20555394..20599315)	ENSDARG00000075487	1.90042	0.926316	0.477094	1.70711	0.771558	0.843982	-1.11323	-0.154758	0.95244	0.0955879	0.25424	0.45085	0.247029	0.611365	0.272508	0.380254	0.303201	0.252721	0.629823	0.462066	0.290576
olfml2bb	2	20604775..20615639	ENSDARG00000021480	1.68313	0.751147	0.126777	-2.28798	-1.19407	0.00401473	-3.85097	-1.94522	5.679e-09	3.98965	2.7659	3.99697	4.8064	6.30516	4.01159	6.16851	4.04023	1.05745	1.7273	1.68569	1.77817
dusp12	2	complement(20658259..20715094)	ENSDARG00000076330	1.2476	0.319161	0.735398	-1.07258	-0.101079	0.985745	-1.33815	-0.42024	0.66228	1.15157	0.997221	0.852619	0.876656	1.00435	1.10358	0.934232	0.764525	0.896855	0.506353	0.922376	1.05833
CABZ01020455.1	2	complement(20763289..20788698)	ENSDARG00000110856	#N/A	#N/A	#N/A	#N/A	#N/A	#N/A	#N/A	#N/A	#N/A	0	0	0	0	0	0	0	0	0	0	0	0
prg4a	2	20793982..20812059	ENSDARG00000010482	1.15232	0.204536	0.924849	3.21063	1.68286	0.196482	2.78624	1.47832	0.194826	4.8765	4.74523	70.3339	46.5162	48.5474	2.49686	42.6923	20.8514	103.771	85.6087	97.399	96.4009
tpra	2	complement(20811677..20866758)	ENSDARG00000103004	-1.01866	-0.026679	0.969314	-1.00882	-0.0126702	0.995172	1.00976	0.0140087	0.98416	5.62542	3.57886	5.50538	4.41302	2.99749	4.42423	4.12244	3.06161	5.75767	4.11014	3.48238	4.26283
odr4	2	20866898..20879820	ENSDARG00000042671	1.0477	0.0672287	0.961337	1.12714	0.172669	0.952789	1.07582	0.105441	0.934718	5.91192	4.54678	6.55111	5.82905	5.96373	4.70733	3.9233	4.01464	6.7794	4.89722	7.23054	5.08832
pdca	2	complement(20882954..20890429)	ENSDARG00000011886	-1.79228	-0.841795	0.587484	-1.91626	-0.938292	0.796922	-1.06917	-0.0964969	0.982173	0.920306	0.532128	0.141545	0.241283	0.104694	0.248886	0.257129	0.175736	0.282105	0.068777	0.326399	0.212862
ptgs2a	2	complement(20916497..20923864)	ENSDARG00000004539	-1.59693	-0.675297	0.211293	-1.57414	-0.654565	0.401549	1.01447	0.0207317	0.982173	34.1326	22.511	20.0909	19.6181	8.88703	17.4037	9.91653	10.6379	25.2225	11.6764	8.47853	12.4832
pla2g4aa	2	20925899..20957362	ENSDARG00000024546	-1.49634	-0.581435	0.629521	-1.62889	-0.703891	0.800769	-1.08859	-0.122457	0.960535	5.23051	1.13899	3.6248	1.18573	1.28052	1.03453	2.06388	1.17547	1.17261	0.552048	1.78818	2.65002
arpc5a	2	20967673..20975677	ENSDARG00000039142	1.00146	0.00210455	0.997393	-1.22049	-0.287457	0.911211	-1.22227	-0.289562	0.754067	40.6538	37.9772	22.0086	31.4709	31.2586	34.6511	22.6658	16.7548	38.208	20.0587	20.3381	24.527
lyrm4	2	complement(20980162..20981907)	ENSDARG00000078352	1.37422	0.458615	0.359714	-1.16676	-0.222505	0.929731	-1.60338	-0.68112	0.0858136	40.8094	38.1473	31.1214	32.2889	43.1363	41.2141	31.9662	36.5283	27.3645	32.2135	28.5452	25.1145
nrn1b	2	complement(20991985..20994126)	ENSDARG00000042656	1.11894	0.162137	0.969314	-1.06172	-0.0864038	0.995172	-1.18801	-0.248541	0.977559	0	0	0.0783111	0.171632	0	0	0	0.194455	0	0	0.120389	0.100944
rreb1b	2	21000334..21062305	ENSDARG00000042652	-1.03101	-0.0440651	0.969314	-1.22342	-0.290924	0.866503	-1.18662	-0.246858	0.713424	8.26698	3.87649	6.77752	5.77452	4.0407	5.14437	5.63541	3.70923	5.52479	3.6582	4.00233	5.47944
riok1	2	21063660..21076570	ENSDARG00000016399	1.1245	0.169283	0.80926	-1.19932	-0.262217	0.900246	-1.34864	-0.4315	0.416477	12.1008	9.05712	9.89484	9.37642	7.79603	12.2452	10.2713	5.65287	8.09196	6.0099	7.99154	9.33486
nebl	2	complement(21076585..21082695)	ENSDARG00000021200	-3.10518	-1.63468	0.449157	1.22393	0.29152	0.979647	3.80052	1.9262	0.317616	0.0998568	0.0885315	0.588731	0.129031	0	0.0776395	0.0458349	0.0730942	0.440012	0.171639	0.362026	0.0379441
pip4k2ab	2	21090317..21156855	ENSDARG00000063544	1.51624	0.600498	0.815531	1.11634	0.158782	0.995172	-1.35822	-0.441717	0.874334	0.230924	0.0409467	0.217835	0	0.080561	0.035909	0.381584	0.0676135	0.122106	0.119077	0.12558	0.105297
bmi1b	2	complement(21164930..21170517)	ENSDARG00000013076	1.10654	0.14605	0.849157	-1.05108	-0.0718687	0.98775	-1.16305	-0.217919	0.800945	8.12952	8.30431	5.27921	6.03888	7.39851	6.54979	5.46206	4.8727	7.83934	5.82228	4.69863	6.62588
dnajc1	2	21174998..21182561	ENSDARG00000001940	1.11771	0.160541	0.843027	1.09588	0.132088	0.967692	-1.01992	-0.028453	0.982173	56.486	55.6663	75.7606	57.7222	53.5338	62.5531	47.9297	51.1075	62.8204	55.1216	62.8743	71.3181
si:dkey-29d8.3	2	21185903..21243018	ENSDARG00000091879	-1.28826	-0.36542	0.733076	1.26353	0.337455	0.933454	1.62775	0.702875	0.401244	4.61523	1.71592	2.54548	2.18024	1.688	1.21542	2.2551	1.41671	3.41132	1.66335	3.57586	4.1863
vipr1a	2	21229909..21300115	ENSDARG00000028878	-1.26484	-0.338955	0.850063	-1.23761	-0.307557	0.961722	1.022	0.0313988	0.987194	0.422758	0.187405	0.199398	0.36418	0.29497	0.0657396	0.194049	0.185673	0.223542	0.254331	0.268221	0.160642
zbtb47a	2	21309272..21321749	ENSDARG00000057751	2.53002	1.33915	0.021423	-1.0238	-0.0339366	0.995172	-2.59024	-1.37309	0.012583	0.672178	0.766213	0.981314	0.523893	1.00499	1.54299	1.85121	1.38236	0.648798	0.687724	0.841328	0.486509
klhl40a	2	complement(21326957..21335131)	ENSDARG00000039052	1.19492	0.256915	0.74137	-1.35102	-0.434048	0.78677	-1.61436	-0.690963	0.16783	42.0875	19.6368	38.5376	31.3946	27.6431	25.6668	40.6659	26.9524	14.4635	21.8239	28.5993	22.5862
hhatla	2	complement(21333529..21352101)	ENSDARG00000039051	2.36596	1.24243	0.00917479	1.67358	0.742941	0.396876	-1.41371	-0.499486	0.538319	33.4864	27.5288	17.6105	30.606	43.1137	34.3407	71.9927	51.3004	32.5993	49.3126	50.2564	33.9505
ctdsplb	2	21356242..21381406	ENSDARG00000062116	-1.02172	-0.0309992	0.969314	-1.04204	-0.0594107	0.99188	-1.01989	-0.0284115	0.982173	18.7497	8.38145	20.5296	18.7306	10.9247	11.6992	15.5491	11.8793	13.6079	12.2548	15.7802	16.8835
plcd1b	2	complement(21387902..21438492)	ENSDARG00000034080	-1.08227	-0.114066	0.889331	-1.44539	-0.531456	0.50599	-1.33551	-0.41739	0.498766	38.6104	22.7286	29.5837	29.5574	17.6212	33.7573	18.7628	16.9918	28.5508	15.819	13.2117	20.7597
afg3l2	2	21452822..21469898	ENSDARG00000062272	1.069	0.0962614	0.899685	-1.0329	-0.0466997	0.995172	-1.10417	-0.142961	0.86417	19.0854	15.7013	25.0186	18.1294	13.1664	15.6679	17.8995	17.7209	19.0017	16.9345	18.0151	15.9939
inhbab	2	21485492..21504467	ENSDARG00000024759	1.23807	0.308092	0.849528	1.00275	0.00395946	0.998416	-1.23468	-0.304133	0.867306	0.433024	0.511883	0.1702	0.248682	0.503555	0.224453	0.37102	0.253575	0.407059	0.545824	0.156991	0.175512
mplkip	2	21605547..21607784	ENSDARG00000078986	1.16733	0.22321	0.792373	-1.01212	-0.0173836	0.995172	-1.18148	-0.240594	0.791045	8.53923	8.16454	7.10756	8.00508	8.25075	7.94116	7.45486	5.76039	10.1816	5.18036	6.29795	8.08013
ralab	2	complement(21608352..21618629)	ENSDARG00000016253	-1.13722	-0.185515	0.772727	1.19288	0.25445	0.878304	1.35657	0.439964	0.325499	11.3638	10.8929	10.9274	12.0288	8.44816	7.88996	8.04543	6.90624	14.5971	8.32482	13.4543	14.7229
C2H7orf25	2	complement(21620177..21625493)	ENSDARG00000057184	2.05158	1.03674	0.0273423	-1.18789	-0.248407	0.93592	-2.43707	-1.28515	0.00189739	5.3459	6.63544	4.09736	5.18081	9.15012	11.9499	8.03621	5.96755	5.53574	4.70927	3.0889	3.65645
fbxl7	2	21634128..21734733	ENSDARG00000062251	1.19514	0.257183	0.800571	1.18797	0.2485	0.93592	-1.00604	-0.00868311	0.993541	1.75486	1.28912	1.6554	1.38213	1.39933	1.59832	1.28879	1.32124	1.72328	1.76672	1.59054	1.63848
chd7	2	complement(21765670..21820697)	ENSDARG00000075211	1.41293	0.498689	0.253482	-1.1764	-0.234378	0.901892	-1.66217	-0.733068	0.0353572	3.98419	2.06679	3.37354	2.42805	3.23457	2.97417	3.88128	2.79229	2.61473	2.19472	2.18973	2.23064
rab2a	2	complement(21821683..21847935)	ENSDARG00000020261	1.11608	0.158442	0.842511	1.04911	0.0691634	0.990175	-1.06384	-0.0892783	0.937458	93.6752	89.7043	97.7028	92.2423	92.3523	90.2972	79.1535	66.6751	102.441	75.5698	94.8952	95.1826
ca8	2	21855036..21878527	ENSDARG00000039098	-1.01755	-0.0251018	0.978795	-1.00691	-0.00993516	0.995172	1.01057	0.0151667	0.9898	3.06221	2.52099	1.35405	2.82633	1.95536	2.04077	2.50996	1.20081	2.89145	2.77274	1.68511	1.78695
tox	2	21982911..22108108	ENSDARG00000032317	-1.15159	-0.203633	0.774399	1.19463	0.256569	0.901892	1.37573	0.460202	0.370828	4.15251	2.60641	3.05486	2.29506	2.16338	2.28575	1.51808	2.07123	4.11295	3.0161	2.79778	3.46298
cyp7a1	2	complement(22150134..22152797)	ENSDARG00000069018	-1.97796	-0.984012	0.531756	-14.1359	-3.82129	1.77097e-06	-7.14672	-2.83728	0.00141479	14.7178	14.1625	127.549	161.78	49.832	54.1461	10.2158	16.6417	0.263631	8.89538	5.15152	5.86536
fam110b	2	complement(22208404..22286828)	ENSDARG00000088073	1.05779	0.0810491	0.954232	-1.05029	-0.0707901	0.994738	-1.11098	-0.151839	0.900542	2.89415	2.06051	3.20582	2.15316	2.56241	2.59117	1.65048	1.63702	2.51193	2.82649	1.70902	1.96619
selenof	2	complement(22353422..22363460)	ENSDARG00000099664	-1.01913	-0.0273348	0.969314	-1.00692	-0.00994644	0.995172	1.01213	0.0173883	0.983817	99.6417	106.271	58.4555	80.0986	74.2122	83.8964	51.057	57.862	95.203	94.4315	62.1451	67.8523
hs2st1a	2	22363824..22398790	ENSDARG00000099478	-1.15199	-0.204123	0.782195	1.19851	0.261246	0.901892	1.38067	0.465369	0.383797	5.17983	5.10952	4.20943	3.81892	3.8054	2.61235	2.97733	3.00594	5.40798	3.93032	6.13286	5.10683
zgc:56628	2	22409249..22415196	ENSDARG00000110020	2.83761	1.50467	0.212615	2.80706	1.48906	0.373068	-1.01088	-0.0156172	0.99306	0	0.0829461	0.183863	0.188051	0.24479	0.16973	0.429432	0.205448	0.219867	0.294819	0.367451	0.331801
pkn2	2	22416275..22477141	ENSDARG00000101983	-1.35781	-0.44128	0.615764	-1.28026	-0.356437	0.901892	1.06057	0.0848427	0.964368	5.19658	1.46347	3.67654	2.3436	1.51964	1.35472	2.35721	1.76767	1.77799	1.68135	2.355	3.0897
gtf2b	2	complement(22480074..22492289)	ENSDARG00000103578	-1.01114	-0.0159765	0.978982	1.06231	0.0872013	0.980553	1.07414	0.103178	0.909852	17.6583	17.4897	13.5908	14.6387	13.1455	14.3039	12.3444	9.78892	22.8547	16.192	10.0449	14.6551
lrrc8da	2	22495274..22502251	ENSDARG00000103370	1.18437	0.244125	0.695628	1.09734	0.134011	0.952109	-1.07931	-0.110114	0.891809	8.18413	5.65219	4.63008	5.0548	3.61704	6.67197	6.72335	4.74735	6.39604	4.8155	5.81827	6.9741
znf644a	2	complement(22506364..22530969)	ENSDARG00000101361	-1.16564	-0.221117	0.753006	-1.0499	-0.0702564	0.986239	1.11023	0.150861	0.86417	4.33906	2.15047	3.43213	3.25029	2.09197	2.34689	2.52359	1.81494	3.15892	2.31622	3.00454	3.1337
hfm1	2	22531185..22552063	ENSDARG00000104288	1.08295	0.114968	0.969314	-1.06855	-0.0956523	0.995172	-1.15719	-0.21062	0.956251	0.0684198	0.15165	0.201693	0.0884092	0.179019	0.0531971	0.219836	0	0.0904462	0.147005	0.124027	0.0779955
FQ377628.1	2	complement(22564928..22575851)	ENSDARG00000111969	3.39105	1.76173	0.214529	1.26961	0.34438	0.972778	-2.67095	-1.41735	0.337784	0.0634475	0.0187505	0.0748142	0.0182187	0.0737819	0.147993	0.116491	0.108367	0.111831	0.0545285	0.0191688	0.0160727
cldn18	2	complement(22566082..22569488)	ENSDARG00000103087	2.81732	1.49433	0.54422	-50.5556	-5.6598	0.278412	-142.431	-7.15412	0.038745	1.17219	1.12585	0	0	0	2.81011	0	2.14508	0	0	0	0
sept2	2	22592139..22615366	ENSDARG00000027590	1.07606	0.105756	0.89788	-1.0076	-0.0109238	0.995172	-1.08424	-0.11668	0.895537	46.6417	42.1312	40.2422	44.2325	40.7692	36.8674	37.8809	31.0375	43.0642	41.5961	33.2758	42.7556
stk25b	2	complement(22617675..22636721)	ENSDARG00000039022	1.24436	0.315409	0.579493	1.01961	0.0280111	0.995172	-1.22044	-0.287398	0.651291	25.2094	21.3094	24.6985	28.1035	23.4955	30.0253	21.1573	22.2522	24.3948	26.0731	18.9847	24.8401
bokb	2	22640215..22650435	ENSDARG00000008807	-1.31202	-0.391789	0.875391	-1.0679	-0.0947752	0.995172	1.2286	0.297013	0.928023	0.0787803	0.838145	0.928939	0.135729	0.137418	0.490019	0.216964	0.345998	0.69428	0.203118	0	0.95793
thap4	2	complement(22652981..22660232)	ENSDARG00000077323	-1.1872	-0.247557	0.735878	1.16381	0.218855	0.93592	1.38167	0.466412	0.43337	6.79311	7.96218	4.75176	6.29817	4.41841	5.68455	3.43518	3.7083	9.13222	5.59081	6.62663	7.35009
zgc:161973	2	22659787..22677019	ENSDARG00000029848	3.60692	1.85077	0.440944	4.28225	2.09837	0.552735	1.18723	0.2476	0.947829	0.128518	0	0.0757713	0	0.0560443	0.149886	0.0589908	0.282223	0.226523	0.331357	0.232969	0.048835
agxtb	2	complement(22676743..22688651)	ENSDARG00000018478	#N/A	#N/A	#N/A	#N/A	#N/A	#N/A	#N/A	#N/A	#N/A	0	0	0	0	0	0	0	0	0	0	0	0
kif1ab	2	22694382..22758590	ENSDARG00000062024	-1.37552	-0.459974	0.796603	1.21563	0.281699	0.963367	1.67211	0.741673	0.63916	0.425786	0.0754991	0.60248	0.183394	0.0928384	0.0827631	0.371334	0.155836	0.356477	0.146373	0.366621	0.550094
espnlb	2	22765492..22792460	ENSDARG00000093112	1.54823	0.630616	0.876768	-1.73528	-0.795171	0.963367	-2.68661	-1.42579	0.766258	0	0.0699614	0	0	0	0.030677	0.0724414	0	0.0347716	0	0	0
rab6bb	2	22795494..22803665	ENSDARG00000031343	-1.258	-0.331128	0.537426	-1.10097	-0.138779	0.939446	1.14262	0.192349	0.791665	17.117	14.0891	17.0525	14.0062	8.62235	10.3865	9.97573	9.44944	15.301	12.8149	10.0713	14.5297
aire	2	22808946..22846553	ENSDARG00000056784	1.36538	0.449302	0.908224	-1.8868	-0.915941	0.93592	-2.5762	-1.36524	0.735438	0.103104	0.0914109	0	0	0	0	0.189303	0.0377357	0	0	0.0467251	0.0391781
amotl2b	2	22851832..22861178	ENSDARG00000061948	-1.31307	-0.392948	0.487948	1.15163	0.203671	0.93592	1.51217	0.596619	0.174384	5.93402	5.93188	8.26504	6.34685	3.4387	4.42796	3.83885	3.99382	7.897	5.27099	6.02811	9.56414
myo7bb	2	complement(22880605..22927958)	ENSDARG00000077201	1.72455	0.786222	0.842511	2.16439	1.11396	0.935323	1.25504	0.327738	0.951883	0	0	0.0191237	0.027942	0	0.0126098	0	0.0474863	0.0142929	0.0139384	0	0.0739521
sap130b	2	complement(22931159..22966127)	ENSDARG00000079352	1.68732	0.754733	0.191305	-1.13007	-0.176412	0.957339	-1.90679	-0.931145	0.064138	1.31389	1.26332	1.44017	1.00431	1.69468	2.05751	1.81775	1.12431	1.53301	1.09739	0.788318	0.745373
mllt1b	2	complement(22970140..23004355)	ENSDARG00000031709	1.20961	0.274538	0.709265	-1.27164	-0.346696	0.865065	-1.53819	-0.621234	0.220685	1.63645	1.3909	1.49905	1.3398	1.21493	1.49318	1.37813	1.41566	1.03694	0.941482	0.919352	1.37727
znf414	2	complement(22993958..23004305)	ENSDARG00000079229	-1.38656	-0.471513	0.515026	-1.07625	-0.106016	0.981318	1.28833	0.365498	0.680483	7.25718	6.74049	5.29738	6.19207	2.59205	4.46028	4.82216	2.73198	7.73569	4.93021	4.19716	5.56776
mknk2a	2	23006792..23024952	ENSDARG00000011373	-1.44253	-0.5286	0.452661	-1.88786	-0.916751	0.128758	-1.30871	-0.388151	0.666437	3.16694	3.71349	4.57753	3.96018	2.16808	1.74746	1.96946	2.41788	1.7106	2.10717	1.75928	2.04447
csnk1g2a	2	23039041..23078748	ENSDARG00000005458	1.10262	0.140936	0.842511	-1.00114	-0.00164671	0.998384	-1.10388	-0.142583	0.860088	17.6674	17.6613	14.296	13.5249	13.974	16.7675	12.3119	11.7805	16.2319	14.7535	12.7716	15.3293
mfsd12a	2	23081247..23103149	ENSDARG00000061908	1.02804	0.0398949	0.969314	1.0383	0.0542195	0.995172	1.00998	0.0143247	0.988421	1.26663	1.61122	0.844179	0.917175	0.992632	1.08472	0.926855	0.792788	1.22951	1.10435	0.965007	1.26951
si:dkey-218h11.6	2	23130389..23132134	ENSDARG00000093680	#N/A	#N/A	#N/A	#N/A	#N/A	#N/A	#N/A	#N/A	#N/A	0	0	0	0	0	0	0	0	0	0	0	0
prrx1a	2	complement(23165250..23172708)	ENSDARG00000033971	1.03543	0.0502343	0.969314	-1.05904	-0.082755	0.982781	-1.09656	-0.132989	0.87383	21.9316	24.2501	12.4896	19.6978	17.4433	19.2804	16.6445	11.5386	19.328	16.921	17.0545	16.3833
kifap3b	2	23222939..23293501	ENSDARG00000006862	1.17431	0.231808	0.819199	1.39696	0.482288	0.81969	1.1896	0.25048	0.821071	2.00842	2.03501	3.49597	1.59282	1.77947	1.6855	2.8388	2.0302	2.10714	3.2604	3.03393	3.27073
niban1b	2	complement(23295415..23349116)	ENSDARG00000023053	1.06459	0.0902961	0.942922	1.0572	0.0802497	0.990746	-1.00699	-0.0100464	0.99195	4.34666	1.50388	3.54193	3.37907	3.05128	2.36295	3.34147	1.759	3.95523	1.64004	3.5553	3.35705
rnf2	2	23351454..23361933	ENSDARG00000010381	-1.07775	-0.108026	0.869939	1.04955	0.0697682	0.982781	1.13115	0.177794	0.80579	27.9483	22.9692	23.3962	26.1268	18.7389	18.9532	18.0587	17.1381	28.6273	23.7272	22.6081	23.8248
ivns1abpb	2	complement(23379401..23391266)	ENSDARG00000013946	-1.76738	-0.821613	0.0341997	-1.39542	-0.480698	0.575253	1.26656	0.340915	0.602282	20.5119	19.008	26.0502	13.5556	7.5514	11.6472	10.1878	6.11142	18.2585	10.955	10.4945	13.8389
si:ch73-129a22.11	2	complement(23406784..23411368)	ENSDARG00000109615	-6.14936	-2.62044	0.642436	-7.13088	-2.83408	0.854796	-1.15961	-0.213643	0.982173	0.302492	0	0.178342	0	0	0	0	0	0	0	0	0
si:ch211-14p21.4	2	complement(23438411..23443189)	ENSDARG00000113501	-2.59456	-1.37549	0.842511	-3.00868	-1.58913	0.93592	-1.15961	-0.213643	0.982173	0	0	0.177664	0	0	0	0	0	0	0	0	0
si:ch211-14p21.3	2	complement(23475723..23479714)	ENSDARG00000111218	3.37296	1.75401	0.652142	-3.00141	-1.58564	0.936299	-10.1236	-3.33965	0.54544	0.15241	0	0	0	0.132926	0	0.419742	0	0	0	0	0
BX470197.1	2	23482798..23484348	ENSDARG00000111600	1.22427	0.291922	0.969314	9.90865	3.30869	0.834337	8.09352	3.01677	0.621743	0	0	0	0	0	0	0	0	0	0.96613	0	0
si:dkey-58b18.5_1	2	complement(23511594..23515584)	ENSDARG00000112109	5.97136	2.57806	0.687773	5.22391	2.38513	0.905005	-1.14308	-0.192931	0.982173	0	0	0	0	0	0	0	0.223125	0	0.26197	0	0
si:dkey-58b18.10_1	2	complement(23537868..23538794)	ENSDARG00000113007	#N/A	#N/A	#N/A	#N/A	#N/A	#N/A	#N/A	#N/A	#N/A	0	0	0	0	0	0	0	0	0	0	0	0
si:dkey-58b18.3	2	complement(23540185..23541059)	ENSDARG00000110969	1.22408	0.291702	0.969314	3.08408	1.62484	0.93592	2.5195	1.33314	0.86417	0	0	0	0	0	0	0	0	0.163954	0	0	0
si:dkey-58b18.2	2	complement(23542636..23546627)	ENSDARG00000111054	#N/A	#N/A	#N/A	#N/A	#N/A	#N/A	#N/A	#N/A	#N/A	0	0	0	0	0	0	0	0	0	0	0	0
si:dkey-58b18.10_2	2	complement(23568907..23569833)	ENSDARG00000116868	#N/A	#N/A	#N/A	#N/A	#N/A	#N/A	#N/A	#N/A	#N/A	0	0	0	0	0	0	0	0	0	0	0	0
si:dkey-58b18.6	2	complement(23571230..23572104)	ENSDARG00000112742	-2.59436	-1.37538	0.842511	-3.00845	-1.58902	0.93592	-1.15961	-0.213643	0.982173	0.18604	0	0	0	0	0	0	0	0	0	0	0
si:dkey-58b18.5_2	2	complement(23573682..23577672)	ENSDARG00000112714	5.93206	2.56853	0.678796	1.0556	0.0780585	0.995172	-5.61962	-2.49047	0.695106	0	0	0	0	0.132926	0	0	0.111562	0	0	0	0
si:dkey-58b18.10_3	2	complement(23599896..23600821)	ENSDARG00000109911	-2.59456	-1.37549	0.842511	-3.00868	-1.58913	0.93592	-1.15961	-0.213643	0.982173	0	0	0.217329	0	0	0	0	0	0	0	0	0
si:dkey-58b18.9	2	complement(23602463..23603061)	ENSDARG00000106841	-2.59456	-1.37549	0.842511	-3.00868	-1.58913	0.93592	-1.15961	-0.213643	0.982173	0	0	0.307406	0	0	0	0	0	0	0	0	0
si:dkey-58b18.8	2	complement(23604654..23609082)	ENSDARG00000113029	3.57785	1.83909	0.797268	1.0556	0.0780585	0.995172	-3.38941	-1.76103	0.821071	0	0	0	0	0	0.117595	0	0	0	0	0	0
rpp40	2	23613040..23620223	ENSDARG00000017605	1.23276	0.301891	0.808297	1.12732	0.172901	0.974469	-1.09353	-0.12899	0.94464	2.19822	2.41664	1.45154	2.49959	2.22395	2.46115	2.90591	1.02981	3.09961	1.20909	2.86903	2.13834
cdyl	2	complement(23622788..23677422)	ENSDARG00000038985	-1.43822	-0.524289	0.559667	-1.09479	-0.130648	0.979826	1.31371	0.393642	0.715523	2.75489	0.796449	2.29509	1.57351	0.757375	0.884719	1.34698	0.9206	1.37226	1.18381	1.65557	1.91158
oxsr1a	2	23677179..23726605	ENSDARG00000034189	1.18815	0.248722	0.631792	-1.26029	-0.333761	0.734118	-1.49742	-0.582483	0.0750838	4.53347	3.81394	4.48722	3.80553	4.01163	4.29667	3.97952	3.1489	3.16415	2.85815	2.86428	3.38243
slc22a13a	2	23731194..23745290	ENSDARG00000056551	-2.59436	-1.37538	0.842511	-3.00845	-1.58902	0.93592	-1.15961	-0.213643	0.982173	0.0667487	0	0	0	0	0	0	0	0	0	0	0
xirp1	2	complement(23749614..23768832)	ENSDARG00000030722	-1.75645	-0.812662	0.0334995	-2.7421	-1.45528	7.38916e-07	-1.56116	-0.64262	0.129147	17.3924	14.0343	14.0836	11.8699	5.78998	6.13152	8.80593	4.9434	4.15731	5.68081	4.78245	4.50035
si:dkey-24c2.7	2	complement(23773078..23778180)	ENSDARG00000092427	#N/A	#N/A	#N/A	#N/A	#N/A	#N/A	#N/A	#N/A	#N/A	0	0	0	0	0	0	0	0	0	0	0	0
csrnp1a	2	23790748..23805139	ENSDARG00000031426	-2.26599	-1.18014	0.0644577	-1.20683	-0.271224	0.93592	1.87764	0.90892	0.20683	4.05357	1.67936	6.47726	1.63173	0.958183	1.41384	1.04334	1.19242	2.13674	1.88839	2.64391	3.77156
gorasp1a	2	23808640..23820280	ENSDARG00000003068	1.02371	0.0338103	0.969314	-1.29253	-0.370193	0.702606	-1.32317	-0.404003	0.396632	11.302	9.34259	11.6336	10.0951	7.93824	9.92185	9.46117	6.76416	9.83783	6.52858	5.60466	8.83559
si:dkey-24c2.9	2	23823622..23837423	ENSDARG00000038979	-1.03931	-0.0556265	0.971195	-1.2058	-0.269992	0.972193	-1.16019	-0.214365	0.936075	0.776265	0.589907	0.261524	1.05082	0.870464	0.43111	0.407213	0.40587	0.684112	0.285919	0.904601	0.337107
tgfbr1a	2	complement(23856045..23931536)	ENSDARG00000017494	1.04924	0.0693485	0.969314	-1.84614	-0.884515	0.567269	-1.93705	-0.953863	0.282395	2.79224	1.29967	0.823118	1.92427	1.52205	1.68252	1.15349	1.27743	1.16886	0.659924	0.885774	0.795756
col15a1b	2	complement(23936954..24022085)	ENSDARG00000061848	1.0722	0.100568	0.898326	-1.15907	-0.212966	0.93592	-1.24275	-0.313533	0.62885	6.49425	5.0325	5.05642	4.59082	6.11801	4.66389	3.82284	3.1752	5.50484	3.74929	4.11132	3.69216
slc12a7a	2	complement(24027744..24069434)	ENSDARG00000073756	-1.73972	-0.798852	0.0161522	-1.04961	-0.0698476	0.982781	1.6575	0.729005	0.0285486	5.39391	4.23959	4.49748	4.64652	2.13496	1.92539	2.52157	1.87518	4.18917	3.25353	3.89559	5.39711
kcnh2a	2	24080694..24168670	ENSDARG00000029881	1.04849	0.0683066	0.969314	-1.42164	-0.507553	0.93592	-1.49057	-0.575859	0.791266	0.161021	0.0815765	0.325488	0.118894	0.100311	0.017885	0.253405	0.16838	0.0608166	0.098847	0.145944	0.122371
map4l	2	24177006..24252506	ENSDARG00000068745	1.08059	0.111825	0.868957	1.05284	0.0742873	0.982781	-1.02636	-0.0375379	0.981615	3.15554	2.14672	3.18668	2.66447	1.7848	2.35629	2.89683	2.29839	2.72586	2.25549	3.00165	2.88486
myh7	2	complement(24252987..24270062)	ENSDARG00000079564	-1.30847	-0.387879	0.647898	-1.16214	-0.216785	0.93592	1.12591	0.171093	0.87473	3.34721	1.96431	1.27817	2.18565	2.20246	0.768705	1.07165	1.08119	1.31221	1.09539	2.1053	2.45325
myh7l	2	complement(24274293..24289726)	ENSDARG00000079782	-1.71517	-0.778352	0.659088	-1.24425	-0.315281	0.963367	1.37847	0.46307	0.843236	0.15115	0.150758	0.178229	0.113931	0.0164784	0.0440702	0.138758	0.0691502	0.0333016	0.211091	0.085623	0.100511
fitm1l	2	24304854..24308682	ENSDARG00000056464	2.0008	1.00058	0.0411424	1.2177	0.284158	0.929021	-1.6431	-0.716417	0.210223	26.5435	11.1926	32.9211	34.2984	46.6534	21.8333	55.1237	37.793	27.1723	30.2541	33.0065	25.9534
trnau1apb	2	complement(24310635..24317436)	ENSDARG00000056475	1.3926	0.477777	0.350017	-1.09911	-0.136341	0.958815	-1.53062	-0.614118	0.161871	26.8393	32.9097	34.9832	26.8054	42.1227	36.2638	35.3431	21.6663	36.7261	15.7729	24.1386	29.9402
mrpl34	2	24317465..24320183	ENSDARG00000092954	1.20041	0.263522	0.718012	1.04796	0.0675804	0.990175	-1.14547	-0.195942	0.822222	57.6001	48.9302	63.88	83.9368	70.1541	47.7439	62.7777	57.6719	61.6078	47.9766	87.0494	51.4879
ano8a	2	complement(24321751..24348948)	ENSDARG00000076265	-1.1539	-0.206522	0.854696	-1.61113	-0.688077	0.660927	-1.39625	-0.481556	0.66122	1.58365	0.811225	1.4524	1.03074	0.644559	0.848232	0.96921	0.772812	0.744347	0.69564	0.542249	0.775607
pimr68	2	24352497..24355324	ENSDARG00000038955	-2.59436	-1.37538	0.842511	-3.00845	-1.58902	0.93592	-1.15961	-0.213643	0.982173	0.0881895	0	0	0	0	0	0	0	0	0	0	0
plvapa	2	complement(24365452..24369087)	ENSDARG00000076972	-1.30816	-0.387538	0.493213	-1.61819	-0.694377	0.149684	-1.23699	-0.306838	0.654105	24.1234	20.6393	19.4316	15.9063	12.2081	11.5007	11.6652	12.0627	12.3358	9.08637	14.5764	9.9964
nr2f6a	2	24374305..24386382	ENSDARG00000003607	1.18668	0.246937	0.733827	1.21397	0.279736	0.901892	1.02299	0.0327988	0.982173	4.5929	4.20773	2.75299	3.39599	3.93898	3.71981	3.75957	2.68956	4.6548	4.14462	4.09345	4.24673
zgc:154006	2	complement(24386453..24403153)	ENSDARG00000061797	2.00964	1.00694	0.657458	2.81087	1.49102	0.664812	1.39869	0.48408	0.861078	0.0916573	0.121893	0	0.118436	0.19985	0.142529	0.0841426	0.134184	0.0807763	0.0787728	0.581524	0.20897
si:dkey-208k22.6	2	complement(24400725..24407933)	ENSDARG00000061800	1.06321	0.0884222	0.969314	1.22542	0.293279	0.979647	1.15257	0.204857	0.960981	0.0849139	0.150567	0.0250316	0.109722	0.0740585	0.0330107	0	0.186468	0.11225	0.0364887	0.230889	0.064532
kcnn1a	2	complement(24410494..24462277)	ENSDARG00000091306	1.03445	0.0488676	0.969314	-1.26731	-0.341766	0.93592	-1.31097	-0.390634	0.781835	0.470698	0.584239	0.577225	0.291943	0.394103	0.190305	0.570382	0.399674	0.315263	0.242718	0.358364	0.500803
insl3	2	complement(24487320..24488652)	ENSDARG00000035862	-2.71036	-1.43848	0.728391	-9.19199	-3.20038	0.815698	-3.39143	-1.76189	0.826142	0	0	0.150404	0.329637	0.111247	0	0	0	0	0	0	0
si:rp71-39b20.4	2	complement(24495804..24505185)	ENSDARG00000035861	1.41339	0.499162	0.884326	-2.44061	-1.28724	0.93592	-3.44954	-1.78641	0.644297	0.0331973	0	0.0391446	0.0285974	0.0289534	0.0516224	0.0304756	0	0	0	0.0300888	0
rps28	2	24507597..24509698	ENSDARG00000035860	1.28526	0.362064	0.593824	1.11434	0.156193	0.952227	-1.15338	-0.20587	0.821071	1293.87	1493.15	1048.66	1402.66	1306.28	1548.83	1233.34	1240.21	1425.09	1436.66	1172.13	1457.65
angptl4	2	24536762..24542518	ENSDARG00000035859	-3.64866	-1.86737	1.00818e-06	-1.2026	-0.266161	0.93592	3.03396	1.6012	6.28216e-05	59.4645	95.2397	39.2987	41.9541	14.3606	11.6453	12.1562	13.1054	55.5085	45.9054	38.2535	48.1688
cnn2	2	complement(24548249..24554432)	ENSDARG00000035858	-1.13502	-0.182723	0.818941	-1.21669	-0.282957	0.901892	-1.07195	-0.100234	0.924258	91.9467	88.077	69.2285	69.3336	54.4308	64.1582	59.588	43.7	82.2709	52.6064	52.9769	59.5832
crtc1a	2	complement(24578053..24603325)	ENSDARG00000076068	-2.03544	-1.02534	0.531015	-1.34879	-0.43167	0.93592	1.50908	0.593671	0.793161	1.00518	0.29706	0.948209	0.288634	0	0.468923	0.246072	0.196209	0.17717	0.230368	0.485899	0.763908
mast3a	2	24638367..24683365	ENSDARG00000061725	-1.61848	-0.694641	0.224374	-1.44618	-0.53225	0.669607	1.11914	0.162391	0.873112	5.63082	2.24248	4.2607	4.254	1.96964	2.08365	1.79677	1.8735	3.13133	1.91501	1.69209	3.77581
pik3r2	2	24700922..24755347	ENSDARG00000018060	1.01252	0.0179555	0.978757	-1.07657	-0.106445	0.977077	-1.09005	-0.1244	0.897999	15.3674	9.52833	17.1513	12.2082	9.86206	12.171	10.3463	10.0729	12.0176	10.6492	11.2872	12.5211
ifi30	2	24762567..24767470	ENSDARG00000056378	-1.20352	-0.267257	0.748393	1.35866	0.442181	0.806012	1.63517	0.709437	0.188445	135.096	122.71	89.6809	124.246	86.3518	97.2245	65.5217	60.6037	235.298	114.534	98.2256	167.672
mpv17l2	2	24770435..24778912	ENSDARG00000056367	1.37754	0.462096	0.589386	-1.58137	-0.661176	0.620902	-2.1784	-1.12327	0.038745	3.27052	2.96702	3.04927	2.62079	3.05142	4.67176	3.14202	2.00427	2.01088	1.69954	1.58554	1.73407
pde4ca	2	24781026..24866649	ENSDARG00000013221	1.91456	0.937016	0.0222472	-1.4527	-0.538737	0.563093	-2.78129	-1.47575	1.0349e-05	3.23392	1.77729	4.19237	1.84092	4.96473	3.69073	3.90629	3.59924	1.68334	1.41404	2.10834	1.72469
rab3aa	2	24867534..24878813	ENSDARG00000056347	1.31142	0.391132	0.808297	-1.61799	-0.694206	0.869916	-2.12187	-1.08534	0.346612	3.91308	0.693856	0.692118	0.471923	0.853209	1.00401	3.37673	0.458294	1.00008	0.874383	0.461068	0.743456
si:dkey-149i17.7	2	24885987..24886752	ENSDARG00000094684	#N/A	#N/A	#N/A	#N/A	#N/A	#N/A	#N/A	#N/A	#N/A	0	0	0	0	0	0	0	0	0	0	0	0
si:dkey-149i17.9	2	complement(24896992..24898226)	ENSDARG00000112172	#N/A	#N/A	#N/A	#N/A	#N/A	#N/A	#N/A	#N/A	#N/A	0	0	0	0	0	0	0	0	0	0	0	0
si:dkey-149i17.8	2	complement(24900571..24901912)	ENSDARG00000092491	#N/A	#N/A	#N/A	#N/A	#N/A	#N/A	#N/A	#N/A	#N/A	0	0	0	0	0	0	0	0	0	0	0	0
si:dkey-149i17.11	2	complement(24902808..24907741)	ENSDARG00000097081	#N/A	#N/A	#N/A	#N/A	#N/A	#N/A	#N/A	#N/A	#N/A	0	0	0	0	0	0	0	0	0	0	0	0
agtr1a	2	24931677..24932753	ENSDARG00000018616	-1.30386	-0.382793	0.888152	-1.17405	-0.231492	0.98775	1.11057	0.151301	0.980125	0.772661	0.0978615	0.650775	0.380343	0	0.429108	0.202661	0.403986	0.389106	0	0.900401	0.167771
gyg1a	2	24936766..24944819	ENSDARG00000011934	1.2187	0.285338	0.710095	1.15499	0.207881	0.93592	-1.05516	-0.0774571	0.955673	55.6341	52.4574	80.0248	44.6471	68.0808	63.7921	46.9139	44.1062	58.4522	52.5248	73.4608	65.3141
hltf	2	complement(24944040..24962820)	ENSDARG00000026053	-1.34723	-0.429991	0.612423	1.12277	0.167059	0.962177	1.51262	0.59705	0.422963	2.14473	1.95582	4.26311	2.58658	1.6835	1.33404	1.18134	1.99605	3.32122	2.42255	2.1383	3.67899
nck1a	2	complement(24963861..24981356)	ENSDARG00000074262	-1.06034	-0.0845254	0.915784	1.37265	0.456969	0.586628	1.45548	0.541494	0.226793	10.4088	8.62117	10.0126	9.49745	6.74888	7.50727	8.61245	5.71436	10.7422	12.3591	12.2892	13.687
slc35g2a	2	complement(24990398..24996441)	ENSDARG00000056262	-1.80573	-0.852584	0.604028	-1.21912	-0.285841	0.967211	1.48118	0.566744	0.792991	0.246536	0.26229	0.232562	0.382275	0.172015	0.11501	0.0905292	0.108277	0.304176	0.211879	0.134071	0.224832
stag1a	2	25019387..25108587	ENSDARG00000061205	-1.04017	-0.0568173	0.951001	1.05333	0.0749513	0.982781	1.09564	0.131769	0.86417	3.90226	2.5673	4.71091	3.21482	2.78214	2.87752	2.54459	2.48236	3.04325	3.56664	3.90178	3.33041
pccb	2	complement(25108569..25120197)	ENSDARG00000038910	1.08599	0.119017	0.890854	-1.07507	-0.104427	0.97732	-1.16752	-0.223444	0.803967	51.3295	44.5145	55.3032	45.3203	33.5058	46.2149	50.354	37.4164	38.0885	44.1598	44.6854	41.5635
msl2a	2	25124498..25129409	ENSDARG00000038909	1.00918	0.0131873	0.983203	1.10062	0.138322	0.955405	1.09061	0.125134	0.881103	4.06073	3.39148	3.36563	3.90364	3.07966	3.34029	3.16053	2.17547	4.84935	3.41404	2.93373	4.04763
nceh1a	2	complement(25131349..25143373)	ENSDARG00000020427	1.405	0.490573	0.534886	1.52081	0.604841	0.632532	1.08243	0.114268	0.935325	9.68721	11.8478	13.0043	5.39211	21.7502	9.11553	7.02318	6.4364	11.9083	16.3094	16.2095	11.3261
si:dkey-223d7.6	2	complement(25158342..25159309)	ENSDARG00000094083	#N/A	#N/A	#N/A	#N/A	#N/A	#N/A	#N/A	#N/A	#N/A	0	0	0	0	0	0	0	0	0	0	0	0
ppp2r3a	2	25198648..25291181	ENSDARG00000077722	1.01725	0.0246785	0.973265	-1.20969	-0.274635	0.933454	-1.23056	-0.299313	0.750735	10.0948	5.1284	11.0232	7.50655	7.56743	3.78656	10.3806	4.83513	4.94974	3.89686	8.05024	8.80617
fndc3ba	2	25315591..25544850	ENSDARG00000078179	-1.0056	-0.00805626	0.989033	1.0405	0.0572804	0.991293	1.04633	0.0653367	0.956146	2.98157	2.13991	2.41078	2.18929	1.49833	1.99807	2.43734	1.62127	2.43993	2.46483	2.5351	1.87746
ghsra	2	complement(25551457..25553632)	ENSDARG00000056230	1.1266	0.171979	0.969314	-3.00868	-1.58913	0.93592	-3.38959	-1.76111	0.821071	0	0	0.126513	0	0.0935758	0	0	0	0	0	0	0
pld1a	2	25560556..25632090	ENSDARG00000056228	-1.19773	-0.260305	0.66589	-1.13773	-0.186152	0.93592	1.05274	0.0741528	0.938657	11.7787	7.27689	11.2808	10.1466	6.2753	6.71313	6.75201	6.35913	8.14931	7.12269	8.28459	9.33624
tnika	2	25657958..25817227	ENSDARG00000056218	-1.87375	-0.90593	0.0530393	-1.50542	-0.590166	0.521977	1.24467	0.315764	0.706815	15.803	12.1878	9.33711	17.8583	4.12001	10.8601	4.38342	4.17928	11.6208	5.89994	7.25405	10.1761
slc2a2	2	25816843..25837986	ENSDARG00000056196	-1.40332	-0.488843	0.904392	-2.25934	-1.1759	0.93592	-1.61	-0.687057	0.886204	0.170314	0.0377496	0	0	0.0371354	0	0.0390877	0.0311671	0	0.0731865	0	0
eif5a2	2	25839193..25845337	ENSDARG00000056186	-1.14352	-0.193483	0.832494	-1.06815	-0.0951092	0.982781	1.07057	0.0983739	0.936203	126.366	112.338	69.8644	89.4099	83.5289	85.8404	66.3939	41.0056	124.863	74.4052	67.9626	85.4348
slc7a14a	2	25860344..25990784	ENSDARG00000010816	1.11221	0.153431	0.9216	1.16414	0.219259	0.964796	1.04669	0.0658276	0.982173	0.368746	0.308762	0.458963	0.317651	0.250137	0.254847	0.451351	0.299909	0.288862	0.281698	0.352785	0.622745
cldn11a	2	complement(25997426..26001173)	ENSDARG00000020031	1.09019	0.124579	0.91307	1.01566	0.0224208	0.995172	-1.07338	-0.102159	0.949175	4.33603	4.56506	5.43239	4.82466	5.27864	3.72248	2.90247	4.29803	4.85621	4.26995	5.56753	3.5012
grin3ba	2	26060528..26156784	ENSDARG00000005364	1.08799	0.12166	0.969314	-1.7207	-0.782998	0.93592	-1.8721	-0.904659	0.738261	0.0581318	0.0257694	0.171365	0.0500769	0.1014	0.045198	0.0800487	0.0212759	0.0256154	0.04996	0.0526885	0.0220892
plppr3a	2	26179096..26209425	ENSDARG00000010144	1.41817	0.504031	0.842511	-2.28372	-1.19138	0.854796	-3.2387	-1.69541	0.368469	0.155601	0.110363	0.183478	0.0536164	0.108567	0.0725889	0.314257	0.0683392	0.0274259	0.160474	0	0
palm1b	2	26237322..26284245	ENSDARG00000007818	1.22461	0.292322	0.61635	1.31671	0.39694	0.689266	1.07521	0.104618	0.898065	15.5547	11.2311	13.9212	10.8012	12.5891	11.0554	15.8617	9.74583	14.6195	13.7755	17.1053	17.0604
ptbp1a	2	26288301..26300619	ENSDARG00000019362	-1.08942	-0.123559	0.879304	-1.21984	-0.286697	0.901892	-1.11972	-0.163138	0.86417	34.9083	29.3635	22.4719	25.5819	24.3673	21.2193	18.1747	16.862	30.275	17.3328	16.9658	22.5921
efna2a	2	26303627..26444503	ENSDARG00000031372	1.41975	0.505639	0.673792	1.68107	0.749381	0.709937	1.18406	0.243741	0.866181	0.761474	0.635399	0.792258	0.926064	0.898525	0.766186	1.06913	0.754118	1.34215	2.00179	0.649574	0.851025
rabggtb	2	complement(26463114..26469093)	ENSDARG00000068587	1.29779	0.376053	0.535708	1.05282	0.074257	0.986036	-1.23268	-0.301797	0.677822	8.84483	6.63528	7.22035	7.88568	7.49833	10.4837	6.47303	6.56488	9.26658	7.22939	5.99846	7.66192
acadm	2	complement(26470070..26476150)	ENSDARG00000038900	1.14413	0.194257	0.835049	1.16205	0.216677	0.93592	1.01566	0.0224195	0.982173	326.549	548.476	623.11	497.346	497.944	483.298	431.939	409.147	546.936	675.268	431.375	528.198
hectd3	2	26479676..26495044	ENSDARG00000038905	-1.14063	-0.189828	0.754709	-1.23978	-0.310081	0.818901	-1.08693	-0.120253	0.866186	25.9388	21.3341	17.4574	21.1759	13.8173	18.3991	15.02	12.064	19.3426	14.8845	13.4911	17.3168
rps8a	2	26498446..26501868	ENSDARG00000055996	1.14293	0.19274	0.816746	-1.02438	-0.0347453	0.995172	-1.17079	-0.227486	0.807229	1755.34	2003.27	1476.68	1761.34	1514.71	1967.57	1506.75	1364.88	1721.5	1627.36	1377.09	1705.56
BX569796.4	2	complement(26499502..26499842)	ENSDARG00000113087	#N/A	#N/A	#N/A	#N/A	#N/A	#N/A	#N/A	#N/A	#N/A	0	0	0	0	0	0	0	0	0	0	0	0
best4	2	complement(26504969..26509057)	ENSDARG00000078455	3.57785	1.83909	0.797268	3.08399	1.6248	0.93592	-1.16014	-0.214295	0.982173	0	0	0	0	0	0.0815798	0	0	0	0	0	0.0797395
si:ch211-106k21.5	2	complement(26518813..26527730)	ENSDARG00000086052	1.54812	0.630517	0.881658	2.85	1.51096	0.870801	1.84094	0.880445	0.821071	0	0	0.394309	0	0.145826	0.13	0	0.122389	0.147351	0	0.303089	0.508269
glis1a	2	complement(26529447..26563978)	ENSDARG00000068580	1.09908	0.1363	0.930504	1.11308	0.154562	0.980414	1.01274	0.0182615	0.988943	1.40769	1.31044	0.82994	0.97011	0.982186	0.985043	1.29228	0.721291	1.48869	1.20981	0.95691	1.12329
ndc1	2	complement(26576853..26590628)	ENSDARG00000021120	-1.00594	-0.00854635	0.98703	-1.06242	-0.0873585	0.976382	-1.05615	-0.0788122	0.932116	11.1612	6.48183	8.16168	8.08675	7.01777	7.97157	6.1159	5.09825	9.37869	6.84096	7.13615	6.24655
zgc:113691	2	complement(26591968..26596794)	ENSDARG00000038898	2.60898	1.38348	0.744629	2.24866	1.16907	0.93592	-1.16024	-0.214418	0.97945	0	0.105608	0	0	0	0.0926151	0.218703	0	0	0	0.215928	0.0905259
yipf1	2	complement(26598801..26604318)	ENSDARG00000014474	-1.27671	-0.352435	0.535425	1.00525	0.00755951	0.995172	1.28342	0.359995	0.543594	12.9504	7.73253	7.47943	10.4274	5.67047	7.23329	6.06564	4.68175	11.5062	6.35996	7.85713	10.7257
lrrc42	2	26604773..26611033	ENSDARG00000030591	1.58711	0.666398	0.527535	1.23291	0.30207	0.93592	-1.28728	-0.364328	0.801604	1.62425	1.37146	2.00644	1.86558	2.96812	3.06696	1.34907	1.24555	2.24938	1.72829	0.771131	3.2329
tmem59	2	complement(26612574..26620902)	ENSDARG00000019033	1.01753	0.025065	0.970639	1.17548	0.23325	0.93592	1.15523	0.208185	0.822222	96.5274	93.1129	70.7654	76.6901	68.1644	82.5501	57.8342	60.9635	114.684	88.1555	72.919	97.6748
u2surp	2	complement(26623377..26642944)	ENSDARG00000061490	1.15305	0.205457	0.759366	-1.14867	-0.199961	0.93592	-1.32447	-0.405417	0.456738	23.5754	21.1171	27.5482	19.1834	22.1778	22.3929	22.1445	16.145	22.8383	13.3161	18.7795	19.9945
ttpa	2	26647472..26653148	ENSDARG00000027584	1.01678	0.0240024	0.981832	-1.10472	-0.143686	0.981318	-1.12326	-0.167688	0.917966	2.00069	2.05987	3.57672	0.945127	2.36408	1.40501	1.59967	1.37	2.10444	0.887455	2.28131	1.96188
asph	2	26655744..26682182	ENSDARG00000055945	1.43177	0.5178	0.396551	-1.15994	-0.214044	0.93592	-1.66076	-0.731845	0.138341	34.3594	22.1845	20.4624	19.5993	28.6939	33.0557	24.3321	21.3688	24.6246	18.558	18.7315	14.7024
impa1	2	26682913..26688908	ENSDARG00000003517	1.10552	0.144731	0.862544	1.04907	0.069105	0.990435	-1.05382	-0.0756256	0.956251	15.4706	10.1868	6.08073	10.1316	7.65384	12.943	9.63427	6.2913	10.2056	10.419	8.938	11.0696
si:dkey-181m9.8	2	complement(26692358..26720854)	ENSDARG00000078267	-1.31693	-0.397176	0.718733	-1.00408	-0.00587502	0.997012	1.31158	0.391301	0.750407	3.11422	0.955739	1.48298	2.83748	1.25359	1.25723	1.09958	1.2713	2.95564	1.44116	1.51987	1.91158
cdh7a	2	27010439..27094653	ENSDARG00000023542	-1.09984	-0.137292	0.929262	-1.11727	-0.159973	0.97912	-1.01585	-0.0226812	0.986878	1.96121	1.07002	0.948744	0.909709	0.789457	1.32936	0.830962	0.515339	1.46248	1.12368	0.638102	0.840772
dsela	2	complement(27311863..27319914)	ENSDARG00000061461	1.00949	0.0136259	0.989187	1.19715	0.259601	0.938134	1.18589	0.245975	0.86417	1.5596	0.479718	1.20098	0.822548	0.888306	0.470192	1.02267	0.722243	0.8415	0.683857	1.44241	1.42713
tmx3a	2	complement(27318174..27330181)	ENSDARG00000038894	1.7263	0.787684	0.803144	-7.13053	-2.83401	0.861748	-12.3095	-3.62169	0.473471	0.044358	0	0	0.0764233	0	0.0344888	0.0814425	0.0649393	0	0	0	0
tesk2	2	27330461..27380161	ENSDARG00000061450	-1.36887	-0.452982	0.392559	1.30238	0.381148	0.778601	1.78278	0.83413	0.0232703	7.09318	5.75246	4.89517	5.02089	3.04524	2.94989	3.93727	3.03881	6.37226	4.6075	7.5005	9.29774
toe1	2	complement(27379861..27385934)	ENSDARG00000077544	1.01039	0.0149109	0.983742	-1.02367	-0.0337546	0.995172	-1.03431	-0.0486655	0.981615	7.34065	5.01067	5.36196	5.09238	5.55237	5.20234	3.63777	3.56634	5.61046	4.91301	4.59254	5.62804
si:ch73-382f3.1	2	27386617..27391558	ENSDARG00000093833	1.69799	0.763832	0.29065	1.04699	0.0662503	0.995172	-1.62178	-0.697582	0.365593	2.53957	2.92093	2.18521	2.0103	3.65162	3.62889	2.14233	3.36619	2.29858	2.5955	2.30178	2.29513
selenop2	2	27394798..27401105	ENSDARG00000079727	1.10078	0.138524	0.969314	1.21824	0.284802	0.991329	1.10671	0.146278	0.982173	0	0	0.106275	0.15528	0.0786065	0	0.165478	0	0	0.0774589	0.163378	0.0684949
elovl8a	2	27403300..27409706	ENSDARG00000068551	1.22408	0.291702	0.969314	3.08425	1.62492	0.93592	2.51964	1.33322	0.86417	0	0	0	0	0	0	0	0	0	0.0814739	0	0
CU469530.2	2	complement(27469669..27473645)	ENSDARG00000114805	3.56609	1.83434	0.594155	-1.0194	-0.0277234	0.996524	-3.63528	-1.86207	0.603237	0	0.0985938	0	0	0	0.21616	0	0.122103	0	0	0.100793	0
zswim5	2	27491066..27543942	ENSDARG00000055900	1.06903	0.0963069	0.879291	1.07284	0.101428	0.963367	1.00356	0.00512155	0.993566	4.96286	3.79076	4.74909	3.79834	3.34619	4.14064	4.24056	2.73854	5.31572	3.8715	3.33901	4.72903
urod	2	complement(27556168..27575803)	ENSDARG00000006818	-1.03471	-0.0492203	0.969314	-1.16316	-0.218052	0.94759	-1.12415	-0.168831	0.899209	6.62486	3.42621	2.38691	2.61567	2.08648	3.36239	3.80107	2.08791	3.48682	3.00495	2.41849	3.00683
lyn_1	2	complement(27577470..27609189)	ENSDARG00000067916	-1.30423	-0.383194	0.587441	1.21039	0.275467	0.905618	1.57862	0.658661	0.204493	7.42096	3.25772	4.63009	4.31352	2.32499	3.05299	4.23304	2.0568	6.57174	4.76785	3.33039	7.28234
lyn_2	2	complement(27611956..27651674)	ENSDARG00000107511	-1.04266	-0.0602731	0.969314	1.1203	0.163884	0.959827	1.16809	0.224157	0.822576	2.34544	1.77569	1.67802	1.4075	1.21817	1.53674	1.57252	1.08026	2.1599	1.54011	1.50479	2.28315
tmem68	2	27651984..27665539	ENSDARG00000086737	1.24638	0.31774	0.67354	1.00115	0.00165853	0.998778	-1.24494	-0.316082	0.69588	3.92946	1.78962	2.34845	2.2953	2.67597	2.30185	3.16256	1.89128	2.79884	1.80419	2.19545	2.78173
XKR4	2	complement(27670284..27775236)	ENSDARG00000104264	-1.05681	-0.0797211	0.969314	-3.66743	-1.87477	0.545259	-3.47027	-1.79505	0.37641	0.178039	0.0676488	0.0299908	0.0876399	0.110914	0.0988766	0.023349	0.0372352	0.0448296	0.0218589	0.0230526	0
FO834800.1	2	complement(27811038..27855576)	ENSDARG00000090770	-1.64864	-0.721273	0.125335	1.01108	0.0158905	0.995172	1.6669	0.737164	0.101983	3.74886	2.72302	2.37001	3.89085	1.47723	1.24668	1.51343	1.73574	4.13972	2.42611	2.29251	3.34674
FO834800.2	2	27830436..27842166	ENSDARG00000113057	-1.55556	-0.637438	0.677189	1.00484	0.0069708	0.997563	1.5631	0.644409	0.695106	2.26046	2.55066	2.05964	0.708088	1.25458	1.67764	1.03757	0	2.26376	1.9427	0.838144	2.10831
buc	2	27855102..27859558	ENSDARG00000096095	-1.48305	-0.568565	0.842511	1.29416	0.372012	0.96894	1.9193	0.940577	0.704617	0.113688	0.100794	0.0893701	0.0652899	0	0.117858	0.034789	0.0277394	0.23378	0.0977064	0.0343475	0.0863992
rnf152	2	27867830..27871054	ENSDARG00000087782	-1.35051	-0.433504	0.703798	1.19473	0.256679	0.938804	1.61349	0.690184	0.485398	4.94003	1.62475	1.78509	2.81414	1.04238	1.05316	2.26751	1.86635	2.80876	2.05432	2.38317	5.02588
zgc:163121	2	complement(27877908..27900535)	ENSDARG00000055370	-1.26896	-0.343642	0.947331	-7.13108	-2.83412	0.866307	-5.61964	-2.49048	0.704507	0	0	0.0635723	0.0928864	0.0940426	0	0	0	0	0	0	0
mc4r	2	27932781..27933864	ENSDARG00000015515	-2.59456	-1.37549	0.843027	1.60992	0.686989	0.970161	4.17703	2.06248	0.769789	0	0	0.129315	0	0	0	0	0	0	0	0.198797	0
C2H5orf22	2	complement(27957642..27975530)	ENSDARG00000011723	1.19755	0.26009	0.780646	1.13384	0.181223	0.952162	-1.05619	-0.0788669	0.962501	3.41215	3.08567	5.31095	3.87995	3.21402	3.92641	4.07213	3.29692	4.02949	3.81225	3.46377	5.03068
cdh6	2	complement(28049046..28102264)	ENSDARG00000014522	1.23771	0.307678	0.615556	1.20329	0.266986	0.897962	-1.02861	-0.0406919	0.981615	6.08636	3.19309	5.26733	4.95442	6.03878	4.45001	4.61342	3.59682	5.38843	5.56671	5.7442	4.73154
CABZ01056052.1	2	complement(28385115..28396993)	ENSDARG00000110748	1.80368	0.850941	0.537976	2.01785	1.01282	0.666558	1.11874	0.161876	0.948442	1.4061	1.69995	0.301456	0.770807	1.78378	1.78897	1.9949	0.654979	4.61875	1.20844	1.50616	1.06859
CABZ01056051.1	2	complement(28414830..28420415)	ENSDARG00000114465	1.92788	0.947017	0.434714	1.94442	0.959343	0.674649	1.00858	0.0123253	0.993718	2.03055	0.327319	0.870664	0.715579	1.12698	1.36348	2.28773	1.01342	1.7895	1.18985	0.585587	3.43703
mmp15b	2	28453338..28521429	ENSDARG00000013072	-1.38072	-0.465423	0.680867	1.01509	0.0216099	0.995172	1.40156	0.487033	0.694677	1.27544	0.584888	2.22997	1.4018	0.575372	0.786492	1.13049	0.57948	1.20154	1.13394	1.43505	1.30353
dhcr7	2	complement(28648888..28682476)	ENSDARG00000103226	-1.42986	-0.515871	0.566989	-4.00493	-2.00178	1.18504e-05	-2.80093	-1.48591	0.00384656	19.1259	20.3481	5.70856	5.32889	4.06596	11.2691	4.69124	7.61249	3.5291	3.56998	2.24814	2.33924
nadsyn1	2	28672152..28692928	ENSDARG00000101378	1.17553	0.233314	0.840977	-1.38343	-0.46825	0.867612	-1.62627	-0.701564	0.375844	3.03803	2.57637	3.5823	2.73086	1.78563	2.31075	4.18343	2.6589	2.15354	2.10013	2.03524	1.70651
cdh10a	2	28889936..28934284	ENSDARG00000055843	-1.75134	-0.808461	0.764769	1.82897	0.871029	0.893794	3.20315	1.67949	0.375335	0.0862696	0.152971	0.0508625	0.111474	0	0	0.158393	0.0315742	0.304113	0.0741424	0.195479	0.163906
cdh12a	2	28995776..29116892	ENSDARG00000078226	-6.14936	-2.62044	0.642436	-7.13088	-2.83408	0.854796	-1.15961	-0.213643	0.982173	0.0807605	0	0.0476144	0	0	0	0	0	0	0	0	0
cdh18a	2	29249204..29353179	ENSDARG00000061371	-1.01766	-0.025262	0.986279	-1.00685	-0.00984837	0.996676	1.01074	0.0154136	0.993478	0.335017	0.251326	0.212712	0.0221997	0.157332	0.200368	0.165604	0.0943189	0.18169	0.199331	0.210217	0.156679
cahz	2	complement(29477383..29485408)	ENSDARG00000011166	2.6199	1.38951	0.0129081	1.35411	0.437346	0.880788	-1.93478	-0.952167	0.149075	64.8316	36.3536	29.4669	30.7055	46.2936	159.305	97.5736	34.5049	27.6002	38.1258	71.871	58.8885
dlgap1a	2	29491314..29692825	ENSDARG00000014280	-3.32002	-1.73119	0.64468	-1.06069	-0.0850067	0.995172	3.13005	1.64619	0.695106	0.0684395	0	0.0403503	0.0589564	0	0.0266062	0	0	0.0301574	0	0.0930467	0.026006
ptf1a	2	29710857..29711761	ENSDARG00000014479	#N/A	#N/A	#N/A	#N/A	#N/A	#N/A	#N/A	#N/A	#N/A	0	0	0	0	0	0	0	0	0	0	0	0
si:dkey-188g12.1	2	complement(29717786..29762088)	ENSDARG00000076896	-2.59447	-1.37544	0.842511	2.88714	1.52964	0.900246	7.49059	2.90508	0.604957	0	0.0626616	0	0	0	0	0	0	0.062287	0	0.0640595	0.107425
si:ch211-207d6.2	2	29795833..29896572	ENSDARG00000031658	-1.92281	-0.943216	0.00606813	-1.55138	-0.633555	0.2096	1.23942	0.309661	0.634838	14.6219	9.77623	13.4044	11.384	3.8543	6.81679	6.39196	3.18285	8.84119	5.70315	6.56843	8.54204
paxip1	2	complement(29902294..29923630)	ENSDARG00000005606	1.05297	0.0744643	0.937695	-1.19562	-0.257764	0.901892	-1.25896	-0.332229	0.633437	3.56356	2.95484	3.08347	2.56184	2.14653	3.08963	2.89484	1.93291	3.66017	1.93893	1.88216	2.10421
htr5aa	2	29925561..29940519	ENSDARG00000038869	1.22408	0.291702	0.969314	3.08399	1.6248	0.93592	2.51943	1.3331	0.86417	0	0	0	0	0	0	0	0	0	0	0	0.0295438
en2b	2	29976419..29979956	ENSDARG00000038868	1.99859	0.998986	0.547537	1.21658	0.282832	0.976382	-1.6428	-0.716154	0.710713	0.195418	0.173255	0.307237	0.280568	0.340872	0.303879	0.418592	0.429133	0.0574065	0.111965	0.23616	0.643552
cnpy1	2	complement(29985664..29996036)	ENSDARG00000003757	-1.10456	-0.143465	0.869388	-1.06382	-0.0892521	0.983156	1.03829	0.0542133	0.977127	12.8929	11.841	6.4709	8.88517	8.07312	9.35608	6.00899	5.27532	15.0333	6.8188	7.19119	6.93414
rbm33b	2	29995590..30047637	ENSDARG00000094896	-1.15219	-0.204383	0.965192	-1.28812	-0.365269	0.977538	-1.11797	-0.160885	0.982009	0.194565	0.172499	0.0573555	0.0419015	0	0.189095	0.0446534	0.07121	0.171468	0.167215	0	0
shhb	2	complement(30050541..30055432)	ENSDARG00000038867	1.84678	0.885014	0.597076	-1.04669	-0.0658303	0.995172	-1.933	-0.950844	0.579237	0.412163	0.156607	0.0694289	0.55794	0.308119	0.54936	0.648636	0.301699	0.207562	0.607241	0.160101	0.0894946
dnajb6a	2	30103131..30116467	ENSDARG00000004680	1.00173	0.00249739	0.996594	1.11877	0.161909	0.93592	1.11683	0.159411	0.844912	14.9666	14.5067	16.5506	16.2997	11.7006	15.8572	14.9497	7.43603	16.0601	14.3955	17.7823	16.9728
trpa1a	2	complement(30116486..30135446)	ENSDARG00000016699	1.13481	0.182449	0.797268	1.18925	0.25005	0.901892	1.04797	0.0676009	0.95192	4.20069	3.10356	3.5003	3.90812	3.37058	3.98461	2.85365	2.82887	4.02285	3.80273	4.39114	4.15011
kcnb2	2	30144979..30177469	ENSDARG00000038862	1.04765	0.067155	0.969314	1.11423	0.156047	0.976844	1.06355	0.0888919	0.971964	0.550716	0.554837	0.501791	0.603791	0.45848	0.428186	0.666426	0.311501	0.617703	0.451786	0.567214	0.684863
rpl7	2	complement(30177476..30182353)	ENSDARG00000007320	1.07291	0.101527	0.906994	-1.03743	-0.0530113	0.995172	-1.11307	-0.154539	0.86417	2399.51	2306.52	1905.48	2195.46	1703.4	2241.59	1779.15	1711.47	2198	1966.92	1750.33	2033.72
rdh10b	2	30182431..30186307	ENSDARG00000012369	1.35121	0.434253	0.537413	1.10564	0.144886	0.963367	-1.2221	-0.289367	0.748386	4.39554	8.67974	6.98921	7.34349	8.48043	6.57624	6.9087	7.50749	7.74746	8.87176	5.97594	6.12421
ube2w	2	complement(30193747..30200206)	ENSDARG00000044923	-1.05204	-0.073192	0.937518	1.13915	0.187963	0.93592	1.19844	0.261155	0.724438	8.77514	8.72612	7.55068	6.89525	6.87766	5.90076	5.38861	5.5987	10.5551	7.28682	7.63103	8.78665
elocb	2	complement(30244376..30250311)	ENSDARG00000045359	1.14009	0.189151	0.822326	1.08311	0.115178	0.973733	-1.05261	-0.0739732	0.957919	30.5329	30.1774	31.4866	34.2395	26.9132	22.5877	33.8677	29.2002	34.7737	32.3274	32.8157	27.8174
tmem70	2	30249977..30252347	ENSDARG00000078773	1.40702	0.492644	0.345695	-1.40534	-0.490921	0.589815	-1.97734	-0.983564	0.00567117	22.8871	20.7839	19.651	24.3098	31.2984	20.5592	24.0705	20.8194	12.8266	15.0865	17.4209	12.4119
si:dkey-82k12.13	2	30281444..30286249	ENSDARG00000105462	-1.008	-0.0114932	0.994834	-1.18012	-0.238928	0.982781	-1.17075	-0.227435	0.944088	1.13219	0.301134	0.133502	0.487654	0.691213	0.264085	0.415745	0.248625	0.49889	0.583819	0	0.516256
jph1b	2	complement(30290719..30324610)	ENSDARG00000038826	1.05783	0.0811039	0.949572	1.18994	0.250891	0.93592	1.12489	0.169787	0.87283	67.8498	64.6677	129.44	77.214	53.5506	45.3791	94.8238	83.2463	84.0921	80.539	98.2055	114.493
pi15b	2	30368800..30376396	ENSDARG00000061292	-1.06569	-0.0917929	0.969314	-1.10086	-0.138626	0.995172	-1.03299	-0.0468331	0.985727	0.11215	0.124289	0.132242	0.0241527	0.0978132	0.0217995	0.0772167	0.082093	0	0.0963852	0.0254123	0.19177
crispld1b	2	30379650..30395993	ENSDARG00000013293	-1.64158	-0.715081	0.704024	2.21128	1.14488	0.570276	3.62997	1.85996	0.0795685	0.300352	0.0532576	0.424993	0.413976	0.104782	0.0934107	0.165437	0.175884	0.582332	0.722767	0.490011	0.639124
socs6b	2	30423428..30430345	ENSDARG00000015863	1.09774	0.134537	0.861121	1.1356	0.183458	0.93592	1.03449	0.0489202	0.976879	6.72976	3.72476	3.62368	5.12707	3.86772	4.62754	3.89251	3.98645	5.45089	4.71392	4.30146	5.85349
cbln2a	2	complement(30458706..30460293)	ENSDARG00000074601	-6.1494	-2.62045	0.648293	-1.47243	-0.558204	0.970647	4.17635	2.06224	0.771134	0.180943	0.320843	0	0	0	0	0	0	0	0	0	0.275022
neto1	2	30463825..30480455	ENSDARG00000068483	8.28527	3.05055	0.594155	5.11264	2.35407	0.901892	-1.62055	-0.69648	0.86417	0	0	0	0	0	0.0330934	0	0.015578	0	0.0182901	0	0.0161734
atpsckmt	2	30480907..30483209	ENSDARG00000033451	1.5887	0.667847	0.326983	1.09435	0.130073	0.97732	-1.45173	-0.537774	0.502433	5.90423	5.43594	10.443	9.78102	9.3086	8.38667	13.1335	8.64368	11.007	8.29446	8.02707	5.00477
march6	2	30489846..30526721	ENSDARG00000076066	1.17036	0.226953	0.706702	1.11417	0.155968	0.93592	-1.05043	-0.070985	0.940341	14.8725	11.8316	17.1236	14.2999	13.7136	12.8678	14.4576	11.9678	16.6153	13.7716	13.5252	16.4211
ankrd33bb	2	30531726..30548220	ENSDARG00000015589	8.28569	3.05062	0.607234	11.1999	3.48541	0.799465	1.35172	0.434792	0.923466	0	0	0	0	0	0.0634385	0	0.119449	0.0719058	0.210367	0.073952	0
ctnnd2b	2	complement(30554256..30693742)	ENSDARG00000003779	-1.06878	-0.0959637	0.964861	-1.13285	-0.179956	0.976103	-1.05995	-0.0839921	0.977865	0.497324	0.288294	0.29321	0.280116	0.266921	0.282569	0.368752	0.0980097	0.303428	0.263024	0.294725	0.261658
si:dkey-94e7.1	2	complement(30713868..30721502)	ENSDARG00000077026	3.59261	1.84503	0.804859	15.1033	3.9168	0.710503	4.204	2.07176	0.586139	0	0	0	0	0.0864737	0	0	0	0	0	0.269595	0.301401
si:dkey-94e7.2	2	30721070..30726420	ENSDARG00000068474	1.98789	0.991237	0.797268	-1.04677	-0.0659469	0.995172	-2.08087	-1.05718	0.809941	0	0.0747495	0	0	0.0367667	0.0983297	0	0	0	0	0.0382085	0.0320372
rp1	2	complement(30732886..30734098)	ENSDARG00000077687	#N/A	#N/A	#N/A	#N/A	#N/A	#N/A	#N/A	#N/A	#N/A	0	0	0	0	0	0	0	0	0	0	0	0
tcea1	2	30739680..30748070	ENSDARG00000003531	1.313	0.392869	0.438223	-1.2706	-0.345515	0.805045	-1.66831	-0.738384	0.0354682	9.73961	6.60873	7.5043	7.11793	8.06517	10.5251	7.13351	6.07406	8.08759	4.71406	4.1748	5.87869
rgs20	2	complement(30752501..30784502)	ENSDARG00000038859	-1.14343	-0.193366	0.899685	1.37592	0.460402	0.901892	1.57327	0.653768	0.57865	0.405586	0.321736	0.302051	0.349387	0.111706	0.199167	0.411527	0.234383	0.413875	0.366918	0.541739	0.470461
atp6v1h	2	30786773..30846927	ENSDARG00000006370	-1.06032	-0.0844942	0.907281	1.14273	0.19248	0.93592	1.21165	0.276974	0.648852	27.9716	24.2457	20.0989	25.4942	16.282	20.0006	18.5136	17.5043	31.0889	24.0933	22.4664	27.5685
oprk1	2	30878864..30886567	ENSDARG00000006894	1.86791	0.901426	0.843027	-1.02967	-0.0421867	0.995172	-1.92334	-0.943613	0.86417	0	0	0	0.0689147	0	0	0	0.117118	0	0	0.0725088	0
chmp5a	2	30894595..30901120	ENSDARG00000038855	1.38052	0.465217	0.851351	3.81437	1.93144	0.237139	2.76298	1.46623	0.291535	0.107389	0.0952094	0.253256	0.277527	0.0936603	0.333983	0.197169	0.157215	1.04104	0.461465	0.681334	0.571286
bag1	2	30904069..30908300	ENSDARG00000020895	1.10086	0.138634	0.842511	1.05294	0.0744257	0.981318	-1.04551	-0.0642084	0.949175	17.1267	14.3723	15.1192	17.9094	14.3781	13.9571	17.6563	10.3913	18.2414	11.7281	15.606	18.4448
myl12.2	2	complement(30910134..30912922)	ENSDARG00000025326	1.26477	0.338879	0.566806	1.29194	0.369535	0.78979	1.02148	0.0306559	0.982173	45.1538	65.1379	49.6335	45.7097	48.2811	53.8513	53.5126	50.6052	55.1937	70.0489	57.8047	66.2076
myom1a	2	30916188..30959913	ENSDARG00000061249	1.37542	0.459871	0.532335	1.11177	0.152857	0.963367	-1.23714	-0.307014	0.746072	217.57	122.26	184.986	142.398	147.615	129.527	250.118	175.645	110.236	175.071	205.981	175.529
lpin2	2	30960351..30984508	ENSDARG00000061214	1.16822	0.224309	0.730154	1.19655	0.258876	0.892983	1.02425	0.0345663	0.982173	8.76564	6.97935	8.74148	9.31921	7.81353	8.48635	9.5544	5.42651	10.5129	7.53343	11.2497	8.46008
emilin2a	2	complement(30986996..31018096)	ENSDARG00000061196	-1.23808	-0.308108	0.734826	-1.26217	-0.335911	0.901892	-1.01946	-0.027803	0.982173	15.9034	7.71974	24.0558	9.2055	8.25313	7.80507	12.7828	6.71602	9.35418	6.37006	16.5666	8.61338
clul1_1	2	31271082..31364659	ENSDARG00000005941	1.01176	0.016864	0.974369	-1.31622	-0.396395	0.661639	-1.33169	-0.413259	0.39446	11.7531	12.2719	11.4855	9.1105	8.49526	10.8507	9.29051	7.10214	10.0399	7.89801	6.02329	7.96523
adcyap1b	2	complement(31296644..31302619)	ENSDARG00000027740	1.1691	0.225395	0.824442	1.36205	0.44578	0.84421	1.16504	0.220385	0.845806	2.00681	1.638	1.42731	1.04273	1.08349	1.56031	1.46212	1.42233	2.47039	1.88896	1.47244	1.93665
clul1_2	2	complement(31363286..31376607)	ENSDARG00000055595	-2.00231	-1.00166	0.79679	1.45503	0.54105	0.961394	2.91342	1.54271	0.646051	0.114033	0	0	0.147349	0	0	0.052342	0.0417355	0.200991	0	0.103355	0.0866617
colec12	2	31382590..31435158	ENSDARG00000061140	1.06344	0.0887424	0.902547	1.11619	0.158587	0.93592	1.0496	0.0698443	0.94165	9.41231	6.71497	9.53781	7.55914	6.96914	6.68926	6.863	6.76413	7.6901	8.13133	9.64178	8.62467
stam	2	31437547..31452606	ENSDARG00000002127	1.20318	0.266849	0.625063	1.1516	0.203641	0.914086	-1.04479	-0.0632075	0.947923	9.30925	7.59202	8.79692	8.63407	7.60994	8.92774	9.37978	6.52936	9.57623	8.16789	9.08435	10.0821
si:dkey-32m20.1	2	31454562..31457860	ENSDARG00000075715	1.22408	0.291702	0.969314	5.11306	2.35419	0.901892	4.17705	2.06248	0.766258	0	0	0	0	0	0	0	0	0	0.0942512	0.0993986	0
cacnb2b	2	31475772..31519662	ENSDARG00000055565	-2.59456	-1.37549	0.843027	2.88719	1.52967	0.901892	7.49099	2.90516	0.613648	0	0	0.0735451	0	0	0	0	0	0	0	0.113062	0.0948004
mrc1b	2	complement(31515853..31540922)	ENSDARG00000038822	-1.18823	-0.248812	0.802632	-1.01445	-0.0207009	0.995172	1.1713	0.228112	0.846465	3.13043	3.59269	3.75919	3.50733	2.39524	1.2991	2.59169	2.81159	2.64033	1.05634	4.07319	5.48783
si:ch211-106h4.4	2	31597841..31607080	ENSDARG00000093629	2.7153	1.44111	0.0684384	2.17986	1.12423	0.37036	-1.24563	-0.316876	0.841721	0.465121	0.388112	0.096785	0.801346	0.859045	1.51036	1.20561	0.380519	1.44672	0.94056	0.793541	0.499028
si:ch211-106h4.9	2	complement(31599963..31664615)	ENSDARG00000075706	-1.14868	-0.199975	0.851289	-1.03089	-0.043896	0.995172	1.11425	0.156079	0.906593	0.808962	0.57153	0.983698	0.381101	0.485062	0.52087	0.348112	0.462619	0.545835	0.412801	0.595736	0.893362
si:ch211-106h4.5	2	complement(31611034..31614391)	ENSDARG00000095059	-1.10168	-0.13971	0.962977	-1.32962	-0.411015	0.938134	-1.2069	-0.271305	0.912158	0.669744	0.296892	0.658108	1.44236	0.876186	0.60752	0.512361	0.245123	1.0821	0.383731	0.505859	0.254492
si:ch211-106h4.6	2	31614533..31626209	ENSDARG00000077219	1.55289	0.634957	0.846626	2.09568	1.06742	0.905005	1.34953	0.432462	0.909073	0.0680089	0	0	0.0878781	0	0.0264388	0.124866	0.0497818	0.0899029	0	0.215743	0.0258423
[truncated: 23,474 more rows]
